# Supplementary material
Source: MDPI journal article supplement (https://www.mdpi.com/2304-6740/11/1/25)
Supplement: s1 [file s1]

Archive with 5 entries (5 files):
- NK640__2020-IV_Pyr-312-nk640_s1_150K_FIN.cif
- NK640__2020-IV_Pyr-312-nk640_s1_150K_FIN__checkcif.pdf
- NK6941__20210608_s4_d1-2_autoTwinAbs_250K_FIN.cif
- NK6941__20210608_s4_d1-2_autoTwinAbs_250K_FIN__checkcif.pdf
- SI 17.12.2022.pdf
