# Supplementary material
Source: MDPI journal article supplement (https://www.mdpi.com/2304-6740/11/1/25)
Supplement: s1 [file s1 › NK640__2020-IV_Pyr-312-nk640_s1_150K_FIN.cif]

data_NK640__2020-iv_pyr-312-nk640_s1_150k2020-iv_pyr-312-nk640_s1_150k
_audit_creation_date               2022-04-18
_audit_creation_method
;
Olex2 1.3
(compiled 2020.11.12 svn.r5f609507 for OlexSys, GUI svn.r6408)
;
_shelx_SHELXL_version_number       '2014/7'
_audit_contact_author_address      ?
_audit_contact_author_email        ?
_audit_contact_author_name         ''
_audit_contact_author_phone        ?
_publ_contact_author_id_orcid      ?
_publ_section_references
;
Dolomanov, O.V., Bourhis, L.J., Gildea, R.J, Howard, J.A.K. & Puschmann, H.
 (2009), J. Appl. Cryst. 42, 339-341.

Sheldrick, G.M. (2015). Acta Cryst. A71, 3-8.

Sheldrick, G.M. (2015). Acta Cryst. C71, 3-8.
;
_chemical_name_common              ?
_chemical_name_systematic          ?
_chemical_formula_moiety           'Cl6 Sn1 2-, (C3 H10 N1 1+)2, Cl2'
_chemical_formula_sum              'C6 H20 Cl8 N2 Sn'
_chemical_formula_weight           522.53
_chemical_melting_point            ?
loop_
  _atom_type_symbol
  _atom_type_description
  _atom_type_scat_dispersion_real
  _atom_type_scat_dispersion_imag
  _atom_type_scat_source
 'C' 'C' 0.0033 0.0016 'International Tables Vol C Tables 4.2.6.8 and 6.1.1.4'
 'H' 'H' 0.0000 0.0000 'International Tables Vol C Tables 4.2.6.8 and 6.1.1.4'
 'Cl' 'Cl' 0.1484 0.1585 'International Tables Vol C Tables 4.2.6.8 and 6.1.1.4'
 'N' 'N' 0.0061 0.0033 'International Tables Vol C Tables 4.2.6.8 and 6.1.1.4'
 'Sn' 'Sn' -0.6537 1.4246
 'International Tables Vol C Tables 4.2.6.8 and 6.1.1.4'

_shelx_space_group_comment
;
The symmetry employed for this shelxl refinement is uniquely defined
by the following loop, which should always be used as a source of
symmetry information in preference to the above space-group names.
They are only intended as comments.
;
_space_group_crystal_system        'trigonal'
_space_group_IT_number             167
_space_group_name_H-M_alt          'R -3 c'
_space_group_name_Hall             '-R 3 2"c'
loop_
  _space_group_symop_operation_xyz
 'x, y, z'
 '-y, x-y, z'
 '-x+y, -x, z'
 'y, x, -z+1/2'
 'x-y, -y, -z+1/2'
 '-x, -x+y, -z+1/2'
 'x+2/3, y+1/3, z+1/3'
 '-y+2/3, x-y+1/3, z+1/3'
 '-x+y+2/3, -x+1/3, z+1/3'
 'y+2/3, x+1/3, -z+5/6'
 'x-y+2/3, -y+1/3, -z+5/6'
 '-x+2/3, -x+y+1/3, -z+5/6'
 'x+1/3, y+2/3, z+2/3'
 '-y+1/3, x-y+2/3, z+2/3'
 '-x+y+1/3, -x+2/3, z+2/3'
 'y+1/3, x+2/3, -z+7/6'
 'x-y+1/3, -y+2/3, -z+7/6'
 '-x+1/3, -x+y+2/3, -z+7/6'
 '-x, -y, -z'
 'y, -x+y, -z'
 'x-y, x, -z'
 '-y, -x, z-1/2'
 '-x+y, y, z-1/2'
 'x, x-y, z-1/2'
 '-x+2/3, -y+1/3, -z+1/3'
 'y+2/3, -x+y+1/3, -z+1/3'
 'x-y+2/3, x+1/3, -z+1/3'
 '-y+2/3, -x+1/3, z-1/6'
 '-x+y+2/3, y+1/3, z-1/6'
 'x+2/3, x-y+1/3, z-1/6'
 '-x+1/3, -y+2/3, -z+2/3'
 'y+1/3, -x+y+2/3, -z+2/3'
 'x-y+1/3, x+2/3, -z+2/3'
 '-y+1/3, -x+2/3, z+1/6'
 '-x+y+1/3, y+2/3, z+1/6'
 'x+1/3, x-y+2/3, z+1/6'

_cell_length_a                     9.4097(6)
_cell_length_b                     9.4097(6)
_cell_length_c                     36.738(3)
_cell_angle_alpha                  90
_cell_angle_beta                   90
_cell_angle_gamma                  120
_cell_volume                       2817.1(4)
_cell_formula_units_Z              6
_cell_measurement_reflns_used      8694
_cell_measurement_temperature      150(2)
_cell_measurement_theta_max        32.40
_cell_measurement_theta_min        2.73
_shelx_estimated_absorpt_T_max     0.886
_shelx_estimated_absorpt_T_min     0.739
_exptl_absorpt_coefficient_mu      2.482
_exptl_absorpt_correction_T_max    0.7466
_exptl_absorpt_correction_T_min    0.6702
_exptl_absorpt_correction_type     multi-scan
_exptl_absorpt_process_details
;
SADABS-2016/2 (Bruker,2016/2) was used for absorption correction.
wR2(int) was 0.0984 before and 0.0650 after correction.
The Ratio of minimum to maximum transmission is 0.8977.
The \l/2 correction factor is Not present.
;
_exptl_absorpt_special_details     ?
_exptl_crystal_colour              colourless
_exptl_crystal_colour_primary      colourless
_exptl_crystal_density_diffrn      1.848
_exptl_crystal_density_meas        ?
_exptl_crystal_density_method      ?
_exptl_crystal_description         prism
_exptl_crystal_F_000               1536
_exptl_crystal_size_max            0.13
_exptl_crystal_size_mid            0.08
_exptl_crystal_size_min            0.05
_exptl_transmission_factor_max     ?
_exptl_transmission_factor_min     ?
_diffrn_reflns_av_R_equivalents    0.0438
_diffrn_reflns_av_unetI/netI       0.0196
_diffrn_reflns_Laue_measured_fraction_full  0.996
_diffrn_reflns_Laue_measured_fraction_max  0.978
_diffrn_reflns_limit_h_max         13
_diffrn_reflns_limit_h_min         -13
_diffrn_reflns_limit_k_max         13
_diffrn_reflns_limit_k_min         -12
_diffrn_reflns_limit_l_max         53
_diffrn_reflns_limit_l_min         -53
_diffrn_reflns_number              12026
_diffrn_reflns_point_group_measured_fraction_full  0.996
_diffrn_reflns_point_group_measured_fraction_max  0.978
_diffrn_reflns_theta_full          25.242
_diffrn_reflns_theta_max           31.475
_diffrn_reflns_theta_min           2.734
_diffrn_ambient_temperature        150(2)
_diffrn_detector                   PIXEL
_diffrn_detector_area_resol_mean   7.41
_diffrn_detector_type              'Bruker PHOTON III area detector'
_diffrn_measured_fraction_theta_full  0.996
_diffrn_measured_fraction_theta_max  0.978
_diffrn_measurement_device         'three-circle diffractometer'
_diffrn_measurement_device_type    'Bruker D8 Venture Photon-III'
_diffrn_measurement_method         '\w and \f scans'
_diffrn_measurement_details
;
 Data collection was performed by Dr. D.A. Piryazev
 in XRD Facility of NIIC SB RAS.
;
_diffrn_radiation_monochromator    'Incoatec HELIOS multilayer mirrors'
_diffrn_radiation_type             MoK\a
_diffrn_radiation_wavelength       0.71073
_diffrn_source                     'Incoatec IuS3.0 microfocus X-ray tube'
_diffrn_source_current             1.4
_diffrn_source_power               0.07
_diffrn_source_voltage             50.0
_diffrn_standards_number           .
_reflns_Friedel_coverage           0.000
_reflns_Friedel_fraction_full      .
_reflns_Friedel_fraction_max       .
_reflns_number_gt                  952
_reflns_number_total               1019
_reflns_special_details
;
 Reflections were merged by SHELXL according to the crystal
 class for the calculation of statistics and refinement.
 
 _reflns_Friedel_fraction is defined as the number of unique
 Friedel pairs measured divided by the number that would be
 possible theoretically, ignoring centric projections and
 systematic absences.
;
_reflns_threshold_expression       'I > 2\s(I)'
_computing_cell_refinement         'Bruker SAINT'
_computing_data_collection         'Bruker APEX3'
_computing_data_reduction          'Bruker SAINT'
_computing_molecular_graphics      'Olex2 1.3 (Dolomanov et al., 2009)'
_computing_publication_material    'Olex2 1.3 (Dolomanov et al., 2009)'
_computing_structure_refinement    'SHELXL 2014/7 (Sheldrick, 2015)'
_computing_structure_solution      'SHELXT 2014/5 (Sheldrick, 2014)'
_refine_diff_density_max           0.229
_refine_diff_density_min           -0.365
_refine_diff_density_rms           0.053
_refine_ls_extinction_coef         .
_refine_ls_extinction_method       none
_refine_ls_goodness_of_fit_ref     1.116
_refine_ls_hydrogen_treatment      constr
_refine_ls_matrix_type             full
_refine_ls_number_parameters       34
_refine_ls_number_reflns           1019
_refine_ls_number_restraints       0
_refine_ls_R_factor_all            0.0197
_refine_ls_R_factor_gt             0.0179
_refine_ls_restrained_S_all        1.116
_refine_ls_shift/su_max            0.001
_refine_ls_shift/su_mean           0.000
_refine_ls_structure_factor_coef   Fsqd
_refine_ls_weighting_details      
 'w=1/[\s^2^(Fo^2^)+(0.0062P)^2^+2.9825P] where P=(Fo^2^+2Fc^2^)/3'
_refine_ls_weighting_scheme        calc
_refine_ls_wR_factor_gt            0.0388
_refine_ls_wR_factor_ref           0.0394
_refine_special_details            ?
_olex2_refinement_description
;
1. Fixed Uiso
 At 1.2 times of:
  All N(H) groups
 At 1.5 times of:
  All C(H,H,H) groups
2. Others
 Fixed Sof: Cl2(0.33333)
3.a Ternary CH refined with riding coordinates:
 N1(H1)
3.b Idealised Me refined as rotating group:
 C1(H1A,H1B,H1C)
;
_atom_sites_solution_hydrogens     geom
_atom_sites_solution_primary       dual
_atom_sites_solution_secondary     ?
loop_
  _atom_site_label
  _atom_site_type_symbol
  _atom_site_fract_x
  _atom_site_fract_y
  _atom_site_fract_z
  _atom_site_U_iso_or_equiv
  _atom_site_adp_type
  _atom_site_occupancy
  _atom_site_site_symmetry_order
  _atom_site_calc_flag
  _atom_site_refinement_flags_posn
  _atom_site_refinement_flags_adp
  _atom_site_refinement_flags_occupancy
  _atom_site_disorder_assembly
  _atom_site_disorder_group
 Sn1 Sn 0.6667 0.3333 0.3333 0.03013(7) Uani 1 6 d S T P . .
 Cl1 Cl 0.58652(4) 0.48971(4) 0.37223(2) 0.03646(9) Uani 1 1 d . . . . .
 N1 N 0.6667 0.3333 0.45092(5) 0.0285(4) Uani 1 3 d S T P . .
 H1 H 0.6667 0.3333 0.4237 0.034 Uiso 1 3 calc R U P . .
 C1 C 0.53178(19) 0.3601(2) 0.46304(4) 0.0441(3) Uani 1 1 d . . . . .
 H1A H 0.4278 0.2749 0.4527 0.066 Uiso 1 1 calc R U . . .
 H1B H 0.5533 0.4682 0.4548 0.066 Uiso 1 1 calc R U . . .
 H1C H 0.5249 0.3551 0.4897 0.066 Uiso 1 1 calc R U . . .
 Cl2 Cl 0.38217(12) 0.60799(12) 0.40366(3) 0.03470(19) Uani 0.3333 1 d . . P A
 -1

loop_
  _atom_site_aniso_label
  _atom_site_aniso_U_11
  _atom_site_aniso_U_22
  _atom_site_aniso_U_33
  _atom_site_aniso_U_23
  _atom_site_aniso_U_13
  _atom_site_aniso_U_12
 Sn1 0.03441(9) 0.03441(9) 0.02158(10) 0.000 0.000 0.01720(4)
 Cl1 0.04332(18) 0.03833(17) 0.03071(15) -0.00327(12) 0.00287(12) 0.02265(14)
 N1 0.0307(5) 0.0307(5) 0.0242(8) 0.000 0.000 0.0154(3)
 C1 0.0393(7) 0.0525(9) 0.0477(8) 0.0087(7) 0.0111(6) 0.0283(7)
 Cl2 0.0366(5) 0.0359(5) 0.0372(4) -0.0048(4) 0.0020(4) 0.0223(4)

_geom_special_details
;
 All esds (except the esd in the dihedral angle between two l.s. planes)
 are estimated using the full covariance matrix.  The cell esds are taken
 into account individually in the estimation of esds in distances, angles
 and torsion angles; correlations between esds in cell parameters are only
 used when they are defined by crystal symmetry.  An approximate (isotropic)
 treatment of cell esds is used for estimating esds involving l.s. planes.
;
loop_
  _geom_bond_atom_site_label_1
  _geom_bond_atom_site_label_2
  _geom_bond_distance
  _geom_bond_site_symmetry_2
  _geom_bond_publ_flag
 Sn1 Cl1 2.4262(3) 31_655 ?
 Sn1 Cl1 2.4261(3) 33_545 ?
 Sn1 Cl1 2.4262(3) 32 ?
 Sn1 Cl1 2.4261(3) . ?
 Sn1 Cl1 2.4261(3) 3_665 ?
 Sn1 Cl1 2.4261(3) 2_655 ?
 N1 H1 1.0000 . ?
 N1 C1 1.4809(16) 3_665 ?
 N1 C1 1.4809(15) 2_655 ?
 N1 C1 1.4809(15) . ?
 C1 H1A 0.9800 . ?
 C1 H1B 0.9800 . ?
 C1 H1C 0.9800 . ?
 Cl2 Cl2 1.9958(18) 10_455 ?

loop_
  _geom_angle_atom_site_label_1
  _geom_angle_atom_site_label_2
  _geom_angle_atom_site_label_3
  _geom_angle
  _geom_angle_site_symmetry_1
  _geom_angle_site_symmetry_3
  _geom_angle_publ_flag
 Cl1 Sn1 Cl1 88.825(12) 31_655 32 ?
 Cl1 Sn1 Cl1 88.828(12) 3_665 2_655 ?
 Cl1 Sn1 Cl1 88.829(12) 2_655 . ?
 Cl1 Sn1 Cl1 91.173(12) 33_545 2_655 ?
 Cl1 Sn1 Cl1 91.173(12) 32 . ?
 Cl1 Sn1 Cl1 91.174(12) 33_545 . ?
 Cl1 Sn1 Cl1 91.172(12) 31_655 3_665 ?
 Cl1 Sn1 Cl1 88.826(12) 31_655 33_545 ?
 Cl1 Sn1 Cl1 91.172(12) 32 3_665 ?
 Cl1 Sn1 Cl1 180.0 31_655 . ?
 Cl1 Sn1 Cl1 180.0 33_545 3_665 ?
 Cl1 Sn1 Cl1 88.827(12) 32 33_545 ?
 Cl1 Sn1 Cl1 88.828(12) 3_665 . ?
 Cl1 Sn1 Cl1 180.0 32 2_655 ?
 Cl1 Sn1 Cl1 91.173(12) 31_655 2_655 ?
 C1 N1 H1 107.5 2_655 . ?
 C1 N1 H1 107.5 3_665 . ?
 C1 N1 H1 107.5 . . ?
 C1 N1 C1 111.37(8) 2_655 3_665 ?
 C1 N1 C1 111.37(8) 3_665 . ?
 C1 N1 C1 111.37(8) 2_655 . ?
 N1 C1 H1A 109.5 . . ?
 N1 C1 H1B 109.5 . . ?
 N1 C1 H1C 109.5 . . ?
 H1A C1 H1B 109.5 . . ?
 H1A C1 H1C 109.5 . . ?
 H1B C1 H1C 109.5 . . ?

_shelx_res_file
;
    2020-iv_pyr%312%nk640_s1_150k.res created by SHELXL-2014/7

TITL 2020-iv_pyr%312%nk640_s1_150k_a.res in R-3c
REM Old TITL 2020-IV_Pyr%312%nk640_s1_150K in R-3c
REM SHELXT solution in R-3c
REM R1 0.072, Rweak 0.001, Alpha 0.022, Orientation as input
REM Formula found by SHELXT: C14 Cl6 Sn
CELL 0.71073 9.4097 9.4097 36.7385 90 90 120
ZERR 6 0.0006 0.0006 0.0029 0 0 0
LATT 3
SYMM -Y,+X-Y,+Z
SYMM +Y-X,-X,+Z
SYMM +Y,+X,0.5-Z
SYMM -Y+X,-Y,0.5-Z
SYMM -X,-X+Y,0.5-Z
SFAC C H Cl N Sn
UNIT 36 120 48 12 6
EQIV $1 -0.333+Y,0.333+X,0.833-Z

L.S. 4 0 0
PLAN  2
SIZE 0.05 0.08 0.13
TEMP -123(2)
CONF
BIND Cl2 Cl2_$1
list 4
MORE -1
BOND $H
fmap 2 53
acta
SHEL 17 0.68
REM <olex2.extras>
REM <HklSrc "%.\\2020-IV_Pyr%25312%25nk640_s1_150K.hkl">
REM </olex2.extras>

WGHT    0.006200    2.982500
FVAR       0.15415
SN1   5    0.666667    0.333333    0.333333    10.16667    0.03441    0.03441 =
         0.02158    0.00000    0.00000    0.01720
CL1   3    0.586518    0.489711    0.372231    11.00000    0.04332    0.03833 =
         0.03071   -0.00327    0.00287    0.02265
N1    4    0.666667    0.333333    0.450915    10.33333    0.03072    0.03072 =
         0.02415    0.00000    0.00000    0.01536
AFIX  13
H1    2    0.666663    0.333334    0.423696    10.33333   -1.20000
AFIX   0
C1    1    0.531784    0.360140    0.463035    11.00000    0.03931    0.05250 =
         0.04770    0.00865    0.01115    0.02830
AFIX 137
H1A   2    0.427838    0.274859    0.452682    11.00000   -1.50000
H1B   2    0.553317    0.468170    0.454780    11.00000   -1.50000
H1C   2    0.524934    0.355132    0.489664    11.00000   -1.50000
AFIX   0

PART -1
CL2   3    0.382170    0.607992    0.403663    10.33333    0.03658    0.03589 =
         0.03717   -0.00482    0.00201    0.02228
HKLF 4

REM  2020-iv_pyr%312%nk640_s1_150k_a.res in R-3c
REM R1 =  0.0179 for     952 Fo > 4sig(Fo)  and  0.0197 for all    1019 data
REM     34 parameters refined using      0 restraints

END

WGHT      0.0062      2.9824

REM Highest difference peak  0.229,  deepest hole -0.365,  1-sigma level  0.053
Q1    1   0.5606  0.4430  0.3527  11.00000  0.05    0.23
Q2    1   0.6294  0.4198  0.3538  11.00000  0.05    0.20
;
_shelx_res_checksum                15262
_shelx_hkl_file
;
   1   1   0 4991.10  246.08
   1  -2   0 4792.52  250.17
   1  -2   0 4873.41  248.68
   1   1   0 4859.41  246.48
  -2   1   0 4822.32  246.08
  -2   1   0 5037.80  247.18
   2  -1   0 4746.92  245.78
   2  -1   0 4350.16  246.38
  -1  -1   0 4857.11  246.78
  -1  -1   0 4896.81  246.18
  -1   2   0 5086.89  250.37
  -1   2   0 5210.38  248.88
  -3   3   0  169.38   10.00
   0  -3   0  184.88   10.00
  -3   3   0  178.98   10.00
   0  -3   0  197.98   10.30
  -3   0   0  188.98    9.90
   0   3   0  212.38   10.40
   3  -3   0  180.98   10.00
   3  -3   0  185.88   10.00
  -3   0   0  186.88   10.00
  -3   0   0  178.98    9.80
  -3   0   0  183.98   10.10
   0   3   0  165.18    9.90
  -4   2   0 1322.67   68.99
  -4   2   0 1253.97   66.89
   2   2   0 1177.68   66.79
   2  -4   0 1196.28   74.29
   2   2   0 1185.28   66.19
   4  -2   0 1291.07   65.89
  -2  -2   0 1258.37   68.59
  -2   4   0 1156.38   71.29
   4  -2   0 1124.19   68.89
  -2  -2   0 1265.17   66.99
  -2   4   0 1257.77   74.39
   1   4   0 1183.78   72.39
   4  -5   0 1222.28   73.49
   1   4   0 1199.58   70.79
   4  -5   0 1180.48   76.39
  -5   1   0 1282.27   64.19
  -4   5   0 1311.37   75.19
  -4   5   0 1188.78   77.19
  -1  -4   0 1206.38   71.79
  -1  -4   0 1182.58   74.69
  -5   4   0 1194.08   70.79
  -5   4   0 1327.07   74.69
   1  -5   0 1225.18   77.19
   1  -5   0 1265.67   73.69
   5  -4   0 1286.17   74.19
  -1   5   0 1090.29   71.99
  -4  -1   0 1193.18   64.29
  -1   5   0 1077.79   74.09
   5  -4   0 1194.58   69.79
  -6   3   0 1768.92   98.59
   3  -6   0 1759.62  103.89
   3   3   0 1743.13   95.79
   3   3   0 1630.44   94.19
  -6   3   0 1704.13   95.89
  -3   6   0 1900.41  105.19
   6  -3   0 1762.62   96.39
  -3   6   0 1843.92  108.49
   6  -3   0 1660.53   93.79
  -3  -3   0 1788.92   96.09
  -3  -3   0 1886.01   99.89
  -6   6   0  164.68   10.00
  -6   6   0  160.48    9.80
   0  -6   0  175.98   10.10
   0  -6   0  172.98   10.60
  -6   0   0  143.19    9.80
   6  -6   0  175.58   10.00
  -6   0   0  152.28    9.50
   6  -6   0  147.79    9.70
  -6   0   0  172.78    9.60
   0   6   0  177.58    9.90
  -6   0   0  184.78   10.10
   0   6   0  174.48   10.40
   5  -7   0  251.77   13.90
   5  -7   0  232.88   13.80
   2   5   0  228.98   14.10
  -7   2   0  236.48   13.30
  -7   2   0  241.78   13.70
  -7   2   0  241.18   13.70
   2   5   0  239.08   13.40
  -2  -5   0  243.28   14.20
  -5   7   0  230.48   14.10
  -2  -5   0  226.88   13.60
   7  -2   0  257.57   13.50
  -5   7   0  247.18   14.00
  -7   5   0  262.37   14.10
   2  -7   0  255.97   14.40
   2  -7   0  239.88   15.20
  -7   5   0  252.47   14.30
   5   2   0  239.58   14.40
  -5  -2   0  244.98   14.50
  -5  -2   0  240.88   13.80
  -2   7   0  238.58   14.10
  -2   7   0  230.68   14.50
   7  -5   0  274.77   14.20
  -5  -2   0  231.58   13.80
   7  -5   0  277.77   14.00
   7  -8   0  266.17   16.10
  -8   1   0  285.37   15.70
  -8   1   0  269.87   16.20
   1   7   0  308.77   16.90
  -8   1   0  251.17   15.50
   7  -8   0  288.97   16.30
  -8   1   0  289.47   16.30
  -7   8   0  286.57   16.40
  -1  -7   0  286.77   16.30
   4  -8   0   29.70    3.70
   4   4   0   34.80    4.20
  -8   4   0   25.90    3.40
   4  -8   0   31.90    3.90
   4   4   0   22.00    2.80
  -8   4   0   24.30    3.00
  -4   8   0   26.80    3.90
  -4  -4   0   26.10    3.20
  -4   8   0   35.10    4.30
   8  -4   0   27.70    3.30
   8  -4   0   29.30    2.70
  -4  -4   0   31.50    4.00
  -8   7   0  239.58   15.90
   1  -8   0  292.97   16.30
  -8   7   0  304.77   16.30
   8  -7   0  257.47   15.70
  -7  -1   0  283.67   15.50
  -1   8   0  269.17   16.50
  -7  -1   0  290.67   16.10
   8  -7   0  285.37   15.90
  -7  -1   0  276.77   15.60
  -9   3   0  248.18   16.10
   6  -9   0  288.37   16.60
  -9   3   0  279.77   16.00
  -9   3   0  295.17   16.60
   3   6   0  319.47   17.30
  -6   9   0  279.47   16.80
  -3  -6   0  275.77   16.30
   9  -3   0  293.47   16.10
   3  -9   0  275.47   16.50
  -9   6   0  317.97   16.70
  -9   6   0  263.97   16.00
   6   3   0  265.77   17.00
   9  -6   0  279.77   16.00
  -6  -3   0  283.17   16.00
  -3   9   0  294.47   17.10
  -6  -3   0  279.57   15.90
   9  -6   0  270.87   15.80
  -9   9   0   66.99    5.60
   0  -9   0   60.59    5.50
   0   9   0   66.89    6.10
  -9   0   0   56.19    4.70
   9  -9   0   62.99    5.30
  -9   0   0   56.49    5.30
 -10   2   0  214.28   13.50
   2   8   0  233.48   15.00
   8 -10   0  243.78   14.50
 -10   2   0  218.88   14.30
  -2  -8   0  235.58   14.40
  -8  10   0  257.17   14.80
   5   5   0  137.09    9.80
 -10   5   0  145.49    9.60
 -10   5   0  148.29    9.90
   5 -10   0  132.69    9.50
  10  -5   0  119.59    8.70
  -5  -5   0  129.49    9.10
  -5  10   0  170.08   10.30
   2 -10   0  229.18   14.40
 -10   8   0  206.88   14.00
  10  -8   0  252.27   14.10
  -2  10   0  227.18   14.80
  -8  -2   0  238.88   13.60
  -8  -2   0  226.48   14.10
 -11   1   0    2.90    1.40
   1  10   0    0.30    1.40
 -11   1   0    4.30    2.20
  10 -11   0    9.90    4.10
 -10  11   0    1.10    1.40
  -1 -10   0    2.40    2.70
 -11   4   0  244.68   15.40
   4   7   0  262.17   16.10
   7 -11   0  267.57   15.70
  11  -4   0  222.98   15.90
  -7  11   0  233.38   15.50
  -4  -7   0  263.57   15.30
   4 -11   0  253.17   16.00
   7   4   0  254.87   16.20
  11  -7   0  263.37   15.30
  -4  11   0  264.27   16.40
  -7  -4   0  263.77   15.30
  -7  -4   0  245.98   15.80
   1 -11   0    2.00    1.60
 -11  10   0    4.60    1.90
 -10  -1   0    3.90    1.50
  -1  11   0    3.00    2.10
 -10  -1   0    5.90    2.10
  11 -10   0    5.90    2.00
   3   9   0   34.20    5.40
 -12   3   0   38.30    4.40
 -12   3   0   36.10    5.20
   9 -12   0   37.40    5.10
  -9  12   0   38.50    5.30
  -3  -9   0   31.10    5.00
 -12   6   0   70.29    6.50
   6 -12   0   91.99    7.30
   6   6   0   75.49    7.50
  12  -6   0   70.79    6.10
  -6  -6   0   80.29    6.50
  -6  12   0   86.39    7.40
 -12   9   0   37.60    5.20
   3 -12   0   35.20    5.10
  12  -9   0   36.90    4.60
  -9  -3   0   35.30    4.40
  -9  -3   0   35.20    4.90
  -3  12   0   36.70    5.60
 -12  12   0   54.69    6.60
 -12   0   0   58.49    5.20
 -13   2   0    9.80    2.40
 -11  13   0   12.50    3.30
 -13   5   0   68.99    5.70
 -13   5   0   63.19    6.50
  -8  13   0   64.79    7.80
  -5  -8   0   68.29    6.30
 -13   8   0   73.09    6.40
  -8  -5   0   62.69    5.80
  -5  13   0   61.19    8.50
  13  -8   0   59.89    5.70
 -11  -2   0    5.40    2.80
 -14   7   0   27.40    4.90
  14  -7   0   28.00    4.10
 -10  -4   0   19.10    4.00
   0   1  -1    0.20    0.20
   0   1  -1    0.10    0.20
  -1   0  -1    0.10    0.20
   1  -1  -1    0.20    0.20
   1  -1  -1    0.20    0.20
  -1   0  -1    0.00    0.20
   0  -1   1    0.10    0.20
  -1   1   1   -0.10    0.20
   1   0   1    0.10    0.20
  -1   1   1    0.10    0.20
   0  -1   1   -0.20    0.10
   1   0   1    0.10    0.20
  -1   3  -1   56.69    3.50
   3  -2  -1   53.89    3.20
  -2  -1  -1   55.09    3.40
  -2  -1  -1   48.40    3.10
  -1   3  -1   50.49    3.20
   3  -2  -1   46.40    3.20
   2   1   1   47.10    3.30
   1  -3   1   47.30    3.20
  -3   2   1   50.29    3.10
  -3   2   1   57.59    3.40
   1  -3   1   47.70    3.30
   2   1   1   52.49    3.20
   2   0  -1    0.00    0.20
   0  -2  -1    0.50    0.40
   0  -2  -1   -0.30    0.30
  -2   2  -1    0.30    0.40
  -2   2  -1   -0.20    0.30
   0   2   1    0.40    0.50
   0   2   1   -0.20    0.30
  -2   0   1    1.10    0.50
   2  -2   1    0.10    0.30
  -2   0   1    0.20    0.30
  -2   0   1   -0.20    0.20
   2  -2   1    0.20    0.40
  -2   0   1   -0.30    0.20
  -2   5  -1  468.25   23.30
  -3  -2  -1  454.15   22.80
  -2   5  -1  439.96   23.00
   5  -3  -1  369.26   22.60
   5  -3  -1  457.15   22.80
  -3  -2  -1  448.36   23.20
  -5   3   1  402.66   22.90
   2  -5   1  415.16   23.10
   3   2   1  479.55   23.50
   3   2   1  420.76   22.70
  -5   3   1  422.76   22.70
   2  -5   1  456.35   23.10
   1   2  -1   50.79    3.10
   2  -3  -1   51.39    3.30
   1   2  -1   59.29    3.50
  -3   1  -1   50.09    3.10
  -3   1  -1   49.20    3.10
   2  -3  -1   48.70    3.40
  -2   3   1   48.00    3.40
  -1  -2   1   53.39    3.40
  -2   3   1   47.70    3.20
   3  -1   1   57.49    3.20
   3  -1   1   54.19    3.20
  -1  -2   1   46.20    3.10
  -3   4  -1  178.98    9.20
  -1  -3  -1  160.48    8.90
   4  -1  -1  156.58    8.70
  -3   4  -1  154.08    9.00
  -4   1   1  161.28    8.90
  -4   1   1  151.68    9.00
   1   3   1  163.38    9.30
  -4   1   1  155.38    8.70
  -4  -3  -1    0.00    0.80
   7  -4  -1    0.70    0.70
  -4  -3  -1    1.40    0.80
  -3   7  -1    0.40    0.80
   7  -4  -1    0.60    0.70
  -3   7  -1    1.00    1.00
  -7   4   1    0.60    0.90
   3  -7   1    0.80    0.80
   3  -7   1    1.00    1.00
   4   3   1    0.40    1.00
  -7   4   1    1.50    0.80
   4   3   1    0.60    0.60
  -4   0  -1    0.10    0.50
  -4   0  -1   -0.10    0.40
   4  -4  -1    0.00    0.40
  -4   0  -1   -0.20    0.60
  -4   0  -1   -0.20    0.40
   0   4  -1   -0.20    0.40
   4  -4  -1    0.40    0.60
   0   4  -1    0.10    0.60
   0  -4   1    1.10    0.70
  -4   4   1    1.20    0.80
  -4   4   1   -0.30    0.40
   0  -4   1    0.80    0.60
   1  -4  -1  167.08    9.30
  -4   3  -1  156.68    9.00
   1  -4  -1  166.68    9.10
  -4   3  -1  152.98    8.90
   3   1  -1  140.19    9.00
   4  -3   1  152.68    8.90
  -3  -1   1  146.19    9.40
  -1   4   1  166.18    9.10
  -1   4   1  164.38    9.30
  -3  -1   1  170.38    8.90
  -3  -1   1  157.98    8.70
   4  -3   1  188.58    9.00
  -4   6  -1  240.98   13.20
   6  -2  -1  256.27   12.80
  -2  -4  -1  225.68   12.90
  -2  -4  -1  191.98   13.20
  -4   6  -1  233.48   13.20
  -6   2   1  221.88   13.00
   4  -6   1  255.87   13.30
   2   4   1  257.97   13.60
   2   4   1  225.28   12.80
   4  -6   1  228.78   13.20
  -6   2   1  225.88   13.00
  -6   2   1  225.98   12.70
   9  -5  -1   39.60    3.50
  -4   9  -1   41.10    5.00
   9  -5  -1   38.00    3.40
  -5  -4  -1   41.70    3.70
  -5  -4  -1   36.00    4.00
   4  -9   1   35.60    4.30
   5   4   1   48.30    4.50
  -9   5   1   35.00    4.00
  -9   5   1   41.00    4.10
  -1   6  -1  245.48   14.10
  -5  -1  -1  263.17   14.00
   6  -5  -1  223.38   13.50
  -5  -1  -1  246.58   13.40
   6  -5  -1  216.88   13.40
  -1   6  -1  241.78   13.70
  -5  -1  -1  254.57   13.60
  -6   5   1  266.87   14.00
   5   1   1  264.97   14.00
   1  -6   1  242.38   13.80
   1  -6   1  236.58   14.10
  -6   5   1  228.38   13.50
   3  -5  -1  414.96   23.20
  -5   2  -1  419.56   22.90
   2   3  -1  475.65   23.50
   3  -5  -1  465.65   23.70
  -5   2  -1  423.66   22.90
   2   3  -1  478.55   22.90
  -2  -3   1  431.96   22.90
   5  -2   1  441.16   22.90
  -3   5   1  431.16   23.10
  -2  -3   1  423.06   23.40
  -3   5   1  421.26   23.30
  -5   5  -1   12.50    1.90
   0  -5  -1   11.60    2.00
   0  -5  -1    8.40    1.50
   5  -5   1    9.90    1.70
   5  -5   1   15.00    1.90
  -3  -5  -1    5.10    1.50
  -5   8  -1    4.90    1.60
   8  -3  -1    3.90    1.20
   5  -8   1    2.70    1.20
  -8   3   1    4.70    1.50
   3   5   1    6.80    1.90
  -8   3   1    6.20    1.50
   3   5   1    5.50    1.40
  -8   3   1    7.20    1.90
  -6  -5  -1   46.50    5.20
  11  -6  -1   38.00    4.40
  -5  11  -1   38.80    5.50
   5 -11   1   41.20    5.20
   6   5   1   50.69    6.30
 -11   6   1   41.80    5.20
  -6  -2  -1  114.99    8.20
   8  -6  -1  137.19    7.90
  -2   8  -1  142.89    8.80
  -6  -2  -1  109.59    7.60
   8  -6  -1  121.39    7.80
  -6  -2  -1  126.19    7.70
  -8   6   1  113.39    7.70
  -8   6   1  102.39    7.90
   2  -8   1  120.29    8.10
   6   2   1  117.59    8.20
   2  -8   1  142.29   11.50
   1   5  -1  218.48   13.40
  -6   1  -1  239.98   13.00
   1   5  -1  228.38   12.90
  -6   1  -1  217.18   12.70
   5  -6  -1  247.48   13.20
   5  -6  -1  238.98   13.20
  -6   1  -1  229.98   13.10
  -1  -5   1  252.87   13.20
  -5   6   1  231.38   13.30
  -5   6   1  239.58   13.10
  -1  -5   1  206.08   13.30
   6  -1   1  226.98   12.80
  -6   4  -1  244.68   13.20
   2  -6  -1  229.28   13.40
   2  -6  -1  237.58   13.20
   4   2  -1  236.68   13.40
  -6   4  -1  231.98   12.90
   6  -4   1  253.67   13.00
  -4  -2   1  228.68   12.80
  -4  -2   1  238.78   12.80
   6  -4   1  222.48   12.70
  -4  -2   1  237.28   13.40
  -2   6   1  241.98   13.20
  -2   6   1  193.18   13.20
  -1  -6  -1   41.40    3.60
  -6   7  -1   43.80    3.70
  -1  -6  -1   41.40    3.90
  -6   7  -1   43.70    3.60
  -7   1   1   40.60    3.60
  -7   1   1   36.00    3.10
  -7   1   1   33.80    3.00
  -7   1   1   31.70    3.30
   1   6   1   32.30    3.20
   6  -7   1   35.60    3.40
   6  -7   1   47.20    3.80
   1   6   1   38.30    3.90
  -6  10  -1   30.50    4.90
  10  -4  -1   30.90    3.70
  -4  -6  -1   30.70    4.10
   6 -10   1   29.70    4.10
 -10   4   1   27.00    3.50
   4   6   1   27.50    4.30
 -10   4   1   32.60    4.50
  -6  13  -1    0.20    1.50
  13  -7  -1   -0.50    1.00
 -13   7   1    2.20    1.70
  -7  -3  -1    4.80    1.90
  -7  -3  -1    6.70    1.80
  -3  10  -1    5.20    2.10
 -10   7   1    7.90    2.30
   7   3   1    6.30    2.20
   3 -10   1    9.40    2.40
   7  -7  -1    0.20    1.00
  -7   0  -1    0.90    1.00
  -7   0  -1   -0.20    0.70
  -7   0  -1    0.70    0.70
   0   7  -1    0.60    1.00
   0   7  -1    0.30    0.70
  -7   0  -1   -0.30    0.50
   7  -7  -1    0.40    0.70
  -7   7   1   -0.20    0.80
   0  -7   1    1.60    1.10
  -7   7   1   -0.50    0.60
   3   4  -1   -0.10    0.90
   4  -7  -1    1.30    1.00
   3   4  -1    2.50    0.90
  -7   3  -1    1.50    0.70
  -7   3  -1    1.00    0.80
   4  -7  -1    0.40    0.80
  -7   3  -1    0.40    0.80
  -4   7   1    2.10    1.10
   7  -3   1    0.50    0.70
   7  -3   1    0.90    0.70
  -3  -4   1    0.40    0.70
  -7   6  -1   43.10    3.70
  -7   6  -1   45.70    4.70
   1  -7  -1   41.90    4.00
   1  -7  -1   40.10    3.60
  -1   7   1   42.40    4.00
  -6  -1   1   33.70    4.60
   7  -6   1   34.50    3.20
  -6  -1   1   35.40    3.50
  -6  -1   1   39.90    3.20
  -6  -1   1   35.60    3.00
  -1   7   1   41.80    3.50
   7  -6   1   39.70    3.50
  -7   9  -1  151.88    9.70
  -2  -7  -1  142.19   10.60
  -9   2   1  147.19    9.60
  -9   2   1  131.09    8.70
  -9   2   1  141.19    8.80
   7  -9   1  134.39    9.40
   2   7   1  149.09   10.00
   7  -9   1  140.09    9.40
  -5  -7  -1    4.90    1.90
  -7  12  -1    5.90    2.40
  12  -5  -1    9.20    2.20
 -12   5   1    6.10    2.50
   7 -12   1    6.20    2.30
   5   7   1    7.60    2.70
  -8  -4  -1   31.10    5.20
  -8  -4  -1   39.60    4.70
  12  -8  -1   35.60    4.40
 -12   8   1   34.30    4.80
   4 -12   1   37.60    5.10
   9  -8  -1   79.49    6.70
  -1   9  -1   74.99    6.70
  -8  -1  -1   76.39    5.70
  -8  -1  -1   88.19    6.50
  -8  -1  -1   79.39    5.90
   1  -9   1   79.99    6.40
  -9   8   1   77.59    6.40
   2   6  -1  121.99    8.60
   2   6  -1  133.59    8.00
  -8   2  -1  124.19    7.80
  -8   2  -1  118.39    8.10
  -8   2  -1  118.49    8.00
   6  -8  -1  131.99    8.50
   6  -8  -1  129.19    8.30
  -2  -6   1  128.39    8.20
  -6   8   1  113.19    8.30
   8  -2   1  127.69    7.90
   3  -8  -1    4.00    1.50
   3  -8  -1    5.20    1.60
  -8   5  -1    7.50    1.90
   5   3  -1    3.40    1.40
  -3   8   1    6.90    2.00
  -5  -3   1    4.50    1.60
   8  -5   1    2.90    1.20
  -5  -3   1    5.50    1.40
  -5  -3   1    4.80    1.30
   8  -5   1    5.90    1.40
   0  -8  -1   -0.20    0.90
  -8   8  -1   -0.40    0.90
   8  -8   1    1.30    1.10
   8  -8   1   -0.20    0.90
  -8   0   1   -0.10    0.90
   0   8   1    0.80    1.30
  -8   0   1    0.20    0.70
  -3  -8  -1   17.20    3.10
  -8  11  -1   21.30    3.70
   3   8   1   15.90    3.60
 -11   3   1   17.60    3.60
 -11   3   1   21.30    3.50
   8 -11   1   23.20    3.80
 -14   6   1    4.40    1.90
 -14   6   1   -0.20    1.50
 -14   9   1    7.90    2.60
  -9  -2  -1    1.20    1.10
  -2  11  -1    2.50    1.70
  -9  -2  -1   -0.70    1.10
  11  -9  -1   -0.20    0.90
 -11   9   1    1.20    1.30
   2 -11   1    1.90    1.70
  -9   1  -1   76.99    5.60
   1   8  -1   83.19    6.80
  -9   1  -1   73.29    5.60
   8  -9  -1   70.79    6.00
  -9   1  -1   78.09    6.20
  -1  -8   1   75.69    6.10
  -8   9   1   79.49    6.40
   4   5  -1   44.40    5.80
   4   5  -1   33.00    3.70
  -9   4  -1   35.60    4.40
  -9   4  -1   43.00    3.60
   5  -9  -1   33.30    4.60
  -9   4  -1   41.10    4.70
  -5   9   1   40.40    4.90
  -4  -5   1   33.40    4.00
   9  -4   1   41.40    3.60
  -9   7  -1  134.69    9.10
   2  -9  -1  124.69    9.10
  -7  -2   1  150.58    8.80
   9  -7   1  128.49    8.60
  -7  -2   1  130.49    9.60
  -2   9   1  169.78   10.20
   9  -7   1  136.79    9.00
  -7  -2   1  137.79    8.70
  -9  10  -1    2.30    1.30
  -1  -9  -1    4.70    1.90
   1   9   1    6.50    2.50
   9 -10   1    2.50    1.50
 -10   1   1    5.50    1.60
 -10   1   1    6.20    2.30
  -9  13  -1    3.90    2.10
  -4  -9  -1    0.00    1.60
 -13   4   1    2.60    1.50
  13 -10  -1    0.20    1.20
 -13  10   1    0.30    1.30
   0  10  -1    0.30    1.40
 -10   0  -1    0.30    0.80
  10 -10  -1    0.00    1.00
 -10   0  -1   -0.20    1.10
 -10  10   1    0.90    1.20
   0 -10   1    1.00    1.30
   3   7  -1    9.70    2.70
 -10   3  -1    5.70    2.10
   7 -10  -1    2.50    1.60
  -7  10   1    5.10    2.00
  -3  -7   1    4.50    1.70
  10  -3   1    6.90    1.80
   4 -10  -1   34.90    4.60
   6   4  -1   26.90    4.10
 -10   6  -1   31.60    4.10
  10  -6   1   29.80    3.00
  -6  -4   1   29.80    3.90
  10  -6   1   36.10    4.20
  -4  10   1   27.90    4.50
 -10   9  -1    4.30    2.00
   1 -10  -1    2.20    1.60
  -1  10   1    1.30    1.70
  -9  -1   1    4.70    1.50
  10  -9   1    4.50    1.60
  -9  -1   1    3.50    1.70
 -10  12  -1   -0.20    1.30
  -2 -10  -1    0.90    1.40
 -12   2   1    0.30    1.70
  10 -12   1    0.80    1.40
 -12   2   1    1.20    1.10
  12 -11  -1   -1.30    1.10
 -11  -1  -1   -1.00    1.30
 -11  -1  -1    1.00    1.30
 -12  11   1    2.10    1.70
   9 -11  -1    2.80    1.60
 -11   2  -1    1.50    1.10
 -11   2  -1    1.20    1.50
  -2  -9   1    1.60    1.60
  -9  11   1    5.80    2.20
   6 -11  -1   49.50    6.00
   5   6  -1   50.89    6.30
  -5  -6   1   40.40    4.80
  -6  11   1   40.20    5.60
  11  -5   1   45.80    4.30
   3 -11  -1   19.00    3.40
 -11   8  -1   25.30    4.40
  -8  -3   1   27.90    4.30
  -3  11   1   17.70    3.80
  11  -8   1   20.10    3.20
  -8  -3   1   15.50    2.70
 -11  11  -1    0.80    1.10
   0 -11  -1   -0.90    0.80
 -11   0   1    0.90    2.90
 -11   0   1   -0.60    0.70
  11 -11   1   -0.50    1.00
 -12   1  -1   -0.20    1.50
 -12   1  -1    0.40    1.00
 -11  12   1    0.00    1.30
   4   8  -1   41.70    5.80
 -12   4  -1   38.10    5.50
   8 -12  -1   43.00    5.50
 -12   4  -1   34.80    4.30
  -4  -8   1   36.20    4.80
  -8  12   1   39.90    5.60
 -12   7  -1    6.70    2.10
   5 -12  -1    4.30    2.10
   7   5  -1    7.10    2.90
  12  -7   1    5.10    1.80
  -7  -5   1    7.40    2.50
  -7  -5   1    5.30    1.90
  -5  12   1    3.60    2.10
 -12  10  -1    0.20    1.10
 -10  -2   1    0.40    1.40
  12 -10   1    0.10    1.30
 -10  -2   1   -0.70    0.80
 -12  13  -1   -0.60    1.70
 -13   3  -1   -2.10    1.20
 -13   3  -1   -0.30    0.80
 -10  13   1    0.50    1.50
 -13   6  -1   -1.40    1.10
  -7  13   1    0.40    1.40
  13  -6   1    0.60    1.20
 -13   9  -1    3.60    1.80
  -9  -4   1    1.90    1.50
  13  -9   1    3.20    1.70
 -14   5  -1    8.30    2.80
 -14   5  -1    8.80    2.30
 -14   8  -1    3.50    1.80
  14  -8   1    2.10    1.70
  -8  -6   1    2.40    1.90
  -1   1  -2 2497.45  133.49
   1   0  -2 2655.33  132.09
   1   0  -2 2613.14  131.89
   0  -1  -2 2695.23  133.19
   0   1   2 2557.14  133.09
   1  -1   2 2683.33  133.69
  -1   0   2 2675.73  132.19
  -1   0   2 2482.45  132.79
   0   2  -2  886.01   50.19
   0   2  -2  842.92   46.70
   2  -2  -2  768.32   48.10
  -2   2   2  791.92   48.20
   0  -2   2  761.32   46.20
   0  -2   2  879.51   48.20
  -2   2   2  868.41   47.10
  -1  -2  -2   83.69    5.30
  -2   3  -2   80.89    5.10
  -1  -2  -2   85.89    5.10
   3  -1  -2   90.39    4.90
  -2   3  -2   86.29    5.10
   3  -1  -2   91.19    5.10
   2  -3   2   91.89    5.20
   2  -3   2   82.49    5.10
  -3   1   2   94.59    5.20
   1   2   2   83.19    5.20
   1   2   2   87.99    5.00
  -3   1   2   96.49    4.90
  -1   4  -2 1952.00  109.49
   4  -3  -2 1935.81  106.99
  -3  -1  -2 2089.09  103.79
  -3  -1  -2 2074.59  102.59
  -1   4  -2 2010.90  112.39
   4  -3  -2 1875.61  109.59
  -4   3   2 2116.99  111.49
  -4   3   2 1890.31  107.79
   1  -4   2 1998.00  110.39
  -3   2  -2  104.89    5.40
   1  -3  -2   82.09    5.40
   1  -3  -2  100.09    5.70
   2   1  -2   80.39    5.10
  -3   2  -2   83.99    5.30
  -2  -1   2   88.29    5.20
  -1   3   2  110.39    5.80
  -1   3   2   85.79    5.40
   3  -2   2   94.69    5.40
   3  -2   2  103.99    5.30
  -2  -1   2  106.99    5.60
  -3   5  -2 2616.44  144.89
  -3   5  -2 2735.13  149.09
   5  -2  -2 2580.24  136.09
  -2  -3  -2 2701.83  140.59
  -2  -3  -2 2564.14  142.99
   5  -2  -2 2236.18  137.09
   3  -5   2 2676.13  149.19
   2   3   2 2642.74  139.29
  -5   2   2 2836.92  140.79
  -5   2   2 2770.42  138.39
   2   3   2 2511.15  140.09
   3  -5   2 2890.41  146.29
  -2   6  -2 1131.89   59.59
  -4  -2  -2 1186.48   59.89
  -4  -2  -2 1187.68   59.49
  -6   4   2 1129.19   59.39
   2  -6   2 1185.08   59.99
   1   3  -2 1822.82  106.89
   3  -4  -2 1847.72  108.19
  -4   1  -2 2074.69  101.09
  -4   1  -2 2017.90  101.59
   1   3  -2 1886.91  105.69
   3  -4  -2 2003.80  111.79
  -1  -3   2 2015.00  106.49
  -3   4   2 2084.09  112.99
  -1  -3   2 1960.50  108.69
  -4   4  -2  501.45   24.80
  -4   4  -2  475.15   24.80
   0  -4  -2  479.75   24.80
   0  -4  -2  549.85   25.30
  -4   0   2  473.75   24.50
  -4   0   2  442.96   24.80
   0   4   2  395.86   24.90
   4  -4   2  483.95   24.70
  -4   0   2  444.36   24.70
   0   4   2  456.65   24.70
   4  -4   2  517.55   24.90
  -4   0   2  479.35   24.50
  -4   7  -2  647.34   31.70
  -3  -4  -2  595.64   31.20
   7  -3  -2  619.74   31.00
  -3  -4  -2  555.84   32.50
   7  -3  -2  602.74   30.90
  -4   7  -2  527.05   32.00
   3   4   2  568.44   31.00
  -7   3   2  572.04   30.80
   4  -7   2  568.04   31.40
   3   4   2  598.74   31.60
  -7   3   2  649.93   31.60
   4  -7   2  572.74   31.30
  -5  -3  -2   85.09    6.80
   8  -5  -2   98.19    6.40
  -5  -3  -2   99.49    6.50
   8  -5  -2   90.29    6.30
  -3   8  -2   98.39    7.10
   3  -8   2   88.49    6.90
  -8   5   2   96.39    6.40
   5   3   2   91.39    6.90
   3  -8   2  100.09    6.90
  -8   5   2  125.09    7.30
   0   5  -2  415.96   22.90
  -5   0  -2  417.76   22.30
  -5   0  -2  468.95   22.70
   0   5  -2  428.46   22.50
   5  -5  -2  417.96   22.50
  -5   0  -2  435.06   22.40
  -5   5   2  416.66   22.50
   0  -5   2  430.16   22.60
   0  -5   2  381.76   22.80
   2  -5  -2 2881.21  153.58
   2  -5  -2 2562.74  147.79
  -5   3  -2 2876.91  145.69
   3   2  -2 2618.64  139.29
  -5   3  -2 2667.03  142.99
   3   2  -2 2765.82  140.69
  -3  -2   2 2735.63  142.79
   5  -3   2 2744.83  144.29
  -2   5   2 2652.73  147.89
  -2   5   2 2776.82  152.28
  -3  -2   2 2542.45  140.39
   5  -3   2 2610.44  141.49
  -1  -5  -2 1077.09   54.79
  -5   6  -2 1030.40   54.19
  -1  -5  -2 1056.09   54.19
   5  -6   2 1077.49   54.29
   1   5   2 1035.60   53.99
  -6   1   2 1016.40   53.69
  -6   1   2 1068.09   53.79
  -6   1   2 1129.79   54.39
   5  -6   2  998.50   54.09
  -4  -5  -2   42.10    4.50
   9  -4  -2   45.70    3.80
  -5   9  -2   47.90    4.50
   5  -9   2   47.80    5.70
   5  -9   2   49.70    4.40
  -9   4   2   41.40    4.30
  -9   4   2   38.70    3.90
  -6  -4  -2   48.00    5.70
  10  -6  -2   49.30    4.30
  -4  10  -2   57.69    5.20
   4 -10   2   50.39    5.60
   6   4   2   47.60    4.90
 -10   6   2   48.10    4.80
  -6  -1  -2  196.78   11.40
  -1   7  -2  194.78   11.60
  -6  -1  -2  167.78   11.40
  -1   7  -2  215.18   12.30
  -6  -1  -2  209.08   11.60
  -6  -1  -2  227.88   12.20
   7  -6  -2  218.48   11.70
   7  -6  -2  189.08   11.50
   1  -7   2  178.08   12.00
  -7   6   2  193.58   11.90
   1  -7   2  197.28   11.80
  -7   6   2  204.98   11.60
   2   4  -2 1129.79   58.49
  -6   2  -2 1121.99   57.99
  -6   2  -2 1245.48   58.19
   2   4  -2 1150.28   57.89
  -2  -4   2 1016.80   58.49
  -4   6   2 1144.89   58.29
  -6   5  -2 1020.20   52.99
   1  -6  -2 1115.09   53.69
   1  -6  -2 1037.30   53.19
   6  -5   2  993.10   52.99
   6  -5   2  967.90   52.69
  -5  -1   2  987.80   53.29
  -1   6   2 1038.70   53.59
  -5  -1   2  955.30   52.99
  -5  -1   2 1060.29   52.59
  -1   6   2 1077.69   53.09
  -5  -1   2 1097.29   52.79
   8  -2  -2  227.58   13.00
  -6   8  -2  238.98   13.70
  -2  -6  -2  241.88   13.60
   6  -8   2  212.58   13.50
  -8   2   2  208.68   12.90
   2   6   2  216.78   13.20
   2   6   2  258.77   14.30
  -8   2   2  240.88   13.70
  -8   2   2  236.88   13.70
   6  -8   2  227.28   13.60
  11  -5  -2   43.40    4.40
  -6  11  -2   35.70    5.00
  -5  -6  -2   36.00    4.40
   6 -11   2   33.50    4.70
 -11   5   2   33.40    4.90
   5   6   2   30.90    4.70
  12  -7  -2   -0.50    0.90
  -7  -5  -2   -0.10    1.10
  -5  12  -2   -0.70    1.00
 -12   7   2    0.30    1.20
   5 -12   2   -0.60    1.10
  -2   9  -2  366.86   22.00
   9  -7  -2  404.36   21.40
   9  -7  -2  407.86   21.40
  -7  -2  -2  363.66   21.10
  -7  -2  -2  381.16   21.30
   2  -9   2  373.36   21.70
  -9   7   2  392.66   21.90
  -7   1  -2  232.28   11.80
   6  -7  -2  182.68   11.90
  -7   1  -2  202.28   11.90
   1   6  -2  195.88   12.20
   1   6  -2  197.78   12.30
  -7   1  -2  203.48   11.80
  -7   1  -2  203.38   11.70
   6  -7  -2  217.58   12.10
  -6   7   2  192.78   12.10
  -6   7   2  201.38   11.90
  -1  -6   2  203.28   12.50
  -1  -6   2  199.48   11.90
   3  -7  -2  587.74   30.60
  -7   4  -2  612.44   30.50
   3  -7  -2  527.55   30.70
   4   3  -2  591.44   30.10
  -7   4  -2  575.54   30.30
   4   3  -2  583.74   30.80
  -4  -3   2  600.24   30.20
  -3   7   2  541.35   30.90
   7  -4   2  552.94   30.20
   7  -4   2  573.04   29.90
  -4  -3   2  603.14   32.60
  -3   7   2  546.75   30.80
  -7   7  -2  162.18   10.40
  -7   7  -2  171.68   10.50
   0  -7  -2  169.38   10.60
  -7   0   2  169.88    9.90
   7  -7   2  163.78   10.40
   7  -7   2  202.48   10.60
   0   7   2  165.78   10.40
  -7   0   2  151.78   10.40
  -7   0   2  175.78   10.00
   0   7   2  166.68   11.00
  -7   0   2  181.98   10.80
  -3  -7  -2  316.37   18.30
  -7  10  -2  302.27   19.10
 -10   3   2  287.87   17.40
   7 -10   2  338.67   18.60
   3   7   2  327.97   19.00
 -10   3   2  305.37   17.50
  -6  -7  -2    0.10    1.30
  -7  13  -2    1.20    1.60
  13  -6  -2    0.70    1.20
 -13   6   2    1.70    1.90
  14  -8  -2    0.90    1.40
 -14   8   2    5.10    2.00
  -3  11  -2   79.89    7.10
  -8  -3  -2   76.49    6.50
  -8  -3  -2   68.29    5.90
  11  -8  -2   83.79    6.20
 -11   8   2   77.19    6.60
   3 -11   2   70.19    6.50
  -8   0  -2  348.87   19.10
  -8   0  -2  369.06   19.50
   0   8  -2  367.46   20.20
  -8   0  -2  334.97   18.90
   8  -8  -2  346.37   19.40
   8  -8  -2  317.27   19.20
  -8   8   2  315.27   19.50
   3   5  -2   94.09    7.00
  -8   3  -2   98.39    6.60
   5  -8  -2  108.19    7.20
   3   5  -2   88.89    6.70
   5  -8  -2   96.09    6.80
  -8   3  -2   99.59    6.70
  -8   3  -2  100.79    6.50
  -3  -5   2  106.19    6.70
  -5   8   2   85.69    6.90
  -5   8   2   80.19    6.80
   8  -3   2  107.09    6.60
  -8   6  -2  237.48   13.70
  -8   6  -2  266.97   13.90
   2  -8  -2  228.08   13.90
  -6  -2   2  221.28   15.10
  -2   8   2  219.48   14.20
  -6  -2   2  218.68   13.20
   8  -6   2  237.38   13.60
  -6  -2   2  227.18   13.20
   8  -6   2  222.48   13.20
  -6  -2   2  265.57   14.10
  -8   9  -2  226.68   13.30
  -1  -8  -2  214.38   13.20
   8  -9   2  203.18   13.00
  -9   1   2  202.68   12.30
  -9   1   2  212.78   12.30
   8  -9   2  181.78   12.60
   1   8   2  253.87   14.20
  -4  -8  -2   19.50    3.60
  -8  12  -2   27.30    4.40
 -12   4   2   37.40    4.20
   4   8   2   30.30    4.80
   8 -12   2   37.20    4.90
 -12   4   2   26.50    4.50
 -13   9   2   12.40    3.20
  -1  10  -2   46.40    5.80
  -9  -1  -2   30.40    3.90
  10  -9  -2   42.50    4.80
  -9  -1  -2   35.60    4.70
 -10   9   2   36.70    4.90
   1 -10   2   38.00    5.00
   7  -9  -2  385.66   21.90
   2   7  -2  392.16   22.50
  -9   2  -2  406.56   21.60
  -9   2  -2  417.46   22.00
  -9   2  -2  407.86   22.00
  -9   2  -2  351.76   21.30
  -7   9   2  378.56   22.30
  -2  -7   2  384.06   21.90
  -9   5  -2   35.10    3.90
   5   4  -2   36.70    3.40
   4  -9  -2   47.50    4.20
  -9   5  -2   32.20    4.00
  -5  -4   2   36.40    3.40
  -4   9   2   48.80    4.50
  -5  -4   2   36.10    3.50
   9  -5   2   35.30    3.20
   9  -5   2   42.20    4.30
   1  -9  -2  222.58   14.00
  -9   8  -2  234.88   13.80
  -8  -1   2  226.88   13.10
  -8  -1   2  221.68   13.90
   9  -8   2  239.78   13.80
   9  -8   2  238.88   13.40
  -1   9   2  218.98   14.40
  -8  -1   2  204.58   13.00
  -2  -9  -2   16.20    3.30
  -9  11  -2   20.20    3.80
   9 -11   2   26.60    4.10
 -11   2   2   19.50    3.40
 -11   2   2   31.70    4.70
  -2  12  -2   25.60    6.80
 -10  -2  -2   19.20    3.30
 -10  -2  -2   29.70    4.60
 -12  10   2   26.70    4.40
 -10   1  -2   36.30    4.20
   9 -10  -2   35.70    4.60
   1   9  -2   35.50    5.00
 -10   1  -2   51.09    4.80
  -9  10   2   48.00    5.70
  -1  -9   2   36.80    4.80
   4   6  -2   55.59    5.30
 -10   4  -2   52.19    4.80
 -10   4  -2   51.59    4.50
   6 -10  -2   42.50    5.10
  -6  10   2   50.69    5.10
  10  -4   2   45.00    4.20
 -10   7  -2  276.27   17.80
   3 -10  -2  293.67   18.20
  10  -7   2  335.17   18.00
  -7  -3   2  321.77   17.60
  -3  10   2  325.07   18.90
  10  -7   2  300.17   17.30
  -7  -3   2  320.97   18.40
   0 -10  -2   21.50    3.70
 -10  10  -2   33.20    4.50
 -10   0   2   30.10    4.60
  10 -10   2   29.80    4.10
   0  10   2   32.30    5.00
 -10  13  -2    0.20    1.40
 -13   3   2   -1.10    1.60
 -13   3   2    0.20    1.00
 -11   0  -2   37.10    5.00
   0  11  -2   42.90    7.40
 -11   0  -2   38.30    4.50
  11 -11  -2   34.00    4.60
   0 -11   2   32.40    4.70
 -11  11   2   22.30    4.10
   3   8  -2   76.69    6.90
 -11   3  -2   76.09    6.50
 -11   3  -2   74.09    5.80
   8 -11  -2   73.29    6.40
  -3  -8   2   76.39    6.30
  -8  11   2   71.79    6.70
   6   5  -2   29.80    4.50
 -11   6  -2   39.60    4.80
   5 -11  -2   46.50    5.40
  -5  11   2   32.50    4.90
  11  -6   2   28.30    4.10
  -6  -5   2   39.70    4.70
 -11   9  -2   22.10    3.80
   2 -11  -2   30.70    6.80
  -9  -2   2   18.40    3.00
  11  -9   2   22.20    3.70
  -2  11   2   35.90    5.50
  -9  -2   2   23.60    4.10
 -11  12  -2   21.40    3.90
 -12   1   2   17.90    3.00
 -12   1   2   24.30    4.50
 -12   2  -2   24.10    4.30
 -12   2  -2   31.50    4.00
  10 -12  -2   21.50    4.00
  -2 -10   2   25.70    4.30
 -10  12   2   35.40    5.10
   5   7  -2    0.60    1.60
 -12   5  -2    0.70    1.40
   7 -12  -2    0.50    1.30
  -7  12   2    0.80    1.70
  -5  -7   2   -0.90    0.90
  12  -5   2   -1.00    0.90
 -12   8  -2   32.50    4.40
   4 -12  -2   31.00    4.60
  -8  -4   2   28.10    4.50
  -8  -4   2   26.80    3.70
  -4  12   2   23.50    4.50
  12  -8   2   30.10    4.10
 -12  11  -2   19.80    3.80
 -11  -1   2   25.40    3.60
 -13   4  -2   13.30    3.30
 -13   4  -2   10.70    2.40
  -9  13   2   12.80    3.50
  -4  -9   2    8.10    2.50
 -13   7  -2    3.80    1.90
  -7  -6   2    1.30    1.40
  -6  13   2    0.20    1.40
  13  -7   2   -0.70    0.90
 -13  10  -2    0.60    1.20
 -10  -3   2    0.00    1.00
 -14   6  -2    1.20    1.40
  -9  -5   2   17.30    3.40
   0   0  -3    0.00    0.10
   0   0   3    0.00    0.10
  -1   2  -3   75.49    4.30
  -1  -1  -3   74.39    4.30
   2  -1  -3   78.59    4.40
  -1   2  -3   79.69    4.40
   2  -1  -3   70.99    4.10
   1   1   3   72.69    4.30
  -2   1   3   77.69    4.40
  -2   1   3   76.09    4.10
   1   1   3   87.49    4.50
   1  -2   3   78.49    4.30
   1   1  -3   76.39    4.10
   1  -2  -3   76.49    4.40
  -2   1  -3   75.39    4.10
  -2   1  -3   73.69    4.30
   1  -2  -3   75.99    4.30
   2  -1   3   78.99    4.00
   2  -1   3   75.59    4.30
  -1   2   3   75.39    4.40
  -1  -1   3   75.79    4.10
  -1   2   3   80.39    4.30
  -1  -1   3   68.79    4.30
   4  -2  -3   13.30    1.70
  -2  -2  -3   13.30    1.60
  -2   4  -3   12.20    1.60
  -2   4  -3   17.30    2.00
   4  -2  -3   10.10    1.30
   2   2   3    9.20    1.50
  -4   2   3   11.70    1.40
   2   2   3   13.60    1.60
   2  -4   3   13.70    1.80
   2  -4   3   10.80    1.60
  -4   2   3   15.60    1.90
   3  -3  -3    3.30    0.80
   3  -3  -3    9.40    1.40
   0   3  -3    8.20    1.40
   0   3  -3    3.40    0.80
  -3   3   3    9.80    1.40
   0  -3   3    9.70    1.40
  -3   3  -3    0.00    0.30
   0  -3  -3    0.50    0.50
  -3   3  -3    0.00    0.40
   0  -3  -3    1.60    0.70
  -3   0   3   -0.30    0.40
   0   3   3    0.20    0.40
   3  -3   3    0.20    0.40
  -3   0   3    0.00    0.20
  -3   0   3    0.10    0.30
   0   3   3   -0.50    0.40
  -3   0   3   -0.10    0.30
   3  -3   3    0.20    0.40
  -3   6  -3   34.60    3.20
   6  -3  -3   43.00    3.10
  -3  -3  -3   29.50    3.20
   6  -3  -3   38.10    2.80
  -3  -3  -3   35.10    3.00
  -3   6  -3   33.70    3.20
  -6   3   3   42.10    3.40
   3  -6   3   32.20    3.10
   3   3   3   33.80    3.20
   3  -6   3   44.10    4.20
   3   3   3   31.80    2.80
  -6   3   3   34.20    2.70
  -4  -1  -3  655.53   36.40
  -4  -1  -3  718.93   36.30
   5  -4  -3  614.14   36.20
   5  -4  -3  749.82   36.20
  -1   5  -3  727.23   36.40
  -4  -1  -3  721.33   36.20
   1  -5   3  728.13   36.50
  -5   4   3  738.03   36.20
  -5   4   3  712.43   36.60
   4   1   3  672.13   36.40
   1  -5   3  695.03   36.60
  -4   2  -3    9.90    1.40
   2   2  -3   15.90    2.00
  -4   2  -3   13.90    1.50
   2  -4  -3   14.20    1.80
   2   2  -3   14.50    1.50
  -2   4   3   13.50    2.00
  -2  -2   3   10.20    1.60
  -2   4   3   13.10    1.70
   4  -2   3   11.80    1.50
   4  -2   3   12.00    1.20
  -2  -2   3   10.30    1.30
  -1  -4  -3   85.89    5.90
  -4   5  -3   87.99    5.60
   5  -1  -3   85.79    5.20
  -4   5  -3   81.69    5.50
  -1  -4  -3   81.89    5.50
  -5   1   3   87.39    5.10
   4  -5   3   78.19    5.70
  -5   1   3  113.89    6.30
  -5   1   3   88.39    5.60
   1   4   3   85.89    5.40
   4  -5   3   85.79    5.60
   1   4   3   80.99    5.80
  -4  -4  -3  203.38   12.00
   8  -4  -3  187.48   11.10
  -4  -4  -3  196.28   11.30
  -4   8  -3  166.28   11.40
   8  -4  -3  202.68   11.00
   4   4   3  201.98   11.90
   4  -8   3  178.38   12.10
  -8   4   3  177.18   11.50
   4   4   3  186.98   11.10
  -8   4   3  195.18   11.00
   4  -8   3  185.58   11.50
  -2   7  -3  216.88   12.80
  -5  -2  -3  197.98   12.60
  -2   7  -3  225.98   12.60
   7  -5  -3  212.98   12.30
   7  -5  -3  225.38   12.30
  -5  -2  -3  216.58   12.30
  -5  -2  -3  211.38   12.30
   2  -7   3  228.48   13.00
   5   2   3  204.48   12.60
   2  -7   3  215.38   12.60
  -7   5   3  219.08   12.70
  -7   5   3  214.48   12.30
   4  -5  -3  720.53   37.80
   1   4  -3  721.53   37.10
  -5   1  -3  701.83   37.20
   1   4  -3  699.93   37.60
  -5   1  -3  733.23   37.20
   4  -5  -3  742.43   37.60
  -4   5   3  682.73   37.60
  -1  -4   3  801.52   37.90
  -4   5   3  686.03   37.20
  -1  -4   3  733.63   37.30
  -5   4  -3   93.49    5.50
   4   1  -3   87.09    5.70
   1  -5  -3   84.19    5.60
  -5   4  -3   82.59    5.50
   1  -5  -3   80.29    5.80
   5  -4   3   90.69    5.80
  -4  -1   3   86.59    5.20
   5  -4   3   90.19    5.30
  -4  -1   3   77.79    5.60
  -1   5   3   81.59    5.50
  -4  -1   3   86.19    5.60
  -1   5   3   86.59    5.90
  -4  -1   3   93.09    5.20
  -2  -5  -3   -0.10    0.80
  -2  -5  -3    1.70    1.00
  -5   7  -3    1.00    0.90
   7  -2  -3    0.10    0.60
  -5   7  -3    0.00    0.70
   2   5   3   -0.50    0.90
   5  -7   3    1.00    1.00
  -7   2   3    1.10    0.90
  -7   2   3   -0.30    0.40
  -7   2   3    0.80    0.90
   2   5   3   -0.20    0.60
   5  -7   3    0.50    0.80
  10  -5  -3    2.20    1.20
  -5  10  -3    3.30    1.70
  -5  -5  -3    4.90    1.60
   5 -10   3    2.80    1.50
 -10   5   3    0.50    1.30
   5   5   3    3.10    1.70
 -10   5   3    2.60    1.20
  -3   9  -3   10.10    2.40
  -6  -3  -3    6.90    1.80
   9  -6  -3   13.80    2.30
   9  -6  -3   10.70    2.00
  -6  -3  -3   11.10    2.40
   3  -9   3   15.40    2.90
  -9   6   3    9.00    2.00
  -9   6   3   11.30    2.50
   6   3   3    8.30    2.20
   0   6  -3    4.80    1.20
  -6   0  -3    0.90    0.80
   0   6  -3    7.80    1.80
   6  -6  -3    5.30    1.40
   6  -6  -3    7.20    1.70
   0  -6   3    8.90    2.00
  -6   6   3    5.50    1.30
   0  -6   3    3.80    1.10
   3  -6  -3   35.30    3.20
   3   3  -3   36.70    2.90
   3  -6  -3   37.40    3.40
   3   3  -3   35.40    3.40
  -6   3  -3   36.70    3.10
  -6   3  -3   38.20    3.10
  -3   6   3   41.90    3.60
  -3  -3   3   34.90    3.40
  -3   6   3   34.10    3.10
  -3  -3   3   40.70    3.00
   6  -3   3   38.10    3.10
   6  -3   3   39.60    2.80
  -6   6  -3    1.50    0.90
  -6   6  -3    2.50    1.00
   0  -6  -3    3.70    1.30
   6  -6   3    1.10    0.80
  -6   0   3    0.70    0.60
   6  -6   3    3.60    1.20
  -6   0   3    1.00    0.80
  -6   0   3    0.70    0.80
   0   6   3    0.40    0.70
   0   6   3    1.70    1.10
  -6   0   3   -0.10    0.40
  -6   9  -3    0.70    1.10
  -3  -6  -3    1.20    1.10
   9  -3  -3    0.20    0.80
  -9   3   3    0.30    1.20
   6  -9   3    0.60    1.00
  -9   3   3   -0.50    0.60
   3   6   3    1.70    1.30
  -9   3   3    0.30    1.10
   6  -9   3    0.40    1.00
  12  -6  -3   11.50    2.40
  -6  -6  -3   15.50    3.00
  -6  12  -3    7.50    2.50
   6   6   3   11.60    4.50
   6 -12   3   12.20    2.80
 -12   6   3   12.30    3.10
  11  -7  -3  100.79    6.80
  -7  -4  -3   84.59    6.70
  -4  11  -3   97.69    7.60
   4 -11   3   89.89    7.40
 -11   7   3   82.39    7.20
   7   4   3   82.69    7.30
  -7  -1  -3    5.20    1.60
   8  -7  -3    2.50    1.20
  -7  -1  -3    4.50    1.60
  -1   8  -3    3.00    1.60
  -7  -1  -3    4.50    1.40
   8  -7  -3    4.10    1.40
  -7  -1  -3    4.40    1.70
  -8   7   3    2.50    1.50
   1  -8   3    2.70    1.30
  -8   7   3    2.20    1.20
   5  -7  -3  230.98   12.70
   5  -7  -3  228.78   12.90
  -7   2  -3  225.08   12.50
   2   5  -3  197.18   12.80
  -7   2  -3  221.68   12.40
  -7   2  -3  229.88   12.50
   2   5  -3  195.78   12.10
   7  -2   3  215.78   12.40
  -2  -5   3  215.18   13.10
  -2  -5   3  208.58   12.40
  -5   7   3  216.18   12.90
   5   2  -3    0.50    0.90
  -7   5  -3    0.40    0.80
   2  -7  -3    0.60    0.90
  -7   5  -3    0.40    0.70
   2  -7  -3   -0.30    0.80
   7  -5   3   -0.20    0.50
  -5  -2   3    0.80    1.00
  -5  -2   3    0.50    0.60
  -2   7   3    0.30    0.70
  -2   7   3   -0.30    0.70
  -5  -2   3    0.60    0.60
   7  -5   3    1.60    0.90
  -1  -7  -3  144.39    9.90
  -7   8  -3  161.38    9.90
   7  -8   3  151.58    9.70
  -8   1   3  170.28   10.20
  -8   1   3  136.79    9.10
   7  -8   3  159.88   10.00
   1   7   3  145.99   10.40
  -8   1   3  165.18   10.20
  -8   1   3  166.78    9.30
  -7  11  -3    2.70    1.80
  -4  -7  -3    7.80    2.20
  11  -4  -3    5.60    1.70
 -11   4   3    6.50    2.30
   7 -11   3    4.40    2.00
   4   7   3    7.70    2.40
 -14   7   3    6.20    2.30
  -5  13  -3    0.60    1.70
  -8  -5  -3    4.20    2.10
  13  -8  -3    4.70    1.80
 -13   8   3    8.30    2.50
  10  -8  -3    9.80    2.20
  -8  -2  -3   13.20    2.50
  -8  -2  -3   10.90    2.50
  -2  10  -3    6.20    2.40
 -10   8   3    8.20    2.60
   2 -10   3   11.40    2.70
   7  -8  -3    1.50    1.20
   7  -8  -3    3.00    1.50
  -8   1  -3    3.00    1.30
  -8   1  -3    2.90    1.30
  -8   1  -3    2.00    1.10
  -8   1  -3    3.30    1.40
   1   7  -3    2.50    1.40
  -7   8   3    1.60    1.30
  -1  -7   3    2.50    1.20
  -8   4  -3  169.48   11.10
   4   4  -3  200.78   11.00
   4  -8  -3  193.08   11.50
   4   4  -3  212.08   12.00
   4  -8  -3  177.18   11.70
  -8   4  -3  190.38   12.80
  -8   4  -3  186.18   11.00
   8  -4   3  179.98   11.10
  -4  -4   3  187.18   11.00
  -4  -4   3  196.68   13.70
  -4   8   3  194.78   12.00
   8  -4   3  190.58   10.80
  -4   8   3  187.88   12.00
   1  -8  -3  151.28    9.70
  -8   7  -3  148.19    9.40
   8  -7   3  140.39    9.00
  -1   8   3  152.78   10.10
   8  -7   3  142.39    9.40
  -7  -1   3  147.99    8.90
  -7  -1   3  158.38    9.80
  -7  -1   3  150.78    9.00
  -8  10  -3    5.20    1.90
  -2  -8  -3    4.20    1.90
 -10   2   3    1.90    1.10
   2   8   3    6.70    2.30
   8 -10   3    4.10    1.70
 -10   2   3    4.40    1.40
 -10   2   3    5.40    2.00
  -8  13  -3    1.20    2.40
  -5  -8  -3    1.80    1.70
 -13   5   3   -0.10    1.60
 -13   5   3    2.30    1.30
  -9  -3  -3   -0.70    1.10
  12  -9  -3    1.10    1.30
  -9  -3  -3    1.00    1.10
  -3  12  -3   -1.10    1.20
   3 -12   3    1.00    1.40
 -12   9   3    0.20    1.30
  -9   0  -3    0.60    0.90
   9  -9  -3   -1.00    0.70
   0   9  -3    1.00    1.20
  -9   0  -3   -0.70    0.80
   0  -9   3   -0.20    1.00
  -9   9   3    0.70    1.20
  -9   3  -3   10.00    2.30
   6  -9  -3   12.30    3.20
  -9   3  -3   10.50    2.10
   3   6  -3    9.60    2.50
  -9   3  -3   12.20    2.30
  -6   9   3   11.30    2.60
   9  -3   3    9.80    1.90
  -3  -6   3    8.70    2.10
  -9   6  -3    2.60    1.30
   3  -9  -3    0.60    1.10
   6   3  -3   -0.20    1.20
   9  -6   3    2.30    0.90
   9  -6   3    0.20    0.90
  -6  -3   3    1.60    0.80
  -6  -3   3    1.10    0.90
  -6  -3   3   -0.10    1.00
  -3   9   3    1.30    2.80
  -9   9  -3    0.20    1.00
   0  -9  -3    4.70    1.80
   9  -9   3    0.80    1.30
  -9   0   3    1.40    1.00
  -9   0   3    0.10    0.70
   0   9   3    2.00    1.60
  -9   0   3    2.60    1.60
   9  -9   3    0.20    1.00
  -9  12  -3    5.50    2.10
  -3  -9  -3    4.60    2.00
 -12   3   3    2.90    1.40
   9 -12   3    4.90    2.30
 -12   3   3    3.00    2.20
   3   9   3    4.00    2.20
  -1  11  -3    6.00    2.40
 -10  -1  -3    5.10    1.70
  11 -10  -3    5.20    2.00
 -10  -1  -3    6.60    2.30
 -11  10   3    8.00    2.50
   1 -11   3    5.80    2.20
   2   8  -3   11.10    2.90
 -10   2  -3    8.50    2.70
   8 -10  -3    7.40    2.20
  -8  10   3   11.40    2.70
  -2  -8   3   10.70    2.40
   5 -10  -3    5.40    1.90
 -10   5  -3    3.60    1.40
   5   5  -3    6.10    2.30
 -10   5  -3    2.10    1.30
  10  -5   3    5.00    1.70
  -5  10   3    5.50    2.10
  -5  -5   3    4.10    1.40
   2 -10  -3    3.60    1.80
 -10   8  -3    2.90    1.60
  10  -8   3    5.70    1.70
  10  -8   3    2.80    1.30
  -2  10   3    6.50    2.30
  -8  -2   3    4.10    1.40
  -8  -2   3    3.20    1.70
 -10  11  -3   11.30    2.80
  -1 -10  -3   13.00    3.00
 -11   1   3    8.30    2.60
   1  10   3    7.90    2.80
 -11   1   3    7.60    1.90
  10 -11   3    8.50    2.80
 -11  -2  -3    0.70    1.30
 -13  11   3   -0.30    1.30
 -11   1  -3    7.00    2.40
   1  10  -3   10.50    3.00
 -11   1  -3    5.50    1.70
  10 -11  -3    8.10    2.40
  -1 -10   3    5.60    2.70
 -10  11   3    6.70    2.40
   4   7  -3   77.69    7.20
   7 -11  -3   89.59    7.10
  11  -4   3   82.59    6.40
  -4  -7   3   74.89    6.50
  -7  11   3  106.69    7.80
 -11   7  -3    6.10    1.90
   4 -11  -3    5.80    2.20
  11  -7   3    6.60    2.00
  -4  11   3    5.10    2.30
  -7  -4   3    2.70    2.00
  -7  -4   3    4.70    1.70
   1 -11  -3    7.30    2.30
 -11  10  -3    5.40    1.90
  -1  11   3    5.50    2.40
 -10  -1   3    8.60    2.00
 -10  -1   3    9.50    2.70
  11 -10   3    7.20    2.20
 -11  13  -3   -1.00    1.20
 -12   0  -3    2.10    1.60
 -12  12   3    2.40    2.20
 -12   3  -3   -0.60    1.20
   3   9  -3   -0.10    1.40
   9 -12  -3    1.60    1.60
 -12   3  -3    1.60    1.20
  -9  12   3   -0.20    1.30
  -3  -9   3   -0.50    1.10
   6 -12  -3   12.50    3.00
 -12   6  -3    9.70    2.60
   6   6  -3   11.10    2.90
  12  -6   3   11.70    2.50
  -6  -6   3   15.00    2.90
  -6  12   3   11.20    3.00
   3 -12  -3    4.80    2.20
 -12   9  -3    4.80    1.80
  -9  -3   3    2.50    1.40
  12  -9   3    2.80    1.60
  -3  12   3    3.50    2.20
  -9  -3   3    4.30    2.20
 -12  12  -3    0.70    1.40
 -13   2  -3    1.70    2.00
 -13   2  -3    2.00    1.40
 -13   5  -3    6.90    2.30
 -13   5  -3    2.70    1.90
  -8  13   3    8.30    2.90
  -5  -8   3    2.00    1.50
 -13   8  -3    3.20    1.60
  -8  -5   3    2.30    1.50
  13  -8   3    0.90    1.30
 -14   4  -3    1.20    2.20
  14  -7   3   11.70    2.90
  -7  -7   3    5.90    2.30
  -1   0  -4 3328.77  176.18
   0   1  -4 3657.73  177.18
   0   1  -4 3711.03  178.38
   1  -1  -4 3381.36  177.28
  -1   0  -4 3350.86  176.28
   0  -1   4 3543.75  178.18
  -1   1   4 3767.82  179.08
   1   0   4 3047.99  176.08
   0  -1   4 3627.04  177.18
   1   0   4 3296.27  176.08
  -1   1   4 3524.85  177.58
  -1   3  -4 2413.36  124.69
  -2  -1  -4 2336.07  119.09
   3  -2  -4 2358.96  120.49
  -2  -1  -4 2338.07  117.79
   3  -2  -4 2166.08  121.79
  -3   2   4 2125.59  122.39
   2   1   4 2244.38  117.29
   1  -3   4 2091.39  123.59
  -3   2   4 2540.15  121.19
   2   1   4 2270.47  117.49
   1  -3   4 2277.57  122.19
  -2   2  -4   21.40    1.40
  -2   2  -4   23.50    1.70
   0  -2  -4   20.00    1.70
   0  -2  -4   22.30    1.70
  -2   0   4   17.60    1.60
   0   2   4   23.10    1.80
  -2   0   4   18.90    1.30
  -2   0   4   20.20    1.70
  -2   0   4   21.50    1.30
   0   2   4   18.80    1.50
   2  -2   4   21.00    1.60
   2  -2   4   23.20    1.50
  -3  -2  -4  826.22   45.40
   3   2   4  941.31   45.30
  -3   1  -4 2318.47  119.99
  -3   1  -4 2360.86  120.69
   2  -3  -4 2301.57  128.29
   1   2  -4 2460.55  124.39
   2  -3  -4 2222.18  125.29
   1   2  -4 2425.86  123.09
  -2   3   4 2243.48  127.89
   3  -1   4 2259.97  119.89
  -1  -2   4 2377.66  127.59
  -1  -2   4 2312.27  122.79
   3  -1   4 2340.57  119.39
  -2   3   4 2477.05  125.59
   4  -1  -4  163.18    8.90
   4  -1  -4  164.88    8.50
  -3   4  -4  158.68    8.80
  -1  -3  -4  157.68    8.90
  -1  -3  -4  141.89    9.00
  -3   4  -4  160.98    9.00
  -4   1   4  149.69    8.90
   3  -4   4  154.68    8.90
  -4   1   4  162.68    8.50
   1   3   4  159.38    9.10
   3  -4   4  165.68    8.90
   1   3   4  151.28    8.80
  -4  -3  -4   98.99    6.80
   7  -4  -4  112.89    6.90
   7  -4  -4  107.59    6.60
  -4  -3  -4  103.59    7.30
  -3   7  -4  101.09    7.00
  -3   7  -4   95.09    7.00
   4   3   4  120.09    7.40
   3  -7   4   95.89    7.10
  -7   4   4  105.49    6.60
  -7   4   4  112.19    7.30
   4   3   4  115.39    6.90
   3  -7   4  116.29    7.20
   4  -4  -4  855.31   58.39
   0   4  -4  858.01   54.79
   4  -4  -4  892.31   55.19
   0  -4   4  895.11   58.09
   0  -4   4  955.30   55.99
  -4   4   4  966.70   56.29
  -4   4   4  902.11   59.39
   3   1  -4  190.28    9.40
   3   1  -4  145.09    8.60
   1  -4  -4  160.68    9.10
   1  -4  -4  145.19    9.20
  -4   3  -4  152.28    8.90
  -4   3  -4  148.09    8.70
   4  -3   4  146.29    8.60
  -3  -1   4  166.38    9.20
  -3  -1   4  176.98    8.60
  -1   4   4  164.98    9.00
  -1   4   4  173.48    9.40
   4  -3   4  159.58    9.00
   6  -2  -4  684.23   35.30
  -4   6  -4  731.23   36.50
  -2  -4  -4  601.94   36.00
   6  -2  -4  759.82   35.80
  -4   6  -4  686.03   35.90
  -2  -4  -4  681.63   35.80
   4  -6   4  717.73   36.00
   2   4   4  686.13   35.70
  -6   2   4  650.53   35.30
  -6   2   4  736.53   36.10
   4  -6   4  683.13   35.90
   2   4   4  635.84   36.10
   9  -5  -4   89.39    6.80
  -5  -4  -4  102.59    7.20
   9  -5  -4  117.89    7.00
  -4   9  -4  114.09    7.80
   5   4   4  100.69    7.60
  -9   5   4  108.29    7.80
   4  -9   4  114.59    7.70
   6  -5  -4    4.90    1.20
  -5  -1  -4    7.40    1.40
  -1   6  -4    6.90    1.60
   6  -5  -4    6.00    1.50
  -5  -1  -4    7.40    1.40
  -1   6  -4    3.70    1.20
  -5  -1  -4    8.10    1.70
  -6   5   4    9.20    1.90
   1  -6   4    4.50    1.20
   1  -6   4    4.50    1.50
   5   1   4   10.90    1.90
  -6   5   4    6.70    1.40
   3  -5  -4 1020.50   64.19
  -5   2  -4 1037.80   58.09
   2   3  -4  955.80   60.49
   2   3  -4  942.51   58.59
   3  -5  -4 1034.80   68.29
  -5   2  -4 1026.80   56.89
  -3   5   4 1111.89   65.59
  -2  -3   4 1061.69   62.79
   5  -2   4 1032.40   56.09
   5  -2   4 1042.50   54.99
  -3   5   4 1112.59   69.49
  -2  -3   4 1059.29   60.19
  -5   5  -4  488.45   27.10
  -5   5  -4  506.35   26.90
   0  -5  -4  544.95   27.60
   0  -5  -4  518.65   27.20
  -5   0   4  527.05   26.60
  -5   0   4  506.95   27.10
  -5   0   4  562.14   27.40
   0   5   4  550.74   27.70
   5  -5   4  530.45   27.20
   0   5   4  482.95   26.90
  -5   0   4  443.26   26.40
  -5   8  -4   28.00    3.50
   8  -3  -4   24.70    2.80
  -3  -5  -4   25.10    3.20
  -8   3   4   28.20    2.50
   5  -8   4   29.50    3.70
  -8   3   4   23.10    3.30
   3   5   4   24.70    3.10
   5  -8   4   21.60    3.10
  -8   3   4   24.60    3.40
   3   5   4   26.00    3.50
  11  -6  -4   76.69    5.80
  -6  -5  -4   73.59    6.20
  -5  11  -4   82.79    6.80
   6   5   4   73.69    6.70
 -11   6   4   78.49    6.80
   5 -11   4   77.29    6.60
  -6  -2  -4  229.48   14.10
  -6  -2  -4  251.27   14.10
  -2   8  -4  217.98   14.50
   8  -6  -4  270.97   14.20
   8  -6  -4  231.28   14.10
  -6  -2  -4  241.48   14.60
  -8   6   4  268.97   14.90
   2  -8   4  238.28   14.80
   6   2   4  255.97   14.60
  -8   6   4  252.37   14.60
   2  -8   4  261.37   14.60
   5  -6  -4    4.50    1.20
   1   5  -4    7.40    1.40
   5  -6  -4    6.70    1.70
  -6   1  -4    7.00    1.40
  -6   1  -4    7.20    1.50
   1   5  -4   13.40    2.40
  -6   1  -4    9.00    1.60
  -1  -5   4    5.30    1.50
  -1  -5   4    6.50    1.40
   6  -1   4    7.60    1.50
  -5   6   4    6.70    1.50
  -5   6   4    5.20    1.60
  -6   4  -4  682.93   35.50
   2  -6  -4  639.94   35.90
   2  -6  -4  689.93   35.60
  -6   4  -4  677.23   35.30
   4   2  -4  678.63   35.00
   4   2  -4  701.33   35.90
  -2   6   4  694.23   36.00
  -4  -2   4  685.93   35.10
  -4  -2   4  611.14   35.70
   6  -4   4  741.83   35.40
  -2   6   4  661.73   35.50
   6  -4   4  702.73   35.50
  -1  -6  -4    3.30    1.50
  -6   7  -4    2.80    1.10
  -1  -6  -4    2.20    1.10
  -6   7  -4    3.90    1.30
   6  -7   4    4.60    1.50
  -7   1   4    5.50    1.80
   1   6   4    4.50    1.40
  -7   1   4    4.90    1.10
   1   6   4    5.90    1.70
  -7   1   4    5.30    1.20
   6  -7   4    3.40    1.20
  -6  10  -4  260.07   15.00
  10  -4  -4  250.27   13.90
  -4  -6  -4  237.78   14.60
   4   6   4  228.08   15.00
   6 -10   4  249.48   14.90
 -10   4   4  226.08   13.80
  -6  13  -4   10.80    3.10
  13  -7  -4   13.00    2.70
  -7  -6  -4    9.30    2.60
 -13   7   4   13.50    3.40
  10  -7  -4  222.08   13.70
  -3  10  -4  253.47   14.90
  -7  -3  -4  234.08   13.90
   7   3   4  224.08   14.40
 -10   7   4  245.48   15.80
   3 -10   4  219.48   14.30
   0   7  -4  180.98   10.60
  -7   0  -4  140.19    9.80
   7  -7  -4  153.88    9.70
  -7   0  -4  162.68    9.70
   7  -7  -4  173.08   10.20
  -7   0  -4  154.28    9.70
  -7   0  -4  160.98    9.80
   0   7  -4  154.18    9.70
   0  -7   4  142.29   10.70
   0  -7   4  168.18   10.00
  -7   7   4  147.39    9.70
  -7   7   4  180.48   10.50
   3   4  -4  106.99    6.60
  -7   3  -4  101.79    6.60
  -7   3  -4  113.69    6.90
   4  -7  -4  111.89    7.10
   4  -7  -4   96.69    7.20
   3   4  -4  102.19    7.20
  -3  -4   4  105.59    6.70
   7  -3   4  112.09    6.90
  -3  -4   4  105.29    7.40
  -4   7   4  113.39    7.50
   1  -7  -4    1.20    1.00
  -7   6  -4    3.80    1.30
   1  -7  -4    3.20    1.30
  -7   6  -4    3.50    1.30
  -6  -1   4    3.80    1.40
  -6  -1   4    4.50    1.40
  -1   7   4    4.50    1.70
   7  -6   4    6.10    1.40
   7  -6   4    3.40    1.20
  -1   7   4    1.50    1.00
  -6  -1   4    5.30    1.20
  -6  -1   4    2.60    0.90
  -7   9  -4   71.39    5.80
  -2  -7  -4   72.59    5.90
   2   7   4   72.19    6.30
   7  -9   4   80.19    6.10
  -9   2   4   65.99    5.10
  -9   2   4   92.29    6.50
  -9   2   4   73.89    5.20
   7  -9   4   71.19    5.80
  -7  12  -4  130.99    9.50
  -5  -7  -4  127.89    9.10
  12  -5  -4  110.99    8.10
   7 -12   4  120.39    9.30
 -12   5   4  126.49    9.70
   5   7   4  126.79    9.80
  -8  -4  -4   39.40    4.80
  12  -8  -4   37.80    4.40
  -4  12  -4   51.29    6.90
 -12   8   4   35.20    5.10
   4 -12   4   43.10    5.60
  -8  -1  -4  118.09    9.40
  -8  -1  -4  133.89    8.50
   9  -8  -4  139.29    8.80
  -1   9  -4  119.09    9.20
   1  -9   4  130.19    9.00
  -9   8   4  143.49    9.50
   2   6  -4  227.18   13.90
   2   6  -4  247.68   14.80
  -8   2  -4  269.17   14.30
   6  -8  -4  261.67   14.80
   6  -8  -4  259.87   14.50
  -8   2  -4  240.28   14.10
  -8   2  -4  238.28   14.10
  -6   8   4  222.38   14.60
  -2  -6   4  248.78   14.30
   8  -2   4  261.37   14.20
  -6   8   4  230.48   14.90
   3  -8  -4   27.70    3.90
  -8   5  -4   29.40    3.50
   5   3  -4   26.50    3.80
  -8   5  -4   29.10    3.40
   3  -8  -4   30.70    3.70
   8  -5   4   24.40    2.40
  -3   8   4   29.20    4.10
   8  -5   4   23.30    3.10
  -5  -3   4   29.20    3.20
  -5  -3   4   28.70    3.20
   0  -8  -4    4.30    1.70
  -8   8  -4    1.50    1.10
   8  -8   4    1.00    1.30
  -8   0   4    1.50    0.90
   8  -8   4    2.40    1.20
  -8   0   4    3.60    1.50
  -8   0   4    2.50    1.00
   0   8   4    2.20    1.50
  -3  -8  -4  111.59    8.80
  -8  11  -4  131.59    9.00
   8 -11   4  122.89    9.00
   3   8   4  105.79    9.10
 -11   3   4  134.99    9.50
 -11   3   4  120.39    7.90
 -14   6   4   27.90    7.20
  14  -9  -4    9.70    2.60
 -14   9   4   11.60    3.30
  11  -9  -4   27.60    3.90
  -9  -2  -4   30.50    4.30
  -2  11  -4   27.90    4.60
  -9  -2  -4   33.30    4.20
   2 -11   4   32.30    4.50
 -11   9   4   29.50    4.60
   8  -9  -4  148.89    9.50
  -9   1  -4  143.09    9.10
   1   8  -4  139.79    9.90
  -9   1  -4  139.89    9.30
  -8   9   4  141.59   10.30
  -1  -8   4  131.29    9.30
  -9   4  -4   99.19    7.00
  -9   4  -4   99.39    7.10
  -9   4  -4  109.69    7.00
   4   5  -4   98.69    6.80
   5  -9  -4   87.29    7.90
   4   5  -4  113.39    7.80
  -5   9   4  116.59    8.10
  -4  -5   4  100.19    6.90
   9  -4   4  102.89    7.00
   2  -9  -4   69.59    5.80
  -9   7  -4   74.89    5.60
  -7  -2   4   69.99    5.50
  -7  -2   4   64.89    5.00
   9  -7   4   78.79    6.40
   9  -7   4   78.29    5.20
  -7  -2   4   74.39    5.90
  -2   9   4   59.19    5.90
  -1  -9  -4  124.59    9.00
  -9  10  -4  106.09    8.50
 -10   1   4  130.49    8.10
   1   9   4  113.39    9.30
 -10   1   4  125.49    9.20
   9 -10   4  128.69    9.00
 -10   1   4  137.69    8.10
  -9  13  -4    8.50    3.90
 -13   4   4    4.10    1.50
 -13   4   4    2.50    2.00
 -10  -3  -4   27.30    4.10
  13 -10  -4   26.60    4.10
 -13  10   4   30.10    5.00
 -10   0  -4   13.50    2.90
  10 -10  -4   15.80    3.10
 -10   0  -4   11.30    2.40
   0  10  -4    9.50    2.70
 -10  10   4   16.60    3.40
   0 -10   4   11.00    2.60
   3   7  -4  215.88   13.90
 -10   3  -4  191.08   12.90
   7 -10  -4  224.68   13.50
  -3  -7   4  215.48   13.10
  -7  10   4  205.38   13.70
  10  -3   4  237.48   13.20
 -10   6  -4  265.07   14.30
   4 -10  -4  230.78   14.40
   6   4  -4  248.58   14.90
  -6  -4   4  249.48   13.90
  -6  -4   4  205.08   14.00
  -4  10   4  223.88   14.90
  10  -6   4  230.48   13.30
  10  -6   4  221.18   13.90
   1 -10  -4  114.39    8.90
 -10   9  -4  116.29    8.50
  10  -9   4  129.99    8.90
  -1  10   4  144.49   10.00
  -9  -1   4  128.49    8.00
  -9  -1   4  113.49    8.90
 -10  12  -4    0.00    1.10
  -2 -10  -4    1.20    1.70
 -12   2   4    0.90    1.70
 -12   2   4    2.70    1.20
 -11  -1  -4    8.00    2.40
 -11  -1  -4   15.20    3.50
  12 -11  -4   12.80    2.90
 -11   2  -4   32.00    4.00
 -11   2  -4   25.60    4.20
   9 -11  -4   35.90    4.80
  -9  11   4   30.00    4.70
  -2  -9   4   28.00    4.20
 -11   5  -4   79.49    6.30
   6 -11  -4   87.29    6.90
   5   6  -4   72.69    6.80
  11  -5   4   82.39    6.30
  -6  11   4   71.39    6.80
  -5  -6   4   76.49    6.10
 -11   8  -4  117.49    8.40
   3 -11  -4  108.69    8.80
  -3  11   4  113.19    9.30
  -8  -3   4  119.89    8.80
  -8  -3   4  138.89    9.30
  11  -8   4  126.79    8.70
   0 -11  -4   34.10    5.60
 -11  11  -4   41.10    5.30
 -11   0   4   50.89    6.30
  11 -11   4   45.20    5.70
 -11   0   4   47.80    4.20
 -12   1  -4   19.60    3.30
 -12   1  -4   10.70    3.40
 -11  12   4    6.80    2.50
   8 -12  -4   42.70    5.60
 -12   4  -4   46.40    5.20
   4   8  -4   63.49    7.20
 -12   4  -4   43.80    5.50
  -4  -8   4   36.00    4.80
  -8  12   4   34.80    5.50
   5 -12  -4  108.59    8.70
 -12   7  -4  119.09    8.30
  -7  -5   4   90.49    8.30
  -7  -5   4  124.29    8.20
  12  -7   4  117.89    8.30
 -12  10  -4    0.50    1.00
  12 -10   4   -1.30    0.90
 -10  -2   4    0.50    0.90
 -10  -2   4    1.20    1.80
 -13   3  -4   26.10    5.60
 -13   3  -4   24.30    3.80
 -10  13   4   27.40    5.30
 -13   6  -4    7.40    2.40
  13  -6   4    9.80    2.60
  -7  13   4    6.40    2.70
  -6  -7   4    9.80    2.60
 -13   9  -4    7.90    2.30
  13  -9   4    4.80    2.10
  -9  -4   4    2.90    1.60
  -8  -6   4   36.80    4.80
   1   0  -5    0.30    0.30
   0  -1  -5   -0.10    0.30
  -1   1  -5   -0.10    0.20
  -1   1  -5    0.10    0.10
   0  -1  -5    0.00    0.20
  -1   0   5    0.10    0.30
   0   1   5   -0.20    0.30
   0   1   5    0.10    0.20
   1  -1   5    0.10    0.30
   1  -1   5    0.20    0.10
   0   2  -5   -0.40    0.30
   0   2  -5    0.10    0.40
  -2   0  -5    0.10    0.30
   2  -2  -5    0.00    0.60
   2  -2  -5    0.10    0.30
  -2   0  -5    0.40    0.40
  -2   2   5    0.30    0.30
   0  -2   5    0.20    0.40
   0  -2   5    0.00    0.30
   2   0   5   -0.60    0.30
  -2   2   5    0.20    0.60
   2   0   5    0.20    0.30
   3  -1  -5 1264.57   65.89
   3  -1  -5 1134.19   64.09
  -1  -2  -5 1259.07   68.59
  -2   3  -5 1138.59   67.59
  -1  -2  -5 1136.59   65.69
  -2   3  -5 1278.37   70.29
   1   2   5 1258.67   67.59
  -3   1   5 1167.08   65.29
   1   2   5 1157.28   65.29
   2  -3   5 1195.78   69.59
   2  -3   5 1214.88   68.19
  -3  -1  -5  128.09    7.40
   4  -3  -5  131.19    7.10
  -3  -1  -5  116.69    7.30
   4  -3  -5  119.89    7.40
  -1   4  -5  131.39    7.50
  -1   4  -5  130.19    7.40
  -3  -1  -5  118.19    7.20
   1  -4   5  123.69    7.30
   1  -4   5  130.59    7.80
   3   1   5  117.99    7.30
  -4   3   5  149.79    7.80
  -4   3   5  128.79    7.10
   2   1  -5 1288.57   64.59
  -3   2  -5 1214.58   65.39
  -3   2  -5 1160.78   66.79
   1  -3  -5 1171.68   68.39
   2   1  -5 1169.38   65.49
   1  -3  -5 1065.89   70.39
  -2  -1   5 1193.78   64.69
  -1   3   5 1285.17   68.99
   3  -2   5 1231.48   65.19
   3  -2   5 1111.49   66.09
  -2  -1   5 1267.87   66.39
  -1   3   5 1223.78   71.19
  -2  -3  -5  189.08   10.30
   5  -2  -5  174.28   10.10
  -3   5  -5  168.88   10.10
   5  -2  -5  190.88    9.80
  -2  -3  -5  172.58   10.40
  -3   5  -5  186.48   10.30
   2   3   5  171.68   10.80
   2   3   5  173.28   10.00
  -5   2   5  182.58   10.30
   3  -5   5  181.58   10.30
  -5   2   5  180.08    9.70
   6  -4  -5  212.18   11.70
  -2   6  -5  185.78   11.60
  -4  -2  -5  196.18   11.60
  -2   6  -5  208.68   11.90
   6  -4  -5  194.68   11.20
  -4  -2  -5  206.58   11.60
  -4  -2  -5  185.48   11.70
  -6   4   5  205.58   11.40
   2  -6   5  223.08   12.00
   2  -6   5  212.68   11.80
   4   2   5  201.38   11.80
  -6   4   5  215.38   12.00
   3  -4  -5  121.09    7.50
  -4   1  -5  132.49    7.10
   1   3  -5  127.19    7.10
   3  -4  -5  129.39    7.30
   1   3  -5  143.69    7.70
  -4   1  -5  119.59    7.10
  -4   1  -5  124.99    7.30
  -3   4   5  127.39    7.60
  -1  -3   5  125.09    7.20
   4  -1   5  125.39    7.30
  -1  -3   5  117.69    7.50
  -4   4  -5    0.10    0.50
   0  -4  -5    0.90    0.60
  -4   4  -5    0.60    0.60
   0  -4  -5   -0.20    0.60
  -4   0   5    3.20    1.10
  -4   0   5    0.60    0.50
   4  -4   5   -0.50    0.40
  -4   0   5    0.20    0.30
   0   4   5    1.30    0.90
   0   4   5   -0.30    0.30
   4  -4   5    0.50    0.50
  -4   0   5    0.60    0.40
   7  -3  -5   60.79    4.30
  -3  -4  -5   65.69    4.90
  -3  -4  -5   64.19    5.60
  -4   7  -5   78.89    5.20
   7  -3  -5   71.49    4.80
   3   4   5   62.19    4.70
   4  -7   5   62.59    4.90
   3   4   5   71.59    5.30
  -7   3   5   65.89    4.40
   4  -7   5   63.99    5.00
  -7   3   5   62.39    5.10
   8  -5  -5   40.80    3.50
  -3   8  -5   39.70    3.80
   8  -5  -5   38.50    3.20
  -5  -3  -5   42.30    4.30
  -5  -3  -5   39.30    4.70
  -5  -3  -5   40.00    3.50
  -8   5   5   35.10    4.50
  -8   5   5   33.50    3.20
   3  -8   5   35.90    4.30
   5   3   5   38.40    3.90
   3  -8   5   34.00    4.20
  -5   0  -5   -0.30    0.50
   5  -5  -5   -0.20    0.60
   0   5  -5    0.40    0.60
  -5   0  -5    0.30    0.50
  -5   0  -5   -0.20    0.40
   0   5  -5   -0.10    0.60
  -5   0  -5   -0.10    0.50
   5  -5  -5    0.40    0.60
  -5   5   5    0.00    0.70
  -5   5   5    0.70    0.60
   0  -5   5   -0.20    0.50
   0  -5   5    0.90    0.80
   3   2  -5  172.48    9.90
  -5   3  -5  180.98   10.10
   3   2  -5  189.88   10.70
   2  -5  -5  195.98   10.50
  -5   3  -5  181.28   10.40
   2  -5  -5  179.58   10.70
  -3  -2   5  185.28   10.00
  -2   5   5  184.78   10.40
   5  -3   5  173.68   10.70
  -3  -2   5  209.18   10.80
   5  -3   5  162.68    9.80
  -2   5   5  200.18   10.90
  -1  -5  -5   60.99    4.30
  -5   6  -5   53.49    4.00
  -5   6  -5   53.09    4.20
  -1  -5  -5   45.10    4.30
   5  -6   5   56.29    4.30
  -6   1   5   67.99    4.60
   5  -6   5   62.79    4.20
  -6   1   5   45.80    4.10
   1   5   5   52.49    4.00
   1   5   5   41.20    4.20
  -6   1   5   55.19    3.60
  -5   9  -5  145.69    9.80
  -4  -5  -5  155.68    9.70
   9  -4  -5  121.99    9.90
   9  -4  -5  146.59    9.00
  -9   4   5  151.28    9.00
   5  -9   5  143.69    9.70
   5  -9   5  154.18    9.90
  -9   4   5  165.28   11.60
  -9   4   5  159.38   10.20
  -4  10  -5    5.80    2.00
  10  -6  -5    6.10    1.50
  -6  -4  -5    5.20    1.70
   6   4   5    2.50    1.70
 -10   6   5    2.30    2.10
 -10   6   5    4.50    1.40
   4 -10   5    5.50    2.10
  -1   7  -5  177.68   11.00
  -6  -1  -5  184.58   10.50
   7  -6  -5  179.68   10.40
  -6  -1  -5  208.08   11.00
  -1   7  -5  159.38   10.40
  -6  -1  -5  169.98   10.30
  -6  -1  -5  159.88   10.30
   7  -6  -5  182.28   10.70
   6   1   5  162.38   10.50
  -7   6   5  173.08   10.30
  -7   6   5  192.18   11.10
   1  -7   5  171.88   10.60
   1  -7   5  160.38   10.80
   2   4  -5  191.08   11.10
   4  -6  -5  198.18   11.50
   4  -6  -5  176.38   11.60
  -6   2  -5  196.08   11.10
  -6   2  -5  205.08   11.20
  -6   2  -5  196.78   11.30
   2   4  -5  180.58   11.60
  -4   6   5  226.28   12.10
  -4   6   5  214.78   11.50
   6  -2   5  207.08   11.40
  -2  -4   5  204.48   11.90
  -2  -4   5  200.58   11.20
   1  -6  -5   60.89    4.40
   1  -6  -5   49.10    4.40
  -6   5  -5   58.49    4.20
  -6   5  -5   51.99    3.90
  -5  -1   5   50.49    3.60
  -1   6   5   51.79    4.10
  -5  -1   5   53.49    3.60
   6  -5   5   61.79    3.90
   6  -5   5   54.59    4.20
  -5  -1   5   52.19    4.40
  -5  -1   5   44.20    4.00
  -1   6   5   65.49    4.80
  -2  -6  -5   99.59    7.10
  -6   8  -5  106.29    7.10
  -8   2   5   94.79    7.20
  -8   2   5  109.29    7.30
   6  -8   5  103.69    7.00
   2   6   5  112.59    7.70
  -8   2   5   97.49    6.40
  -8   2   5   98.59    6.40
   6  -8   5  105.99    7.20
  -6  11  -5   20.60    3.60
  -5  -6  -5   15.60    2.90
  11  -5  -5   15.10    2.60
   5   6   5   19.30    3.70
   6 -11   5   14.80    3.10
 -11   5   5   18.20    3.50
  12  -7  -5    9.70    2.30
  -7  -5  -5   11.50    2.80
  -5  12  -5   11.70    3.10
 -12   7   5   14.50    3.50
   5 -12   5    8.10    2.50
   7   5   5   10.50    3.80
  -7  -2  -5    7.30    1.90
   9  -7  -5    5.50    1.60
  -7  -2  -5    1.60    1.30
  -2   9  -5    6.40    2.10
  -9   7   5    3.70    1.40
   2  -9   5    1.30    1.40
  -9   7   5    3.80    1.80
   7   2   5    2.60    1.70
  -7   1  -5  184.58   10.40
  -7   1  -5  179.18   10.50
   1   6  -5  179.08   11.00
  -7   1  -5  185.78   10.60
   1   6  -5  164.08   10.30
  -7   1  -5  169.68   10.40
   6  -7  -5  170.48   13.10
   6  -7  -5  162.18   10.40
  -1  -6   5  171.98   10.50
  -1  -6   5  189.58   11.20
  -6   7   5  165.68   10.90
  -7   4  -5   67.49    4.60
  -7   4  -5   62.49    4.70
   3  -7  -5   64.49    4.90
   4   3  -5   66.39    4.30
   4   3  -5   62.39    5.00
  -3   7   5   60.29    5.10
   7  -4   5   56.89    4.10
  -4  -3   5   69.29    5.30
  -3   7   5   59.79    4.70
  -4  -3   5   66.19    4.40
   7  -4   5   63.99    4.70
   0  -7  -5    0.40    0.90
  -7   7  -5    0.70    0.80
  -7   7  -5    1.50    0.90
  -7   0   5    0.20    0.50
  -7   0   5    0.00    0.50
  -7   0   5   -0.60    0.60
  -7   0   5    0.90    1.10
   7  -7   5    0.20    0.70
   7  -7   5    1.40    0.90
   0   7   5   -0.20    0.90
  -7  10  -5    0.30    1.20
  -3  -7  -5    3.70    1.60
 -10   3   5    1.30    1.00
 -10   3   5    0.20    0.70
 -10   3   5    1.30    1.70
   7 -10   5    0.00    0.90
   3   7   5    0.70    1.30
  13  -6  -5    2.30    1.40
  -6  -7  -5    4.10    1.80
  -7  13  -5    0.50    1.60
 -13   6   5    1.90    2.30
 -14   8   5   15.20    4.20
  -8  -3  -5    0.00    1.20
  -8  -3  -5    0.40    1.00
  -3  11  -5    0.40    1.50
  11  -8  -5   -1.30    0.80
 -11   8   5    1.20    1.20
   3 -11   5    0.30    1.30
   0   8  -5    1.70    1.50
  -8   0  -5    3.00    1.50
  -8   0  -5    1.60    1.00
   8  -8  -5    0.60    1.00
  -8   0  -5    0.20    1.10
  -8   0  -5    2.30    1.30
  -8   8   5    1.80    1.50
   0  -8   5    2.40    1.60
   3   5  -5   39.20    3.30
   5  -8  -5   37.90    3.90
   3   5  -5   37.70    4.50
  -8   3  -5   40.10    3.40
  -8   3  -5   40.30    4.20
  -8   3  -5   36.80    3.40
   5  -8  -5   35.10    4.10
  -5   8   5   30.90    3.70
  -3  -5   5   35.50    3.30
   8  -3   5   42.20    3.60
  -5   8   5   29.10    4.00
  -8   6  -5   99.09    6.60
  -8   6  -5   97.19    6.80
  -6  -2   5  100.39    6.30
   8  -6   5  101.59    6.20
   8  -6   5   93.99    6.70
  -6  -2   5   90.79    6.20
  -2   8   5  110.69    7.70
  -6  -2   5   90.69    6.80
  -1  -8  -5   14.20    2.80
  -8   9  -5   12.50    2.50
  -9   1   5   16.10    2.30
   1   8   5   16.60    3.40
   8  -9   5   17.70    2.90
  -9   1   5   15.80    3.10
  -9   1   5   16.40    2.30
   8  -9   5   14.00    2.70
  -8  12  -5   -0.60    1.10
 -12   4   5    1.70    1.00
   8 -12   5    1.90    1.70
 -12   4   5    0.30    1.40
   4   8   5   -0.10    1.30
  13  -9  -5    2.10    1.50
  -9  -4  -5    2.00    1.60
  -9  -1  -5   32.70    4.10
  -9  -1  -5   18.80    3.50
  -1  10  -5   26.80    4.30
  10  -9  -5   22.00    3.40
 -10   9   5   28.40    4.40
   1 -10   5   22.50    3.70
   7  -9  -5    2.30    1.60
   2   7  -5    3.80    1.90
  -9   2  -5    4.20    1.60
  -9   2  -5    6.00    1.70
  -9   2  -5    4.30    1.60
  -2  -7   5    3.70    1.40
  -7   9   5    2.90    1.60
   5   4  -5  148.69    9.50
   5   4  -5  140.39    9.90
  -9   5  -5  145.49    9.30
   4  -9  -5  167.48   10.00
  -9   5  -5  138.39    9.00
  -5  -4   5  151.88    9.10
   9  -5   5  146.59    9.30
  -4   9   5  146.99   10.90
   1  -9  -5   18.90    3.20
  -9   8  -5   18.10    2.90
   9  -8   5   20.90    3.30
  -8  -1   5   17.20    2.40
  -1   9   5   14.60    3.10
  -8  -1   5   17.50    3.30
  -8  -1   5   21.00    2.80
  -2  -9  -5   18.20    3.40
  -9  11  -5   24.30    3.70
 -11   2   5   21.30    3.80
 -11   2   5   24.30    3.00
   2   9   5    9.90    4.60
   9 -11   5   22.90    3.80
  12 -10  -5    3.50    1.90
 -10  -2  -5    6.70    2.10
  -2  12  -5    7.60    2.90
 -10  -2  -5    5.50    2.20
 -12  10   5    8.90    3.00
   1   9  -5   18.00    3.60
   9 -10  -5   27.10    3.80
 -10   1  -5   32.50    4.20
 -10   1  -5   22.50    3.30
  -1  -9   5   17.40    3.20
  -9  10   5   20.30    3.80
 -10   4  -5    4.40    1.70
   6 -10  -5    3.20    1.60
 -10   4  -5    4.00    1.50
   4   6  -5    2.70    1.70
  -6  10   5    3.60    1.80
  -4  -6   5    5.80    1.70
   3 -10  -5    0.10    1.10
 -10   7  -5    1.90    1.10
  -7  -3   5    2.20    1.10
  10  -7   5    1.30    1.00
  10  -7   5    1.40    1.20
  -7  -3   5    3.20    1.70
  -3  10   5    1.60    1.70
  -7  -3   5    0.60    0.90
 -10  10  -5    1.20    1.20
   0 -10  -5    2.50    1.70
 -10   0   5   -0.40    1.30
   0  10   5   -0.40    1.30
 -10   0   5    0.40    0.80
  10 -10   5    1.10    1.20
 -10  13  -5    3.50    2.30
 -11   0  -5   -0.60    1.30
 -11   0  -5    0.30    1.00
  11 -11  -5    0.50    1.50
   0  11  -5   -0.30    1.40
   0 -11   5   -0.60    1.10
 -11  11   5    0.40    1.40
 -11   3  -5    0.30    1.20
   3   8  -5    3.40    1.80
 -11   3  -5    1.50    1.20
   8 -11  -5    2.00    1.50
  -3  -8   5    0.60    1.20
  -8  11   5    0.30    1.30
   6   5  -5   21.40    3.90
 -11   6  -5   17.10    3.00
   5 -11  -5   13.50    3.00
 -11   6  -5   17.10    2.80
  11  -6   5   16.00    3.00
  -6  -5   5   18.00    3.00
  -5  11   5   22.60    4.20
   2 -11  -5   14.80    4.70
 -11   9  -5   22.50    3.50
  -9  -2   5   24.10    4.10
  -9  -2   5   20.00    2.90
  11  -9   5   18.00    3.30
 -11  12  -5    2.10    1.60
 -12   1   5    0.10    1.90
 -12   1   5    2.00    1.20
 -12   2  -5    7.40    2.50
 -12   2  -5    4.50    1.70
  10 -12  -5    5.20    2.20
 -10  12   5    3.10    2.90
  -2 -10   5    5.60    2.10
   5   7  -5   11.00    3.20
 -12   5  -5   10.20    2.60
   7 -12  -5   12.00    2.90
  -7  12   5   11.70    3.10
  12  -5   5    7.20    2.10
  -5  -7   5   13.50    2.80
   4 -12  -5    0.30    1.40
  -8  -4   5    1.10    1.20
  -8  -4   5    0.90    1.50
  12  -8   5    1.30    1.20
  -4  12   5    0.20    1.70
 -12  11  -5    1.40    1.30
 -11  -1   5    0.30    1.00
 -13   4  -5    0.60    1.20
 -13   4  -5    1.50    1.90
  -9  13   5    2.50    2.10
  -4  -9   5    1.90    1.50
 -13   7  -5    3.60    1.50
  -6  13   5    1.70    2.80
  13  -7   5    1.60    1.90
  -7  -6   5    1.90    1.50
 -10  -3   5    1.70    1.30
   0   0  -6  930.01   48.70
   0   0  -6  916.01   48.60
   0   0   6  796.62   48.00
   0   0   6  845.62   48.20
  -1  -1  -6  414.86   26.20
  -1   2  -6  438.96   29.20
  -1  -1  -6  447.76   27.70
   2  -1  -6  520.95   29.40
  -1   2  -6  392.06   27.40
   1  -2   6  474.25   29.60
   1  -2   6  422.56   27.50
  -2   1   6  435.26   27.40
   1   1   6  445.36   26.70
   1   1   6  433.36   27.30
  -2   1   6  420.26   28.50
   1   1  -6  456.15   27.20
   1  -2  -6  465.95   29.10
  -2   1  -6  508.65   28.10
  -2   1  -6  461.75   26.80
   1  -2  -6  470.45   31.30
  -1   2   6  440.86   28.80
  -1  -1   6  435.76   27.30
   2  -1   6  416.56   26.50
   2  -1   6  450.95   27.30
  -1   2   6  479.05   31.30
  -1  -1   6  425.06   28.30
  -2  -2  -6  794.32   37.00
  -2   4  -6  705.43   36.30
   2   2   6  712.83   36.20
  -4   2   6  618.24   36.30
   3  -3  -6 3154.08  167.88
  -3   0  -6 3176.78  162.58
   3  -3  -6 3041.60  170.68
   0   3  -6 3281.07  170.08
   0   3  -6 2942.21  166.98
  -3   3   6 3367.96  168.58
  -3   3   6 3310.27  171.68
   0  -3   6 3041.50  169.48
   0  -3   6 3321.17  167.88
  -3   3  -6  139.39    7.50
   0  -3  -6  117.89    7.60
  -3   3  -6  128.09    7.10
  -3   0   6  121.29    7.50
  -3   0   6  146.09    7.70
   3  -3   6  123.09    7.10
  -3   0   6  129.89    6.90
  -3   0   6  128.29    6.90
   3  -3   6  134.59    7.50
   0   3   6  139.89    7.50
   0   3   6  143.89    7.80
   6  -3  -6  734.03   37.00
  -3  -3  -6  781.92   37.60
  -3  -3  -6  742.83   37.90
   6  -3  -6  714.43   37.50
  -3   6  -6  778.52   38.30
  -3   6  -6  715.93   37.60
   3  -6   6  705.13   37.60
  -6   3   6  618.94   38.00
  -6   3   6  760.22   37.90
   3   3   6  673.13   37.70
   3   3   6  718.23   37.40
   3  -6   6  715.13   37.60
  -4  -1  -6  135.39    8.50
  -1   5  -6  141.39    9.10
  -4  -1  -6  134.39    8.50
  -4  -1  -6  154.98    8.70
   5  -4  -6  160.68    8.80
  -1   5  -6  146.89    8.50
   5  -4  -6  139.79    8.30
  -5   4   6  151.28    9.00
   4   1   6  151.28    8.60
  -5   4   6  150.28    8.30
   1  -5   6  151.38    8.60
   1  -5   6  141.29    8.80
  -2   4   6  688.43   35.10
  -2  -2   6  677.13   35.30
  -4   5  -6 2011.50  107.89
  -1  -4  -6 1901.81  105.29
  -1  -4  -6 1978.40  109.89
   5  -1  -6 1914.91   97.59
   5  -1  -6 1889.01   97.79
  -4   5  -6 1866.61  110.09
   1   4   6 1883.31  106.79
   4  -5   6 1860.31  106.79
   1   4   6 1730.63  103.39
  -5   1   6 1751.92  101.89
   4  -5   6 1837.12  109.89
  -4   8  -6  196.08   12.50
  -4  -4  -6  211.88   12.50
   8  -4  -6  230.58   12.40
   8  -4  -6  225.58   11.90
  -4  -4  -6  203.18   12.80
   4  -8   6  212.18   12.60
   4   4   6  198.18   12.70
   4   4   6  198.38   12.20
  -8   4   6  212.78   11.90
  -8   4   6  212.08   12.90
  -5  -2  -6  229.88   13.10
  -2   7  -6  212.78   13.00
  -5  -2  -6  224.68   12.80
   7  -5  -6  231.08   12.50
  -2   7  -6  227.68   12.90
   7  -5  -6  194.18   12.60
  -5  -2  -6  228.18   12.70
   2  -7   6  230.68   13.20
   5   2   6  214.88   12.90
   2  -7   6  221.38   12.90
  -7   5   6  224.38   13.20
  -7   5   6  220.48   12.40
  -5   1  -6  158.08    8.60
   4  -5  -6  145.49    9.10
   1   4  -6  136.99    8.90
  -5   1  -6  145.69    8.60
  -5   1  -6  157.68    8.80
   1   4  -6  146.09    8.60
  -1  -4   6  161.08    9.20
  -1  -4   6  149.59    8.70
  -4   5   6  158.78    8.80
  -4   5   6  156.78    9.30
   5  -1   6  149.88    8.80
   4   1  -6 1944.51   98.79
   1  -5  -6 1911.21  108.69
   4   1  -6 1817.82   99.49
   1  -5  -6 1956.30  113.59
  -5   4  -6 1967.90  108.39
  -5   4  -6 1872.31  105.49
   5  -4   6 1800.62  103.89
  -1   5   6 1901.71  108.29
   5  -4   6 1717.43  106.39
  -4  -1   6 1916.11  102.49
  -1   5   6 1933.81  112.19
  -4  -1   6 1980.20  101.99
  -2  -5  -6  720.53   36.50
   7  -2  -6  711.53   35.70
  -5   7  -6  706.13   36.30
  -2  -5  -6  653.03   36.80
  -5   7  -6  675.43   36.50
   5  -7   6  629.54   36.10
  -7   2   6  816.02   37.00
  -7   2   6  649.04   36.40
  -7   2   6  677.73   35.60
   2   5   6  702.53   36.90
   5  -7   6  654.83   36.40
   2   5   6  711.43   36.20
  -5  -5  -6   47.80    5.10
  10  -5  -6   39.10    3.60
  -5  10  -6   38.10    5.20
   5 -10   6   39.60    4.70
 -10   5   6   39.00    3.60
 -10   5   6   41.40    5.60
   5   5   6   48.20    5.60
   9  -6  -6  200.08   11.70
  -3   9  -6  199.18   12.60
  -6  -3  -6  203.48   12.10
   6   3   6  216.98   12.70
   3  -9   6  205.28   12.50
  -9   6   6  184.38   12.50
  -9   6   6  194.28   11.80
   6  -6  -6  118.99    7.90
   0   6  -6  114.49    7.50
   6  -6  -6  133.79    7.70
  -6   0  -6  135.29    7.70
  -6   0  -6  134.99    7.90
  -6   0  -6  129.79    7.80
   0   6  -6  100.59    7.80
  -6   0  -6  125.59    7.70
   0  -6   6  124.19    7.80
   0  -6   6  115.69    8.10
  -6   6   6  122.69    7.60
  -6   6   6  119.19    8.10
   3  -6  -6  599.04   36.90
   3   3  -6  706.73   36.20
  -6   3  -6  805.42   36.50
   3  -6  -6  728.83   36.90
   3   3  -6  693.33   37.00
  -6   3  -6  710.63   36.30
  -6   3  -6  675.33   36.70
  -3  -3   6  718.43   37.20
  -3   6   6  683.83   37.20
  -3  -3   6  705.93   36.40
   6  -3   6  738.33   36.80
  -3   6   6  700.23   36.70
  -6   6  -6 1204.28   62.59
   0  -6  -6 1205.18   63.09
   0  -6  -6 1282.37   63.69
   6  -6   6 1184.38   62.99
  -6   0   6 1189.38   62.09
   0   6   6 1247.08   63.59
   6  -6   6 1299.27   62.49
  -6   0   6 1183.88   62.19
  -6   0   6 1213.48   63.19
   0   6   6 1113.49   62.99
  -6   0   6 1356.46   63.29
  -6   9  -6   60.59    5.50
   9  -3  -6   78.09    5.10
   6  -9   6   78.49    6.00
   3   6   6   79.79    6.30
  -9   3   6   68.99    6.00
   6  -9   6   71.09    5.70
  -9   3   6   76.19    5.10
  -6  12  -6    6.70    2.40
  12  -6  -6    3.20    1.40
  -6  -6  -6    4.70    2.20
 -12   6   6    5.50    2.40
   6 -12   6    4.70    2.30
  -4  11  -6    6.70    2.40
  -7  -4  -6    4.20    1.70
   7   4   6    4.90    2.10
 -11   7   6    4.40    2.00
   4 -11   6    5.60    2.20
  -1   8  -6  545.95   29.40
  -7  -1  -6  512.55   28.60
   8  -7  -6  496.25   28.80
  -7  -1  -6  539.25   28.70
  -7  -1  -6  562.34   28.80
  -7  -1  -6  508.45   28.90
   8  -7  -6  531.25   28.60
  -8   7   6  542.25   28.60
   1  -8   6  553.44   29.00
  -8   7   6  553.84   29.50
   5  -7  -6  242.68   13.20
   5  -7  -6  285.67   14.70
  -7   2  -6  209.18   12.70
  -7   2  -6  220.38   12.80
   2   5  -6  213.28   12.60
  -7   2  -6  230.78   13.00
   2   5  -6  236.28   13.60
  -5   7   6  211.48   13.40
  -5   7   6  224.08   13.50
   7  -2   6  224.58   13.00
  -2  -5   6  208.48   13.50
  -2  -5   6  237.98   13.00
   2  -7  -6  701.13   36.00
  -7   5  -6  678.13   34.90
   2  -7  -6  662.33   35.40
  -5  -2   6  665.13   35.40
  -5  -2   6  615.64   35.60
  -5  -2   6  631.24   34.70
   7  -5   6  663.13   34.60
   7  -5   6  719.93   35.40
  -2   7   6  679.73   35.30
  -2   7   6  696.43   36.00
  -1  -7  -6   85.89    5.90
  -7   8  -6   66.79    5.20
  -8   1   6   55.99    4.50
  -8   1   6   81.39    5.90
   7  -8   6   62.89    5.00
   7  -8   6   70.19    5.50
  -8   1   6   71.59    4.70
  -7  11  -6   66.49    5.90
  -4  -7  -6   64.09    5.80
 -11   4   6   59.09    6.10
 -11   4   6   67.39    5.00
 -11   4   6   55.59    4.80
   7 -11   6   62.19    6.80
   4   7   6   64.79    6.20
  -5  13  -6    1.90    1.80
  13  -8  -6   -0.60    1.00
  -8  -5  -6    0.60    1.30
  10  -8  -6   53.39    4.60
  -8  -2  -6   46.80    4.50
  -2  10  -6   51.29    5.30
  -8  -2  -6   50.29    4.80
 -10   8   6   58.79    5.50
   2 -10   6   57.89    6.10
   1   7  -6  611.54   31.30
  -8   1  -6  558.34   30.20
  -8   1  -6  535.05   30.20
   7  -8  -6  563.64   30.40
  -8   1  -6  520.55   30.20
  -8   1  -6  612.34   31.30
  -1  -7   6  559.64   30.50
  -7   8   6  582.34   31.20
  -8   4  -6  208.78   12.40
   4   4  -6  211.18   12.00
  -8   4  -6  186.18   11.90
   4  -8  -6  230.58   13.20
   4  -8  -6  211.48   12.70
   4   4  -6  210.38   13.00
  -8   4  -6  213.18   12.20
  -4   8   6  218.88   13.20
  -4  -4   6  219.18   12.20
   8  -4   6  213.08   12.40
  -8   7  -6   74.69    5.40
   8  -7   6   75.39    5.70
  -7  -1   6   71.39    4.90
   8  -7   6   82.69    5.20
  -7  -1   6   73.39    5.90
  -7  -1   6   64.99    4.90
  -8  10  -6   97.39    7.30
  -2  -8  -6   95.69    7.50
   8 -10   6  100.09    7.60
   2   8   6   94.49    7.90
 -10   2   6  103.39    7.60
 -10   2   6  104.59    7.90
 -10   2   6   92.49    6.40
  -8  13  -6   19.10    3.80
  -5  -8  -6   13.80    4.40
 -13   5   6   17.00    4.20
 -13   5   6   23.30    3.30
  12  -9  -6   86.89    6.70
  -9  -3  -6   81.99    6.90
  -3  12  -6   78.59    7.50
   3 -12   6   86.79    7.50
 -12   9   6   90.99    7.70
  -9   0  -6    5.00    1.60
   9  -9  -6    3.30    1.50
   0   9  -6    4.00    1.90
   0  -9   6    3.30    1.60
  -9   9   6    6.40    2.20
   3   6  -6  217.58   12.20
  -9   3  -6  216.48   12.30
  -9   3  -6  196.58   12.30
   6  -9  -6  238.08   16.00
   3   6  -6  197.58   13.00
  -6   9   6  189.08   13.00
   9  -3   6  204.68   12.40
  -3  -6   6  211.58   12.40
   3  -9  -6   76.79    6.20
  -9   6  -6   76.89    5.70
  -6  -3   6   92.19    6.50
  -3   9   6   94.19    7.10
   9  -6   6   84.39    6.10
  -6  -3   6   78.09    5.50
  -6  -3   6   79.19    5.60
   9  -6   6   70.89    5.20
   0  -9  -6  293.37   17.10
  -9   9  -6  295.07   16.60
   9  -9   6  273.77   16.80
   9  -9   6  281.47   16.10
  -9   0   6  286.47   15.70
  -9   0   6  280.17   17.10
  -9   0   6  267.27   16.10
  -3  -9  -6    1.10    1.60
  -9  12  -6   -1.00    1.00
 -12   3   6    0.00    1.60
   9 -12   6    1.10    1.60
   3   9   6   -0.50    1.20
 -10  -1  -6    9.60    2.30
  -1  11  -6   11.80    3.10
  11 -10  -6   11.00    2.50
 -10  -1  -6    9.20    2.60
   1 -11   6    5.80    2.10
 -11  10   6   13.80    3.30
 -10   2  -6   56.49    4.70
   2   8  -6   50.69    5.20
   8 -10  -6   51.79    4.80
 -10   2  -6   49.10    4.70
  -2  -8   6   42.70    5.10
  -8  10   6   47.60    5.80
   5 -10  -6   48.60    5.30
 -10   5  -6   38.90    4.70
   5   5  -6   37.40    4.90
 -10   5  -6   37.30    3.90
  -5  10   6   44.60    5.60
  10  -5   6   47.00    5.00
  -5  -5   6   39.80    4.40
   2 -10  -6   97.29    7.60
 -10   8  -6   93.29    7.00
  -8  -2   6   97.99    6.70
  10  -8   6   95.99    6.50
  -8  -2   6  100.29    7.80
  -2  10   6  100.59    8.10
  10  -8   6  114.09    7.70
  -8  -2   6   95.09    6.60
  -1 -10  -6   86.49    7.50
 -10  11  -6   86.19    7.00
 -11   1   6   85.29    7.70
 -11   1   6   94.99    6.30
   1  10   6   84.69    7.90
  10 -11   6   85.89    7.30
 -11   1  -6    6.10    1.90
  10 -11  -6    8.20    2.30
 -11   1  -6    9.60    2.60
   1  10  -6    9.80    2.90
  -1 -10   6   11.60    2.70
 -10  11   6   10.50    3.10
   4   7  -6    4.50    2.30
 -11   4  -6    6.50    2.10
   7 -11  -6    6.70    2.20
  -7  11   6    4.10    2.00
  -4  -7   6    5.80    1.90
  11  -4   6    4.90    1.80
 -11   7  -6   55.19    4.80
   4 -11  -6   60.79    5.70
 -11   7  -6   65.39    5.30
  -7  -4   6   64.99    5.90
  -7  -4   6   57.69    4.90
  -4  11   6   67.09    6.60
  11  -7   6   56.99    5.30
   1 -11  -6   85.39    7.40
 -10  -1   6   92.19   12.30
  11 -10   6   76.79    8.80
 -10  -1   6   90.19    6.20
  -1  11   6   74.09    7.60
 -11  13  -6    0.00    1.40
 -12   0  -6   37.80    5.60
 -12   0  -6   45.10    5.40
   9 -12  -6   84.99    7.10
 -12   3  -6   69.39    6.60
 -12   3  -6   81.89    6.60
   3   9  -6   83.69    7.90
  -3  -9   6   82.89    6.90
   6 -12  -6    4.40    2.00
 -12   6  -6    5.40    1.90
   6   6  -6    4.30    2.20
  12  -6   6    2.30    1.60
  -6  12   6    3.90    2.30
  -6  -6   6    2.30    1.50
   3 -12  -6    0.00    1.40
  -9  -3   6    0.80    1.60
  -3  12   6   -1.70    1.10
  12  -9   6   -0.90    0.90
  -9  -3   6    0.70    1.00
 -13   2  -6   49.90    6.10
 -13   2  -6   49.60    6.10
 -13   5  -6    0.00    1.50
 -13   5  -6   -0.20    1.30
  -8  13   6    1.50    2.00
 -13   8  -6   11.70    2.60
  -8  -5   6   17.80    3.10
  13  -8   6   16.50    3.20
  -7  -7   6    4.50    2.00
  -1   0  -7   -0.10    0.20
   1  -1  -7    0.70    0.50
   0   1  -7    0.40    0.30
   1  -1  -7    0.20    0.20
  -1   0  -7    0.20    0.30
   1   0   7    0.50    0.30
   0  -1   7    0.40    0.30
   0  -1   7    0.00    0.20
   1   0   7    0.50    0.40
  -1   1   7   -0.10    0.20
   0  -1   7    0.90    0.40
  -1   1   7   -0.20    0.40
   3  -2  -7  750.72   47.90
  -2  -1  -7  822.02   45.40
  -2  -1  -7  768.52   43.60
  -1   3  -7  727.03   46.30
   2   1   7  800.22   44.30
  -3   2   7  773.52   46.30
  -3   2   7  748.03   48.20
   1  -3   7  790.92   47.20
  -2   2  -7    0.20    0.40
   0  -2  -7    0.30    0.50
  -2   2  -7   -0.10    0.20
   2   0  -7    1.00    0.50
   0  -2  -7   -0.10    0.40
   2  -2   7   -0.10    0.20
  -2   0   7    0.20    0.40
   2  -2   7    0.70    0.40
   0   2   7    0.50    0.50
  -2   0   7    0.20    0.10
   0   2   7   -0.10    0.30
  -2   0   7    0.20    0.10
  -3  -2  -7   22.60    2.50
  -2   5  -7   18.70    2.40
  -3  -2  -7   20.90    2.40
  -2   5  -7   21.20    2.50
   5  -3  -7   26.30    1.90
  -3  -2  -7   22.30    2.70
   3   2   7   18.60    2.40
  -5   3   7   25.10    1.90
   2  -5   7   22.50    2.20
   2  -5   7   18.70    2.40
  -5   3   7   27.40    2.60
   3   2   7   21.30    2.60
  -3   1  -7  772.62   44.80
  -3   1  -7  863.51   46.10
   2  -3  -7  775.52   49.10
   1   2  -7  820.12   47.50
   2  -3  -7  845.12   52.59
   3  -1   7  790.92   44.90
  -2   3   7  719.63   50.99
  -2   3   7  848.02   49.99
   3  -1   7  836.42   45.30
  -1  -2   7  860.21   49.70
  -1  -2   7  780.92   47.10
   4  -1  -7   95.49    5.40
   4  -1  -7   90.09    5.90
  -1  -3  -7   98.49    6.00
  -3   4  -7  100.79    6.00
  -3   4  -7   95.39    5.70
  -1  -3  -7  101.49    6.20
   1   3   7  112.99    6.40
  -4   1   7   99.79    5.40
  -4   1   7  111.79    6.20
   1   3   7   90.39    5.80
   3  -4   7   92.49    6.00
   3  -4   7   96.19    5.70
  -4  -3  -7   32.80    3.30
   7  -4  -7   36.50    3.00
  -3   7  -7   33.40    3.20
  -3   7  -7   38.30    4.10
  -4  -3  -7   34.30    3.10
   7  -4  -7   34.80    3.10
  -4  -3  -7   32.60    3.60
  -7   4   7   32.10    2.70
   4   3   7   35.30    3.40
  -7   4   7   34.10    4.00
   3  -7   7   27.00    3.40
   3  -7   7   37.30    3.40
   4   3   7   33.90    3.10
  -4   0  -7    0.30    0.60
  -4   0  -7    0.10    0.60
   4  -4  -7   -0.70    0.50
   0   4  -7    0.30    0.60
  -4   0  -7    0.50    0.70
   4  -4  -7    0.60    0.90
   0   4  -7    0.80    0.80
  -4   4   7    0.80    0.80
   0  -4   7    0.40    0.70
   4   0   7   -0.30    0.50
   0  -4   7   -0.20    0.60
  -4   3  -7   98.39    5.40
  -4   3  -7   91.09    5.80
   3   1  -7   95.09    5.30
   1  -4  -7   83.89    6.00
   1  -4  -7   96.09    5.80
   4  -3   7   95.79    5.80
  -1   4   7  101.59    6.20
  -1   4   7   96.39    5.80
   4  -3   7   92.99    5.30
  -3  -1   7   94.09    5.30
  -3  -1   7   97.49    5.90
  -3  -1   7  105.29    6.10
   6  -2  -7  254.07   12.70
  -2  -4  -7  242.18   13.40
   6  -2  -7  250.17   13.30
  -4   6  -7  241.38   13.20
  -2  -4  -7  220.38   13.60
  -4   6  -7  235.38   13.40
   4  -6   7  236.38   13.40
   2   4   7  207.18   13.50
   4  -6   7  223.98   13.20
  -6   2   7  255.97   13.70
  -6   2   7  237.68   12.70
   2   4   7  229.58   13.20
  -4   9  -7  141.09    9.40
   9  -5  -7  158.58    8.70
  -5  -4  -7  141.19    9.20
   4  -9   7  147.79    9.60
  -9   5   7  131.59    9.60
   4  -9   7  134.09    9.30
  -9   5   7  144.99    8.70
   5   4   7  128.79    9.40
  -5  -1  -7  134.19    7.80
  -1   6  -7  122.89    7.60
   6  -5  -7  131.49    7.50
  -5  -1  -7  113.09    7.60
   6  -5  -7  117.79    7.80
  -1   6  -7  142.09    8.20
  -5  -1  -7  126.39    7.80
   1  -6   7  112.79    7.90
  -6   5   7  119.49    7.40
   5   1   7  110.99    7.60
  -6   5   7  138.69    8.30
   1  -6   7  126.09    7.80
  -5   2  -7   19.00    1.80
   2   3  -7   26.30    2.50
  -5   2  -7   18.40    2.40
  -5   2  -7   19.30    1.80
   3  -5  -7   25.90    3.10
   3  -5  -7   22.30    2.80
   2   3  -7   25.90    2.00
   5  -2   7   26.20    2.80
  -2  -3   7   26.00    2.10
  -3   5   7   19.00    2.70
  -3   5   7   24.10    2.20
  -2  -3   7   27.60    2.60
  -5   5  -7    0.80    0.70
  -5   5  -7    0.70    0.60
   0  -5  -7    0.10    0.70
   0  -5  -7    0.50    0.70
  -5   0   7   -0.10    0.30
  -5   0   7    1.30    0.90
  -5   0   7    0.60    0.80
  -5   0   7    0.50    0.40
   0   5   7    0.60    0.60
   5  -5   7    0.20    0.60
   0   5   7    1.00    0.90
   5  -5   7    0.40    0.70
  -5   8  -7   18.40    2.90
   8  -3  -7   15.40    2.50
  -3  -5  -7   22.10    3.10
   8  -3  -7   23.40    2.50
  -8   3   7   18.90    2.80
   5  -8   7   20.60    3.00
   5  -8   7   17.90    2.90
  -8   3   7   19.40    2.30
   3   5   7   24.00    3.20
   3   5   7   15.70    2.80
  -8   3   7   24.40    3.60
  11  -6  -7   27.00    3.50
  -5  11  -7   32.80    4.70
  -6  -5  -7   31.30    4.20
 -11   6   7   35.50    5.00
   5 -11   7   31.50    4.50
   6   5   7   34.20    5.00
  -6  -2  -7   58.59    5.00
   8  -6  -7   57.19    4.40
   8  -6  -7   59.19    4.80
  -6  -2  -7   58.59    4.70
  -2   8  -7   56.49    5.00
  -6  -2  -7   53.69    4.60
  -8   6   7   64.89    5.40
   6   2   7   53.99    4.80
  -8   6   7   62.49    4.50
   2  -8   7   59.59    5.00
   2  -8   7   66.09    5.30
   5  -6  -7  138.29    7.60
   1   5  -7  120.89    7.30
  -6   1  -7   99.79    7.30
   1   5  -7  121.29    7.80
  -6   1  -7  117.39    7.20
  -6   1  -7  116.19    7.20
   5  -6  -7  112.09    7.70
  -1  -5   7  139.89    8.20
  -5   6   7  117.99    7.40
  -5   6   7  118.19    7.90
  -1  -5   7  111.69    7.30
   6  -1   7  127.69    7.60
  -6   4  -7  241.28   13.70
   4   2  -7  224.78   13.80
   2  -6  -7  230.78   14.00
   2  -6  -7  246.08   13.80
  -6   4  -7  267.97   13.30
  -2   6   7  223.08   13.50
  -4  -2   7  291.87   14.10
  -2   6   7  248.18   14.20
  -4  -2   7  238.48   13.10
   6  -4   7  239.78   13.00
   6  -4   7  240.58   13.60
  -4  -2   7  223.58   13.90
  -1  -6  -7  248.78   15.10
  -6   7  -7  254.37   14.70
  -1  -6  -7  250.17   14.70
  -6   7  -7  245.48   14.20
   6  -7   7  242.98   14.60
  -7   1   7  266.87   14.90
  -7   1   7  272.27   14.90
  -7   1   7  235.68   13.60
   6  -7   7  257.77   14.20
   1   6   7  236.68   14.30
   1   6   7  250.97   15.10
  -7   1   7  276.77   13.80
  -6  10  -7    2.20    1.40
  10  -4  -7    2.30    1.10
  -4  -6  -7    2.90    1.40
 -10   4   7    2.50    1.80
   6 -10   7    0.50    1.10
 -10   4   7    1.40    0.90
   4   6   7    1.60    1.40
  13  -7  -7    1.10    1.20
  -6  13  -7    4.70    2.10
  -7  -6  -7   -0.40    1.10
 -13   7   7    3.80    2.30
  10  -7  -7    4.30    1.30
  -3  10  -7    2.90    1.70
  -7  -3  -7    4.00    1.50
   3 -10   7    3.40    1.60
 -10   7   7    6.90    2.20
   7   3   7    3.50    1.60
   0   7  -7    0.90    1.20
   7  -7  -7    1.80    1.10
  -7   0  -7   -0.20    0.70
  -7   0  -7    1.00    0.90
   0   7  -7   -0.20    0.70
   7  -7  -7    0.80    1.10
  -7   0  -7   -1.20    0.60
  -7   0  -7    0.40    0.70
   0  -7   7    0.30    0.90
  -7   7   7    1.20    1.10
   0  -7   7    1.70    1.40
  -7   7   7    0.60    0.90
  -7   3  -7   34.60    2.80
  -7   3  -7   30.30    3.50
   3   4  -7   33.40    2.70
   4  -7  -7   35.70    3.20
  -7   3  -7   29.30    2.80
   3   4  -7   33.50    4.00
   7  -3   7   33.80    3.10
  -3  -4   7   32.00    2.80
  -4   7   7   38.80    4.40
  -3  -4   7   33.00    3.40
   1  -7  -7  257.97   15.30
  -7   6  -7  255.27   14.80
   1  -7  -7  258.87   15.00
  -7   6  -7  260.77   14.30
  -6  -1   7  250.57   14.90
   7  -6   7  275.27   14.90
  -1   7   7  215.58   15.10
  -1   7   7  258.17   14.70
  -6  -1   7  297.27   15.40
  -6  -1   7  274.47   14.00
   7  -6   7  247.78   14.00
  -6  -1   7  244.38   14.00
  -7   9  -7   20.30    3.00
  -2  -7  -7   20.60    3.20
  -9   2   7   16.50    2.30
  -9   2   7    9.40    2.80
  -9   2   7   19.60    2.40
   2   7   7   19.60    3.50
   7  -9   7   15.30    3.00
   7  -9   7   18.00    3.00
  -5  -7  -7    4.30    2.00
  12  -5  -7    5.50    1.60
  -7  12  -7   11.50    2.90
   7 -12   7    7.40    2.40
   5   7   7    8.50    2.80
 -12   5   7    6.80    2.40
  -8  -4  -7    0.50    1.20
  -8  -4  -7    2.50    1.70
  12  -8  -7    0.30    1.00
  -4  12  -7    0.30    1.50
   4 -12   7    1.10    1.30
 -12   8   7    2.30    1.60
   8   4   7    2.20    1.90
  -1   9  -7    3.90    1.70
  -8  -1  -7    4.50    2.00
  -8  -1  -7    7.30    2.00
   9  -8  -7    3.70    1.40
   1  -9   7    7.60    2.10
  -9   8   7    2.90    1.70
   6  -8  -7   53.79    5.60
   2   6  -7   58.49    5.20
  -8   2  -7   63.69    4.70
  -8   2  -7   65.29    4.70
   2   6  -7   63.99    4.60
  -8   2  -7   57.89    4.70
   6  -8  -7   53.99    4.80
  -6   8   7   64.19    5.50
   8  -2   7   56.39    4.70
  -6   8   7   59.89    4.80
  -2  -6   7   57.39    4.70
  -8   5  -7   18.70    3.40
   5   3  -7   16.50    2.90
  -8   5  -7   17.40    2.60
   3  -8  -7   14.50    2.60
   8  -5   7   20.20    2.00
  -5  -3   7   23.20    3.20
   8  -5   7   24.20    3.20
  -5  -3   7   27.70    2.90
  -3   8   7   21.30    3.60
  -5  -3   7   18.00    2.30
  -8   8  -7    0.60    0.90
   0  -8  -7    2.50    1.40
   8  -8   7    3.20    1.20
  -8   0   7   -0.20    0.40
  -8   0   7   -0.60    1.00
   8  -8   7    1.60    1.30
   0   8   7    0.20    1.30
  -8   0   7    1.00    0.70
  -3  -8  -7    2.50    1.60
  -8  11  -7    4.30    1.80
 -11   3   7    3.50    1.20
   8 -11   7    5.10    2.20
 -11   3   7    3.50    2.20
 -11   3   7    2.20    1.10
   3   8   7    6.40    2.60
  14  -9  -7   -0.20    1.20
  -9  -2  -7   18.80    3.50
  11  -9  -7   21.40    3.30
  -2  11  -7   20.70    3.90
  -9  -2  -7   20.20    3.40
 -11   9   7   23.00    4.20
   2 -11   7   32.80    4.90
  -9   1  -7    3.30    1.50
   1   8  -7    5.80    2.10
   8  -9  -7    9.30    2.20
  -9   1  -7    5.10    1.70
  -8   9   7    9.10    2.40
  -1  -8   7    2.10    1.20
  -9   4  -7  146.29    8.70
   4   5  -7  131.59    8.50
  -9   4  -7  141.59    8.80
   4   5  -7  141.99    9.70
   5  -9  -7  143.39   10.20
   9  -4   7  135.89    9.00
  -4  -5   7  134.09    8.80
  -5   9   7  160.38   12.80
   2  -9  -7   17.40    2.90
  -9   7  -7   20.90    2.90
  -7  -2   7   20.40    2.60
  -7  -2   7   18.40    2.50
   9  -7   7   18.40    3.00
  -2   9   7   20.10    3.70
   9  -7   7   15.20    2.20
  -7  -2   7   17.10    3.10
  -9  10  -7   30.60    4.00
  -1  -9  -7   27.70    4.30
 -10   1   7   23.30    2.90
 -10   1   7   24.20    3.30
   9 -10   7   32.00    4.30
   1   9   7   24.50    4.30
 -10   1   7   27.60    4.50
  -9  13  -7    0.30    1.30
 -13   4   7    2.10    1.30
 -13   4   7    0.30    1.90
  13 -10  -7    1.90    1.40
 -10  -3  -7    2.10    1.60
 -13  10   7    2.90    1.80
  10 -10  -7    0.50    1.10
 -10   0  -7    1.00    1.10
   0  10  -7    1.60    1.60
 -10   0  -7   -0.30    0.90
 -10  10   7   -0.10    1.40
   0 -10   7   -0.20    0.90
 -10   3  -7    3.70    1.40
   3   7  -7   10.20    2.80
 -10   3  -7    2.60    1.40
   7 -10  -7    5.60    1.80
  -7  10   7    1.80    1.60
  -3  -7   7    5.50    1.80
  10  -3   7    6.00    1.70
   6   4  -7    2.00    1.60
 -10   6  -7    1.50    1.10
   4 -10  -7    0.40    1.10
 -10   6  -7    1.60    1.00
  -6  -4   7    2.80    1.50
  -6  -4   7    2.00    1.10
  -6  -4   7    1.10    1.00
  10  -6   7    0.90    1.10
  -4  10   7    2.70    1.60
 -10   9  -7   24.30    3.50
   1 -10  -7   21.60    3.60
  -9  -1   7   30.20    3.30
  10  -9   7   32.80    4.30
  -1  10   7   28.20    4.60
  -9  -1   7   25.50    3.20
  10  -9   7   27.10    3.30
  -9  -1   7   22.30    3.90
 -10  12  -7   11.00    2.80
 -12   2   7   14.80    3.60
 -12   2   7   20.30    4.00
  12 -11  -7    3.70    1.80
 -11  -1  -7    3.00    1.60
 -11  -1  -7   -0.20    1.50
 -12  11   7    2.00    1.70
 -11   2  -7   16.70    3.20
   9 -11  -7   19.60    3.50
   2   9  -7   19.70    5.50
 -11   2  -7   23.30    3.50
  -2  -9   7   25.70    3.90
  -9  11   7   22.70    4.20
   5   6  -7   32.40    4.90
 -11   5  -7   32.10    4.10
   6 -11  -7   34.50    4.90
 -11   5  -7   33.40    3.50
  -5  -6   7   30.40    4.00
  -6  11   7   39.10    5.80
  11  -5   7   36.50    4.60
   3 -11  -7    3.50    1.80
 -11   8  -7    4.30    1.60
  -8  -3   7    3.50    1.30
  11  -8   7    2.50    1.20
  11  -8   7    2.50    1.70
  -3  11   7    4.30    2.20
  -8  -3   7    6.30    2.40
 -11  11  -7   -0.60    1.00
  11 -11   7    1.80    1.60
 -11   0   7    0.90    1.00
 -11   0   7    1.90    1.70
  11 -12  -7    3.40    2.70
 -12   1  -7   -0.10    1.50
 -12   1  -7   -0.10    1.10
 -11  12   7    1.30    1.80
   4   8  -7    2.00    1.80
 -12   4  -7    0.90    1.30
 -12   4  -7    0.50    1.30
   8 -12  -7    0.30    1.40
  -8  12   7   -1.60    1.70
  -4  -8   7    0.80    1.30
 -12   7  -7    9.20    2.20
   5 -12  -7    2.80    1.80
  -5  12   7    7.20    2.80
  -7  -5   7    7.90    2.80
  -7  -5   7    8.00    2.10
  12  -7   7    8.30    2.50
 -12  10  -7   12.10    2.60
  12 -10   7   14.70    3.00
 -10  -2   7   13.90    2.50
 -13   3  -7    2.60    1.90
 -13   3  -7    0.30    1.30
 -13   6  -7    1.20    1.30
  -6  -7   7    0.30    1.20
  13  -6   7    3.70    1.80
  -9  -4   7    0.00    1.00
   0  -1  -8 4049.29  212.78
  -1   1  -8 4250.97  212.38
   1   0  -8 4514.05  212.08
   0  -1  -8 3883.51  211.38
  -1   1  -8 4314.67  210.88
   0   1   8 3747.83  211.28
   0   1   8 4278.27  213.38
  -1   0   8 3852.31  211.68
   1  -1   8 3996.50  211.78
   1  -1   8 3911.41  210.68
  -1   0   8 4380.36  212.68
  -2   0  -8 8763.62  472.25
   2  -2  -8 9269.07  477.15
   0   2  -8 9707.73  474.25
   2  -2  -8 9213.58  474.35
  -2   0  -8 8859.01  472.25
   0   2  -8 9529.75  476.15
  -2   2   8 9999.00  475.35
   2   0   8 9728.43  472.15
   0  -2   8 9444.75  474.25
   2   0   8 9104.09  472.35
  -2   2   8 9408.26  477.85
   0  -2   8 9145.99  476.05
  -2   3  -8  596.94   30.70
   4  -3  -8 2726.63  141.79
  -1   4  -8 2475.65  141.59
  -3  -1  -8 2525.35  134.69
  -3  -1  -8 2485.65  133.19
  -1   4  -8 2471.05  139.09
   3   1   8 2555.74  132.49
   1  -4   8 2527.15  141.99
  -4   3   8 2661.83  138.79
   3   1   8 2514.05  132.29
  -4   3   8 2673.23  142.49
   1  -3  -8  529.15   28.90
  -3   2  -8  586.34   28.80
  -2  -3  -8  293.97   16.30
  -3   5  -8  267.47   15.80
   5  -2  -8  298.07   15.40
  -2  -3  -8  324.77   16.20
  -3   5  -8  315.17   16.20
   5  -2  -8  269.47   16.00
  -5   2   8  302.77   15.40
   3  -5   8  304.97   16.20
   3  -5   8  273.67   15.80
   2   3   8  314.17   16.00
   2   3   8  344.47   16.50
  -5   2   8  249.88   16.10
  -2   6  -8  137.29    8.70
  -2   6  -8  162.48    9.00
   6  -4  -8  135.29    8.70
  -4  -2  -8  143.59    8.80
  -4  -2  -8  154.18    9.00
   6  -4  -8  144.09    8.30
  -4  -2  -8  138.49    8.70
  -6   4   8  141.39    8.30
  -6   4   8  144.59    9.20
   4   2   8  150.58    8.90
   2  -6   8  139.89    8.90
   2  -6   8  156.28    8.90
  -4   1  -8 2742.23  133.39
  -4   1  -8 2579.94  134.39
   3  -4  -8 2612.74  144.69
   3  -4  -8 2638.74  140.79
   1   3  -8 2417.16  137.09
  -3   4   8 2358.86  142.79
   4  -1   8 2503.45  132.09
   4  -1   8 2737.03  133.09
  -3   4   8 2650.63  140.99
  -1  -3   8 2503.45  137.89
  -1  -3   8 2483.85  140.49
  -4   4  -8  226.28   12.70
   0  -4  -8  220.78   12.90
   0  -4  -8  225.48   12.60
  -4   4  -8  236.38   12.20
   4  -4   8  226.48   12.10
   4  -4   8  236.68   12.70
  -4   0   8  229.88   12.80
   0   4   8  213.78   12.50
  -4   0   8  229.38   11.90
   0   4   8  215.08   13.20
  -4   0   8  236.98   11.90
  -4   0   8  237.68   12.80
  -3  -4  -8  379.66   21.40
  -4   7  -8  387.06   21.50
   7  -3  -8  413.16   20.70
  -4   7  -8  435.56   21.60
   7  -3  -8  376.86   21.30
  -3  -4  -8  402.16   22.50
  -7   3   8  363.96   20.60
   4  -7   8  382.36   21.50
  -7   3   8  471.45   22.20
   4  -7   8  374.66   21.30
   3   4   8  364.26   21.30
   3   4   8  381.66   21.70
  -5  -3  -8  525.55   27.70
  -5  -3  -8  531.35   27.30
  -5  -3  -8  523.65   27.30
   8  -5  -8  513.35   26.60
  -3   8  -8  511.65   27.40
   8  -5  -8  468.55   27.00
  -8   5   8  458.75   27.50
  -8   5   8  476.85   26.50
   3  -8   8  510.75   27.40
   5   3   8  490.15   27.30
   3  -8   8  532.35   27.60
  -5   0  -8  235.28   13.40
  -5   0  -8  237.28   13.60
   0   5  -8  244.08   13.50
  -5   0  -8  246.98   13.70
   5  -5  -8  263.07   14.00
   0   5  -8  257.77   13.90
  -5   5   8  246.88   13.40
   5   0   8  237.48   13.40
  -5   5   8  267.07   14.30
   0  -5   8  210.78   13.70
   0  -5   8  244.98   13.50
   2  -5  -8  298.27   16.30
   2  -5  -8  314.17   16.80
   3   2  -8  307.97   16.60
  -5   3  -8  326.47   15.80
  -5   3  -8  296.87   16.30
   3   2  -8  279.67   15.70
  -2   5   8  300.87   16.20
   5  -3   8  313.27   15.60
  -2   5   8  261.97   16.60
  -3  -2   8  313.77   15.80
   5  -3   8  308.97   16.30
  -3  -2   8  272.77   16.40
  -1  -5  -8  944.21   48.00
  -5   6  -8  979.30   47.60
  -1  -5  -8  857.71   48.30
  -5   6  -8  963.30   48.10
   5  -6   8  942.91   48.00
  -6   1   8  972.60   47.10
   5  -6   8  930.41   47.50
   1   5   8  860.81   48.20
   1   5   8  907.31   47.80
  -6   1   8  955.50   47.10
  -6   1   8  915.31   48.10
  -6   1   8  873.71   48.10
  -5   9  -8  287.07   15.90
   9  -4  -8  286.27   15.00
  -9   4   8  256.47   14.90
  -9   4   8  237.28   16.00
   5  -9   8  264.27   15.90
   5  -9   8  286.57   16.00
  -6  -4  -8   91.59    7.00
  -4  10  -8   92.29    7.20
  10  -6  -8  100.79    6.50
 -10   6   8   94.99    6.40
 -10   6   8   86.09    7.40
   6   4   8   96.69    7.40
   4 -10   8   91.69    7.20
  -6  -1  -8  853.81   43.10
  -1   7  -8  813.42   42.90
   7  -6  -8  851.51   42.70
  -6  -1  -8  840.62   42.90
   7  -6  -8  798.22   43.10
  -6  -1  -8  811.52   43.00
  -1   7  -8  821.32   43.30
   1  -7   8  840.12   43.00
  -7   6   8  800.92   42.60
   6   1   8  819.52   42.90
   1  -7   8  826.92   43.40
  -7   6   8  789.82   43.50
  -6   2  -8  141.49    8.10
  -6   2  -8  141.59    8.50
   2   4  -8  136.99    8.80
   4  -6  -8  133.39    8.80
   2   4  -8  138.99    8.10
   4  -6  -8  146.59    8.50
  -6   2  -8  152.78    8.20
  -2  -4   8  140.19    8.90
   6  -2   8  138.99    8.50
  -4   6   8  149.29    8.50
  -4   6   8  123.89    8.80
  -6   5  -8 1016.10   49.20
   1  -6  -8 1059.99   50.49
  -6   5  -8  897.41   49.70
   1  -6  -8  969.60   49.90
   6  -5   8  992.60   49.80
  -5  -1   8  942.61   48.90
   6  -5   8  946.71   48.90
  -5  -1   8  988.40   49.90
  -5  -1   8  922.81   48.90
  -1   6   8  915.71   49.60
  -1   6   8  965.30   50.29
  -5  -1   8  934.91   49.99
  -6   8  -8   77.89    5.50
  -2  -6  -8   70.79    5.70
   2   6   8   67.79    5.90
   6  -8   8   72.69    5.40
  -8   2   8   67.59    4.70
  -8   2   8   79.79    6.10
   6  -8   8   81.09    5.90
  -5  -6  -8  214.98   13.70
  11  -5  -8  216.58   12.60
  -6  11  -8  223.28   13.80
   5   6   8  219.18   14.20
   6 -11   8  222.78   14.00
 -11   5   8  197.38   12.50
 -11   5   8  227.78   14.50
  12  -7  -8   47.00    4.10
  -5  12  -8   35.90    5.20
  -7  -5  -8   37.60    5.00
   5 -12   8   49.40    6.10
   7   5   8   35.30    5.90
 -12   7   8   53.19    6.40
  -2   9  -8  246.58   15.60
   9  -7  -8  250.37   14.30
  -7  -2  -8  240.28   15.30
  -9   7   8  271.17   15.70
   2  -9   8  253.47   15.00
   7   2   8  259.27   15.00
  -9   7   8  224.38   14.20
   1   6  -8  782.42   42.40
   6  -7  -8  790.22   42.40
  -7   1  -8  856.51   42.10
   6  -7  -8  795.82   41.90
  -7   1  -8  776.42   41.70
  -7   1  -8  813.42   41.60
   1   6  -8  825.92   41.80
  -7   1  -8  787.32   42.00
  -6   7   8  807.82   42.70
  -1  -6   8  804.92   41.90
  -1  -6   8  793.92   42.60
   3  -7  -8  403.36   21.60
   4   3  -8  430.36   21.50
  -7   4  -8  361.66   20.40
   3  -7  -8  388.66   21.10
  -7   4  -8  340.87   21.30
   4   3  -8  372.26   20.30
  -3   7   8  392.36   21.00
  -3   7   8  429.96   21.80
  -4  -3   8  362.86   21.30
   7  -4   8  368.66   20.90
  -7   7  -8   65.09    4.70
   0  -7  -8   63.99    5.20
   7  -7   8   61.69    4.50
   7  -7   8   69.39    5.20
   0   7   8   58.09    5.30
  -7   0   8   66.99    4.20
  -7   0   8   57.49    4.10
  -7   0   8   63.19    5.20
  -3  -7  -8   89.29    7.00
  -7  10  -8   85.39    6.70
   7 -10   8   94.09    7.10
 -10   3   8   84.79    5.90
 -10   3   8  105.59    7.70
 -10   3   8   83.39    5.80
   3   7   8   86.39    7.30
  -6  -7  -8  132.39    9.60
  13  -6  -8  120.59    8.00
  -7  13  -8  103.69    9.70
 -13   6   8  118.49    9.90
  -8  -3  -8   54.29    5.00
  -3  11  -8   53.89    6.40
  11  -8  -8   47.30    4.30
  -8  -3  -8   41.00    5.30
   3 -11   8   48.70    5.90
 -11   8   8   38.70    5.50
  -8   0  -8  450.15   23.50
  -8   0  -8  474.65   23.90
   8  -8  -8  419.16   23.40
   0   8  -8  430.36   24.20
  -8   0  -8  376.06   23.30
  -8   8   8  393.66   24.10
   0  -8   8  440.66   23.90
  -8   3  -8  431.96   25.20
  -8   3  -8  510.35   25.50
  -8   3  -8  449.26   25.70
   5  -8  -8  490.25   26.10
   3   5  -8  463.85   25.30
   3   5  -8  515.15   26.50
  -5   8   8  468.65   25.90
  -5   8   8  475.95   26.60
   8  -3   8  489.85   25.90
  -3  -5   8  481.85   25.60
   2  -8  -8   79.39    5.80
  -2   8   8   62.79    5.90
   8  -6   8   74.79    4.70
  -6  -2   8   77.79    4.80
  -6  -2   8   64.89    5.50
   8  -6   8   70.29    5.40
  -6  -2   8   63.09    4.70
  -8   9  -8   50.39    4.50
  -1  -8  -8   50.49    5.60
   8  -9   8   54.29    5.00
  -9   1   8   53.79    4.00
   1   8   8   58.69    5.60
  -9   1   8   54.69    4.00
  -9   1   8   58.79    5.40
  -4  -8  -8   97.19    8.20
  -8  12  -8  107.39    8.10
   8 -12   8  102.49    8.30
 -12   4   8  103.49    6.90
   4   8   8   99.49    8.70
 -12   4   8  107.79    8.90
  13  -9  -8   75.89    6.10
  -9  -4  -8   70.89    6.60
 -13   9   8   73.09    7.20
  -1  10  -8    7.20    2.40
  10  -9  -8   11.10    2.40
  -9  -1  -8   11.30    2.30
  -9  -1  -8   12.80    2.60
   1 -10   8    8.90    2.40
 -10   9   8    8.20    2.50
  -9   2  -8  227.38   14.10
   7  -9  -8  250.47   15.20
  -9   2  -8  240.48   14.40
   2   7  -8  264.47   15.30
  -2  -7   8  238.98   14.40
  -7   9   8  249.18   15.30
  -9   5  -8  305.37   15.80
   5   4  -8  269.27   15.40
   5   4  -8  260.37   16.50
   4  -9  -8  280.17   16.40
  -9   5  -8  281.97   15.50
  -5  -4   8  268.97   15.50
   9  -5   8  292.57   16.20
  -4   9   8  261.47   16.80
  -9   8  -8   56.99    4.50
   1  -9  -8   54.69    5.10
  -1   9   8   61.89    5.70
  -8  -1   8   60.19    5.40
   9  -8   8   55.49    5.00
   9  -8   8   55.59    4.20
  -8  -1   8   51.19    4.10
  -8  -1   8   54.69    4.10
  -9  11  -8   71.49    5.80
   2   9   8   66.69    6.60
 -11   2   8   61.19    4.70
 -11   2   8   64.79    6.40
   9 -11   8   51.99    9.20
  -9  14  -8   21.90    4.00
 -10  -2  -8   88.69    8.40
  12 -10  -8   74.69    6.70
 -10  -2  -8   90.49    7.50
  -2  12  -8   99.59    8.30
 -12  10   8   85.79    8.60
 -10   1  -8   10.20    2.50
   1   9  -8   10.90    2.90
 -10   1  -8   11.50    2.40
   9 -10  -8    8.60    2.20
  -1  -9   8   10.00    2.50
  -9  10   8   11.00    2.80
   4   6  -8   93.59    7.60
   6 -10  -8  102.49    7.40
 -10   4  -8   99.99    6.80
 -10   4  -8   87.49    6.50
  -6  10   8   97.19    7.80
  -4  -6   8   97.49    6.80
  10  -4   8   93.89    7.00
 -10   7  -8   95.19    6.50
   3 -10  -8   94.39    7.30
  -7  -3   8   86.99    6.20
  -7  -3   8   89.49    6.20
  -7  -3   8   87.09    7.10
  10  -7   8   88.29    6.90
  -3  10   8  110.99    8.30
  10  -7   8   90.99    5.90
 -10  10  -8  250.17   14.40
   0 -10  -8  239.38   16.70
 -10   0   8  234.78   13.50
 -10   0   8  222.48   13.50
  10 -10   8  248.08   15.10
 -10   0   8  233.88   15.40
 -10  13  -8    8.50    2.40
 -11   0  -8    5.80    2.10
 -11   0  -8    6.00    2.00
   0  11  -8    4.20    3.10
 -11  11   8    4.00    2.40
   0 -11   8    3.80    1.90
 -11   3  -8   47.20    5.40
   8 -11  -8   55.79    6.10
 -11   3  -8   46.20    4.70
   3   8  -8   41.90    5.80
  -3  -8   8   53.19    5.70
  -8  11   8   48.80    6.10
   5 -11  -8  198.68   13.70
   6   5  -8  230.88   14.40
 -11   6  -8  198.28   12.80
 -11   6  -8  192.88   12.60
  -6  -5   8  232.28   13.10
  -5  11   8  258.47   15.10
  11  -6   8  235.18   13.70
  -6  -5   8  206.28   13.80
 -11   9  -8   58.79    5.10
   2 -11  -8   81.19    6.60
  -9  -2   8   66.79    7.70
  -9  -2   8   60.29    4.80
  -9  -2   8   52.29    6.00
  11  -9   8   67.19    5.90
  -2  11   8   63.09    6.50
  11  -9   8   61.69    4.70
 -11  12  -8   20.80    3.50
  10 -12  -8   87.69    7.60
 -12   2  -8   87.49    7.40
  -2 -10   8   89.49    7.50
 -10  12   8   97.99    8.50
   5   7  -8   47.10    6.30
 -12   5  -8   44.70    5.20
   7 -12  -8   43.10    5.70
  -5  -7   8   49.90    5.50
  12  -5   8   49.50    5.60
 -12   8  -8   93.49    6.90
   4 -12  -8   99.19    8.00
  12  -8   8   94.69    8.50
  -8  -4   8   84.89    7.70
  -4  12   8   91.39    8.40
  -8  -4   8  101.49    6.90
 -13   4  -8   74.19    6.40
 -13   4  -8   64.09    6.10
  -4  -9   8   67.99    6.30
 -13   7  -8  125.49    8.70
  13  -7   8  129.59    9.40
  -7  -6   8  120.29    8.70
  -6  -8   8   12.90    3.00
   0   0  -9   -0.20    0.20
   0   0  -9    0.20    0.30
   0   0   9   -0.10    0.30
   0   0   9    0.10    0.40
  -1  -1  -9  100.49    5.70
  -1   2  -9  101.79    5.50
  -1  -1  -9   96.79    5.70
   2  -1  -9  100.69    5.20
   2  -1  -9   98.69    5.80
  -1  -1  -9  107.09    5.80
  -1   2  -9   98.09    5.60
   1  -2   9  107.19    5.50
   1   1   9   96.99    5.70
   1   1   9  100.19    5.70
  -2   1   9   93.89    5.90
   1  -2   9  105.49    5.70
  -2   1   9   96.49    5.20
   1  -2  -9  102.89    6.00
   1  -2  -9  103.39    5.60
  -2   1  -9   99.29    5.80
   1   1  -9   95.79    5.30
  -1  -1   9   97.59    5.80
  -1   2   9  101.69    6.00
   2  -1   9   96.69    5.70
  -1   2   9  101.89    5.60
  -1  -1   9  107.29    5.80
  -1  -1   9  104.29    5.40
  -2   4  -9   27.00    2.20
   4  -2  -9   24.60    1.70
   4  -2  -9   29.10    2.40
  -2  -2  -9   27.20    2.20
  -2   4  -9   25.60    2.10
   2   2   9   20.60    2.20
   2  -4   9   25.50    2.10
   2   2   9   22.80    2.10
  -4   2   9   25.70    3.00
   2  -4   9   25.60    2.20
  -4   2   9   25.40    1.70
   3  -3  -9    0.60    0.40
   0   3  -9    0.80    0.50
  -3   0  -9   -0.20    0.40
   3  -3  -9    1.30    0.70
   0   3  -9    0.30    0.50
  -3   0  -9    0.40    0.40
  -3   3   9   -0.10    0.40
   0  -3   9   -0.20    0.40
   3   0   9   -0.10    0.30
  -3   3   9    2.00    0.90
   3   0   9    0.50    0.50
   0  -3   9    0.00    0.40
  -3   3  -9    3.10    0.80
   0  -3  -9    3.20    0.80
   3   0  -9   -0.30    0.40
  -3   0   9    0.90    0.70
  -3   0   9   -0.10    0.40
   3  -3   9    2.00    0.70
   0   3   9    2.20    0.70
   6  -3  -9   20.20    2.60
  -3   6  -9   22.90    2.30
  -3  -3  -9   22.10    2.90
  -3  -3  -9   19.10    2.50
   6  -3  -9   18.40    1.70
  -3   6  -9   18.50    2.40
   3   3   9   17.20    2.30
   3  -6   9   19.10    2.60
  -6   3   9   18.60    1.70
  -6   3   9   25.20    3.10
   3   3   9   15.30    2.40
   3  -6   9   23.90    2.80
  -4  -1  -9   13.90    2.00
   5  -4  -9   13.50    2.20
  -4  -1  -9   18.00    2.30
   5  -4  -9   10.60    1.50
  -1   5  -9   12.20    1.80
  -4  -1  -9   18.20    2.30
   1  -5   9   12.70    1.90
  -5   4   9   11.40    2.10
   1  -5   9    9.70    1.70
   4   1   9   20.10    2.30
   2   2  -9   23.90    2.30
  -4   2  -9   26.40    2.20
  -4   2  -9   26.10    1.70
   2  -4  -9   24.10    2.40
  -4   2  -9   23.50    1.60
   2   2  -9   22.50    1.70
   2  -4  -9   23.80    2.20
  -2  -2   9   26.10    1.80
  -2   4   9   21.80    2.70
   4  -2   9   23.90    2.20
  -2  -2   9   36.50    2.70
  -2   4   9   22.70    2.10
  -1  -4  -9  466.05   24.40
  -1  -4  -9  440.96   24.60
   5  -1  -9  462.65   24.30
  -4   5  -9  438.66   23.90
  -4   5  -9  447.26   24.40
  -5   1   9  518.55   24.80
  -5   1   9  444.56   23.50
   1   4   9  521.75   25.00
   4  -5   9  411.76   23.80
   4  -5   9  473.35   24.50
   1   4   9  433.16   24.20
  -5   1   9  470.15   24.60
  -5   1   9  463.65   23.50
  -4   8  -9  315.27   19.50
  -4  -4  -9  362.66   19.90
  -4  -4  -9  338.87   20.10
   8  -4  -9  362.36   19.00
   8  -4  -9  339.27   19.60
  -8   4   9  357.06   19.00
   4  -8   9  324.57   19.70
   4  -8   9  353.46   19.90
   4   4   9  398.06   20.40
   4   4   9  366.86   20.40
  -8   4   9  400.86   20.60
   7  -5  -9    1.20    0.70
  -5  -2  -9    1.30    0.90
  -2   7  -9    1.90    1.10
  -5  -2  -9    2.30    1.00
   7  -5  -9   -0.50    0.70
  -5  -2  -9    2.20    1.20
  -2   7  -9    1.40    1.00
  -7   5   9    3.40    1.60
   5   2   9    1.70    1.10
   2  -7   9   -0.60    0.80
   2  -7   9    0.90    0.90
  -7   5   9    2.20    0.80
   1   4  -9   14.10    2.20
   4  -5  -9   13.30    2.30
  -5   1  -9   13.10    1.60
  -5   1  -9   16.00    2.10
  -5   1  -9   16.10    1.60
   1   4  -9   12.80    1.70
   4  -5  -9    9.60    1.80
  -1  -4   9   16.10    2.40
  -1  -4   9   11.00    1.60
  -4   5   9   11.00    1.70
  -4   5   9   11.80    2.10
   5  -1   9   15.00    2.10
  -5   4  -9  464.55   24.60
   1  -5  -9  487.15   24.70
  -5   4  -9  498.25   24.00
   1  -5  -9  462.15   25.00
   5  -4   9  441.56   23.70
  -4  -1   9  490.35   23.90
  -1   5   9  445.86   24.40
  -1   5   9  452.15   25.00
   5  -4   9  462.95   24.60
  -4  -1   9  449.86   23.80
  -4  -1   9  525.45   24.80
  -4  -1   9  387.36   24.60
   7  -2  -9  122.39    8.10
  -2  -5  -9  128.59    8.40
  -5   7  -9  125.29    8.40
   7  -2  -9  129.39    7.50
  -2  -5  -9  115.29    8.50
  -5   7  -9  143.49    8.20
   5  -7   9  124.69    8.00
   5  -7   9  131.99    8.50
  -7   2   9  136.59    8.70
   2   5   9  123.49    8.20
  -7   2   9  136.39    8.60
  -7   2   9  138.69    7.80
   2   5   9  155.48    9.10
  -5  10  -9    5.10    1.80
  10  -5  -9    5.00    1.40
  -5  -5  -9    5.40    1.70
 -10   5   9    5.80    1.50
   5   5   9    3.80    1.90
   5 -10   9    3.50    1.90
 -10   5   9    6.90    2.40
  -3   9  -9    8.40    2.20
  -6  -3  -9    2.00    1.60
   9  -6  -9    6.60    1.50
  -9   6   9    3.50    1.20
   3  -9   9    5.00    2.10
   6   3   9    5.50    2.00
  -9   6   9    4.80    2.00
  -6   0  -9   -0.10    0.60
  -6   0  -9    0.50    0.60
  -6   0  -9    1.30    0.80
   0   6  -9    0.60    0.90
  -6   0  -9    0.70    0.70
   0   6  -9    0.60    0.70
   6  -6  -9   -0.50    0.60
   6  -6  -9    0.60    1.10
   0  -6   9    1.70    0.90
  -6   6   9    0.10    1.00
   0  -6   9    0.90    0.90
  -6   6   9    1.00    0.80
  -6   3  -9   16.10    2.30
   3   3  -9   18.40    1.70
  -6   3  -9   17.70    1.70
   3   3  -9   21.90    3.00
   3  -6  -9   16.20    2.30
   3  -6  -9   23.20    3.10
  -6   3  -9   17.60    1.60
   6  -3   9   17.30    2.30
  -3   6   9   16.50    2.60
  -3  -3   9   20.60    1.80
  -3  -3   9   19.00    2.80
  -3   6   9   21.00    2.50
   0  -6  -9   -0.30    0.90
  -6   6  -9    0.30    0.60
   0  -6  -9    0.10    0.90
  -6   6  -9    0.50    0.70
   6  -6   9    2.00    1.10
  -6   0   9    0.20    0.40
   6  -6   9   -1.00    0.50
  -6   0   9    0.70    0.90
  -6   0   9    0.70    0.80
  -6   0   9    1.50    0.60
   0   6   9    0.90    1.00
   0   6   9   -0.10    0.60
  -3  -6  -9   20.80    3.30
  -6   9  -9   32.00    3.90
   9  -3  -9   22.50    2.60
  -9   3   9   24.10    2.70
   3   6   9   17.00    3.40
   6  -9   9   26.40    3.70
   6  -9   9   22.70    3.30
  12  -6  -9   14.10    2.40
  -6  12  -9   14.00    3.00
  -6  -6  -9   13.30    3.00
   6 -12   9   16.30    3.40
 -12   6   9   14.10    3.70
  11  -7  -9    0.20    0.70
  -4  11  -9    2.50    1.70
  -7  -4  -9   -0.40    0.80
   4 -11   9    0.10    1.30
 -11   7   9    2.30    1.70
   7   4   9    0.40    1.30
  -7  -1  -9  126.09    7.80
   8  -7  -9  106.89    7.40
  -7  -1  -9  115.69    7.80
  -1   8  -9  109.49    8.00
  -7  -1  -9  103.49    7.70
   1  -8   9  116.09    7.90
  -8   7   9  116.19    7.50
  -8   7   9  125.09    8.60
   2   5  -9    2.70    0.90
  -7   2  -9    0.10    1.00
  -7   2  -9    0.60    0.70
  -7   2  -9    1.40    0.80
   5  -7  -9    1.10    1.10
   2   5  -9    0.00    0.80
   5  -7  -9    2.30    1.10
  -2  -5   9    1.10    0.80
  -5   7   9    0.50    0.80
  -2  -5   9    1.10    1.10
  -5   7   9    3.20    1.40
   7  -2   9    1.50    0.90
  -7   5  -9  135.79    8.40
   2  -7  -9   99.39    8.30
   2  -7  -9  128.79    8.40
  -7   5  -9  131.19    7.60
  -2   7   9  127.29    8.80
  -5  -2   9  124.29    8.60
  -5  -2   9  139.59    7.60
   7  -5   9  125.59    7.30
   7  -5   9  135.49    8.30
  -5  -2   9  130.99    7.50
  -2   7   9  132.69    8.20
  -5  -2   9  141.19    8.60
  -1  -7  -9    1.60    1.20
  -7   8  -9    0.20    0.70
  -8   1   9   -0.20    1.10
  -8   1   9    0.30    0.50
   1   7   9    1.00    1.20
   7  -8   9    0.30    0.80
   7  -8   9   -0.10    0.80
  -7  11  -9   65.29    6.10
  -4  -7  -9   75.79    6.60
   4   7   9   79.79    7.10
   7 -11   9   83.39    6.90
 -11   4   9   84.69    5.50
 -11   4   9   92.69    7.50
 -11   4   9   71.19    5.40
  -5  13  -9    0.60    1.60
  -8  -5  -9    0.60    1.40
  13  -8  -9    0.50    1.10
 -13   8   9    3.20    1.90
  10  -8  -9    1.40    1.20
  -2  10  -9   -0.50    0.90
  -8  -2  -9    0.30    1.10
  -8  -2  -9    0.00    0.90
 -10   8   9    2.80    1.50
   2 -10   9   -0.10    1.00
  -8   1  -9  116.19    7.50
   1   7  -9  107.49    8.80
  -8   1  -9  120.79    7.70
   1   7  -9  107.69    7.40
  -8   1  -9  112.89    7.70
   7  -8  -9  122.69    7.80
  -7   8   9  106.59    8.30
  -1  -7   9  117.49    7.70
  -7   8   9  114.29    9.30
  -8   4  -9  330.77   19.10
   4  -8  -9  342.77   19.30
   4   4  -9  348.67   19.70
   4   4  -9  365.06   18.60
  -8   4  -9  342.67   18.50
  -8   4  -9  365.06   18.70
  -4  -4   9  341.07   18.60
   8  -4   9  311.37   19.00
  -4   8   9  333.07   19.80
  -8   7  -9    1.90    0.80
   1  -8  -9   -1.10    0.70
  -1   8   9    0.50    1.10
   8  -7   9    0.90    1.10
   8  -7   9    2.60    0.90
  -7  -1   9    0.10    0.50
  -7  -1   9    0.00    0.50
  -2  -8  -9   10.00    2.40
  -8  10  -9    8.20    2.20
   2   8   9   11.10    2.80
   8 -10   9    6.00    1.90
 -10   2   9    7.30    1.50
 -10   2   9    6.60    1.40
   8 -10   9    5.10    2.00
 -10   2   9   11.30    3.00
  -8  13  -9    0.60    1.30
 -13   5   9    2.90    1.50
 -13   5   9    1.20    2.20
  -9  -3  -9    3.30    2.30
  -3  12  -9    3.30    1.90
  12  -9  -9    5.30    1.90
 -12   9   9    1.70    1.80
   3 -12   9    3.60    1.90
   9  -9  -9    0.00    0.90
   0   9  -9   -1.00    0.90
  -9   0  -9    1.30    1.10
  -9   0  -9    0.30    0.80
   0  -9   9   -0.60    0.90
  -9   9   9   -0.70    0.80
   6  -9  -9    5.20    3.10
   3   6  -9    5.40    2.10
  -9   3  -9    5.50    1.50
   3   6  -9    4.40    1.30
  -9   3  -9    4.50    1.50
  -6   9   9    3.40    1.80
   9  -3   9    2.30    1.30
  -3  -6   9    7.10    1.70
  -9   6  -9   23.50    2.90
   3  -9  -9   26.30    3.70
  -6  -3   9   26.50    2.90
  -6  -3   9   20.90    2.70
   9  -6   9   23.30    2.20
  -6  -3   9   21.70    3.50
   9  -6   9   20.50    3.40
  -3   9   9   24.00    3.90
   0  -9  -9    1.10    1.20
  -9   9  -9    0.80    1.00
   0   9   9    0.60    1.40
  -9   0   9    0.10    0.60
  -9   0   9   -0.10    0.60
   9  -9   9    1.80    1.10
  -9   0   9    1.50    1.50
   9  -9   9   -0.40    1.00
  -9  12  -9    1.80    1.40
  -3  -9  -9    0.80    1.50
 -12   3   9    1.70    1.00
 -12   3   9    0.20    1.90
   3   9   9   -1.80    1.40
 -10  -1  -9   10.40    2.70
  -1  11  -9    7.90    2.60
  11 -10  -9    6.00    1.90
 -10  -1  -9   11.60    2.80
   1 -11   9    8.60    2.60
 -11  10   9   12.50    3.50
   2   8  -9    0.30    1.20
   8 -10  -9    1.10    1.20
 -10   2  -9    0.30    1.00
 -10   2  -9   -0.10    0.90
  -2  -8   9    0.20    0.90
  -8  10   9    1.70    1.50
 -10   5  -9    5.00    1.60
   5 -10  -9    8.60    2.40
   5   5  -9    3.50    1.30
 -10   5  -9    5.00    1.40
   5   5  -9    3.20    1.80
  10  -5   9    4.10    1.70
  -5  -5   9    9.20    1.80
  -5  10   9    6.70    2.40
 -10   8  -9    8.10    1.90
   2 -10  -9    5.60    1.90
  -8  -2   9    8.00    1.70
  10  -8   9    7.70    1.60
  -8  -2   9    5.40    1.40
  10  -8   9    7.10    2.10
  -2  10   9    8.20    2.70
  -8  -2   9    8.50    2.60
  -1 -10  -9    4.40    2.10
   1  10   9    5.40    2.60
  10 -11   9    6.10    2.50
 -11   1   9    7.60    3.00
 -11   1   9    7.10    1.60
  13 -11  -9    0.00    1.20
 -11   1  -9   10.80    2.60
 -11   1  -9   10.90    2.60
  10 -11  -9   12.20    2.90
   1  10  -9    6.60    2.60
  -1 -10   9    5.50    2.10
 -10  11   9    6.90    2.50
 -11   4  -9    0.70    1.00
   4   7  -9    0.10    1.20
 -11   4  -9    2.50    1.40
   7 -11  -9    0.00    1.10
  -4  -7   9   -0.40    0.80
  11  -4   9    0.10    1.20
  -7  11   9   -1.20    0.90
 -11   7  -9   81.59    5.90
   4 -11  -9   78.89    6.80
 -11   7  -9   75.69    5.70
  11  -7   9   77.09    6.50
  -7  -4   9   92.89    7.20
  -7  -4   9   76.79    5.80
  -4  11   9   73.99    7.20
 -11  10  -9    9.60    2.30
   1 -11  -9    5.50    2.30
 -10  -1   9   10.50    2.00
 -10  -1   9    8.70    2.90
  11 -10   9    4.90    2.00
  -1  11   9    6.00    2.50
 -12   0  -9   -0.60    1.30
 -12   3  -9    2.70    1.70
   9 -12  -9    0.70    1.50
 -12   3  -9    3.00    1.50
  -9  12   9    2.70    2.40
  -3  -9   9    0.90    1.50
   6 -12  -9   21.70    3.90
   6   6  -9   15.20    3.80
 -12   6  -9   18.90    3.10
  -6  -6   9   14.80    3.40
  -6  -6   9   17.70    3.00
  12  -6   9   14.50    3.10
  -6  12   9   19.00    4.10
 -12   9  -9    0.20    1.00
  12  -9   9    1.70    1.40
  -9  -3   9    1.40    1.30
  -3  12   9    0.10    1.70
  -9  -3   9    0.60    1.80
 -13   2  -9    2.80    2.90
 -13   5  -9    0.50    1.40
 -13   5  -9   -1.50    1.10
  13  -5   9    2.80    1.80
  -5  -8   9    0.20    1.20
  13  -8   9    5.30    2.20
  -8  -5   9    1.50    1.30
  -7  -7   9   10.40    2.70
  -1   0 -10    2.80    0.60
  -1   0 -10    1.90    0.60
   1  -1 -10    1.20    0.60
   1  -1 -10    1.60    0.40
   0   1 -10    1.80    0.40
   0  -1  10    3.10    0.60
  -1   1  10    1.40    0.60
   1   0  10    2.40    0.50
  -1   1  10    1.60    0.40
   0  -1  10    2.30    0.50
   1   0  10    4.50    0.80
   0  -1  10    1.20    0.40
  -1   3 -10 4212.98  226.78
   3  -2 -10 4246.98  226.48
  -2  -1 -10 4269.97  222.08
  -2  -1 -10 4253.17  223.38
   2   1  10 4325.97  222.08
   1  -3  10 4331.17  227.08
  -3   2  10 4781.82  228.58
  -3   2  10 4019.90  224.08
   2   1  10 4229.58  222.48
  -2   2 -10  360.56   18.30
   0  -2 -10  366.06   18.40
   0  -2 -10  349.07   18.20
   2   0 -10  352.66   18.20
  -2   0  10  319.57   18.20
   0   2  10  331.17   18.10
   0   2  10  332.07   18.30
   2  -2  10  363.16   18.20
   2  -2  10  361.96   17.60
  -2   5 -10  246.28   12.70
  -2   5 -10  215.88   12.60
   5  -3 -10  222.18   12.00
   5  -3 -10  223.08   12.80
  -3  -2 -10  217.88   12.70
  -3  -2 -10  239.28   12.80
  -3  -2 -10  232.38   12.80
   3   2  10  229.48   12.70
   2  -5  10  199.48   12.50
  -5   3  10  250.47   13.20
  -5   3  10  222.78   12.10
   2  -5  10  233.78   12.70
   1   2 -10 4387.56  228.88
  -3   1 -10 4482.35  228.38
   2  -3 -10 4222.68  230.88
  -3   1 -10 4419.56  226.78
   2  -3 -10 4767.42  235.48
  -1  -2  10 4592.44  231.98
   3  -1  10 3973.20  226.88
  -2   3  10 4419.46  231.68
  -2   3  10 4669.23  235.98
   3  -1  10 4410.36  227.58
  -1  -2  10 4269.37  228.98
  -3   4 -10  705.23   34.90
  -1  -3 -10  612.94   35.40
   4  -1 -10  761.82   35.50
  -3   4 -10  671.23   35.40
   1   3  10  677.53   35.30
   1   3  10  704.63   35.70
   3  -4  10  642.24   34.90
   3  -4  10  705.23   35.90
  -4  -3 -10  365.36   19.90
  -4  -3 -10  367.66   20.00
  -3   7 -10  392.46   20.00
  -3   7 -10  342.67   19.90
  -4  -3 -10  334.67   20.00
   7  -4 -10  366.66   19.20
   7  -4 -10  313.97   20.20
   3  -7  10  353.36   19.90
  -7   4  10  376.76   19.20
   3  -7  10  357.36   19.90
   4   3  10  391.16   20.20
  -7   4  10  380.16   20.50
   4  -4 -10 1744.23   94.19
   0   4 -10 1493.65   90.39
  -4   0 -10 1776.32   83.19
   0   4 -10 1391.06   87.09
   4  -4 -10 1482.05   88.29
  -4   0 -10 1514.65   82.59
   0  -4  10 1551.04   91.49
   4   0  10 1330.27   79.09
   0  -4  10 1546.05   88.39
  -4   4  10 1461.55   92.79
   4   0  10 1431.86   79.89
  -4   4  10 1614.04   89.99
   3   1 -10  664.43   33.30
  -4   3 -10  671.33   34.20
   1  -4 -10  573.84   34.30
   1  -4 -10  655.33   34.10
  -1   4  10  720.03   35.20
  -1   4  10  668.73   34.00
  -3  -1  10  669.23   34.40
   6  -2 -10  754.42   38.00
  -4   6 -10  733.33   39.00
  -2  -4 -10  703.23   39.10
  -2  -4 -10  747.93   39.00
  -4   6 -10  692.83   38.50
   6  -2 -10  773.92   39.00
   4  -6  10  692.63   38.50
   2   4  10  764.42   38.90
  -6   2  10  785.32   39.30
   2   4  10  762.82   39.30
  -6   2  10  800.12   38.00
   4  -6  10  747.03   39.00
  -4   9 -10  253.47   15.90
   9  -5 -10  302.67   15.20
  -5  -4 -10  284.37   16.90
  -9   5  10  274.37   16.60
   5   4  10  287.37   16.30
   4  -9  10  239.98   15.80
  -9   5  10  271.37   15.10
   4  -9  10  272.47   16.10
   6  -5 -10  167.38    9.90
  -1   6 -10  166.48    9.80
  -5  -1 -10  164.88    9.70
  -1   6 -10  158.28    9.50
  -5  -1 -10  144.29    9.50
  -5  -1 -10  153.98    9.60
   1  -6  10  160.98    9.60
  -6   5  10  169.38    9.20
  -6   5  10  147.49   10.00
   1  -6  10  162.08    9.90
   5   1  10  163.58    9.50
   2   3 -10  221.78   12.00
  -5   2 -10  239.78   12.70
   2   3 -10  225.58   12.80
   3  -5 -10  225.98   12.90
   3  -5 -10  230.68   12.50
  -5   2 -10  217.48   11.90
  -5   2 -10  214.68   11.90
  -2  -3  10  211.58   12.70
  -3   5  10  229.48   12.40
   5  -2  10  238.08   12.70
  -2  -3  10  225.58   12.10
  -3   5  10  222.78   13.00
  -5   8 -10  520.45   29.70
  -3  -5 -10  562.44   30.20
   8  -3 -10  569.54   29.00
   5  -8  10  553.24   30.10
   3   5  10  662.93   30.90
  -8   3  10  500.05   30.30
   5  -8  10  577.74   29.90
  -8   3  10  530.55   28.90
  -6  -5 -10   13.00    2.80
  11  -6 -10   14.00    2.30
  -5  11 -10   20.40    3.60
   5 -11  10   17.60    3.40
 -11   6  10   19.90    4.30
 -11   6  10   15.90    2.60
   6   5  10   17.70    3.40
  -6  -2 -10  289.97   16.70
  -6  -2 -10  277.17   16.30
  -2   8 -10  322.87   16.90
   8  -6 -10  295.57   15.90
  -8   6  10  267.17   17.00
  -8   6  10  279.87   15.90
   6   2  10  280.07   16.50
   2  -8  10  292.37   16.90
   2  -8  10  279.77   16.50
  -6   1 -10  162.78    9.50
  -6   1 -10  177.98    9.40
   1   5 -10  174.08   10.20
   5  -6 -10  170.68    9.80
  -6   1 -10  157.48    9.80
   5  -6 -10  166.88   10.30
   1   5 -10  156.28    9.50
  -1  -5  10  166.68    9.60
  -5   6  10  180.28   10.60
   6  -1  10  173.48   10.00
  -5   6  10  147.49    9.50
  -1  -5  10  148.29   10.10
   2  -6 -10  750.52   40.90
   4   2 -10  740.13   39.60
  -6   4 -10  756.42   40.50
   2  -6 -10  775.42   40.60
  -6   4 -10  807.82   39.70
   6  -4  10  717.43   39.40
   6  -4  10  786.92   40.50
  -4  -2  10  796.02   40.70
  -2   6  10  736.73   40.30
  -4  -2  10  782.22   39.70
  -2   6  10  895.51   41.40
  -4  -2  10  811.52   40.90
  -1  -6 -10  762.92   44.20
  -6   7 -10  863.01   43.30
  -1  -6 -10  858.21   44.00
  -6   7 -10  783.52   44.40
  -7   1  10  820.12   42.60
  -7   1  10  850.01   44.20
   1   6  10  836.12   44.30
   6  -7  10  825.52   43.20
   1   6  10  817.42   44.30
  -7   1  10  866.61   44.20
   6  -7  10  856.31   44.00
  -7   1  10  886.51   42.60
  10  -4 -10  109.29    7.40
  -6  10 -10  125.89    8.50
  -4  -6 -10  119.69    8.70
   6 -10  10  130.29    8.90
 -10   4  10  121.49    9.20
 -10   4  10  115.89    7.50
   4   6  10  140.09    9.30
  -6  13 -10    6.40    2.60
  13  -7 -10   12.50    2.30
 -13   7  10   16.30    4.20
  -7  -3 -10    1.40    1.30
  -3  10 -10    0.10    1.10
  10  -7 -10    1.90    1.10
   3 -10  10   -1.00    0.80
   7   3  10   -0.20    1.10
 -10   7  10    1.40    1.00
 -10   7  10    4.70    2.20
   0   7 -10  482.45   25.50
  -7   0 -10  484.65   24.70
  -7   0 -10  460.75   24.80
  -7   0 -10  485.95   25.10
   0   7 -10  447.46   24.70
   7  -7 -10  441.46   24.60
   7  -7 -10  444.86   26.90
  -7   0 -10  456.85   25.00
   0  -7  10  461.85   24.90
  -7   7  10  416.36   25.50
  -7   3 -10  362.66   18.90
  -7   3 -10  358.66   19.70
  -7   3 -10  327.47   19.50
   4  -7 -10  380.06   19.70
   3   4 -10  339.37   18.90
   4  -7 -10  358.96   20.10
   3   4 -10  369.16   20.10
  -3  -4  10  327.47   19.90
   7  -3  10  376.26   19.70
  -4   7  10  343.67   20.20
  -4   7  10  345.97   20.10
  -3  -4  10  383.46   19.20
  -7   6 -10  839.22   43.70
   1  -7 -10 1034.40   49.90
  -7   6 -10  806.42   44.50
   1  -7 -10  822.92   44.70
   7  -6  10  951.40   44.40
  -6  -1  10  802.82   44.70
  -1   7  10  954.70   45.60
   7  -6  10  835.22   44.50
  -6  -1  10  848.82   43.50
  -6  -1  10  809.22   44.90
  -1   7  10  806.42   44.90
  -6  -1  10  778.12   43.70
  -7   9 -10   61.49    4.70
  -2  -7 -10   53.19    5.00
   7  -9  10   53.29    4.50
   2   7  10   50.69    5.20
  -9   2  10   58.59    3.90
  -9   2  10   49.80    5.10
   7  -9  10   49.90    4.80
  -9   2  10   53.59    3.80
  -7  12 -10   62.19    5.80
  -5  -7 -10   69.59    7.30
   5   7  10   55.19    6.80
   7 -12  10   71.29    6.40
 -12   5  10   56.29    4.70
 -12   5  10   67.69    6.80
  12  -8 -10   11.70    2.40
  -4  12 -10   11.00    2.90
  -8  -4 -10   14.00    3.10
 -12   8  10   19.70    4.10
   4 -12  10   14.10    3.20
   8   4  10   12.40    3.10
  -8  -1 -10   67.29    5.50
  -1   9 -10   61.39    5.80
   9  -8 -10   68.49    5.30
  -8  -1 -10   73.99    5.60
   1  -9  10   71.59    5.80
  -9   8  10   69.99    6.30
   2   6 -10  260.47   15.40
   6  -8 -10  283.67   16.00
   2   6 -10  284.97   16.50
  -8   2 -10  276.47   15.50
  -8   2 -10  271.77   15.50
  -6   8  10  294.17   16.90
  -6   8  10  253.67   15.70
  -2  -6  10  295.97   15.80
   8  -2  10  283.97   16.00
   3  -8 -10  575.24   30.90
  -8   5 -10  553.84   29.90
  -8   5 -10  604.54   29.90
  -5  -3  10  594.74   30.00
  -5  -3  10  604.74   30.00
  -3   8  10  579.94   31.60
   8  -5  10  585.54   30.80
  -5  -3  10  484.35   30.60
   0  -8 -10  139.79    9.70
  -8   8 -10  149.59    9.00
   8  -8  10  132.49    8.60
   0   8  10  135.39   10.00
   8  -8  10  141.99    9.60
  -8   0  10  162.18   10.20
  -8   0  10  151.48    8.40
  -8   0  10  148.79    8.50
  -3  -8 -10   19.50    3.60
  -8  11 -10   18.60    3.70
   8 -11  10   32.30    4.90
 -11   3  10   37.50    5.30
 -11   3  10   18.20    2.60
 -11   3  10   20.40    2.60
   3   8  10   16.40    3.60
  -8  14 -10   18.20    3.90
  -9  -2 -10   99.49    7.60
  -9  -2 -10  105.29    7.60
  -2  11 -10   93.59    8.00
  11  -9 -10  100.29    7.20
 -11   9  10   93.59    8.20
   2 -11  10   96.59    8.30
  -9   1 -10   69.69    5.60
  -9   1 -10   58.29    5.10
   8  -9 -10   74.49    5.60
  -9   1 -10   68.39    5.40
   1   8 -10   67.19    6.00
  -1  -8  10   69.79    5.60
  -8   9  10   66.09    6.20
  -9   4 -10  285.97   15.50
   5  -9 -10  279.47   16.40
  -9   4 -10  270.47   15.60
   4   5 -10  263.17   16.00
  -5   9  10  282.37   17.10
  -4  -5  10  285.87   15.70
   9  -4  10  285.37   16.30
  -9   7 -10   55.89    4.20
   2  -9 -10   51.29    5.70
   9  -7  10   52.59    3.80
  -2   9  10   41.40    5.70
  -7  -2  10   49.60    3.80
  -7  -2  10   57.19    4.00
  -7  -2  10   54.49    5.10
   9  -7  10   53.89    4.80
  -1  -9 -10  157.88   11.00
  -9  10 -10  181.98   10.40
   9 -10  10  145.19    9.70
   9 -10  10  172.48   11.00
 -10   1  10  159.78    9.20
 -10   1  10  159.08   11.30
 -10   1  10  136.89    9.10
   1   9  10  158.08   11.50
  -9  13 -10    5.70    2.00
   0  10 -10   90.89    8.10
 -10   0 -10  105.49    7.70
  10 -10 -10   99.29    7.60
 -10   0 -10  104.69    7.70
   0 -10  10  104.69    8.00
 -10  10  10  103.19    8.60
 -10   3 -10   -0.50    0.90
   3   7 -10   -0.70    0.90
   7 -10 -10   -0.80    0.70
 -10   3 -10    1.50    1.20
  -7  10  10    0.80    1.40
  10  -3  10   -0.30    0.90
 -10   6 -10  116.59    7.40
 -10   6 -10   98.19    7.30
   4 -10 -10  109.99    8.40
  -6  -4  10  117.09    7.60
  -4  10  10  121.19    9.20
  -6  -4  10  136.99    8.90
  -6  -4  10  122.09    7.60
  10  -6  10  125.39    8.40
 -10   9 -10  161.08   10.00
   1 -10 -10  163.98   11.20
  -1  10  10  171.78   11.80
  -9  -1  10  144.99    9.40
  10  -9  10  150.88    9.40
  10  -9  10  159.08   10.90
  -9  -1  10  174.38   11.50
  -9  -1  10  164.18    9.50
 -10  12 -10   15.80    3.00
 -12   2  10   15.90    3.70
  12 -11 -10   65.69    5.70
 -11  -1 -10   57.59    5.70
 -11  -1 -10   46.60    5.80
 -12  11  10   50.79    8.20
   9 -11 -10   90.29    7.50
   2   9 -10  103.79    8.40
 -11   2 -10   98.99    7.40
 -11   2 -10   99.09    7.50
  -2  -9  10   93.59    7.50
  -9  11  10   98.89    8.50
 -11   5 -10   18.50    2.90
   6 -11 -10   13.00    3.00
   5   6 -10   15.00    3.50
  -6  11  10   18.60    3.80
  11  -5  10   13.20    2.90
 -11   8 -10   23.10    2.90
 -11   8 -10   21.00    3.10
   3 -11 -10   18.60    3.80
  11  -8  10   23.80    4.00
  -8  -3  10   18.10    2.70
  -8  -3  10   20.60    3.80
  -8  -3  10   20.70    2.90
  -3  11  10   23.30    4.30
 -11  11 -10   48.20    5.70
 -11   0  10   45.90    5.40
 -11   0  10   39.10    6.40
 -12   1 -10   77.39    6.50
  11 -12 -10   58.39    6.90
 -12   1 -10   55.29    6.50
   4   8 -10    9.30    2.90
   8 -12 -10   16.10    3.40
 -12   4 -10    9.60    2.90
 -12   4 -10   14.10    2.90
  -8  12  10   16.40    3.90
  -4  -8  10   10.10    2.50
   5 -12 -10   59.89    6.70
 -12   7 -10   69.19    5.10
  -7  -5  10   59.59    6.10
  -5  12  10   53.19    7.10
  12  -7  10   54.59    6.20
  -7  -5  10   59.09    5.10
 -10  -2  10   14.30    2.80
  13  -6  10    6.20    2.30
  -6  -7  10   17.50    3.10
  -1   1 -11    0.40    0.40
   0  -1 -11    0.40    0.40
  -1   1 -11    0.40    0.20
   0  -1 -11    0.40    0.40
   1   0 -11    0.30    0.20
   0  -1 -11    1.20    0.60
   1   0 -11    0.90    0.50
  -1   0  11    0.30    0.40
   1  -1  11    0.50    0.40
  -1   0  11    0.30    0.20
   0   1  11    0.30    0.30
   1  -1  11    0.50    0.30
   0   1  11   -0.10    0.40
   2  -2 -11   -0.10    0.60
   2  -2 -11    0.70    0.40
   0   2 -11    0.00    0.40
  -2   0 -11    0.60    0.60
   0   2 -11    0.60    0.50
  -2   0 -11    0.80    0.40
   0  -2  11    0.30    0.40
  -2   2  11    1.50    0.80
   2   0  11    0.10    0.40
  -2   2  11    0.50    0.40
   2   0  11    0.60    0.60
   0  -2  11    0.20    0.50
  -2   3 -11    5.90    0.80
  -1  -2 -11    5.60    1.20
  -1  -2 -11    4.40    1.00
   3  -1 -11    4.40    1.00
   2  -3  11    6.00    0.90
   1   2  11    4.90    1.10
   2  -3  11    6.10    1.10
   1   2  11    3.90    0.90
  -3   1  11    3.60    1.10
  -3  -1 -11  176.48   10.00
  -3  -1 -11  172.98    9.80
   4  -3 -11  165.38   10.00
   4  -3 -11  171.28    9.40
  -1   4 -11  168.18    9.80
  -1   4 -11  167.38    9.80
  -3  -1 -11  173.38   10.00
   1  -4  11  177.18    9.80
  -4   3  11  191.78   10.50
   3   1  11  184.28    9.80
   1  -4  11  178.08   10.20
  -4   3  11  171.68    9.40
  -3   2 -11    9.70    1.50
   1  -3 -11    4.90    1.10
   1  -3 -11    5.60    1.00
   2   1 -11    4.80    0.60
  -2  -1  11    5.70    1.20
  -2  -1  11    6.00    1.20
   3  -2  11    5.70    1.10
  -1   3  11    5.90    1.30
  -1   3  11    7.10    1.10
  -2  -1  11    5.50    0.60
  -3   5 -11  239.58   12.90
  -2  -3 -11  242.38   13.50
   5  -2 -11  217.88   13.20
   5  -2 -11  232.08   12.30
  -2  -3 -11  220.48   13.20
  -3   5 -11  235.68   13.30
   3  -5  11  252.57   13.40
   3  -5  11  240.18   13.00
   2   3  11  254.97   13.50
   2   3  11  238.78   13.20
  -5   2  11  240.78   13.60
  -5   2  11  237.38   12.40
  -4  -2 -11   82.09    5.80
   6  -4 -11   88.09    5.20
  -4  -2 -11   86.49    5.90
   6  -4 -11   89.49    6.00
  -2   6 -11   82.29    5.70
  -2   6 -11   87.69    5.80
  -4  -2 -11   97.09    6.00
  -6   4  11   82.09    5.50
  -6   4  11   90.69    6.30
   2  -6  11   82.19    5.80
   4   2  11   81.29    5.70
   2  -6  11   83.39    5.80
   3  -4 -11  172.78    9.50
   1   3 -11  174.08    9.80
   1   3 -11  167.88    9.30
  -4   1 -11  161.68    9.00
   3  -4 -11  172.58   10.00
  -4   1 -11  188.18    9.90
  -4   1 -11  169.58    9.10
   4  -1  11  181.18    9.90
  -3   4  11  167.68    9.40
  -1  -3  11  165.08    9.30
  -3   4  11  175.78   10.20
  -1  -3  11  155.78    9.80
  -4   4 -11   -0.10    0.30
   0  -4 -11    1.50    0.70
  -4   4 -11    0.50    0.60
   0  -4 -11   -0.60    0.50
   4  -4  11   -0.30    0.50
  -4   0  11    0.10    0.70
   4  -4  11   -0.30    0.40
   0   4  11    0.50    0.50
  -4   0  11    0.40    0.20
  -4   0  11    0.50    0.60
   0   4  11    0.60    0.70
  -4   0  11    0.50    0.30
  -4   7 -11    0.90    0.80
  -3  -4 -11    2.70    1.20
  -4   7 -11    2.00    1.00
   7  -3 -11    1.40    0.90
   7  -3 -11    0.10    0.40
   3   4  11    3.60    1.50
  -7   3  11    1.60    0.60
  -7   3  11    0.50    1.10
   4  -7  11    1.30    1.00
   4  -7  11   -0.10    0.70
   3   4  11    3.30    1.10
   8  -5 -11    0.80    0.70
  -5  -3 -11    1.10    0.90
  -3   8 -11    0.70    1.00
  -5  -3 -11    0.00    0.90
  -8   5  11    1.10    0.70
  -8   5  11    0.80    1.50
   3  -8  11    1.30    1.20
   3  -8  11    0.60    1.00
   5   3  11    0.60    1.10
   5  -5 -11   -0.80    0.50
   0   5 -11    0.30    0.60
  -5   0 -11    1.20    0.80
  -5   0 -11    0.20    0.70
   0   5 -11   -0.10    0.60
   5  -5 -11    0.10    0.70
  -5   0 -11    0.10    0.60
  -5   5  11   -0.10    0.80
  -5   5  11    0.20    0.50
   0  -5  11    0.60    0.80
   5   0  11    0.00    0.50
   0  -5  11    1.10    0.70
   2  -5 -11  236.98   13.60
   2  -5 -11  230.58   13.90
  -5   3 -11  216.48   12.70
  -5   3 -11  267.37   12.70
  -5   3 -11  244.98   13.70
   3   2 -11  249.08   12.80
  -3  -2  11  240.58   12.90
  -3  -2  11  260.77   14.00
  -2   5  11  275.67   14.30
   5  -3  11  245.18   13.60
  -2   5  11  227.08   13.40
  -3  -2  11  245.18   13.70
  -1  -5 -11  272.27   15.40
  -5   6 -11  241.48   16.60
  -5   6 -11  263.37   14.60
  -1  -5 -11  264.17   15.60
  -6   1  11  262.77   14.10
   1   5  11  271.07   15.70
   5  -6  11  288.87   15.50
   1   5  11  269.87   17.00
   5  -6  11  255.97   14.60
  -6   1  11  310.67   16.40
  -6   1  11  281.07   15.60
  -6   1  11  276.27   14.10
   9  -4 -11   43.20    3.20
  -4  -5 -11   33.80    4.20
  -5   9 -11   37.30    3.70
   5  -9  11   45.80    4.10
  -9   4  11   32.80    3.00
   5  -9  11   40.70    4.60
  10  -6 -11   10.10    1.90
  -6  -4 -11    6.70    1.90
  -4  10 -11    7.30    2.60
   4 -10  11   10.80    2.50
 -10   6  11    8.10    2.50
   6   4  11    7.90    2.20
 -10   6  11    6.50    1.60
  -6  -1 -11   82.89    6.20
  -1   7 -11   91.69    6.50
   7  -6 -11   97.69    6.60
  -1   7 -11   86.69    6.10
  -6  -1 -11   71.69    6.00
  -6  -1 -11   92.09    6.30
   7  -6 -11   94.89    5.90
   1  -7  11   94.19    6.30
  -7   6  11   92.89    5.90
   1  -7  11   82.69    6.40
   6   1  11   83.49    6.00
  -7   6  11   85.79    6.80
   4  -6 -11   96.49    5.80
  -6   2 -11   79.29    5.10
   4  -6 -11   96.29    6.30
   2   4 -11   94.79    6.20
  -6   2 -11   88.09    5.20
  -6   2 -11   87.09    5.80
   2   4 -11   77.69    5.20
  -4   6  11   79.89    5.50
  -2  -4  11   80.89    6.00
  -4   6  11   80.09    6.20
  -2  -4  11   79.29    5.30
   6  -2  11   90.09    5.90
  -6   5 -11  262.37   14.50
   1  -6 -11  276.17   15.50
  -5  -1  11  277.97   15.60
  -1   6  11  281.87   16.00
   6  -5  11  268.57   14.30
  -5  -1  11  275.57   14.30
   6  -5  11  277.67   15.40
  -5  -1  11  268.07   14.30
  -6   8 -11   51.59    4.10
  -2  -6 -11   52.49    4.60
  -8   2  11   45.20    3.30
  -8   2  11   48.10    3.40
   2   6  11   47.60    5.60
   6  -8  11   53.79    4.10
   6  -8  11   59.29    6.30
  -8   2  11   54.59    4.90
  -6  11 -11   44.50    5.40
  11  -5 -11   41.60    3.70
  -5  -6 -11   48.00    5.50
 -11   5  11   58.99    5.00
   5   6  11   48.10    5.90
   6 -11  11   38.60    5.10
 -11   5  11   53.09    6.60
  12  -7 -11    4.70    1.70
  -7  -5 -11    4.10    2.80
  -5  12 -11    6.00    2.20
   7   5  11    3.90    2.30
 -12   7  11    2.30    1.90
   5 -12  11    9.30    2.90
   9  -7 -11  170.28    9.70
  -2   9 -11  158.18   11.20
  -7  -2 -11  163.58   10.20
  -9   7  11  127.69   10.40
   7   2  11  154.98   10.10
  -9   7  11  157.58    9.70
   2  -9  11  164.78   10.40
  -7   1 -11   92.69    6.30
   6  -7 -11   90.89    6.10
   6  -7 -11   73.39    6.30
   1   6 -11   89.99    6.50
   1   6 -11   87.09    5.80
  -7   1 -11   84.19    5.70
  -7   1 -11   85.69    5.80
  -7   1 -11   86.49    6.20
  -1  -6  11   88.99    6.00
  -6   7  11   87.89    6.80
  -6   7  11   85.19    6.20
  -1  -6  11   90.49    6.70
  -7   4 -11    3.00    0.80
   4   3 -11    1.30    1.00
   3  -7 -11    0.40    0.80
  -7   4 -11    1.20    1.00
   3  -7 -11   -0.10    1.00
  -7   4 -11    1.80    0.80
   4   3 -11    2.10    0.70
  -4  -3  11    0.20    0.60
  -3   7  11    1.50    1.20
  -4  -3  11    0.30    0.80
  -3   7  11    2.50    1.10
   7  -4  11    1.70    1.00
  -4  -3  11    0.90    1.00
  -7   7 -11    0.30    0.70
   0  -7 -11   -0.20    0.90
   7  -7  11    1.60    0.80
  -7   0  11    1.60    1.20
   0   7  11   -0.10    1.10
  -7   0  11    1.10    0.70
   7  -7  11    0.70    0.90
  -7   0  11    1.20    0.50
  -3  -7 -11    3.50    1.70
  -7  10 -11    1.70    1.20
 -10   3  11   -0.30    1.40
 -10   3  11    2.70    0.90
   7 -10  11    1.20    1.30
 -10   3  11    3.10    1.10
   3   7  11    1.60    1.50
   7 -10  11    3.30    1.70
  -7  13 -11    2.70    1.80
 -13   6  11    1.80    2.30
 -13   6  11    2.00    1.70
  -8  -3 -11   13.60    2.90
  -3  11 -11   16.60    3.40
  11  -8 -11   13.90    2.50
  -8  -3 -11   11.30    2.60
 -11   8  11   16.10    3.60
   3 -11  11   18.80    3.60
   8   3  11   12.20    2.90
   8  -8 -11    6.20    1.60
   0   8 -11    7.80    2.20
   0  -8  11    6.90    1.70
  -8   8  11    5.90    2.10
   5  -8 -11    2.00    1.30
  -8   3 -11    0.40    0.80
   3   5 -11    1.10    1.30
   3   5 -11   -0.50    0.60
  -8   3 -11    1.90    0.90
  -3  -5  11    2.10    1.10
  -5   8  11    2.10    1.50
  -5   8  11    3.60    2.10
   8  -3  11    2.50    1.30
  -8   6 -11   54.09    3.80
   2  -8 -11   48.40    4.60
  -6  -2  11   48.70    4.60
   8  -6  11   51.39    4.50
  -6  -2  11   53.89    3.70
  -2   8  11   58.89    5.90
  -6  -2  11   53.89    3.70
   8  -6  11   48.70    3.40
  -8   9 -11   62.29    4.90
  -1  -8 -11   61.29    6.50
  -9   1  11   57.29    4.20
  -9   1  11   61.39    4.20
   8  -9  11   66.09    5.60
   1   8  11   66.19    6.10
   8  -9  11   66.99    4.90
  -9   1  11   68.69    6.10
  -4  -8 -11   21.00    3.70
  -8  12 -11   21.30    3.50
 -12   4  11   20.40    2.70
 -12   4  11   28.30    5.50
   4   8  11   25.20    4.30
   8 -12  11   19.90    3.80
  13  -9 -11    0.10    1.10
  -9  -1 -11    3.40    1.70
  -1  10 -11   -0.40    1.10
  -9  -1 -11    1.60    1.30
  10  -9 -11    0.20    0.90
   1 -10  11    1.10    1.20
 -10   9  11    2.70    1.90
  -9   2 -11  141.89    9.70
   7  -9 -11  159.68   11.10
   2   7 -11  163.28   10.80
  -9   2 -11  180.48   10.00
  -9   2 -11  159.38   10.30
  -2  -7  11  148.59    9.90
  -7   9  11  166.38   11.20
  -9   5 -11   33.20    4.30
   4  -9 -11   52.19    5.30
   5   4 -11   40.20    3.30
  -9   5 -11   37.70    3.20
  -5  -4  11   37.00    3.30
  -4   9  11   36.50    5.00
  -5  -4  11   47.10    4.40
   9  -5  11   48.40    4.20
   1  -9 -11   55.99    5.40
  -9   8 -11   65.59    4.70
  -8  -1  11   73.09    6.00
  -1   9  11   56.49    6.80
   9  -8  11   57.99    4.30
  -8  -1  11   65.59    4.30
  -8  -1  11   59.49    4.30
   9  -8  11   63.79    5.50
  -2  -9 -11    3.10    1.80
  -9  11 -11    2.00    1.30
 -11   2  11    1.20    0.80
   9 -11  11    2.60    1.70
 -11   2  11    3.20    2.10
   2   9  11    1.60    1.50
  -2  12 -11    2.80    1.90
  12 -10 -11    3.80    1.80
 -10  -2 -11    6.70    2.20
 -12  10  11    4.50    2.20
   9 -10 -11    3.20    1.50
 -10   1 -11    3.20    1.60
 -10   1 -11    1.00    1.30
   1   9 -11    3.00    1.70
  -9  10  11    1.60    1.70
  -1  -9  11    2.90    1.50
   6 -10 -11    6.00    1.90
 -10   4 -11   11.00    2.00
 -10   4 -11   10.00    2.10
   4   6 -11    8.10    2.50
  -6  10  11    4.50    2.00
  -4  -6  11    7.20    1.80
  10  -4  11    3.40    1.60
 -10   7 -11    4.30    1.30
 -10   7 -11    2.20    1.00
   3 -10 -11    2.20    1.40
  -7  -3  11    1.90    1.50
  -7  -3  11    2.20    1.00
  -3  10  11    3.00    1.90
  -7  -3  11    3.50    1.20
  10  -7  11    2.60    1.60
   0 -10 -11    1.60    1.50
 -10  10 -11    3.20    1.50
  10 -10  11    2.20    1.20
 -10   0  11    3.50    1.10
   0  10  11    2.10    1.80
 -10   0  11    3.60    1.90
 -11   0 -11    1.00    1.50
 -11   0 -11    0.60    1.30
  11 -11 -11    0.30    1.40
   0 -11  11    0.70    1.50
 -11  11  11    0.40    1.80
   8 -11 -11   16.70    3.10
   3   8 -11   23.80    4.70
 -11   3 -11   15.20    2.90
 -11   3 -11   14.20    2.70
  -3  -8  11   12.50    2.60
  -8  11  11   12.80    3.50
 -11   6 -11   41.60    3.70
   5 -11 -11   54.19    6.20
 -11   6 -11   50.39    4.00
  -6  -5  11   40.70    4.50
  11  -6  11   38.30    4.80
  -6  -5  11   45.00    5.70
  -5  11  11   47.90    6.50
 -11   9 -11    1.80    1.10
   2 -11 -11    6.10    2.30
  -9  -2  11    2.50    1.90
  -9  -2  11    1.50    1.00
  -2  11  11    4.80    2.30
 -12   2 -11    6.40    2.10
 -12   2 -11    3.40    1.90
  10 -12 -11    3.30    1.90
  -2 -10  11    1.00    1.40
 -10  12  11    3.70    2.20
   7 -12 -11    3.70    2.00
 -12   5 -11    3.50    1.60
   5   7 -11    5.30    2.40
  12  -5  11    2.50    1.60
  -7  12  11    4.60    2.30
  -5  -7  11    7.00    2.10
   4 -12 -11   26.20    4.40
 -12   8 -11   19.80    2.90
  -8  -4  11   24.00    4.40
  12  -8  11   18.30    3.40
  -4  12  11   23.40    4.70
  -8  -4  11   23.00    3.10
  -4  -9  11    0.90    1.50
  13  -7  11    1.60    1.60
  -7  -6  11    2.20    1.50
  -6  -8  11   -0.10    1.60
   0   0 -12 2225.68  124.39
   0   0 -12 2353.16  125.19
   0   0  12 2341.47  125.39
  -1  -1 -12 1451.05   82.29
   2  -1 -12 1437.96   82.79
  -1  -1 -12 1512.15   83.99
  -1   2 -12 1519.05   84.59
  -1   2 -12 1456.85   81.89
   2  -1 -12 1466.45   83.99
   1  -2  12 1442.16   82.19
   1   1  12 1421.06   82.09
   1   1 -12 1538.35   83.69
   1   1 -12 1474.95   80.99
   1  -2 -12 1389.26   82.29
  -2   1 -12 1478.25   82.49
   1  -2 -12 1559.54   86.09
  -2   1 -12 1538.55   81.29
  -1   2  12 1425.66   85.19
  -1   2  12 1428.06   82.89
  -1  -1  12 1270.47   81.19
  -1  -1  12 1462.05   83.59
   2  -1  12 1443.06   81.79
  -2  -2 -12  693.43   34.90
  -2  -2 -12  654.73   34.80
   4  -2 -12  674.53   34.90
  -2   4 -12  654.53   34.70
  -2  -2 -12  693.73   34.90
   2  -4  12  641.54   34.40
   2   2  12  653.53   34.70
   2  -4  12  675.53   34.70
  -4   2  12  655.93   35.10
  -4   2  12  683.03   33.90
   2   2  12  709.93   34.90
  -3   0 -12 3527.55  187.28
   0   3 -12 3627.34  192.38
   0   3 -12 3560.84  191.28
   3  -3 -12 3165.48  198.08
   3  -3 -12 3341.57  189.88
  -3   3  12 3799.92  196.18
   0  -3  12 3623.24  193.08
  -3   3  12 3678.53  191.88
   0  -3  12 3860.61  191.38
   3   0  12 3479.25  185.98
   3   0  12 3712.63  187.88
   3   0 -12 1832.32   96.99
   3   0 -12 1748.93   94.99
  -3   3 -12 1770.92   96.49
   0  -3 -12 1741.43  100.69
  -3   3 -12 1551.84   97.89
   0  -3 -12 1630.64   96.39
   0   3  12 1879.21   98.49
   3  -3  12 1761.22   98.59
   3  -3  12 1739.13   96.09
  -3   0  12 1696.73   97.79
   0   3  12 1613.34   99.79
  -3   0  12 1670.33   97.09
  -3  -3 -12    0.80    0.70
   6  -3 -12    2.60    0.60
  -3  -3 -12    1.00    0.90
  -3  -3 -12   -0.20    0.60
   6  -3 -12    2.00    1.00
  -3   6 -12    1.20    0.90
  -3   6 -12    1.80    0.80
   3   3  12    1.70    0.80
   3  -6  12    0.70    0.70
   3   3  12    2.20    1.10
   3  -6  12    1.50    0.80
  -6   3  12   -1.10    0.90
  -6   3  12    0.90    0.50
  -4  -1 -12  175.48   10.00
  -4  -1 -12  175.08   10.20
  -4  -1 -12  172.98   10.20
  -1   5 -12  180.98   10.10
   5  -4 -12  162.98    9.60
   5  -4 -12  192.38   10.50
  -1   5 -12  178.18   10.60
   1  -5  12  170.98   10.00
  -5   4  12  168.08    9.60
   1  -5  12  175.18   10.20
   4   1  12  171.38    9.90
  -5   4  12  173.18   10.60
   2  -4 -12  640.24   34.60
   2  -4 -12  655.33   34.10
   2   2 -12  664.23   33.60
  -4   2 -12  672.13   34.30
  -4   2 -12  665.53   33.30
   4  -2  12  658.93   34.30
  -2  -2  12  685.63   33.60
  -2   4  12  643.24   34.70
  -2  -2  12  647.54   34.40
  -2   4  12  677.13   34.10
  -4   5 -12   85.19    5.70
  -1  -4 -12   88.49    6.00
  -4   5 -12   86.09    5.10
  -1  -4 -12   90.09    5.80
   5  -1 -12   69.79    5.50
  -5   1  12   87.19    6.00
   4  -5  12   82.59    5.70
   1   4  12   83.89    6.00
   4  -5  12   91.29    5.20
  -5   1  12   83.79    4.60
  -5   1  12   90.79    4.60
   1   4  12   81.49    5.50
   8  -4 -12  535.25   29.00
  -4  -4 -12  501.95   30.20
  -4  -4 -12  574.44   30.30
  -4   8 -12  575.34   30.00
   4  -8  12  558.94   30.00
   4   4  12  606.34   30.60
  -8   4  12  565.84   29.10
   4  -8  12  571.34   30.30
  -8   4  12  551.74   30.70
  -5  -2 -12  382.56   22.90
   7  -5 -12  427.56   22.80
  -2   7 -12  451.85   23.10
  -5  -2 -12  401.46   22.90
  -2   7 -12  406.76   22.90
  -5  -2 -12  432.26   23.10
   7  -5 -12  438.26   23.20
   5   2  12  411.06   22.90
   2  -7  12  398.06   23.00
   2  -7  12  440.96   23.10
  -7   5  12  439.46   23.70
  -7   5  12  427.66   22.30
   4  -5 -12  166.28   10.30
  -5   1 -12  163.28    9.90
  -5   1 -12  166.58    9.30
   1   4 -12  164.88   10.00
  -5   1 -12  180.18    9.30
   1   4 -12  162.58    9.50
  -4   5  12  180.88    9.70
  -4   5  12  187.78   10.60
   5  -1  12  166.28   10.00
  -1  -4  12  164.28    9.50
  -1  -4  12  164.28   10.10
  -5   4 -12   86.29    5.90
  -5   4 -12   90.79    4.90
   1  -5 -12   99.19    6.00
   1  -5 -12   88.59    6.20
  -1   5  12   88.69    5.70
  -4  -1  12   88.49    6.10
  -1   5  12   83.69    6.20
  -4  -1  12   87.19    4.90
   5  -4  12   82.69    4.80
   5  -4  12   91.89    5.90
  -4  -1  12  108.79    6.30
  -4  -1  12   84.59    4.90
  -5   7 -12  106.79    6.90
   7  -2 -12  118.79    7.50
  -2  -5 -12  115.09    7.80
  -2  -5 -12  109.09    7.50
  -5   7 -12  112.19    7.50
  -7   2  12  103.79    6.20
   2   5  12  107.59    7.20
  -7   2  12  121.39    7.90
   5  -7  12  117.39    7.50
   2   5  12  118.09    7.90
   5  -7  12  106.49    6.90
  -7   2  12  107.09    6.30
  -7   2  12  110.39    7.60
  10  -5 -12  191.08   10.80
  -5  10 -12  178.88   11.80
  -5  -5 -12  189.68   12.10
   5 -10  12  191.38   12.10
 -10   5  12  174.68   12.50
   5   5  12  201.28   12.50
 -10   5  12  180.18   10.80
   9  -6 -12  145.09    9.20
  -6  -3 -12  155.18   10.10
  -3   9 -12  170.38   10.40
   3  -9  12  173.38   10.40
  -9   6  12  155.78   10.80
  -9   6  12  154.08    9.30
   6   3  12  146.29   10.10
   0   6 -12  552.54   30.60
   0   6 -12  553.24   30.20
  -6   0 -12  587.14   30.00
  -6   0 -12  597.04   30.30
  -6   0 -12  554.04   30.50
   6  -6 -12  589.84   30.20
  -6   0 -12  550.34   30.50
  -6   6  12  543.95   30.00
   6   0  12  582.34   30.10
   0  -6  12  577.84   30.30
  -6   6  12  617.14   31.40
   3   3 -12    1.60    0.90
   3  -6 -12    1.10    1.10
  -6   3 -12    0.70    0.80
  -6   3 -12    1.40    0.60
   3   3 -12    1.50    0.70
  -6   3 -12    1.20    0.50
   3  -6 -12    0.90    0.70
  -3   6  12    1.30    0.80
   6  -3  12   -0.30    0.70
  -3  -3  12    2.40    1.10
  -3  -3  12    1.80    0.60
  -3   6  12    2.20    1.20
  -3  -3  12   -0.20    0.70
  -6   6 -12  150.68    8.20
   0  -6 -12  136.09    9.00
   0  -6 -12  129.69    9.20
  -6   6 -12  133.59    8.90
   6  -6  12  147.39    9.00
   6  -6  12  134.39    8.00
   0   6  12  142.19    8.80
  -6   0  12  161.98    9.50
   0   6  12  139.49    9.40
  -6   0  12  149.79    7.80
  -6   0  12  136.19    7.70
  -6   0  12  145.89    9.20
  -6   9 -12   44.40    3.90
  -3  -6 -12   42.60    5.10
   3   6  12   51.09    4.90
   6  -9  12   42.40    3.90
   6  -9  12   33.90    4.40
  -9   3  12   39.60    3.20
  -9   3  12   49.40    3.40
  -9   3  12   48.30    5.80
  -6  -6 -12   86.09    7.40
  12  -6 -12   80.19    6.00
  -6  12 -12   94.19    7.40
   6 -12  12   94.09    7.70
 -12   6  12   87.59    8.70
   6   6  12   88.69   11.40
  -4  11 -12   19.30    3.60
  -7  -4 -12   24.60    4.10
  11  -7 -12   24.00    3.00
 -11   7  12   26.90    4.60
   4 -11  12   26.30    4.20
   7   4  12   17.80    3.40
   8  -7 -12  191.68   11.20
  -1   8 -12  192.18   11.90
  -7  -1 -12  197.08   11.40
  -7  -1 -12  182.78   11.60
  -7  -1 -12  177.28   11.60
  -8   7  12  158.98   12.50
  -8   7  12  192.38   11.20
   1  -8  12  199.38   11.80
   7   1  12  202.98   11.60
  -7   2 -12  373.36   21.30
   5  -7 -12  415.76   22.70
   2   5 -12  406.96   21.50
  -7   2 -12  345.97   21.90
  -7   2 -12  397.16   21.30
   5  -7 -12  437.66   22.10
   2   5 -12  404.46   22.40
  -5   7  12  451.25   23.10
   7  -2  12  396.06   22.10
  -2  -5  12  425.16   21.70
  -2  -5  12  397.16   22.50
   2  -7 -12  105.59    7.70
  -7   5 -12  117.19    6.50
   2  -7 -12  109.49    7.50
  -7   5 -12  112.29    7.50
  -5  -2  12  107.39    6.40
   7  -5  12  112.09    6.20
  -2   7  12  118.39    7.30
  -5  -2  12  109.79    6.50
  -5  -2  12   88.19    7.10
  -2   7  12  106.19    7.90
   7  -5  12  130.29    7.60
  -5  -2  12  108.59    7.70
  -1  -7 -12   -0.40    1.00
  -7   8 -12    3.60    1.20
  -8   1  12    1.60    0.60
  -8   1  12    3.20    1.60
   7  -8  12    4.10    1.60
   7  -8  12    3.00    1.20
   1   7  12    1.10    1.30
  -4  -7 -12   35.50    4.90
 -11   4  12   30.50    5.10
   4   7  12   36.40    5.30
 -11   4  12   28.10    3.10
 -11   4  12   31.00    2.80
   7 -11  12   27.80    4.20
  -5  13 -12   14.90    3.30
  13  -8 -12   19.50    2.90
 -13   8  12   11.10    3.90
  10  -8 -12   13.60    2.40
  -8  -2 -12   11.80    2.40
  -2  10 -12   12.60    2.90
  -8  -2 -12   11.50    2.70
 -10   8  12   16.40    3.50
   2 -10  12   12.60    2.70
   1   7 -12  180.68   11.10
  -8   1 -12  203.58   11.70
  -8   1 -12  182.48   11.10
  -8   1 -12  194.58   11.10
   7  -8 -12  181.98   11.30
  -1  -7  12  191.28   11.40
  -7   8  12  175.68   11.60
   4   4 -12  544.85   28.80
  -8   4 -12  530.75   28.70
   4  -8 -12  563.54   29.80
   4   4 -12  574.94   30.20
  -4  -4  12  574.54   29.00
   8  -4  12  561.24   29.80
  -4  -4  12  531.35   29.80
  -4   8  12  532.55   30.40
  -8   7 -12    2.30    0.90
   1  -8 -12    1.10    1.10
  -7  -1  12    3.00    0.90
  -7  -1  12    4.10    1.00
   8  -7  12    2.90    0.80
  -7  -1  12    3.10    1.60
  -1   8  12    1.00    1.50
   8  -7  12    2.70    1.30
  -8  10 -12   13.10    2.40
  -2  -8 -12   14.40    2.90
 -10   2  12   11.30    1.60
   8 -10  12   10.20    2.20
 -10   2  12   11.40    1.70
   2   8  12   10.50    2.80
 -10   2  12    5.10    2.30
   8 -10  12   12.50    2.80
  -8  13 -12   33.70    4.70
  -9  -3 -12   27.40    4.60
  -3  12 -12   45.00    5.80
  12  -9 -12   49.40    4.40
  -9  -3 -12   34.10    4.90
   3 -12  12   50.59    6.10
 -12   9  12   48.60    6.70
   9  -9 -12   54.89    5.00
   0   9 -12   54.49    5.50
  -9   0 -12   65.49    5.40
  -9   0 -12   62.49    5.10
   0  -9  12   64.89    5.50
  -9   9  12   66.89    6.20
  -9   3 -12  129.69    9.00
   3   6 -12  146.99    9.20
  -9   3 -12  160.98    9.20
   6  -9 -12  152.28   10.50
   3   6 -12  154.38   10.40
  -3  -6  12  155.68    9.50
  -6   9  12  166.78   10.90
   9  -3  12  155.28    9.90
   3  -9 -12   50.59    4.60
  -9   6 -12   48.40    3.50
  -9   6 -12   40.00    3.40
  -6  -3  12   44.80    4.50
   9  -6  12   48.70    5.30
  -6  -3  12   44.90    3.50
  -3   9  12   56.39    6.60
  -6  -3  12   50.19    3.60
   0  -9 -12  112.59    8.20
  -9   9 -12  102.69    6.80
   9  -9  12   94.69    6.40
  -9   0  12  101.89    8.10
  -9   0  12   98.69    6.20
  -9   0  12  108.19    6.20
   9  -9  12   95.69    7.60
   0   9  12   90.99    8.00
  -9  12 -12   42.70    4.30
 -12   3  12   34.60    5.50
  11 -10 -12   47.80    5.30
 -10  -1 -12   43.00    5.30
  -1  11 -12   42.10    5.90
   1 -11  12   50.09    5.80
 -10   2 -12   16.30    2.60
   8 -10 -12   13.60    2.70
   2   8 -12    8.50    2.40
 -10   2 -12   12.20    2.70
 -10   2 -12   11.70    2.40
  -8  10  12   17.00    3.70
  -2  -8  12    9.90    2.30
 -10   5 -12  187.38   11.10
 -10   5 -12  186.48   11.20
   5 -10 -12  192.38   12.40
   5   5 -12  167.98   11.10
   5   5 -12  223.28   13.20
  -5  -5  12  204.48   11.60
  -5  -5  12  196.38   12.50
  10  -5  12  210.18   12.40
  -5  10  12  193.48   13.20
 -10   8 -12   13.20    2.20
   2 -10 -12    8.10    2.30
  -8  -2  12   13.40    2.00
  -2  10  12    8.30    2.80
  10  -8  12   11.10    1.70
  -8  -2  12    8.70    2.60
  10  -8  12    5.80    2.00
  -8  -2  12   12.70    1.90
 -10  11 -12  127.49    8.40
  -1 -10 -12  124.29    9.60
 -11   1  12  111.79    9.60
  10 -11  12  123.69    9.30
   1  10  12  125.39   10.10
 -11   1  12  116.79    7.30
  13 -11 -12    3.70    1.90
   1  10 -12   54.39    6.80
 -11   1 -12   40.00    6.10
  10 -11 -12   37.40    4.80
 -11   1 -12   39.50    5.00
 -10  11  12   42.00    6.30
  -1 -10  12   44.40    5.40
   4   7 -12   22.00    3.80
   7 -11 -12   22.50    3.80
 -11   4 -12   21.70    3.50
 -11   4 -12   21.20    3.10
  11  -4  12   18.60    3.30
  -7  11  12   24.50    4.60
  -4  -7  12   28.30    3.70
 -11   7 -12   26.60    3.10
 -11   7 -12   31.40    3.00
   4 -11 -12   28.60    4.30
  -7  -4  12   27.50    3.40
  -7  -4  12   30.30    4.50
  -4  11  12   31.10    5.00
  11  -7  12   28.40    4.10
  -7  -4  12   28.00    3.40
 -11  10 -12  121.29    8.00
   1 -11 -12  118.29    9.40
 -10  -1  12  118.09    7.40
  11 -10  12  125.79    9.30
 -10  -1  12  114.29    9.50
  -1  11  12  120.09   10.00
 -12   0 -12    8.20    2.70
 -12   3 -12   48.10    4.70
 -12   3 -12   42.00    5.30
   9 -12 -12   45.70    5.60
  -3  -9  12   42.00    5.30
  -9  12  12   44.80    6.40
   6 -12 -12   87.59    7.70
 -12   6 -12   98.89    6.60
  12  -6  12   86.79   10.90
  -6  -6  12   99.29    7.00
  -6  -6  12  102.79    8.10
  -6  12  12   78.89    8.10
  -9  -3  12   38.30    3.50
  12  -9  12   39.10    5.40
  -5  -8  12   18.80    3.40
  13  -5  12   12.60    3.80
  -8  -5  12   32.60    5.50
   1  -1 -13   -0.60    0.40
   0   1 -13    0.10    0.30
  -1   0 -13    0.20    0.40
   1  -1 -13    0.30    0.30
  -1   0 -13   -0.10    0.30
   0   1 -13    0.00    0.30
   1  -1 -13    0.70    0.30
   0  -1  13   -0.20    0.30
  -1   1  13    0.30    0.50
   0  -1  13    0.40    0.40
   1   0  13    0.10    0.40
   1   0  13    0.20    0.30
  -1   3 -13   85.39    5.20
   3  -2 -13   87.89    4.70
  -2  -1 -13   80.69    5.30
  -1   3 -13   86.59    5.10
   3  -2 -13   90.89    5.50
  -2  -1 -13   90.59    5.20
  -2  -1 -13   79.19    5.30
  -3   2  13   91.09    5.70
   1  -3  13   91.29    5.20
  -3   2  13   88.39    4.70
   1  -3  13   86.29    5.10
   2   1  13   70.49    5.00
   0  -2 -13    0.00    0.40
  -2   2 -13    0.00    0.40
   2   0 -13   -0.10    0.40
   0  -2 -13    0.80    0.70
   0   2  13    0.10    0.60
   2  -2  13    0.40    0.20
   2  -2  13    0.30    0.20
   0   2  13    0.20    0.40
  -2   0  13    2.60    0.90
   2  -2  13    0.40    0.50
  -3  -2 -13  383.26   20.70
  -2   5 -13  382.96   20.70
   5  -3 -13  404.36   21.00
  -3  -2 -13  395.46   20.80
  -2   5 -13  366.46   20.40
  -3  -2 -13  371.46   20.70
   5  -3 -13  377.96   19.90
   2  -5  13  368.56   20.50
   3   2  13  415.66   20.80
  -5   3  13  385.36   21.20
   2  -5  13  390.76   20.70
  -5   3  13  388.96   19.90
   2  -3 -13   89.89    5.20
  -3   1 -13   83.09    4.70
   2  -3 -13   89.09    5.70
   1   2 -13   85.89    4.90
  -3   1 -13   81.89    5.40
   3  -1  13   90.89    4.70
  -2   3  13   87.59    5.10
  -1  -2  13   84.69    5.30
   3  -1  13   88.29    5.50
  -1  -2  13   88.49    4.90
  -1  -2  13   85.69    5.80
  -2   3  13   97.69    5.90
  -3   4 -13  104.09    5.30
  -1  -3 -13   91.59    5.80
   4  -1 -13   73.89    5.60
  -3   4 -13  102.59    6.00
  -1  -3 -13   83.49    5.90
   1   3  13   84.49    5.70
   1   3  13   84.59    5.90
   3  -4  13  103.49    5.30
   3  -4  13  101.89    5.90
  -4   1  13   85.79    6.00
  -4  -3 -13   25.80    3.30
  -3   7 -13   33.10    3.80
   7  -4 -13   29.00    2.30
   7  -4 -13   30.50    3.10
  -3   7 -13   27.40    2.90
  -4  -3 -13   27.10    3.30
  -4  -3 -13   26.10    3.30
   3  -7  13   28.40    2.90
  -7   4  13   28.80    3.90
   3  -7  13   30.00    3.70
  -7   4  13   26.00    2.30
   4   3  13   32.90    3.20
   4  -4 -13    0.30    0.40
  -4   0 -13   -0.60    0.40
  -4   0 -13    0.50    0.60
   0   4 -13    0.10    0.70
   4  -4 -13    0.90    0.90
  -4   0 -13    0.20    0.40
   0   4 -13   -0.20    0.40
  -4   4  13   -0.20    0.70
   0  -4  13   -0.30    0.40
   0  -4  13   -0.60    0.40
  -4   4  13   -0.20    0.40
   4   0  13   -0.10    0.40
   1  -4 -13  109.59    6.20
  -4   3 -13   81.79    5.70
   1  -4 -13  109.29    6.30
   3   1 -13   90.09    4.80
  -3  -1  13   79.99    5.70
  -1   4  13   98.79    6.20
  -3  -1  13   81.49    5.80
  -1   4  13  102.19    5.70
  -3  -1  13   86.09    4.80
   4  -3  13   78.19    5.60
  -4   6 -13  220.38   12.80
  -2  -4 -13  234.38   12.90
  -4   6 -13  222.08   12.20
  -2  -4 -13  179.88   12.60
   6  -2 -13  213.88   11.50
   6  -2 -13  214.48   12.70
   4  -6  13  250.27   12.90
   2   4  13  245.98   13.20
  -6   2  13  208.28   13.00
  -6   2  13  222.38   11.50
   4  -6  13  224.28   12.80
   9  -5 -13    5.60    1.20
  -5  -4 -13    5.50    1.70
  -4   9 -13    6.80    1.90
   5   4  13    5.30    2.10
  -9   5  13    6.50    2.20
   4  -9  13    7.50    2.00
  -9   5  13    5.90    1.30
   4  -9  13    4.70    1.90
  -1   6 -13  167.08    9.80
   6  -5 -13  169.18   10.20
   6  -5 -13  165.88    9.40
  -1   6 -13  157.98    9.90
  -5  -1 -13  166.58    9.80
  -5  -1 -13  147.79   10.10
   1  -6  13  152.28   10.00
   1  -6  13  169.28    9.90
   5   1  13  178.08    9.80
  -6   5  13  169.48    9.40
  -6   5  13  161.38   10.50
  -5   2 -13  380.86   19.10
   2   3 -13  391.16   19.40
   2   3 -13  401.86   20.30
   3  -5 -13  378.26   19.90
   3  -5 -13  328.07   20.20
  -5   2 -13  396.76   19.10
  -5   2 -13  347.27   20.00
   5  -2  13  389.76   20.10
  -3   5  13  343.57   20.40
  -2  -3  13  343.97   20.10
  -3   5  13  366.66   19.80
  -2  -3  13  374.06   19.40
  -5   5 -13   -0.10    0.60
   0  -5 -13   -0.40    0.70
   0  -5 -13   -0.30    0.60
  -5   5 -13    0.20    0.40
   5  -5  13    1.60    1.00
  -5   0  13    0.70    0.30
   5  -5  13    0.30    0.40
   0   5  13    1.30    0.70
  -5   0  13   -0.40    0.50
   0   5  13    0.60    0.90
  -5   0  13    0.00    0.20
  -5   0  13    0.10    0.90
  -5   8 -13    1.30    0.80
   8  -3 -13   -0.60    0.40
  -3  -5 -13    2.30    1.30
  -8   3  13    2.20    1.50
   5  -8  13    2.50    1.30
  -8   3  13    1.10    0.60
   3   5  13    1.40    1.40
   5  -8  13    4.50    1.20
  -5  11 -13   31.70    4.30
  11  -6 -13   20.30    2.80
  -6  -5 -13   25.60    4.10
 -11   6  13   27.00    4.80
   5 -11  13   23.90    3.80
 -11   6  13   28.70    3.20
   6   5  13   21.40    4.00
  -6  -2 -13   76.59    6.20
  -2   8 -13   84.89    6.40
  -6  -2 -13   86.49    6.30
   8  -6 -13   91.89    5.80
   6   2  13   88.79    6.30
  -8   6  13   96.99    7.30
   2  -8  13   82.69    6.50
   2  -8  13   79.69    6.30
  -8   6  13   85.49    5.70
   5  -6 -13  180.18   10.90
   5  -6 -13  180.68   10.30
  -6   1 -13  176.68    9.70
   1   5 -13  176.98   10.00
   1   5 -13  181.28   10.70
  -6   1 -13  185.28   11.30
  -5   6  13  169.48   10.10
   6  -1  13  155.58   10.30
  -5   6  13  166.48   11.00
  -1  -5  13  167.68   10.70
  -1  -5  13  177.68   10.10
  -6   4 -13  208.38   11.30
  -6   4 -13  214.38   11.20
   4   2 -13  215.38   11.40
  -6   4 -13  206.08   13.00
   2  -6 -13  224.78   12.50
  -2   6  13  201.18   12.20
   6  -4  13  200.98   12.40
  -4  -2  13  225.78   11.50
  -2   6  13  227.28   13.10
  -4  -2  13  227.38   12.60
  -1  -6 -13    5.90    1.70
  -6   7 -13    7.90    1.50
   6  -7  13    6.20    1.40
  -7   1  13    6.00    0.90
   6  -7  13   11.60    2.20
   1   6  13    6.10    2.00
  -7   1  13    5.70    1.90
  -7   1  13    8.20    1.10
  10  -4 -13   33.20    2.80
  -4  -6 -13   44.50    5.20
  -6  10 -13   37.20    4.30
   6 -10  13   31.60    4.10
   4   6  13   31.90    4.50
 -10   4  13   26.80    4.30
 -10   4  13   34.40    2.80
   6 -10  13   28.70    4.20
  -7  -3 -13    7.30    2.20
  10  -7 -13    5.20    1.40
  -3  10 -13    6.40    2.10
   3 -10  13    7.60    2.30
   7   3  13    8.60    2.40
 -10   7  13    6.50    1.70
 -10   7  13    9.00    2.80
  -7   0 -13    0.40    0.80
   7  -7 -13    2.30    1.20
   0   7 -13    0.10    1.10
  -7   0 -13    1.60    1.10
   0   7 -13    2.50    1.10
  -7   0 -13    0.80    1.00
   0  -7  13    0.80    0.90
  -7   7  13    0.50    0.90
  -7   7  13    0.00    1.00
  -7   3 -13   29.30    2.30
  -7   3 -13   26.90    2.20
   3   4 -13   21.60    3.10
   3   4 -13   26.70    2.30
   4  -7 -13   28.20    3.80
  -7   3 -13   33.50    3.80
   4  -7 -13   21.90    3.00
  -4   7  13   27.00    3.20
  -3  -4  13   28.10    3.80
   7  -3  13   26.60    3.30
  -3  -4  13   29.30    2.70
  -4   7  13   22.40    3.70
   1  -7 -13    7.50    2.00
  -7   6 -13    7.50    1.30
  -1   7  13    8.40    2.30
  -6  -1  13    8.10    2.00
  -6  -1  13    7.80    1.20
   7  -6  13    8.80    1.20
   7  -6  13    8.90    2.00
  -6  -1  13    9.10    1.30
  -7   9 -13   87.79    6.10
  -2  -7 -13   86.99    6.90
  -9   2  13   80.49    5.20
  -9   2  13   97.99    7.40
   7  -9  13   84.59    6.00
   7  -9  13   86.19    6.70
  -9   2  13   84.09    5.20
   2   7  13   95.29    7.40
  -5  -7 -13    7.70    2.50
  -7  12 -13    6.30    2.10
 -12   5  13    9.80    3.20
 -12   5  13   10.60    1.90
   7 -12  13   12.00    3.20
   5   7  13    8.60    2.70
  -8  -4 -13   29.80    4.50
  12  -8 -13   23.40    3.20
  -4  12 -13   29.20    4.70
   4 -12  13   20.50    3.90
   8   4  13   32.80    5.10
 -12   8  13   31.70    5.30
   9  -8 -13   51.79    4.40
  -8  -1 -13   48.20    4.50
  -1   9 -13   57.39    5.20
  -8  -1 -13   59.49    5.00
  -9   8  13   58.59    5.70
   1  -9  13   50.39    4.80
  -8   2 -13   84.69    5.70
  -8   2 -13   91.09    5.90
   6  -8 -13   85.09    6.30
   2   6 -13   80.09    6.70
   8  -2  13   94.79    6.60
  -6   8  13   89.69    7.50
  -6   8  13   87.89    6.40
  -2  -6  13   88.29    6.10
  -8   5 -13    3.10    0.90
  -8   5 -13    1.90    0.80
   3  -8 -13    3.30    1.50
   8  -5  13    3.20    1.30
  -5  -3  13    0.40    0.60
  -5  -3  13    1.60    0.80
  -3   8  13    3.30    1.70
  -5  -3  13    0.70    1.20
   0  -8 -13   -0.80    0.90
  -8   8 -13    1.40    1.00
   8  -8  13   -0.10    0.60
   8  -8  13    0.10    1.10
  -8   0  13    0.40    0.50
   0   8  13   -0.10    1.30
  -8   0  13   -0.40    1.00
  -8  11 -13   20.00    3.20
   8 -11  13   17.00    3.50
   3   8  13   17.90    3.90
 -11   3  13   20.40    2.30
 -11   3  13   24.80    4.50
  -9  -2 -13    4.20    1.90
  -2  11 -13    7.20    2.30
  11  -9 -13    5.80    1.80
  -9  -2 -13    7.30    2.20
 -11   9  13    2.20    1.80
  -9   1 -13   58.39    5.00
   8  -9 -13   56.29    4.90
  -9   1 -13   58.29    4.60
  -9   1 -13   48.50    4.50
   1   8 -13   53.09    5.30
  -1  -8  13   52.99    4.70
  -8   9  13   54.99    6.70
   5  -9 -13    4.20    1.70
   4   5 -13    3.70    2.00
  -9   4 -13    9.60    1.70
  -9   4 -13    5.00    1.30
   4   5 -13    3.90    1.20
  -4  -5  13    8.30    1.70
   9  -4  13   10.50    2.40
  -5   9  13    5.10    2.10
  -9   7 -13   84.59    5.60
   2  -9 -13   89.19    6.90
  -7  -2  13   94.39    5.60
  -7  -2  13   89.79    5.80
   9  -7  13   75.59    6.50
   9  -7  13   82.99    5.20
  -7  -2  13   89.89    7.10
  -2   9  13  100.49    7.70
  -1  -9 -13    6.40    2.40
  -9  10 -13    5.70    1.70
 -10   1  13    7.30    1.30
   1   9  13    6.70    2.30
 -10   1  13    6.70    1.60
   9 -10  13    9.10    2.70
   9 -10  13    6.80    2.00
 -10   1  13    5.90    2.40
  -9  13 -13    0.60    1.30
  13 -10 -13    1.40    1.40
   0  10 -13    1.10    1.50
 -10   0 -13    1.20    1.30
 -10   0 -13    2.50    1.40
  10 -10 -13    2.10    1.50
   0 -10  13    0.50    1.60
 -10  10  13    1.00    1.80
   7 -10 -13    5.80    1.90
 -10   3 -13    4.20    1.40
   3   7 -13    2.90    1.70
 -10   3 -13    9.30    2.00
  10  -3  13    5.40    1.90
  -3  -7  13    5.80    1.70
  -7  10  13    7.20    2.60
 -10   6 -13   36.90    2.90
   4 -10 -13   36.40    4.50
  10  -6  13   36.30    4.50
  -6  -4  13   34.10    3.10
  -4  10  13   31.40    5.10
  -6  -4  13   31.20    3.00
  -6  -4  13   28.20    4.10
   1 -10 -13    6.70    2.20
 -10   9 -13   10.10    2.00
  -9  -1  13    8.10    1.50
  10  -9  13    8.20    1.50
  -9  -1  13    6.10    2.30
  10  -9  13    7.80    2.50
  -9  -1  13    6.70    1.40
  -1  10  13   11.20    3.20
 -10  12 -13    2.20    1.50
  12 -11 -13    0.00    1.10
 -11  -1 -13    0.50    1.60
   9 -11 -13    3.90    1.80
   2   9 -13    2.80    2.00
 -11   2 -13    4.70    2.00
 -11   2 -13    6.90    2.10
  -2  -9  13    2.80    1.70
   5   6 -13   26.80    4.30
   6 -11 -13   27.30    4.10
 -11   5 -13   29.70    3.40
 -11   5 -13   25.90    3.10
  -5  -6  13   25.50    3.50
  -5  -6  13   23.10    4.00
  11  -5  13   23.40    3.60
  -6  11  13   21.10    4.40
 -11   8 -13   23.60    2.80
   3 -11 -13   24.10    4.40
  -8  -3  13   25.50    5.30
  -8  -3  13   21.90    2.80
  -3  11  13   23.50    5.00
  11  -8  13   20.80    3.80
 -12   1 -13   -0.90    1.20
  11 -12 -13    0.20    1.30
 -12   4 -13   27.60    4.40
 -12   4 -13   26.60    3.70
   8 -12 -13   21.30    4.00
   4   8 -13   31.10    7.40
  -4  -8  13   32.40    4.20
  -8  12  13   22.90    4.70
   5 -12 -13    5.60    2.20
 -12   7 -13   12.10    2.10
  -5  12  13   10.40    3.50
  -7  -5  13    8.80    2.00
  -7  -5  13    8.00    2.60
  12  -7  13    4.40    2.10
  -3 -10  13    2.20    2.10
  -6  -7  13   -0.50    1.00
   1   0 -14    2.90    0.50
   1   0 -14    2.60    0.50
   0  -1 -14    1.80    0.50
  -1   1 -14    1.70    0.60
   0  -1 -14    2.60    0.80
  -1   1 -14    1.60    0.40
   0  -1 -14    3.10    0.70
   1   0 -14    1.90    0.60
   0   1  14    1.70    0.70
   1  -1  14    1.00    0.50
  -1   0  14    1.70    0.60
   1  -1  14    2.00    0.50
  -1   0  14    1.80    0.40
   2  -2 -14  962.40   58.49
   0   2 -14  858.61   55.49
  -2   0 -14  839.92   53.19
   2  -2 -14  953.40   55.29
   0  -2  14  782.02   53.19
   2   0  14  845.72   54.09
  -2   2  14  960.50   59.09
   2   0  14  823.72   52.79
  -2   2  14  840.62   55.19
   0  -2  14  829.92   55.39
  -2   3 -14 2427.76  130.69
  -1  -2 -14 2429.26  132.89
  -1  -2 -14 2333.27  129.89
   3  -1 -14 2687.43  132.89
  -2   3 -14 2370.56  133.09
   2  -3  14 2324.17  129.99
   2  -3  14 2099.89  131.59
   1   2  14 2368.66  130.29
  -3   1  14 2506.25  132.49
  -3   1  14 2256.57  133.49
  -3  -1 -14  143.79    8.40
  -1   4 -14  146.69    8.50
  -1   4 -14  155.88    8.50
   4  -3 -14  136.49    8.80
   4  -3 -14  155.78    8.10
  -3  -1 -14  153.08    8.80
  -3  -1 -14  146.29    8.70
  -4   3  14  161.38    9.20
  -4   3  14  146.79    8.00
   3   1  14  131.19    8.30
   1  -4  14  151.28    8.50
  -3   2 -14 2591.74  134.69
   1  -3 -14 2449.16  134.29
   1  -3 -14 2445.46  137.99
  -3   2 -14 2368.26  131.19
   2   1 -14 2492.25  131.49
  -2  -1  14 2231.88  133.79
   3  -2  14 2204.98  132.09
  -1   3  14 2376.86  137.69
  -2  -1  14 2657.93  134.89
  -1   3  14 2497.05  135.09
  -3   5 -14   30.80    2.40
  -3   5 -14   30.60    2.80
   5  -2 -14   29.60    2.90
  -2  -3 -14   37.90    3.00
  -2  -3 -14   36.70    3.10
   5  -2 -14   27.80    1.90
  -5   2  14   31.70    2.00
   2   3  14   38.30    3.00
   2   3  14   40.20    3.20
   3  -5  14   33.10    2.90
   3  -5  14   30.20    2.50
  -5   2  14   36.80    3.40
  -4  -2 -14   73.09    5.10
  -4  -2 -14   69.59    5.00
  -4  -2 -14   68.99    6.10
   6  -4 -14   66.99    4.30
  -2   6 -14   69.79    5.00
  -2   6 -14   67.89    4.80
  -6   4  14   64.89    5.40
   2  -6  14   70.59    5.00
   2  -6  14   72.99    5.00
   4   2  14   72.79    5.00
  -6   4  14   66.19    4.30
   1   3 -14  172.38    8.50
  -4   1 -14  153.88    9.00
   3  -4 -14  151.28    9.20
  -4   1 -14  147.79    8.10
   3  -4 -14  147.69    8.60
  -1  -3  14  146.09    8.90
   4  -1  14  151.78    9.00
  -3   4  14  149.69    8.50
  -3   4  14  169.38    9.60
  -1  -3  14  155.08    8.40
   4  -1  14  140.99    8.10
  -4   4 -14 1210.28   61.69
   0  -4 -14 1218.08   61.89
  -4   0  14 1146.69   61.79
   0   4  14 1243.98   61.49
  -4   7 -14  346.37   18.90
  -3  -4 -14  348.47   19.00
  -3  -4 -14  353.16   19.50
   7  -3 -14  326.07   18.80
  -4   7 -14  339.07   18.40
   7  -3 -14  359.16   17.60
   4  -7  14  359.76   18.60
  -7   3  14  288.47   19.00
   4  -7  14  344.77   19.00
  -7   3  14  346.67   17.60
   3   4  14  307.87   18.90
   3   4  14  327.87   18.70
  -5  -3 -14  321.97   18.20
   8  -5 -14  317.57   17.60
  -5  -3 -14  316.67   18.30
  -3   8 -14  328.57   18.00
  -8   5  14  300.17   17.10
  -8   5  14  328.97   19.00
   5   3  14  315.37   18.10
   3  -8  14  321.27   18.20
  -5   0 -14  343.87   17.80
   0   5 -14  320.97   17.90
  -5   0 -14  351.56   18.10
   5  -5 -14  284.37   17.90
  -5   0 -14  329.77   18.00
   0   5 -14  324.27   17.50
   5  -5 -14  306.57   17.30
  -5   5  14  327.57   17.30
   0  -5  14  305.27   17.90
   5   0  14  332.67   17.40
   0  -5  14  325.87   17.60
  -5   5  14  339.37   18.60
   2  -5 -14   35.60    3.30
  -5   3 -14   43.50    3.20
   3   2 -14   28.90    2.10
   2  -5 -14   33.30    2.90
   5  -3  14   41.80    3.20
  -3  -2  14   30.20    2.20
  -2   5  14   35.10    2.80
  -3  -2  14   33.00    3.00
  -2   5  14   31.10    3.20
  -3  -2  14   25.90    3.20
  -1  -5 -14  672.33   34.10
  -5   6 -14  660.53   33.00
  -5   6 -14  638.64   34.00
   1   5  14  601.54   34.30
  -6   1  14  669.93   32.40
  -6   1  14  648.74   32.40
   5  -6  14  632.04   33.00
   5  -6  14  667.13   34.10
  -6   1  14  567.24   34.00
  -6   1  14  642.84   34.30
   1   5  14  654.13   33.90
  -5   9 -14  232.68   14.20
   9  -4 -14  242.88   13.20
  -4  -5 -14  247.98   14.80
  -9   4  14  224.68   13.20
  -9   4  14  258.87   15.50
   5  -9  14  251.87   14.80
   4   5  14  258.27   15.70
  10  -6 -14   33.00    2.90
  -6  -4 -14   30.10    4.20
   6   4  14   32.90    4.70
 -10   6  14   35.80    5.20
   4 -10  14   28.20    4.00
 -10   6  14   31.00    2.90
  -6  -1 -14  270.97   16.30
  -1   7 -14  305.67   16.80
   7  -6 -14  311.47   16.10
  -1   7 -14  299.17   16.50
  -6  -1 -14  306.07   16.80
   6   1  14  281.87   16.30
   1  -7  14  277.57   16.80
  -7   6  14  301.67   17.50
   1  -7  14  290.87   16.50
  -7   6  14  281.87   16.00
  -6   2 -14   65.79    4.30
   2   4 -14   71.69    5.30
   4  -6 -14   72.29    5.00
  -6   2 -14   70.59    4.30
   4  -6 -14   71.69    5.60
   2   4 -14   72.29    4.60
  -2  -4  14   67.49    5.40
   6  -2  14   70.49    5.20
  -2  -4  14   77.79    4.70
  -4   6  14   79.89    5.90
  -4   6  14   66.99    4.80
   1  -6 -14  699.23   35.30
  -6   5 -14  638.84   34.70
  -6   5 -14  679.33   33.40
   1  -6 -14  646.34   34.70
   6  -5  14  647.84   34.70
  -5  -1  14  658.73   33.30
  -5  -1  14  638.44   35.00
  -1   6  14  628.44   34.40
  -5  -1  14  618.94   34.70
   6  -5  14  645.04   33.20
  -1   6  14  698.93   35.40
  -5  -1  14  672.43   33.30
  -2  -6 -14  331.07   19.60
  -6   8 -14  361.06   18.80
  -8   2  14  335.17   17.90
  -8   2  14  362.56   17.80
   6  -8  14  336.37   19.50
   6  -8  14  336.77   18.70
   2   6  14  327.37   19.90
  11  -5 -14   18.50    2.40
  -5  -6 -14   17.40    3.40
  -6  11 -14   18.90    3.30
 -11   5  14   19.40    2.50
   5   6  14   16.60    3.50
 -11   5  14   20.30    4.10
   6 -11  14   14.30    3.10
  -7  -5 -14   31.40    4.80
  12  -7 -14   41.20    3.60
  -5  12 -14   46.50    5.70
 -12   7  14   32.20    5.40
   5 -12  14   38.00    5.30
   7   5  14   41.70    7.30
  -7  -2 -14    0.90    1.10
   9  -7 -14    0.10    0.60
  -2   9 -14    1.60    1.30
   2  -9  14    0.60    1.00
   7   2  14   -0.50    0.80
  -9   7  14   -1.40    1.00
  -9   7  14    0.90    1.00
   6  -7 -14  290.17   16.90
  -7   1 -14  294.47   17.30
   1   6 -14  287.07   16.70
   1   6 -14  305.77   17.50
  -7   1 -14  322.67   16.70
  -1  -6  14  318.47   17.90
  -1  -6  14  291.17   16.80
  -6   7  14  346.77   18.40
  -6   7  14  286.07   17.10
   3  -7 -14  316.07   19.60
  -7   4 -14  341.57   17.80
   3  -7 -14  361.16   19.30
  -7   4 -14  344.47   17.90
   4   3 -14  346.67   18.10
  -7   4 -14  336.87   19.20
   7  -4  14  357.46   19.30
  -4  -3  14  376.66   19.50
  -3   7  14  329.97   18.90
  -3   7  14  345.57   19.90
  -4  -3  14  350.36   18.20
  -4  -3  14  323.37   19.40
  -7   7 -14  673.83   36.20
   0  -7 -14  841.22   41.60
  -7   0  14  738.43   38.70
   7  -7  14  636.94   36.00
  -7   0  14  688.13   35.70
  -7   0  14  720.33   35.70
   7  -7  14  744.43   40.40
   0   7  14  671.53   38.00
  -3  -7 -14   -0.60    1.10
  -7  10 -14    0.00    0.80
   7 -10  14   -0.80    1.00
 -10   3  14    0.80    0.60
 -10   3  14   -0.10    1.50
   3   7  14    0.10    1.40
 -10   3  14    0.40    0.60
   7 -10  14    1.40    1.20
  -7  13 -14   19.10    3.70
  -8  -3 -14    9.60    2.70
  -3  11 -14    9.50    2.70
  11  -8 -14   13.70    2.40
   8   3  14   13.70    3.10
 -11   8  14   16.10    3.70
   3 -11  14   12.90    2.90
   8  -8 -14   18.10    2.70
   0   8 -14   20.20    3.40
  -8   0 -14   18.70    3.10
  -8   0 -14   22.10    2.90
  -8   0 -14   21.10    3.50
   0  -8  14   18.80    3.00
  -8   8  14   12.70    3.10
   3   5 -14  339.07   18.80
  -8   3 -14  313.27   17.40
  -8   3 -14  301.17   17.20
   5  -8 -14  312.57   18.10
   3   5 -14  316.27   17.40
  -3  -5  14  324.47   17.60
  -5   8  14  353.06   19.60
   8  -3  14  331.17   18.40
   2  -8 -14  345.97   20.70
  -8   6 -14  332.77   18.10
  -8   6 -14  333.17   18.20
  -6  -2  14  355.76   20.00
   8  -6  14  314.47   20.20
  -6  -2  14  351.06   18.80
  -2   8  14  375.56   20.60
  -6  -2  14  360.16   18.30
  -1  -8 -14   81.49    6.80
  -8   9 -14   90.69    5.90
  -9   1  14   83.69    7.20
   8  -9  14  100.09    7.00
   8  -9  14   90.59    5.70
  -9   1  14   79.79    5.00
  -9   1  14   75.89    5.40
   1   8  14   80.59    7.20
  -8  12 -14    8.30    2.40
  -4  -8 -14    4.40    2.10
   4   8  14    6.90    2.60
 -12   4  14    4.40    2.40
  13  -9 -14   20.70    3.30
  -9  -1 -14   79.89    6.40
  10  -9 -14   92.59    6.50
  -1  10 -14   94.89    7.40
  -9  -1 -14   87.49    6.90
 -10   9  14   70.39    7.30
   1 -10  14   84.49    6.90
  -9   2 -14   -0.10    1.00
   7  -9 -14    0.80    1.20
  -9   2 -14    1.10    0.90
   2   7 -14   -0.30    1.10
  -9   2 -14    1.90    1.00
  -7   9  14    0.80    1.30
  -2  -7  14    0.30    0.90
   5   4 -14  251.87   13.70
  -9   5 -14  243.18   13.50
  -9   5 -14  231.48   13.40
   4  -9 -14  238.68   14.80
  -5  -4  14  275.47   15.20
  -5  -4  14  256.07   13.80
  -4   9  14  239.88   15.60
   9  -5  14  239.48   14.70
  -9   8 -14   82.29    5.30
   1  -9 -14   84.69    6.80
  -8  -1  14   88.79    7.00
  -8  -1  14   75.39    4.90
   9  -8  14   84.49    6.60
  -8  -1  14   77.59    4.90
   9  -8  14   79.59    5.00
  -1   9  14   83.69    7.30
  -2  -9 -14   31.20    4.80
  -9  11 -14   36.80    3.70
   2   9  14   45.10    6.10
   9 -11  14   34.10    4.80
 -11   2  14   39.90    5.90
  -2  12 -14   57.29    9.60
 -10  -2 -14   55.39    6.80
  12 -10 -14   61.19    5.40
 -10   1 -14   81.79    6.40
   9 -10 -14   87.89    6.80
   1   9 -14   78.49    7.20
 -10   1 -14   87.49    7.00
  -1  -9  14   87.09    6.80
  -9  10  14   95.59    8.10
   4   6 -14   24.90    3.20
   4   6 -14   31.20    4.50
 -10   4 -14   30.50    2.80
   6 -10 -14   32.30    4.40
 -10   4 -14   28.70    2.90
  -6  10  14   28.10    4.70
  10  -4  14   30.40    4.30
  -4  -6  14   36.10    3.90
   3 -10 -14   -0.80    1.00
 -10   7 -14    0.60    0.70
 -10   7 -14   -0.60    0.50
  -7  -3  14    1.00    1.60
  -3  10  14    2.10    2.10
  -7  -3  14   -0.10    0.50
  10  -7  14    1.30    1.30
  -7  -3  14   -0.40    0.60
 -10  10 -14   82.99    5.90
   0 -10 -14   85.79    7.40
  10 -10  14   75.89    7.00
   0  10  14   85.19    7.90
 -10   0  14   90.29    7.80
 -11   0 -14   56.39    6.40
  11 -11 -14   44.90    5.50
 -11   0 -14   65.39    5.60
 -11  11  14   45.80    8.00
   0 -11  14   61.29    6.70
   3   8 -14    8.50    3.20
 -11   3 -14   11.50    2.40
 -11   3 -14   12.00    2.90
   8 -11 -14    7.90    2.30
  -3  -8  14   12.70    2.60
  -8  11  14    8.40    3.00
 -11   6 -14   17.90    2.30
   5 -11 -14   12.20    2.80
 -11   6 -14   12.30    1.90
  -5  11  14   12.30    3.30
  11  -6  14   20.30    3.50
  -6  -5  14   14.80    2.40
  -6  -5  14   19.40    3.50
  -6  -5  14   15.00    2.50
   2 -11 -14   23.10    4.20
 -11   9 -14   40.00    3.30
  -2  11  14   36.80    5.70
  -9  -2  14   40.70    5.60
  -9  -2  14   39.30    3.20
  11  -9  14   43.40    5.50
 -12   2 -14   53.19    5.00
  10 -12 -14   46.80    5.80
 -12   2 -14   54.19    6.80
  -2 -10  14   42.80    5.60
   7 -12 -14   49.70    5.80
 -12   5 -14   36.40    3.50
  -7  12  14   36.20    5.90
  -5  -7  14   39.00    5.40
  -5  -7  14   46.10    4.90
  12  -5  14   26.90    4.40
  12  -8  14    6.20    2.30
  -8  -4  14    5.50    1.50
  -4  -9  14   18.70    3.50
  -7  -6  14   22.40    3.90
   0   0 -15    0.40    0.40
   0   0 -15    0.70    0.40
   0   0  15    0.30    0.50
   0   0  15    0.50    0.40
   2  -1 -15   28.20    1.70
   2  -1 -15   26.70    2.40
   2  -1 -15   28.60    1.80
  -1   2 -15   26.90    2.20
  -1  -1 -15   24.40    2.20
  -1  -1 -15   30.30    2.30
  -1  -1 -15   32.30    2.40
  -2   1  15   28.30    2.50
   1  -2  15   26.80    1.90
   1   1  15   32.50    2.30
   1  -2  15   28.20    2.00
   1  -2  15   26.60    2.20
   1  -2 -15   30.40    2.10
   1   1 -15   28.80    1.80
  -2   1 -15   32.80    2.40
   1   1 -15   26.20    2.20
  -2   1 -15   29.90    1.70
  -1  -1  15   31.70    2.40
   2  -1  15   28.30    1.70
  -1   2  15   27.00    2.10
  -1   2  15   25.60    2.50
   2  -1  15   28.40    2.30
  -1  -1  15   25.20    2.20
  -1  -1  15   25.10    1.80
   4  -2 -15   34.20    2.90
  -2   4 -15   31.40    2.70
  -2  -2 -15   38.00    2.90
  -2   4 -15   32.70    2.40
  -2  -2 -15   31.70    2.80
   4  -2 -15   32.40    1.90
  -2  -2 -15   29.90    2.70
  -4   2  15   32.70    1.90
   2   2  15   28.20    2.70
  -4   2  15   32.00    3.10
   2  -4  15   33.40    3.00
   2  -4  15   31.70    2.50
  -3   0 -15    0.80    0.70
   3  -3 -15    0.90    0.50
   0   3 -15    1.30    0.60
   3  -3 -15   -0.20    0.70
  -3   0 -15    0.00    0.40
   0   3 -15    0.80    0.70
  -3   0 -15   -0.20    0.50
   0  -3  15    2.20    0.90
   0  -3  15    1.10    0.60
  -3   3  15    0.40    0.80
  -3   3  15    0.30    0.40
   3   0  15    0.50    0.50
   3   0  15   -0.50    0.50
   3   0 -15    0.10    0.60
   0  -3 -15    1.60    0.80
   0  -3 -15    3.40    1.20
  -3   3 -15    2.10    0.80
   3  -3  15    2.20    0.80
  -3   0  15    1.10    0.80
   0   3  15    1.30    0.70
   0   3  15    2.90    1.10
  -3  -3 -15    2.90    1.20
  -3   6 -15    1.50    0.90
   6  -3 -15    3.30    0.60
  -3  -3 -15    4.70    1.40
   6  -3 -15    4.20    1.40
  -3   6 -15    3.70    1.10
  -3  -3 -15    3.80    1.30
   3  -6  15    3.40    1.10
  -6   3  15    1.90    0.60
   3  -6  15    2.70    1.10
   3   3  15    1.70    1.10
  -6   3  15    6.70    2.00
  -4  -1 -15  421.26   22.20
   5  -4 -15  425.36   21.30
  -4  -1 -15  422.56   22.20
  -1   5 -15  399.46   21.80
  -1   5 -15  420.66   21.90
   5  -4 -15  401.06   22.30
  -4  -1 -15  380.06   21.60
   4   1  15  390.36   21.60
  -5   4  15  433.86   22.70
   1  -5  15  414.96   21.90
  -5   4  15  406.66   21.30
   1  -5  15  399.16   22.00
   2  -4 -15   29.30    2.60
   2  -4 -15   35.00    3.10
   2   2 -15   32.50    2.10
  -4   2 -15   28.10    2.70
  -2   4  15   25.50    3.20
   4  -2  15   30.70    2.80
  -2  -2  15   35.40    3.00
  -2   4  15   29.80    2.50
  -2  -2  15   34.90    2.20
  -2  -2  15   37.50    2.90
  -4   5 -15  198.58   10.60
  -4   5 -15  184.58   11.40
   5  -1 -15  185.68   11.40
  -1  -4 -15  190.58   11.50
  -1  -4 -15  196.98   11.70
   1   4  15  213.08   11.90
  -5   1  15  223.48   12.00
   4  -5  15  201.38   10.70
   4  -5  15  199.98   11.50
   1   4  15  190.48   11.30
  -4   8 -15   88.19    6.10
  -4  -4 -15   94.79    7.10
  -4  -4 -15   77.39    6.40
   8  -4 -15   84.69    5.20
  -8   4  15   93.69    7.20
   4   4  15   83.19    6.50
   4  -8  15   84.39    6.10
   4  -8  15   87.99    6.40
  -5  -2 -15  105.19    7.20
  -2   7 -15  107.39    7.20
   7  -5 -15  119.79    6.60
  -5  -2 -15  106.89    7.30
  -2   7 -15  106.79    7.20
  -7   5  15  120.49    8.20
   5   2  15  110.49    7.20
   2  -7  15   99.29    7.10
   2  -7  15   89.29    7.00
  -7   5  15  107.59    6.50
  -5   1 -15  414.56   21.80
   4  -5 -15  410.86   22.90
   4  -5 -15  421.46   22.80
  -5   1 -15  430.06   22.70
   1   4 -15  413.76   22.00
   1   4 -15  443.26   22.80
  -5   1 -15  436.26   21.70
  -1  -4  15  343.37   22.50
  -4   5  15  429.96   22.20
  -1  -4  15  434.76   22.10
   5  -1  15  432.56   22.70
  -4   5  15  432.86   23.30
  -5   4 -15  194.28   11.30
   1  -5 -15  182.08   11.50
   1  -5 -15  195.68   11.20
  -1   5  15  208.18   11.80
   5  -4  15  183.28   11.20
  -4  -1  15  210.08   11.50
  -1   5  15  193.68   11.00
  -4  -1  15  189.28   11.50
  -4  -1  15  191.98    9.90
  -4  -1  15  186.68    9.90
  -5   7 -15    9.50    1.70
  -2  -5 -15    3.80    1.40
  -2  -5 -15   10.50    2.40
  -7   2  15    9.20    1.00
  -7   2  15    5.10    1.90
   2   5  15    7.60    2.20
  -7   2  15    8.60    1.00
   5  -7  15   10.20    2.20
   5  -7  15   10.20    1.80
  -5  -5 -15    1.30    1.30
  10  -5 -15    6.20    1.30
  -5  10 -15    5.20    1.80
   5 -10  15    3.70    1.80
 -10   5  15    2.80    1.00
 -10   5  15    4.10    2.10
   5   5  15    5.70    2.00
   9  -6 -15   14.60    2.10
  -6  -3 -15   19.80    3.30
  -3   9 -15   15.10    2.70
  -9   6  15   13.60    2.10
   6   3  15   15.70    3.00
   3  -9  15   11.30    2.50
  -9   6  15    9.90    3.00
  -6   0 -15   -0.30    0.60
   6  -6 -15    0.20    0.80
   0   6 -15    0.60    1.00
   0   6 -15    1.50    1.00
   6  -6 -15   -1.00    0.70
  -6   0 -15   -0.30    0.90
  -6   0 -15    0.30    1.10
  -6   6  15    0.40    0.70
   0  -6  15    1.10    0.90
   0  -6  15    0.60    1.10
  -6   6  15   -0.10    1.20
   3   3 -15    4.10    0.80
  -6   3 -15    2.40    1.00
  -6   3 -15    2.20    0.50
   3  -6 -15    1.80    0.90
  -6   3 -15    2.50    0.50
   3  -6 -15    4.60    1.60
  -3  -3  15    5.80    1.40
  -3   6  15    1.70    1.20
  -3   6  15    0.90    0.70
   6  -3  15    4.20    1.30
  -3  -3  15    2.60    0.70
  -6   6 -15   -0.10    0.70
  -6   6 -15    0.40    0.40
   0  -6 -15   -0.30    0.70
   0  -6 -15    0.90    1.00
   6  -6  15    1.00    0.50
  -6   0  15   -0.10    1.00
  -6   0  15    0.40    0.80
  -6   0  15    0.50    0.30
   6  -6  15    0.10    0.70
   0   6  15    1.00    1.20
   0   6  15   -0.30    0.60
  -6   0  15    0.20    0.20
  -3  -6 -15   -0.70    0.90
  -6   9 -15    1.20    1.00
   6  -9  15    0.10    0.80
  -9   3  15   -0.70    1.50
   3   6  15    0.00    1.20
  -9   3  15    0.80    0.50
   6  -9  15    1.10    1.10
  -9   3  15    0.20    0.40
  -6  -6 -15    2.40    1.90
  12  -6 -15    5.40    1.40
  -6  12 -15    7.30    2.20
 -12   6  15    6.10    2.60
   6 -12  15    4.20    2.00
   6   6  15    6.70    2.40
  11  -7 -15   60.99    4.40
  -4  11 -15   55.69    5.20
  -7  -4 -15   40.00    5.30
 -11   7  15   51.59    4.30
   7   4  15   44.50    5.80
 -11   7  15   60.19    7.10
   4 -11  15   54.39    6.30
  -1   8 -15   18.90    3.20
  -7  -1 -15   18.50    3.10
  -7  -1 -15   18.70    3.00
   8  -7 -15   14.60    2.20
  -8   7  15   18.40    3.60
   1  -8  15   18.70    2.90
   7   1  15   12.80    2.40
   2   5 -15  108.59    6.60
   2   5 -15  106.79    7.60
  -7   2 -15   96.99    6.40
   5  -7 -15  107.79    7.10
  -7   2 -15  139.89   10.10
  -7   2 -15  109.09    6.40
  -5   7  15  110.89    8.10
  -2  -5  15  114.39    6.80
  -2  -5  15  104.89    7.60
   7  -2  15  104.09    7.30
  -7   5 -15    9.30    1.00
   2  -7 -15    6.90    1.70
  -7   5 -15    9.00    1.10
  -2   7  15    9.50    1.90
  -5  -2  15    9.00    1.30
   7  -5  15    9.00    2.10
  -5  -2  15    7.40    1.90
  -2   7  15    8.80    2.40
  -5  -2  15    9.10    1.30
  -7   8 -15  125.99    7.60
  -1  -7 -15  134.79    9.00
   1   7  15  139.59    9.40
   7  -8  15  128.59    8.70
  -8   1  15  121.19    6.90
  -8   1  15  120.99    6.90
  -8   1  15  140.09    9.40
   7  -8  15  122.79    7.50
  -7  11 -15    7.30    2.00
  -4  -7 -15    5.70    2.40
 -11   4  15   10.40    3.30
   4   7  15    7.20    2.50
 -11   4  15    7.00    1.30
  -7  14 -15    2.80    2.90
  -5  13 -15    5.00    2.30
  -8  -2 -15    9.70    2.50
  -8  -2 -15    6.90    1.90
  -2  10 -15    9.20    2.50
  10  -8 -15    7.40    1.90
   2 -10  15    9.70    2.50
   8   2  15    7.00    2.20
 -10   8  15    5.30    2.40
   7  -8 -15   16.40    2.60
   1   7 -15   13.50    3.00
   1   7 -15   18.60    2.70
  -8   1 -15   20.60    2.80
  -8   1 -15   15.80    2.80
  -8   1 -15   15.70    2.30
  -7   8  15   20.10    2.90
  -7   8  15   20.60    3.80
  -1  -7  15   15.70    2.60
   4   4 -15   78.09    5.40
  -8   4 -15   93.29    5.30
   4  -8 -15   90.29    6.50
  -8   4 -15   91.39    5.30
   8  -4  15   91.69    6.60
  -4  -4  15   75.39    6.90
  -4  -4  15   91.59    5.70
  -8   7 -15  129.79    7.20
   1  -8 -15  123.89    8.70
  -7  -1  15  120.69    8.80
  -1   8  15  132.19    9.40
  -7  -1  15  121.99    6.90
   8  -7  15  125.39    6.90
   8  -7  15  120.59    8.50
  -7  -1  15  118.29    6.90
  -8  10 -15    9.30    2.00
  -2  -8 -15   14.40    3.20
 -10   2  15   12.20    1.50
   2   8  15    7.90    2.70
 -10   2  15    7.90    2.50
   8 -10  15    6.30    2.20
   8 -10  15    6.40    1.80
 -10   2  15    8.60    1.30
  -8  13 -15    4.40    1.90
  -9  -3 -15    0.10    1.40
  12  -9 -15   -0.50    0.90
  -3  12 -15   -0.20    1.20
  -9  -3 -15    0.40    1.30
 -12   9  15    3.10    2.30
  -9   0 -15   -0.30    0.90
  -9   0 -15   -0.10    0.90
   0   9 -15    0.00    1.20
   9  -9 -15   -0.80    0.90
   0  -9  15   -0.40    1.00
  -9   9  15    1.30    1.40
   6  -9 -15   11.80    2.40
  -9   3 -15   13.10    1.90
   3   6 -15   13.50    3.00
   3   6 -15   11.10    1.90
  -3  -6  15   10.20    2.00
  -6   9  15    9.70    2.80
   9  -3  15   11.40    2.50
   3  -9 -15    0.00    0.90
  -9   6 -15    0.40    0.60
  -9   6 -15    0.50    0.50
   9  -6  15   -0.70    0.80
  -6  -3  15   -0.70    0.40
  -6  -3  15    0.00    1.30
  -6  -3  15    0.10    0.80
  -3   9  15    0.40    1.30
   0  -9 -15   -1.30    0.90
  -9   9 -15    0.40    0.70
  -9   0  15    0.60    0.50
   9  -9  15    0.80    0.70
  -9   0  15    0.00    0.40
  -9   0  15   -0.50    1.40
   0   9  15    0.90    1.50
   9  -9  15    1.00    1.20
  -9  12 -15    0.00    1.10
  -1  11 -15    1.80    1.90
 -10  -1 -15    4.60    2.10
  11 -10 -15    3.60    1.80
 -10  -1 -15    3.50    1.70
   1 -11  15    3.30    1.90
 -11  10  15    5.90    2.40
 -10   2 -15   10.20    2.10
   8 -10 -15   10.10    2.50
 -10   2 -15    6.70    2.00
 -10   2 -15    8.90    2.40
   2   8 -15    9.40    2.50
  -2  -8  15   10.20    2.40
  -8  10  15    7.50    2.60
 -10   5 -15    3.40    1.00
   5 -10 -15    6.60    2.00
 -10   5 -15    3.10    0.90
  -5  -5  15    6.90    2.30
  10  -5  15    9.20    2.30
  -5  -5  15    3.00    1.30
  -5  10  15    2.30    1.70
 -10   8 -15   11.00    1.60
 -10   8 -15   10.50    1.80
   2 -10 -15    1.30    1.60
  -8  -2  15    7.50    1.30
  -8  -2  15    9.20    2.60
  -2  10  15   10.80    3.10
  10  -8  15    5.40    2.00
 -10  11 -15    1.70    1.10
 -11   1  15    0.50    1.80
  10 -11 -15    1.60    1.60
   1  10 -15    3.30    2.00
 -11   1 -15    5.70    2.10
 -11   1 -15    1.30    1.40
  -1 -10  15    1.10    1.60
 -10  11  15    3.60    2.40
   7 -11 -15   56.59    6.10
 -11   4 -15   60.99    4.60
  -4  -7  15   57.79    4.90
  11  -4  15   50.09    5.80
  -7  11  15   57.59    7.50
   4 -11 -15    9.30    2.80
 -11   7 -15    8.90    1.50
  -7  -4  15    7.90    1.70
  -7  -4  15    5.20    3.80
  11  -7  15    8.30    2.30
  -7  -4  15    7.90    2.30
  11 -10  15    1.80    2.20
 -10  -1  15    0.60    3.10
 -12   3 -15    0.80    1.40
 -12   3 -15   -0.10    1.10
   9 -12 -15   -0.80    1.10
  -3  -9  15    1.10    1.40
   6 -12 -15    7.00    2.30
  -6  -6  15    2.10    2.00
  -6  -6  15    7.00    2.10
  -6  12  15    5.80    2.70
  12  -6  15    0.10    1.30
  -5  -8  15    5.40    2.00
   0   1 -16  725.23   36.80
   1  -1 -16  756.62   36.70
  -1   0 -16  717.63   37.00
  -1   1  16  691.53   37.20
  -2  -1 -16 1046.40   53.49
   0  -2 -16 3558.04  206.58
   0  -2 -16 3825.92  204.58
   2   0 -16 3896.51  204.08
   2   0 -16 4069.99  206.28
  -2   2 -16 3860.71  203.58
  -2   2 -16 4192.08  207.18
   2  -2  16 3722.73  203.68
   0   2  16 3496.75  206.28
  -2   0  16 3761.32  205.98
   0   2  16 3692.43  204.88
  -2   0  16 3909.11  206.98
   2  -2  16 4063.59  206.18
  -2   5 -16  180.68    9.80
   5  -3 -16  171.18   10.30
  -3  -2 -16  173.48   10.20
  -2   5 -16  167.28   10.00
  -3  -2 -16  176.48   10.20
   5  -3 -16  164.18    9.10
  -3  -2 -16  185.28   10.10
   3   2  16  183.58   10.10
  -5   3  16  170.18    9.10
  -5   3  16  163.98   10.50
   2  -5  16  159.58    9.70
   2  -5  16  166.38   10.00
  -3   1 -16  998.60   51.59
  -2   3  16 1016.50   51.09
  -1  -3 -16  821.02   47.20
  -3   4 -16  917.71   47.20
  -1  -3 -16  904.11   47.20
   4  -1 -16  936.61   47.30
   1   3  16  867.21   47.10
   3  -4  16  928.41   47.20
   3  -4  16  925.61   46.40
   1   3  16 1048.20   48.20
   7  -4 -16  481.05   24.70
  -4  -3 -16  439.56   25.80
  -3   7 -16  477.45   25.80
  -4  -3 -16  461.55   25.90
  -3   7 -16  485.35   25.50
  -7   4  16  466.05   26.50
   3  -7  16  449.06   25.50
   3  -7  16  515.55   26.00
   4   3  16  525.55   26.10
  -7   4  16  475.55   24.70
   4  -4 -16  870.61   41.30
  -4   0 -16  763.32   40.20
   0   4 -16  787.12   40.30
  -4   0 -16  798.42   40.90
   4  -4 -16  791.42   40.20
  -4   0 -16  770.52   40.80
   0  -4  16  759.42   40.70
   0  -4  16  804.12   40.40
   4   0  16  794.42   40.10
  -4   4  16  721.43   41.20
   1  -4 -16  860.71   47.00
  -4   3 -16  930.61   46.90
   1  -4 -16  934.81   46.70
  -1   4  16  882.11   46.50
  -3  -1  16  927.01   47.10
   4  -3  16  914.81   46.80
  -4   6 -16   16.60    2.50
  -4   6 -16   16.50    1.70
  -2  -4 -16   17.80    2.60
  -2  -4 -16   19.50    2.90
   6  -2 -16   14.60    2.40
  -6   2  16   16.10    1.00
   2   4  16   14.30    2.40
  -6   2  16   14.80    1.00
   4  -6  16   20.20    2.20
   4  -6  16   15.90    2.60
   2   4  16   15.10    2.40
  -6   2  16   19.80    3.00
  -4   9 -16  268.17   15.70
  -5  -4 -16  277.67   16.20
   4  -9  16  298.27   16.10
   4  -9  16  274.17   16.10
  -9   5  16  247.68   16.60
  -9   5  16  268.37   14.70
   5   4  16  256.07   16.00
  -5  -1 -16 1486.45   74.99
  -5  -1 -16 1480.75   74.49
  -1   6 -16 1529.75   74.59
  -5  -1 -16 1427.66   74.89
   6  -5 -16 1462.45   75.09
   1  -6  16 1415.96   74.79
  -6   5  16 1471.55   73.99
   1  -6  16 1484.25   74.59
  -6   5  16 1303.17   75.29
   5   1  16 1530.45   74.39
   2   3 -16  172.88    9.40
  -5   2 -16  182.18    8.90
  -5   2 -16  170.18    8.90
   3  -5 -16  185.18   10.70
  -5   2 -16  181.18   10.40
   3  -5 -16  169.38   10.00
  -2  -3  16  161.18   10.10
  -3   5  16  167.48    9.80
  -2  -3  16  158.08   10.20
  -2  -3  16  168.38    9.40
   5  -2  16  179.78   10.30
  -3   5  16  176.68   10.80
  -5   5 -16   30.90    2.00
  -5   5 -16   31.20    4.00
   0  -5 -16   35.90    3.20
   0  -5 -16   28.30    3.60
  -5   0  16   31.70    3.20
   5  -5  16   29.00    1.90
   5  -5  16   34.40    3.80
   0   5  16   39.30    3.60
  -5   0  16   32.90    3.90
  -3  -5 -16  346.77   19.60
  -5   8 -16  326.87   18.60
  -8   3  16  353.36   17.80
   5  -8  16  342.97   20.30
   3   5  16  321.77   19.60
  -8   3  16  338.47   17.70
   5  -8  16  360.56   18.90
  11  -6 -16  110.59    6.90
  -6  -5 -16  109.89    8.50
  -5  11 -16  116.79    8.20
 -11   6  16   94.69    7.60
   5 -11  16   97.69    8.20
   6   5  16  120.99    8.70
 -11   6  16  116.59    9.30
  -2   8 -16  243.68   13.60
   8  -6 -16  230.58   12.70
  -6  -2 -16  219.98   13.60
  -6  -2 -16  220.08   13.40
  -8   6  16  227.58   12.70
   6   2  16  209.78   13.20
  -8   6  16  230.38   14.50
   2  -8  16  228.88   13.50
   2  -8  16  220.68   13.70
   5  -6 -16 1499.85   75.79
   1   5 -16 1487.15   75.59
   5  -6 -16 1330.17   76.39
   1   5 -16 1489.45   76.39
  -6   1 -16 1437.16   76.29
  -6   1 -16 1531.45   75.39
  -5   6  16 1699.33   77.29
  -5   6  16 1438.96   75.69
  -1  -5  16 1481.55   75.69
   2  -6 -16   17.90    3.00
   2  -6 -16   14.20    2.30
  -6   4 -16   14.40    2.50
   6  -4  16   16.30    2.40
  -2   6  16   13.50    2.60
  -4  -2  16   14.10    2.50
  -4  -2  16   14.00    1.50
  -2   6  16   22.20    3.90
  -4  -2  16   21.00    3.00
  -1  -6 -16  309.47   17.10
  -6   7 -16  284.27   15.70
  -7   1  16  299.57   17.40
   1   6  16  310.17   17.50
   6  -7  16  274.97   15.60
   6  -7  16  296.17   16.90
  -6  10 -16   48.60    4.40
  -4  -6 -16   62.29    5.50
   4   6  16   50.59    5.30
 -10   4  16   58.69    5.90
   6 -10  16   64.69    6.50
   6 -10  16   57.19    4.70
 -10   4  16   52.09    3.50
 -10   4  16   47.50    3.50
  -6  13 -16   64.39    8.00
  -7  -3 -16   20.20    3.50
  -3  10 -16   31.20    4.30
  10  -7 -16   28.80    3.30
 -10   7  16   24.20    3.10
   7   3  16   26.80    4.00
   3 -10  16   29.80    4.30
 -10   7  16   34.40    5.30
  -7   0 -16  412.36   21.90
   7  -7 -16  398.46   21.80
  -7   0 -16  423.76   21.60
   0   7 -16  409.66   22.50
   0   7 -16  373.26   21.80
  -7   7  16  382.76   21.70
   0  -7  16  405.36   22.10
   3   4 -16  471.95   25.40
  -7   3 -16  514.35   25.10
   4  -7 -16  491.15   26.40
  -7   3 -16  502.65   25.10
  -4   7  16  471.35   26.10
  -3  -4  16  464.15   26.90
  -3  -4  16  515.85   26.60
  -3  -4  16  494.35   25.60
  -4   7  16  468.55   27.20
   7  -3  16  480.35   26.50
   1  -7 -16  276.67   16.70
  -7   6 -16  296.97   15.10
  -1   7  16  272.07   17.20
  -6  -1  16  303.57   15.00
   7  -6  16  292.67   16.70
   7  -6  16  279.07   14.90
  -6  -1  16  293.27   15.00
  -6  -1  16  295.07   17.00
  -7   9 -16   64.39    4.70
  -2  -7 -16   63.39    5.70
  -9   2  16   61.69    3.70
  -9   2  16   56.39    5.90
  -9   2  16   58.89    3.70
   7  -9  16   59.69    4.60
   2   7  16   74.99    6.30
   7  -9  16   72.19    5.80
  -7  12 -16   43.80    4.50
  -5  -7 -16   39.80    5.40
   5   7  16   46.10    6.20
 -12   5  16   47.40    6.80
  -4  12 -16   48.10    5.80
  -8  -4 -16   39.80    5.30
  12  -8 -16   43.80    4.60
   4 -12  16   34.10    5.60
   8   4  16   43.50    5.50
 -12   8  16   34.80    5.70
  -1   9 -16   84.89    6.70
  -8  -1 -16   77.69    5.90
  -8  -1 -16   80.99    6.40
   9  -8 -16   79.99    5.80
  -9   8  16   79.19    7.20
   1  -9  16   78.59    6.30
   6  -8 -16  250.97   14.00
  -8   2 -16  208.98   13.10
  -8   2 -16  255.97   13.20
   2   6 -16  229.28   13.40
   2   6 -16  247.98   17.80
  -2  -6  16  234.58   13.60
  -6   8  16  239.88   15.10
   8  -2  16  241.18   14.30
  -8   5 -16  322.57   17.30
  -8   5 -16  333.87   17.40
   3  -8 -16  343.57   19.30
  -5  -3  16  326.87   19.30
  -3   8  16  361.26   20.20
   8  -5  16  349.47   19.70
  -5  -3  16  336.67   17.90
  -5  -3  16  342.57   17.90
  -8   8 -16  149.29    8.50
   0  -8 -16  150.78   10.10
  -8   0  16  140.79    7.80
   0   8  16  150.18   10.60
  -8   0  16  155.78   10.50
  -8   0  16  142.79    7.80
   8  -8  16  150.38    9.90
  -3  -8 -16   37.70    5.10
  -8  11 -16   36.10    4.20
 -11   3  16   32.90    2.40
   8 -11  16   35.70    4.90
  -2  11 -16   57.29    5.60
  -9  -2 -16   50.69    4.90
  11  -9 -16   50.59    4.60
  -9  -2 -16   46.20    5.70
 -11   9  16   54.39    7.20
   2 -11  16   54.09    9.00
  -9   1 -16   91.79    6.20
  -9   1 -16   83.19    6.60
  -9   1 -16   81.79    5.80
   1   8 -16   74.59    6.60
   8  -9 -16   76.59    6.50
  -8   9  16   72.19    7.10
  -1  -8  16   84.19    6.30
  -9   4 -16  275.67   14.40
  -9   4 -16  255.27   14.30
   5  -9 -16  289.87   16.00
   4   5 -16  271.47   14.80
  -4  -5  16  270.57   14.90
  -4  -5  16  242.88   15.80
  -5   9  16  267.37   16.80
   9  -4  16  261.37   15.90
   2  -9 -16   55.59    5.40
  -9   7 -16   60.29    3.80
  -9   7 -16   66.89    4.00
  -2   9  16   65.89    6.30
   9  -7  16   57.89    5.30
  -7  -2  16   60.09    4.00
  -7  -2  16   67.89    5.90
  -9  10 -16   26.10    2.70
   1   9  16   29.50    5.10
 -10   1  16   21.40    4.10
 -10   1  16   23.20    1.80
   9 -10  16   28.10    2.60
   0  10 -16  199.08   16.60
  10 -10 -16  200.08   12.50
 -10   0 -16  197.18   12.30
 -10  10  16  186.68   15.00
   0 -10  16  205.88   13.00
 -10   3 -16   26.50    2.80
   3   7 -16   39.70    5.20
   7 -10 -16   22.70    3.60
 -10   3 -16   31.10    2.90
  -7  10  16   34.80    5.50
  -3  -7  16   28.30    3.60
  10  -3  16   22.40    3.80
   4 -10 -16   53.89    6.00
 -10   6 -16   49.80    3.40
 -10   6 -16   52.49    3.50
  -6  -4  16   51.29    3.90
  -4  10  16   65.39    6.20
  -6  -4  16   50.59    3.90
  10  -6  16   54.59    5.10
  -6  -4  16   52.69    5.30
 -10   9 -16   27.50    2.40
  -9  -1  16   30.40    6.40
  10  -9  16   21.50    4.30
  10  -9  16   26.50    2.20
  -9  -1  16   26.30    2.10
 -11  -1 -16    1.80    2.00
  12 -11 -16    1.30    1.80
   9 -11 -16   47.00    5.40
   2   9 -16   47.40    6.20
 -11   2 -16   41.80    4.30
 -11   2 -16   52.99    6.10
  -2  -9  16   57.19    5.10
  -9  11  16   56.99    7.40
   6 -11 -16  115.49    8.50
  -5  -6  16  104.19    7.30
  11  -5  16  116.09    8.50
  -6  11  16  101.99    9.90
   3 -11 -16   25.10    4.30
 -11   8 -16   30.10    2.50
  -8  -3  16   35.90    2.90
  -8  -3  16   34.10    5.10
  11  -8  16   42.90    5.20
  -3  11  16   40.80    6.00
  11 -12 -16    3.80    2.20
   8 -12 -16   41.30    5.40
 -12   4 -16   42.20    5.70
  -4  -8  16   48.60    5.30
   5 -12 -16   41.40    5.60
  -7  -5  16   45.70    3.90
  12  -7  16   41.00    5.60
  -3 -10  16    2.20    1.90
  -6  -7  16   84.79    9.70
  -1   1 -17    2.80    0.50
   1   0 -17    0.20    0.30
   0  -1 -17    1.80    0.60
   1   0 -17    0.40    0.50
   0  -1 -17    1.30    0.60
  -1   1 -17    2.00    0.60
   1  -1  17    1.60    0.60
   0   1  17    2.10    0.70
   1  -1  17    2.10    0.60
  -2   0 -17    1.00    0.60
   2  -2 -17   -0.90    0.50
  -2   0 -17    0.20    0.50
   0   2 -17   -0.60    0.30
   2  -2 -17    0.30    0.30
   0  -2  17   -0.50    0.40
  -2   2  17   -0.60    0.70
   2   0  17   -0.10    0.40
   0  -2  17   -0.70    0.30
   2   0  17   -0.10    0.40
   0  -2  17    0.10    0.50
  -2   2  17    0.20    0.30
  -1  -2 -17  390.76   21.60
   3  -1 -17  406.46   21.70
  -2   3 -17  401.06   21.50
  -1  -2 -17  418.56   21.60
  -1  -2 -17  433.76   21.70
   1   2  17  409.06   21.70
   2  -3  17  394.16   20.90
   2  -3  17  414.66   21.50
  -3   1  17  403.56   21.90
   2  -3  17  407.76   20.90
  -1   4 -17   10.50    1.60
  -3  -1 -17   13.60    1.80
  -3  -1 -17   14.20    2.10
   4  -3 -17   12.40    2.10
  -1   4 -17   10.80    1.60
  -3  -1 -17    6.90    1.50
   4  -3 -17   12.90    1.40
   1  -4  17   11.10    1.90
  -4   3  17   11.70    1.30
   3   1  17   10.80    1.60
   1  -4  17   16.10    2.10
  -4   3  17   12.40    2.40
   1  -3 -17  396.66   21.70
   1  -3 -17  411.76   21.40
   2   1 -17  403.36   20.60
  -3   2 -17  392.76   21.50
   3  -2  17  384.46   21.50
  -2  -1  17  420.66   20.60
  -2  -1  17  438.56   22.20
  -2  -1  17  403.16   21.60
  -1   3  17  403.36   21.30
  -2  -3 -17  103.39    6.80
  -2  -3 -17  110.99    6.90
   5  -2 -17   93.09    6.70
  -3   5 -17  110.29    6.20
  -2  -3 -17  102.49    6.80
  -3   5 -17  104.79    6.80
   2   3  17  105.59    6.80
   3  -5  17  115.69    6.90
   2   3  17   94.99    6.80
  -5   2  17  108.19    7.30
   3  -5  17  106.59    6.20
  -4  -2 -17  221.88   12.70
  -2   6 -17  235.78   12.40
   6  -4 -17  216.48   12.80
  -4  -2 -17  212.78   12.40
  -4  -2 -17  222.58   12.70
   6  -4 -17  220.58   11.60
  -2   6 -17  216.88   12.40
  -6   4  17  212.68   11.50
   2  -6  17  204.88   12.40
  -6   4  17  196.68   13.00
   2  -6  17  203.68   12.30
   4   2  17  213.88   12.40
   3  -4 -17   13.80    1.80
  -4   1 -17   13.40    2.00
   1   3 -17    9.40    1.40
  -4   1 -17   10.00    1.00
   3  -4 -17   10.10    2.00
   4  -1  17   11.40    1.00
  -1  -3  17   11.60    1.50
  -3   4  17   13.90    1.70
  -1  -3  17   12.50    1.80
   4  -1  17   11.90    1.90
  -3   4  17    8.40    1.90
  -1  -3  17   15.50    2.20
   4   0 -17   -0.20    0.50
   0  -4 -17    2.40    1.10
   0  -4 -17    0.80    0.80
  -4   4 -17    0.60    0.70
   0   4  17    0.10    0.50
   0   4  17    2.70    1.30
  -4   0  17    0.20    0.60
   4  -4  17    0.50    0.70
  -4   0  17   -0.50    0.80
  -4   7 -17   26.00    3.80
  -3  -4 -17   27.40    3.40
   7  -3 -17   22.70    1.70
  -3  -4 -17   23.80    3.30
  -7   3  17   34.30    4.50
   4  -7  17   26.50    3.30
   3   4  17   25.60    3.60
  -7   3  17   25.00    1.70
   4  -7  17   24.10    2.50
   8  -5 -17   18.30    2.10
  -3   8 -17   18.40    2.80
  -5  -3 -17   16.50    2.90
  -5  -3 -17   20.20    3.20
  -8   5  17   15.20    2.00
   3  -8  17   15.80    2.80
  -8   5  17   15.10    3.30
   5   3  17   17.60    2.90
  -5   0 -17   -0.50    0.60
   0   5 -17    0.50    0.90
   5  -5 -17    1.30    1.10
   5  -5 -17    1.30    0.80
   0   5 -17   -0.10    0.60
  -5   0 -17    0.10    0.70
  -5   0 -17    0.10    0.50
   0  -5  17   -0.30    0.50
  -5   5  17    1.00    0.70
   0  -5  17    1.00    1.00
  -5   5  17    1.00    1.20
   5   0  17    0.10    0.50
  -5   3 -17  101.69    6.80
   3   2 -17  115.29    5.70
   2  -5 -17  110.49    6.70
   2  -5 -17  104.29    7.10
  -2   5  17  117.59    7.40
  -3  -2  17   90.99    6.70
  -2   5  17  106.49    6.50
  -3  -2  17   91.59    6.80
  -3  -2  17  102.59    5.70
   5  -3  17   99.59    6.70
  -1  -5 -17   18.80    2.90
   6  -1 -17   15.10    2.50
  -5   6 -17   18.10    1.60
  -5   6 -17   22.00    3.10
  -1  -5 -17   13.30    2.50
  -6   1  17   15.10    2.80
   1   5  17   18.10    3.00
  -6   1  17   11.70    2.50
   5  -6  17   18.60    2.70
   5  -6  17   20.80    1.70
   1   5  17   18.90    2.70
   9  -4 -17   76.69    4.70
  -5   9 -17   79.19    5.70
  -4  -5 -17   77.09    6.40
   5  -9  17   75.19    6.20
  -9   4  17   79.29    4.80
   4   5  17   83.99    6.60
   5  -9  17   74.09    5.70
  -9   4  17   79.19    7.00
  -6  -4 -17   10.80    2.50
  -4  10 -17   17.40    3.40
  10  -6 -17   14.80    2.00
   6   4  17   11.20    2.60
   4 -10  17   10.90    2.70
 -10   6  17    5.10    2.40
 -10   6  17   11.70    1.90
  -6  -1 -17   87.89    6.30
  -1   7 -17   78.49    6.10
  -1   7 -17   78.59    5.80
   7  -6 -17   80.69    5.50
  -6  -1 -17   93.19    6.10
   6   1  17   85.09    5.80
  -7   6  17   82.49    5.50
  -7   6  17   84.79    6.90
   1  -7  17   83.29    6.30
   1  -7  17   84.59    6.00
   2   4 -17  224.28   12.80
   2   4 -17  214.08   11.80
   4  -6 -17  227.88   12.40
  -6   2 -17  208.38   12.70
   4  -6 -17  191.88   12.90
  -6   2 -17  234.28   11.40
  -6   2 -17  208.98   11.40
  -4   6  17  202.18   13.20
  -2  -4  17  214.98   13.60
  -2  -4  17  220.18   12.60
  -2  -4  17  220.88   11.90
  -4   6  17  221.78   12.30
   6  -2  17  201.78   12.60
   1  -6 -17   21.20    3.20
   1  -6 -17   19.10    2.80
  -6   5 -17   17.30    2.80
  -1   6  17   22.70    2.80
  -5  -1  17   22.60    3.30
  -1   6  17   17.10    3.00
  -5  -1  17   16.80    2.90
   6  -5  17   18.50    2.70
  -6   8 -17  132.99    8.10
  -2  -6 -17  114.19    8.40
  -8   2  17  127.49    9.00
   6  -8  17  119.69    7.50
   6  -8  17  116.49    8.40
  -5  -6 -17   -0.70    1.70
 -11   5  17    1.70    2.10
   5   6  17    3.30    1.80
 -11   5  17    3.20    1.00
  -7  -5 -17    8.50    2.80
  -5  12 -17   12.70    2.80
  12  -7 -17   12.50    2.00
   5 -12  17    8.50    3.60
 -12   7  17   10.50    3.40
  -7  -2 -17    0.10    0.90
   9  -7 -17   -0.20    0.70
  -2   9 -17    0.60    1.00
   2  -9  17   -0.80    0.90
  -9   7  17   -0.30    1.30
   7   2  17   -1.20    0.70
  -7   1 -17   85.79    5.50
   1   6 -17   80.99    5.60
   1   6 -17   84.89    6.40
  -7   1 -17   84.89    6.30
  -7   1 -17   81.09    5.30
   6  -7 -17   86.09    5.90
  -6   7  17   89.99    7.10
  -1  -6  17   77.69    5.70
  -6   7  17   81.59    6.10
   3  -7 -17   31.80    3.50
   4   3 -17   24.40    2.00
  -3   7  17   26.20    3.20
  -4  -3  17   25.70    2.10
  -3   7  17   27.20    4.10
  -4  -3  17   20.50    3.10
   7  -4  17   26.30    3.50
  -7   7 -17   -0.10    0.50
   0  -7 -17   -0.40    1.00
  -7   0  17    1.10    1.40
   7  -7  17    0.80    1.10
   0   7  17    1.40    1.30
   7  -7  17    0.10    0.40
  -7  10 -17    0.70    1.00
  -3  -7 -17    1.50    1.20
   3   7  17    2.80    1.80
   7 -10  17    0.60    1.00
 -10   3  17    0.60    0.40
   7 -10  17    1.90    1.40
 -10   3  17   -1.20    1.30
 -10   3  17    0.20    0.40
  -7  13 -17    1.90    1.40
  -3  11 -17    4.00    2.00
  -8  -3 -17    3.80    2.20
  11  -8 -17    4.10    1.40
   3 -11  17   -1.30    1.70
   8   3  17    1.80    1.60
  -8   0 -17    0.60    1.10
   0   8 -17    0.10    1.10
  -8   0 -17    0.40    0.70
  -8   0 -17   -0.10    0.80
   8  -8 -17    0.00    0.80
  -8   8  17    0.70    0.90
   0  -8  17    0.60    1.20
  -8   8  17   -0.40    0.90
   3   5 -17   20.60    2.30
  -8   3 -17   16.90    1.70
  -8   3 -17   17.40    1.70
   3   5 -17   16.30    3.60
   5  -8 -17   14.00    2.60
  -5   8  17   26.90    4.30
   8  -3  17   13.30    2.70
  -3  -5  17   14.60    3.20
  -3  -5  17   17.80    2.40
   2  -8 -17  120.89    8.30
   8  -6  17  122.29    8.20
  -2   8  17  114.99    8.70
  -6  -2  17  113.99    8.30
  -6  -2  17  112.89    6.40
  -6  -2  17  113.89    6.50
  -1  -8 -17   26.10    4.20
   8  -9  17   20.00    2.30
   1   8  17   26.90    4.30
   8  -9  17   22.30    3.50
  -9   1  17   21.90    4.10
  -8  12 -17    4.20    1.70
   4   8  17    2.90    2.50
 -12   4  17   -0.70    2.50
  -9  -1 -17   17.50    2.90
  10  -9 -17   10.50    2.30
  -1  10 -17   13.50    3.20
  -9  -1 -17   14.00    3.10
   1 -10  17   18.10    3.30
 -10   9  17   12.40    3.40
  -9   2 -17    0.10    0.70
   2   7 -17   -0.50    1.20
  -9   2 -17    0.80    1.10
  -9   2 -17    0.00    0.70
   7  -9 -17    0.50    1.10
  -7   9  17   -0.30    1.10
  -2  -7  17    0.80    0.90
   5   4 -17   77.59    5.10
   4  -9 -17   82.79    6.40
  -9   5 -17   77.59    4.60
  -9   5 -17   81.59    4.60
  -4   9  17   81.29    7.10
  -5  -4  17   81.89    5.30
  -5  -4  17   80.49    6.50
   9  -5  17   83.09    6.50
  -9   8 -17   21.80    1.80
   1  -9 -17   20.70    3.60
  -8  -1  17   20.30    1.60
  -8  -1  17   20.40    1.60
   9  -8  17   27.10    4.00
  -8  -1  17   17.60    3.50
  -1   9  17   24.10    4.30
   9  -8  17   19.50    1.60
  -9  11 -17   31.10    3.60
  -2  -9 -17   25.60    4.50
 -11   2  17   30.90    5.50
   9 -11  17   31.30    4.60
   2   9  17   24.70    4.60
  12 -10 -17    0.40    1.20
 -10  -2 -17    2.40    1.80
   9 -10 -17   14.70    2.80
 -10   1 -17   20.10    3.50
 -10   1 -17    8.60    2.10
 -10   1 -17   11.90    2.50
   1   9 -17   17.10    3.60
  -9  10  17   14.90    3.70
  -1  -9  17   12.80    2.70
 -10   4 -17    9.90    1.70
   6 -10 -17   11.10    2.50
   4   6 -17    6.40    1.60
 -10   4 -17   10.00    1.70
  -4  -6  17   10.50    2.00
  -4  -6  17    6.80    2.20
  -6  10  17   10.30    3.00
  10  -4  17   12.60    2.70
   3 -10 -17    0.60    1.20
  -7  -3  17    2.10    1.60
  -7  -3  17    0.60    0.60
  10  -7  17    2.30    1.70
  -3  10  17   -1.00    1.10
   0 -10 -17   -0.90    1.20
  10 -10  17    1.50    1.70
 -10   0  17    1.00    1.80
   0  10  17   -0.80    1.50
 -11   0 -17    1.20    1.50
  11 -11 -17   -0.50    1.10
   0 -11  17    0.00    1.20
   3   8 -17    4.00    2.10
   8 -11 -17    4.60    2.00
 -11   3 -17    4.70    1.50
  -3  -8  17    2.60    1.40
  -8  11  17    3.10    2.10
   5 -11 -17    3.70    1.80
 -11   6 -17    3.00    0.80
  -5  11  17    9.00    3.50
  -6  -5  17    2.30    1.90
  11  -6  17    3.60    1.80
  -6  -5  17    3.50    1.30
   2 -11 -17   18.00    3.60
  -2  11  17   25.70    4.70
  11  -9  17   33.30    4.90
  -9  -2  17   32.40    5.00
  10 -12 -17    2.10    1.60
  -2 -10  17    4.60    1.90
   7 -12 -17   11.20    3.10
  12  -5  17   13.20    3.20
  -5  -7  17   16.00    2.80
   0   0 -18  174.98    9.20
   0   0 -18  170.08    9.10
   0   0  18  155.18    9.10
   0   0  18  166.58    9.30
  -1   2 -18 1046.00   67.29
  -1  -1 -18 1056.59   66.39
   2  -1 -18  983.20   66.69
   2  -1 -18 1110.89   67.09
  -1   2 -18 1140.09   65.79
  -1  -1 -18 1044.90   65.89
  -2   1  18  913.31   67.69
   1  -2  18 1012.30   66.79
   1   1  18 1096.49   66.09
   1  -2  18 1034.00   65.59
   1   1  18 1018.90   67.49
   1  -2 -18  915.21   66.19
   1  -2 -18 1081.19   65.79
   1   1 -18 1040.90   66.39
  -2   1 -18 1114.69   65.99
  -2   1 -18 1023.30   63.69
   1   1 -18 1154.58   65.19
  -1  -1  18 1004.70   66.09
   2  -1  18 1022.20   64.39
  -1   2  18 1062.19   66.49
   2  -1  18  992.30   64.39
  -1  -1  18  914.81   64.89
  -1   2  18 1010.00   68.59
  -2   4 -18  776.72   41.60
  -2  -2 -18  822.32   41.60
   4  -2 -18  831.02   40.50
  -2  -2 -18  864.11   41.90
   4  -2 -18  805.32   41.90
  -2  -2 -18  813.32   41.80
   2   2  18  777.62   41.60
  -4   2  18  770.52   42.10
   2  -4  18  792.82   41.20
  -4   2  18  801.22   40.50
   2  -4  18  809.02   41.60
  -3   0 -18   46.50    3.50
  -3   0 -18   46.50    3.50
  -3   0 -18   39.80    2.80
   3  -3 -18   51.09    3.80
   0   3 -18   39.90    3.20
   3  -3 -18   37.80    2.80
  -3   3  18   44.90    3.80
  -3   3  18   40.20    2.80
   3   0  18   46.70    2.90
   0  -3  18   36.40    3.00
   0  -3  18   39.90    2.90
   3   0  18   47.70    3.50
   0  -3  18   40.40    3.20
   0  -3 -18 3559.54  232.28
  -3   3 -18 4095.59  214.28
  -3   3 -18 4162.38  218.78
   0  -3 -18 4249.47  220.48
   3   0 -18 4231.08  214.18
  -3   0  18 4118.49  218.38
   3  -3  18 3958.60  214.28
   3  -3  18 3913.61  216.18
  -3   0  18 3759.22  216.28
   0   3  18 3821.32  218.58
   0   3  18 4096.99  216.38
  -3  -3 -18  340.07   17.50
  -3  -3 -18  311.57   17.40
  -3  -3 -18  301.67   17.30
  -3   6 -18  285.17   17.60
   6  -3 -18  298.07   15.80
  -3   6 -18  318.57   16.70
   6  -3 -18  309.47   17.40
   3   3  18  310.27   17.30
   3  -6  18  317.87   17.30
  -6   3  18  317.97   15.90
  -6   3  18  291.77   17.80
   3  -6  18  299.27   16.80
  -4  -1 -18  655.83   33.90
  -1   5 -18  612.24   33.40
  -1   5 -18  625.14   33.50
  -4  -1 -18  629.64   33.30
   5  -4 -18  668.83   32.90
  -4  -1 -18  597.54   34.60
  -5   4  18  637.84   34.40
   4   1  18  656.03   33.30
  -5   4  18  638.54   32.80
   1  -5  18  663.43   33.70
   1  -5  18  655.13   33.50
   2  -4 -18  846.72   43.30
  -4   2 -18  789.82   43.00
   2   2 -18  819.12   41.90
  -2  -2  18  797.12   43.00
  -2   4  18  902.11   43.60
   4  -2  18  823.72   43.00
  -2  -2  18  861.31   42.00
  -2   4  18  798.82   42.50
  -2  -2  18  834.02   43.00
  -4   5 -18  440.36   21.40
  -1  -4 -18  426.46   22.70
  -1  -4 -18  409.16   22.80
  -4   5 -18  404.46   22.50
  -5   1  18  433.06   23.00
   4  -5  18  374.36   21.40
   1   4  18  449.06   23.00
   1   4  18  411.66   23.00
   4  -5  18  412.96   22.50
   8  -4 -18  303.07   15.60
  -4  -4 -18  310.37   18.20
  -4  -4 -18  274.57   17.70
  -4   8 -18  307.87   16.70
   4   4  18  269.07   17.10
  -8   4  18  306.67   15.70
   4  -8  18  302.07   16.80
  -8   4  18  302.87   18.10
  -2   7 -18  232.08   13.70
  -5  -2 -18  248.38   14.20
   7  -5 -18  225.88   12.90
  -2   7 -18  236.28   13.90
  -5  -2 -18  234.08   13.80
   2  -7  18  238.28   13.90
  -7   5  18  234.68   14.80
   5   2  18  263.37   13.90
  -7   5  18  246.78   13.00
   2  -7  18  229.28   13.90
  -5   1 -18  580.94   34.60
  -5   1 -18  635.54   32.30
   1   4 -18  634.94   32.70
   4  -5 -18  636.24   32.90
  -5   1 -18  600.54   32.20
   4  -5 -18  606.04   35.80
   1   4 -18  656.03   33.40
  -1  -4  18  604.94   33.40
   5  -1  18  638.04   33.50
  -1  -4  18  623.64   33.20
  -4   5  18  624.64   32.80
  -1  -4  18  651.43   32.80
  -4   5  18  732.33   34.40
   1  -5 -18  413.16   23.40
   1  -5 -18  423.46   23.00
  -4  -1  18  471.25   23.40
   5  -4  18  425.36   23.10
  -4  -1  18  398.66   23.80
  -1   5  18  442.46   23.60
  -1   5  18  413.06   22.80
  -5   7 -18  396.16   21.20
  -2  -5 -18  434.16   22.60
  -2  -5 -18  389.76   22.60
   5  -7  18  382.36   21.40
   2   5  18  390.66   22.60
  -7   2  18  439.46   23.10
   5  -7  18  398.46   22.30
  10  -5 -18   93.09    5.90
  -5  10 -18  103.19    7.20
  -5  -5 -18  109.79    8.00
   5 -10  18   93.79    7.50
 -10   5  18  103.09    8.50
   5   5  18  111.59    8.00
 -10   5  18   95.99    6.00
   9  -6 -18   28.70    2.60
  -3   9 -18   28.80    3.90
  -6  -3 -18   28.50    3.90
   3  -9  18   40.50    4.60
  -9   6  18   24.50    4.20
  -9   6  18   32.50    2.70
   6   3  18   32.10    4.20
   0   6 -18  359.76   19.50
   6  -6 -18  349.27   18.80
  -6   0 -18  345.87   19.50
   0   6 -18  329.37   18.90
  -6   0 -18  339.67   18.70
  -6   6  18  347.67   18.70
   6   0  18  363.76   18.70
   0  -6  18  372.46   19.80
  -6   6  18  312.57   20.00
   0  -6  18  350.66   19.00
   3  -6 -18  296.37   17.50
  -6   3 -18  312.57   17.20
   3  -6 -18  303.87   16.90
   3   3 -18  308.67   15.90
   6  -3  18  306.87   17.10
  -3   6  18  303.17   16.70
  -3  -3  18  311.97   16.00
  -3   6  18  274.47   17.50
  -3  -3  18  319.87   17.10
  -3  -3  18  290.97   17.30
   0  -6 -18  434.96   23.30
  -6   6 -18  416.46   21.30
   6  -6  18  432.26   23.20
   0   6  18  405.76   23.60
  -6   0  18  437.36   23.60
   6  -6  18  405.46   21.30
  -3  -6 -18  260.57   14.90
  -6   9 -18  245.58   13.50
  -9   3  18  247.28   12.20
  -9   3  18  230.68   12.20
  -9   3  18  214.68   14.90
   6  -9  18  215.68   13.40
   3   6  18  237.88   14.90
   6  -9  18  231.98   14.40
  -6  12 -18   39.90    5.10
   6   6  18   59.99    7.00
 -12   6  18   43.20    6.40
  11  -7 -18   72.09    5.40
  -4  11 -18   85.09    6.80
  -7  -4 -18   58.89    8.70
   7   4  18   90.89    7.10
   4 -11  18  111.79   12.90
 -11   7  18   93.19   11.50
  -1   8 -18    1.40    1.10
   8  -7 -18    1.50    0.90
  -7  -1 -18    2.40    1.80
  -7  -1 -18    0.50    1.00
  -8   7  18    2.50    1.80
   1  -8  18    2.70    1.20
  -8   7  18   -0.10    0.50
   7   1  18    1.40    1.00
  -7   2 -18  231.38   12.90
  -7   2 -18  238.48   13.00
   5  -7 -18  252.87   14.00
   2   5 -18  240.08   14.40
   2   5 -18  240.48   13.40
  -5   7  18  239.08   13.80
  -2  -5  18  251.67   13.60
  -2  -5  18  221.78   14.00
   7  -2  18  243.58   14.40
  -5   7  18  281.57   15.50
   2  -7 -18  391.66   21.90
  -5  -2  18  394.16   20.20
  -5  -2  18  396.36   20.20
  -5  -2  18  399.56   22.10
   7  -5  18  393.56   21.90
  -2   7  18  383.86   22.50
  -1  -7 -18  548.85   29.70
  -7   8 -18  563.84   27.90
   7  -8  18  567.44   29.60
   7  -8  18  499.35   28.50
   1   7  18  554.84   30.10
  -8   1  18  483.85   29.70
  -4  -7 -18   23.10    4.10
  -7  11 -18   17.30    2.90
   7 -11  18   18.00    3.40
   4   7  18   21.80    4.40
 -11   4  18   20.10    1.60
  -5  13 -18   39.30    5.30
  -8  -2 -18   62.59    5.90
  10  -8 -18   60.49    4.90
  -2  10 -18   76.79    6.20
  -8  -2 -18   72.89    5.60
   2 -10  18   59.99    5.70
 -10   8  18   58.09    7.50
   8   2  18   70.79    5.70
  -8   1 -18    0.10    0.70
   7  -8 -18    0.90    0.90
   1   7 -18    1.70    1.30
  -8   1 -18    0.70    0.80
  -8   1 -18    0.80    1.10
   1   7 -18    0.90    0.90
  -7   8  18    3.30    1.40
  -7   8  18    1.00    1.40
  -1  -7  18   -0.30    0.60
   4   4 -18  300.67   16.50
   4  -8 -18  319.67   17.80
  -4  -4  18  332.77   18.10
   8  -4  18  285.67   17.70
  -4   8  18  306.47   18.60
   1  -8 -18  564.04   29.40
   8  -7  18  567.34   29.30
  -1   8  18  467.95   29.50
  -7  -1  18  518.45   29.40
  -8  10 -18   57.39    4.20
  -2  -8 -18   61.19    6.50
 -10   2  18   47.00    6.20
   8 -10  18   48.10    4.00
   2   8  18   59.39    6.00
   8 -10  18   53.59    6.00
  -3  12 -18   11.50    3.00
  12  -9 -18   17.90    2.70
  -9  -3 -18   13.40    2.80
   9  -9 -18  232.58   13.30
  -9   0 -18  214.38   13.70
  -9   0 -18  194.18   13.00
   0   9 -18  210.98   13.90
  -9   0 -18  219.98   12.90
   0  -9  18  234.78   13.60
  -9   9  18  220.68   14.90
   3   6 -18   25.30    3.90
   3   6 -18   31.80    3.70
  -9   3 -18   25.90    2.40
   6  -9 -18   36.20    4.40
  -3  -6  18   30.60    3.50
  -6   9  18   32.30    5.00
  -3  -6  18   44.30    5.00
   9  -3  18   30.00    4.10
   3  -9 -18  255.07   15.00
  -6  -3  18  260.07   15.30
   9  -6  18  240.68   14.80
  -3   9  18  216.98   15.30
  -6  -3  18  243.68   13.20
  -6  -3  18  240.68   13.10
   0  -9 -18   28.40    4.40
  -9   9 -18   35.10    2.60
   9  -9  18   41.10    5.00
   0   9  18   27.30    4.60
   9  -9  18   31.10    2.30
  -9   0  18   33.50    5.10
 -10  -1 -18  149.29   10.00
  11 -10 -18  137.69    9.60
  -1  11 -18  132.89   10.60
 -10  -1 -18  153.48   10.80
   1 -11  18  154.98   10.70
 -11  10  18  189.38   16.30
 -10   2 -18   73.29    6.20
 -10   2 -18   66.29    5.00
   8 -10 -18   73.89    6.00
 -10   2 -18   67.29    5.10
   2   8 -18   62.99    6.20
  -8  10  18   66.49    6.80
  -2  -8  18   76.09    5.80
   5 -10 -18  103.99    7.70
 -10   5 -18   98.29    5.60
   5   5 -18   98.89    6.40
 -10   5 -18   97.29    5.60
  -5  -5  18  100.49    6.50
  -5  10  18  104.79    8.60
  -5  -5  18  103.99    7.90
  10  -5  18  103.49    7.70
   2 -10 -18   58.09    6.30
  -8  -2  18   44.90    5.90
  -8  -2  18   49.20    3.20
  -8  -2  18   50.99    3.20
  -2  10  18   55.29    6.90
  10  -8  18   60.19    5.50
   1  10 -18  147.89   11.60
 -11   1 -18  136.09   10.20
  10 -11 -18  151.18   10.30
 -11   1 -18  159.08   10.90
  -1 -10  18  160.98   10.60
   7 -11 -18   85.29    7.20
  -4  -7  18  103.69    7.90
  -7  11  18   73.69    7.80
  11  -4  18  117.59   13.00
   4 -11 -18    8.80    3.20
  -7  -4  18   24.60    4.50
  -4  11  18   21.10    4.60
  11  -7  18   18.90    3.60
  -7  -4  18   19.20    2.40
   9 -12 -18   13.90    3.10
  -3  -9  18    9.00    2.50
   6 -12 -18   50.99    6.10
  12  -6  18   33.50    5.00
  -6  -6  18   52.39    4.20
   1  -1 -19    0.80    0.40
   0   1 -19    0.90    0.50
  -1   0 -19    0.30    0.40
   0   1 -19    0.40    0.40
   1  -1 -19    0.60    0.40
  -1   0 -19    0.30    0.40
   1  -1 -19    1.50    0.70
  -1   1  19    0.90    0.80
   1   0  19    0.00    0.50
   1   0  19    0.50    0.50
   0  -1  19    0.20    0.50
   0  -1  19    0.30    0.40
  -2  -1 -19  286.07   15.40
   3  -2 -19  273.87   15.80
  -2  -1 -19  292.87   15.80
   3  -2 -19  300.17   14.90
  -1   3 -19  288.07   15.40
  -2  -1 -19  283.87   15.70
   1  -3  19  284.27   15.20
   2   1  19  308.07   15.50
   1  -3  19  276.97   15.30
   1  -3  19  293.87   15.50
  -3   2  19  295.77   16.20
  -3   2  19  267.47   14.80
  -2   2 -19    0.20    0.50
   0  -2 -19    0.20    0.50
   0  -2 -19    0.00    0.50
   2   0 -19    0.40    0.60
   2   0 -19    0.30    0.30
   2   0 -19    0.20    0.20
   0  -2 -19    1.10    0.80
   2  -2  19    0.40    0.40
   2  -2  19    0.30    0.60
   2  -2  19    0.80    0.40
   0   2  19    0.60    0.70
  -2   0  19    1.20    0.80
  -2   5 -19    0.90    0.70
  -3  -2 -19    2.10    1.00
  -2   5 -19    0.10    0.50
  -3  -2 -19    0.20    0.60
   5  -3 -19    0.50    0.30
   2  -5  19    0.40    0.70
   3   2  19    0.00    0.70
  -5   3  19    0.20    0.30
  -5   3  19   -0.40    0.90
   2  -5  19    0.10    0.50
   2  -3 -19  277.87   15.80
   1   2 -19  282.37   14.80
   2  -3 -19  272.97   15.10
  -3   1 -19  281.77   14.50
  -3   1 -19  278.27   15.60
  -2   3  19  271.47   15.90
   3  -1  19  297.67   14.50
  -1  -2  19  271.67   15.40
  -1  -2  19  282.97   15.50
   3  -1  19  285.57   15.60
  -2   3  19  322.07   15.50
  -1  -2  19  278.27   14.80
   4  -1 -19   63.99    4.90
  -1  -3 -19   77.49    5.10
  -1  -3 -19   67.29    5.00
  -3   4 -19   70.89    4.90
   3  -4  19   68.99    4.10
  -4   1  19   75.89    5.40
   1   3  19   76.79    5.20
   3  -4  19   69.19    4.00
   3  -4  19   73.59    4.90
   1   3  19   69.19    4.90
  -4  -3 -19   26.40    3.40
  -3   7 -19   25.70    3.00
  -3   7 -19   35.80    4.00
  -4  -3 -19   24.50    3.50
   7  -4 -19   27.00    2.00
   3  -7  19   36.00    3.80
   3  -7  19   24.90    3.20
   4   3  19   27.70    3.50
  -7   4  19   21.90    3.60
  -7   4  19   25.00    2.00
  -4   0 -19    1.30    0.60
   4  -4 -19   -0.10    0.40
  -4   0 -19    0.30    0.60
   0   4 -19    0.10    0.50
  -4   0 -19    0.10    0.70
   4  -4 -19   -0.30    0.70
   0  -4  19   -0.50    0.40
  -4   4  19    0.50    1.00
   4   0  19    0.30    0.50
   0  -4  19    0.30    0.70
  -4   4  19    0.10    0.40
   0  -4  19    0.70    0.70
   1  -4 -19   75.19    5.00
   1  -4 -19   66.29    5.20
  -4   3 -19   78.29    5.20
  -3  -1  19   68.29    5.10
  -1   4  19   71.29    4.80
  -3  -1  19   80.59    5.40
  -1   4  19   72.49    5.40
   4  -3  19   70.89    5.00
  -4   6 -19   79.29    4.60
  -2  -4 -19   80.59    5.60
  -2  -4 -19   83.59    5.70
  -4   6 -19   71.69    5.40
   6  -2 -19   71.09    5.40
   2   4  19   56.69    5.30
  -6   2  19   63.59    5.70
   4  -6  19   72.69    5.40
   4  -6  19   75.09    4.70
   2   4  19   74.09    5.40
  -5  -4 -19  120.39    8.60
   9  -5 -19  120.79    6.90
  -4   9 -19  128.89    8.10
   4  -9  19  126.39    8.30
  -9   5  19  119.39    7.00
  -9   5  19  117.59    9.30
   4  -9  19  110.89    8.30
   5   4  19  120.39    8.80
  -1   6 -19  102.79    6.70
  -5  -1 -19  101.49    7.10
  -5  -1 -19   95.49    6.50
   6  -5 -19  110.49    6.30
  -1   6 -19  104.99    6.90
   1  -6  19   87.99    6.80
  -6   5  19  105.49    6.20
  -6   5  19  107.89    7.80
   1  -6  19  100.19    6.70
   5   1  19  108.19    6.60
   2   3 -19   -0.10    0.30
   3  -5 -19    0.60    1.50
   3  -5 -19    1.10    0.70
  -2  -3  19    0.70    0.80
  -2  -3  19    0.30    0.50
  -2  -3  19    1.00    0.80
  -3   5  19    1.70    1.20
  -3   5  19    0.70    0.60
   5  -2  19    0.00    0.60
   0  -5 -19    0.40    0.80
   0  -5 -19    2.60    1.20
  -5   5 -19    1.00    0.80
   5  -5  19    0.50    0.80
   0   5  19    0.40    0.90
  -5   0  19   -0.30    0.80
  -5   0  19   -0.30    0.60
   0   5  19    0.50    0.80
  -5   8 -19   19.20    2.40
  -3  -5 -19   14.50    2.90
   5  -8  19   18.30    2.50
  -8   3  19   19.80    3.70
   5  -8  19   13.70    2.60
   3   5  19   17.70    3.10
  -5  11 -19   28.70    4.00
  -6  -5 -19   26.40    4.40
  11  -6 -19   28.00    2.40
   6   5  19   36.00    5.10
   5 -11  19   20.60    4.80
   8  -6 -19    9.00    1.60
  -2   8 -19    9.50    2.20
  -6  -2 -19    6.90    2.00
  -6  -2 -19    9.70    2.20
  -8   6  19    8.70    2.70
   6   2  19   11.40    2.20
   2  -8  19   10.00    2.10
   2  -8  19    7.70    2.00
  -8   6  19   10.30    1.70
   5  -6 -19   99.99    6.50
   1   5 -19  107.79    6.40
  -6   1 -19   99.39    6.00
   1   5 -19   99.99    7.00
  -6   1 -19   98.69    5.80
   6  -1  19  100.89    7.00
  -5   6  19  109.09    6.50
  -5   6  19  104.19    7.60
  -1  -5  19   99.09    7.10
  -1  -5  19   94.79    6.30
   2  -6 -19   79.79    5.70
  -6   4 -19   85.99    5.90
   2  -6 -19   79.09    6.10
  -4  -2  19   72.69    5.70
  -4  -2  19   77.99    4.30
  -4  -2  19   70.59    5.80
  -4  -2  19   77.69    4.30
   6  -4  19   73.99    5.70
  -2   6  19   80.69    5.50
  -2   6  19   89.59    6.50
  -6   7 -19  189.38   10.40
  -1  -6 -19  202.18   12.40
  -7   1  19  200.98   12.50
   1   6  19  197.18   12.50
   6  -7  19  187.48   10.40
   6  -7  19  186.78   12.40
  -6  10 -19   -0.30    0.60
  -4  -6 -19    0.80    1.20
 -10   4  19    0.60    1.70
 -10   4  19    0.30    0.40
   4   6  19    1.20    1.50
   6 -10  19    1.20    0.90
 -10   4  19   -0.40    0.30
   6 -10  19   -1.30    0.70
  -6  13 -19    2.90    1.70
  -3  10 -19    1.00    1.20
  -7  -3 -19    0.60    1.30
  10  -7 -19    1.10    0.90
 -10   7  19    1.30    1.60
 -10   7  19    0.30    0.70
   3 -10  19    2.10    1.30
   7   3  19    2.50    1.60
   0   7 -19    0.20    0.70
  -7   0 -19    1.30    0.90
  -7   0 -19   -0.40    0.60
   7  -7 -19   -0.10    0.60
  -7   0 -19   -0.50    0.80
   0   7 -19    0.90    1.00
   0  -7  19   -1.30    0.50
  -7   7  19   -0.60    0.50
  -7   7  19    0.60    1.20
   3   4 -19   28.20    2.20
   4  -7 -19   33.00    3.80
  -4   7  19   27.70    3.30
  -3  -4  19   23.10    3.30
   7  -3  19   23.00    3.40
  -4   7  19   25.60    3.90
  -3  -4  19   25.40    2.30
   1  -7 -19  195.88   13.30
  -6  -1  19  227.78   13.50
   7  -6  19  213.78   13.00
  -2  -7 -19   33.90    4.60
  -7   9 -19   28.80    2.90
  -9   2  19   29.50    4.40
   2   7  19   27.80    4.50
   7  -9  19   28.90    2.70
   7  -9  19   41.70    4.90
  -7  12 -19    5.50    1.90
   5   7  19    5.30    2.40
  -4  12 -19    1.90    1.60
  12  -8 -19    2.10    1.20
   8   4  19    0.80    1.40
  -8  -1 -19    3.00    1.50
  -1   9 -19    0.30    1.00
  -8  -1 -19    0.60    0.90
   9  -8 -19    0.60    0.90
  -8  -1 -19   -0.70    0.70
   1  -9  19   -0.20    1.00
  -9   8  19    0.70    0.90
  -9   8  19    1.80    1.60
   6  -8 -19    9.20    2.10
   2   6 -19    9.40    2.30
   2   6 -19   14.60    2.10
  -8   2 -19   11.60    1.70
  -6   8  19   14.30    3.40
   8  -2  19    7.20    2.00
  -2  -6  19   13.60    2.20
   3  -8 -19   17.20    3.50
  -3   8  19   23.10    4.10
   8  -5  19   19.30    3.00
  -5  -3  19   17.30    1.60
  -5  -3  19   18.70    1.90
  -5  -3  19   18.30    3.20
  -8   8 -19    0.10    0.40
   0  -8 -19   -0.50    0.90
   8  -8  19    0.80    0.40
  -8   0  19    0.90    1.40
   0   8  19    1.80    1.40
   8  -8  19   -0.10    1.20
  -8  11 -19    0.20    0.90
  -3  -8 -19    0.10    1.40
   8 -11  19   -0.50    1.10
   3   8  19    1.30    1.80
 -11   3  19    1.50    2.30
  11  -9 -19   12.70    2.40
  -9  -2 -19   17.50    3.40
  -2  11 -19   23.40    4.00
  -9  -2 -19   18.00    3.10
   2 -11  19   21.80    3.70
 -11   9  19   21.20    4.40
  -9   1 -19    0.30    0.80
  -9   1 -19    1.10    1.00
   8  -9 -19   -1.20    0.80
   1   8 -19    0.30    1.20
  -9   1 -19    0.60    1.20
  -1  -8  19    0.50    1.00
  -8   9  19   -1.90    1.10
   5  -9 -19  116.59    8.30
   4   5 -19  114.89    7.20
   9  -4  19  125.19    8.70
  -4  -5  19  124.99    7.50
  -5   9  19  132.69    9.60
  -4  -5  19  110.19    8.40
   2  -9 -19   33.80    4.50
  -2   9  19   32.50    5.00
  -7  -2  19   34.20    4.90
  -7  -2  19   27.50    1.90
  -7  -2  19   29.60    2.00
   9  -7  19   34.00    4.40
  -1  -9 -19   11.80    3.10
  -9  10 -19   10.30    1.80
   1   9  19    7.30    2.90
   9 -10  19    7.50    2.50
 -10   1  19   11.60    3.50
 -10   0 -19   -0.20    1.90
 -10   0 -19    0.30    1.50
  10 -10 -19   -0.10    1.10
   0  10 -19    1.60    2.20
   0 -10  19    1.20    1.50
 -10  10  19    1.40    2.00
   7 -10 -19    2.00    1.40
 -10   3 -19    1.90    0.90
 -10   3 -19    0.60    1.30
 -10   3 -19    1.50    1.30
   3   7 -19    2.80    1.70
  -3  -7  19    2.40    1.20
  10  -3  19    1.50    1.50
  -3  -7  19    1.90    1.50
  -7  10  19    1.50    1.70
   4 -10 -19    2.20    1.50
  -6  -4  19    0.00    0.60
  -6  -4  19   -0.10    0.50
  -4  10  19   -0.40    1.30
  -6  -4  19   -1.60    1.10
  10  -6  19    0.30    1.00
   1 -10 -19    7.50    2.40
  10  -9  19   12.00    2.90
  -9  -1  19    7.70    2.70
  -1  10  19    8.10    3.00
   2   9 -19   16.10    3.60
   9 -11 -19   20.80    3.50
 -11   2 -19   16.10    3.50
 -11   2 -19   21.20    3.10
  -2  -9  19   17.80    3.20
  -9  11  19   18.30    4.30
   6 -11 -19   35.30    4.80
  -5  -6  19   31.20    4.80
  -6  11  19   29.00    5.30
  -5  -6  19   37.60    4.00
   3 -11 -19    0.20    1.30
  11  -8  19    0.30    1.40
  -8  -3  19    2.40    1.80
  -3  11  19   -0.60    1.50
  11 -12 -19    0.80    1.40
   8 -12 -19    0.50    1.30
  -4  -8  19    0.20    1.20
  -3 -10  19    1.00    1.60
   0  -1 -20  711.63   36.40
  -1   1 -20  679.53   35.90
   0  -1 -20  691.93   36.20
   1   0 -20  719.43   35.80
   1   0 -20  682.63   36.30
   1   0 -20  703.93   35.80
  -1   1 -20  687.63   36.20
   0  -1 -20  710.33   36.20
   1  -1  20  709.73   36.00
   0   1  20  715.33   36.40
   1  -1  20  700.03   36.20
  -1   0  20  752.12   36.60
  -2   0 -20    2.60    0.80
   2  -2 -20    2.10    1.00
   2  -2 -20    2.20    0.60
   0   2 -20    1.50    0.60
  -2   0 -20    1.80    0.70
  -2   0 -20    0.80    0.60
   2  -2 -20    2.30    0.60
   0  -2  20    1.40    0.80
  -2   2  20    2.20    1.20
   0  -2  20    2.30    0.80
   0  -2  20    2.60    0.70
   2   0  20    4.60    1.10
   2   0  20    2.50    0.70
  -2   3 -20 1310.47   66.69
  -1  -2 -20 1308.37   66.79
  -3  -1 -20  156.38    9.00
  -3  -1 -20  143.99    8.80
  -1   4 -20  144.59    8.50
  -3  -1 -20  141.49    8.70
   4  -3 -20  133.89    8.90
   4  -3 -20  144.69    7.90
   1  -4  20  140.79    8.50
   3   1  20  157.98    8.50
  -4   3  20  139.29    9.30
   1  -4  20  161.78    8.40
  -4   3  20  140.29    7.80
   1  -4  20  138.99    8.50
  -3   2 -20 1290.97   67.49
  -1   3  20 1354.46   67.19
   5  -2 -20  335.27   19.80
  -3   5 -20  372.86   18.90
  -2  -3 -20  348.37   19.80
  -3   5 -20  341.07   19.60
  -2  -3 -20  355.36   19.80
  -2  -3 -20  341.27   19.70
   3  -5  20  370.46   19.70
  -5   2  20  389.96   20.40
   2   3  20  387.96   20.00
   3  -5  20  357.76   18.90
  -4  -2 -20  862.41   44.80
   6  -4 -20  833.52   45.80
   6  -4 -20  832.82   43.40
  -4  -2 -20  812.62   45.40
  -4  -2 -20  826.52   44.40
  -2   6 -20  909.91   44.30
   4   2  20  894.71   44.40
   2  -6  20  837.52   44.30
   2  -6  20  851.41   44.50
  -6   4  20  848.22   43.40
  -6   4  20  886.01   45.60
  -4   1 -20  146.79    7.50
   3  -4 -20  127.69    8.70
  -4   1 -20  144.69    8.70
   3  -4 -20  141.39    8.10
   1   3 -20  141.89    7.90
   4  -1  20  134.09    7.40
  -1  -3  20  128.59    8.40
  -1  -3  20  148.19    7.90
  -3   4  20  150.98    9.20
   4  -1  20  145.59    8.70
  -3   4  20  133.59    8.00
  -1  -3  20  140.69    8.40
   0  -4 -20  498.85   25.70
   0  -4 -20  473.85   25.30
  -4   4 -20  462.85   25.30
  -4   0  20  443.96   25.50
   0   4  20  523.05   25.90
  -4   0  20  448.86   25.60
   0   4  20  456.35   25.20
   4  -4  20  483.45   25.40
  -4   7 -20  133.99    7.80
  -3  -4 -20  134.69    8.70
  -3  -4 -20  117.49    8.50
   4  -7  20  134.29    8.50
  -7   3  20  116.19    9.00
   4  -7  20  131.09    7.90
   3   4  20  132.89    8.70
  -5  -3 -20  150.68   10.10
  -3   8 -20  157.18    9.60
  -5  -3 -20  144.29    9.80
   8  -5 -20  163.58    8.60
  -8   5  20  159.08    8.60
   5   3  20  143.39    9.70
  -8   5  20  140.09   10.60
   5  -5 -20 1267.77   62.69
   0   5 -20 1183.08   62.09
   0   5 -20 1197.48   61.59
  -5   0 -20 1240.88   61.39
  -5   0 -20 1225.88   62.29
  -5   0 -20 1140.29   62.19
   5  -5 -20 1231.48   61.49
   0  -5  20 1139.69   62.09
  -5   5  20 1189.98   61.29
   0  -5  20 1249.38   61.69
   5   0  20 1197.68   61.29
  -5   5  20 1211.28   62.99
   3   2 -20  363.66   18.50
   2  -5 -20  375.36   19.80
  -5   3 -20  359.76   20.00
  -2   5  20  394.86   20.70
  -3  -2  20  358.76   18.60
  -3  -2  20  354.56   20.00
   5  -3  20  340.77   19.90
  -3  -2  20  380.06   20.30
  -2   5  20  355.36   19.60
  -1  -5 -20    5.80    1.70
  -5   6 -20    8.30    1.00
  -1  -5 -20    8.80    2.20
  -6   1  20    7.70    2.00
   5  -6  20    5.40    1.70
   1   5  20    5.20    1.80
   5  -6  20    7.30    1.00
  -4  -5 -20   72.99    6.20
  -5   9 -20   73.29    5.30
   5  -9  20   83.49    5.60
   4   5  20   70.19    6.10
  -9   4  20   68.79    4.00
  -9   4  20   65.39    6.60
  -9   4  20   69.99    4.00
   5  -9  20   80.39    6.20
  10  -6 -20  147.09    8.20
  -4  10 -20  126.99    9.00
  -6  -4 -20  140.89    9.70
   4 -10  20  132.19    9.40
 -10   6  20  130.59    7.80
   6   4  20  119.99    9.20
 -10   6  20  142.89   10.60
  -6  -1 -20  176.68   11.00
  -6  -1 -20  189.38   11.70
  -1   7 -20  189.98   11.50
  -1   7 -20  176.18   11.10
   7  -6 -20  202.68   10.70
  -7   6  20  179.58   10.50
   1  -7  20  182.38   11.60
   6   1  20  206.08   11.10
  -7   6  20  161.98   12.10
   1  -7  20  193.88   11.30
   4  -6 -20  898.11   43.60
  -6   2 -20  831.32   44.60
   2   4 -20  843.82   42.80
   4  -6 -20  853.61   45.10
  -4   6  20  860.11   44.60
  -4   6  20  832.92   43.20
  -2  -4  20  755.42   43.50
  -2  -4  20  852.81   42.90
   6  -2  20  843.12   43.90
  -2  -4  20  794.82   43.90
   1  -6 -20    5.50    2.00
   1  -6 -20    5.80    1.60
  -1   6  20    6.50    1.60
  -5  -1  20    7.40    2.20
  -1   6  20    5.40    2.00
   6  -5  20    7.10    1.80
  -6   8 -20  106.39    6.40
  -2  -6 -20  107.29    7.80
   6  -8  20  115.29    7.80
  -8   2  20  102.29    8.30
   6  -8  20   97.19    6.40
   2   6  20  109.99    8.10
  -6  11 -20   16.20    2.80
  -5  -6 -20   16.40    3.50
   6 -11  20   16.70    3.40
 -11   5  20   16.80    3.90
   5   6  20   18.40    3.80
 -11   5  20   15.30    1.80
  -5  12 -20   53.19    5.20
   7   5  20   44.00    6.70
  -7  -2 -20   90.19    6.70
   9  -7 -20   75.59    5.40
  -2   9 -20   78.89    6.30
  -9   7  20   81.89    7.40
  -9   7  20   72.69    5.40
   2  -9  20   79.39    6.30
   7   2  20   91.39    6.30
  -7   1 -20  194.28   11.80
  -7   1 -20  191.58   10.40
   1   6 -20  183.38   10.90
  -7   1 -20  176.88   10.50
   6  -7 -20  200.28   11.20
   1   6 -20  171.88   11.50
  -1  -6  20  190.28   11.00
  -6   7  20  199.78   12.70
   3  -7 -20  125.49    8.40
   4   3 -20  122.29    7.00
  -3   7  20  119.79    9.00
   7  -4  20  120.49    8.40
  -3   7  20  121.39    8.20
  -4  -3  20  127.29    7.10
  -4  -3  20  157.78    9.10
   0  -7 -20   91.09    7.00
   7  -7  20   88.69    6.80
   0   7  20   89.99    7.40
  -7   0  20   92.99    7.30
  -3  -7 -20   42.70    5.40
  -7  10 -20   48.80    3.80
 -10   3  20   42.00    5.90
   7 -10  20   40.00    5.10
   3   7  20   55.69    6.70
   7 -10  20   40.40    3.70
  -3  11 -20   49.00    5.20
  -8  -3 -20   61.19    6.70
  11  -8 -20   52.39    4.20
   3 -11  20   48.70    5.80
 -11   8  20   46.60    6.70
   8   3  20   56.79    5.30
  -8   0 -20   43.50    3.80
   8  -8 -20   44.20    3.90
   0   8 -20   38.80    4.80
  -8   0 -20   38.70    4.80
  -8   0 -20   47.80    3.70
  -8   8  20   48.60    6.40
  -8   8  20   40.80    3.70
  -8   3 -20  149.79    8.30
  -8   3 -20  152.48    8.30
   3   5 -20  148.69    9.00
   5  -8 -20  158.98   10.00
   8  -3  20  171.58   10.50
  -3  -5  20  167.78    9.30
  -5   8  20  166.58   11.20
  -3  -5  20  161.78   10.30
   2  -8 -20  118.69    8.20
   8  -6  20  125.89    8.30
  -6  -2  20  121.69    8.50
  -2   8  20   91.79    8.30
  -1  -8 -20   63.39    5.90
  -8   9 -20   59.89    4.00
   8  -9  20   60.69    3.90
  -9   1  20   76.49    6.70
   8  -9  20   59.39    5.60
   1   8  20   75.89    6.60
  10  -9 -20  117.29    8.10
  -9  -1 -20  126.39    8.80
  -9  -1 -20  116.29    9.00
  -1  10 -20  122.89    9.10
   1 -10  20  118.89    8.80
 -10   9  20  113.69    9.80
   7  -9 -20   83.19    6.20
   2   7 -20   79.09    6.10
  -9   2 -20   81.59    5.70
  -9   2 -20   73.49    5.10
   2   7 -20   79.89    6.60
  -9   2 -20   82.59    6.50
  -2  -7  20   76.59    5.70
  -7   9  20   70.59    7.00
   4  -9 -20   73.59    5.90
  -5  -4  20   71.19    4.70
   9  -5  20   72.19    6.00
  -4   9  20   69.49    6.60
  -5  -4  20   61.39    4.40
  -5  -4  20   71.79    6.10
   1  -9 -20   62.59    6.20
   9  -8  20   71.19    6.20
  -1   9  20   69.49    6.90
  -8  -1  20   88.59    7.10
   2   9  20   59.19    7.70
 -10  -2 -20    3.60    1.70
  12 -10 -20    4.60    2.90
   9 -10 -20  102.19    8.00
 -10   1 -20  121.19    7.70
 -10   1 -20  116.09    9.20
   1   9 -20  115.09    9.00
  -1  -9  20  123.39    8.40
  -9  10  20  104.39    9.50
   4   6 -20  109.29    7.90
   6 -10 -20  144.39    9.50
  -4  -6  20  141.29    9.70
  -6  10  20  141.19   10.60
  10  -4  20  138.89    9.60
  -4  -6  20  136.09    8.40
   3 -10 -20   49.99    5.90
  -7  -3  20   45.60    3.00
  -3  10  20   34.00    5.40
  -7  -3  20   46.10    5.90
  -7  -3  20   44.00    2.90
  10  -7  20   61.69    6.40
   0 -10 -20    2.60    3.00
   0  10  20    1.60    1.70
  10 -10  20   -1.60    1.10
 -10   0  20    3.20    2.40
  11 -11 -20   12.70    2.80
   0 -11  20    8.30    2.60
 -11   3 -20   49.20    4.20
   8 -11 -20   48.10    5.80
   3   8 -20   47.90    6.40
 -11   3 -20   49.80    5.90
  -3  -8  20   64.79    6.00
  -8  11  20   56.19    7.50
  -3  -8  20   53.49    4.80
   5 -11 -20   12.80    3.90
  11  -6  20   16.10    3.40
  -5  11  20   19.40    4.20
  -6  -5  20   18.00    3.90
  -6  -5  20   17.70    2.40
  10 -12 -20    0.80    1.30
  -2 -10  20    1.30    1.40
   7 -12 -20   59.79    6.60
  -5  -7  20   55.29    4.80
   0   0 -21    1.10    0.60
   0   0 -21    1.70    0.60
   0   0 -21    2.00    0.70
   0   0  21    1.90    0.80
   2  -1 -21   63.19    4.50
  -1   2 -21   66.59    4.30
  -1  -1 -21   68.69    4.50
   2  -1 -21   62.19    3.80
  -1  -1 -21   63.39    4.40
   2  -1 -21   64.09    3.80
  -1  -1 -21   66.89    4.30
   1  -2  21   68.89    4.10
   1  -2  21   66.79    4.10
   1  -2  21   65.49    4.30
  -2   1  21   65.09    4.80
   1   1  21   62.59    4.30
  -2   1 -21   63.39    4.40
   1  -2 -21   71.59    4.70
   1  -2 -21   67.19    4.20
   1  -2 -21   75.19    4.30
  -2   1 -21   62.09    3.70
   1   1 -21   64.19    3.80
   1   1 -21   60.39    4.20
   2  -1  21   62.29    3.80
   2  -1  21   60.29    4.40
  -1  -1  21   61.59    3.80
  -1  -1  21   67.59    4.50
  -1   2  21   70.89    5.20
  -2  -2 -21   35.60    3.20
   4  -2 -21   36.90    2.10
  -2  -2 -21   36.80    3.10
   4  -2 -21   36.40    3.30
  -2   4 -21   34.30    3.00
  -2  -2 -21   39.60    3.30
   2  -4  21   35.70    2.70
   2  -4  21   38.70    3.10
   2   2  21   41.70    3.30
   2  -4  21   38.10    2.60
  -4   2  21   33.20    3.90
   3  -3 -21    0.30    0.80
   3  -3 -21   -0.60    0.30
  -3   0 -21    0.80    0.70
   0   3 -21    0.50    0.50
  -3   0 -21    0.30    0.40
  -3   0 -21    0.20    0.60
   3   0  21   -0.20    0.30
  -3   3  21   -0.30    0.90
   0  -3  21    0.30    0.60
   0  -3  21    1.20    0.70
  -3   3  21    0.20    0.40
   0  -3  21    0.40    0.40
  -3   3 -21   -0.80    0.30
   0  -3 -21   -0.20    0.60
   3   0 -21   -0.70    0.50
   0  -3 -21    0.70    0.70
   3  -3  21    0.20    0.60
   0   3  21    0.40    0.70
  -3   0  21   -0.50    0.60
   0   3  21    0.20    0.60
  -3   6 -21   18.90    2.80
  -3   6 -21   19.60    2.30
  -3  -3 -21   17.60    2.70
  -3  -3 -21   16.10    2.70
   3  -6  21   18.10    2.70
  -6   3  21   13.70    2.80
   3  -6  21   22.70    2.60
   3   3  21   17.50    2.70
   5  -4 -21    3.70    0.90
  -4  -1 -21    1.20    0.90
  -4  -1 -21    2.90    1.00
   5  -4 -21    2.90    1.20
  -4  -1 -21    1.80    1.00
  -1   5 -21    1.70    1.00
  -1   5 -21    2.60    1.00
  -5   4  21    0.70    1.40
   1  -5  21    1.00    0.80
   1  -5  21    1.90    1.00
  -5   4  21    2.60    0.70
   1  -5  21    4.00    1.20
   4   1  21    1.80    0.90
   2  -4 -21   41.00    3.60
   2  -4 -21   33.70    2.90
  -4   2 -21   35.10    3.20
   2   2 -21   33.60    2.20
  -2  -2  21   34.50    2.30
  -2  -2  21   34.70    3.10
  -2   4  21   38.50    3.60
  -2   4  21   38.90    2.90
  -2  -2  21   32.30    3.10
   4  -2  21   31.00    3.00
  -1  -4 -21  169.38   10.50
  -4   5 -21  165.78   10.20
  -1  -4 -21  180.98   10.40
   5  -1 -21  157.28   10.20
   4  -5  21  177.28    8.90
   4  -5  21  170.68   10.30
   1   4  21  167.78   10.20
   1   4  21  165.18   10.50
   4  -5  21  173.28    9.00
  -5   1  21  161.88   10.60
  -4  -4 -21  246.48   15.10
   8  -4 -21  254.27   12.90
  -4   8 -21  249.08   14.20
  -8   4  21  244.18   12.90
  -8   4  21  253.17   15.90
   4  -8  21  232.78   14.30
   4   4  21  283.97   15.30
   4  -8  21  251.67   15.00
   7  -5 -21   17.30    1.90
  -2   7 -21   16.20    2.40
  -5  -2 -21   14.00    2.60
  -2   7 -21   11.80    2.30
  -5  -2 -21   12.80    2.40
  -7   5  21   13.20    1.70
   2  -7  21   12.10    2.30
  -7   5  21   12.20    3.00
   2  -7  21   15.10    2.60
   5   2  21   13.60    2.30
  -5   1 -21    2.50    0.70
   4  -5 -21    1.80    0.90
   4  -5 -21    2.90    1.40
  -5   1 -21    3.30    1.30
   1   4 -21    1.30    0.70
  -4   5  21    0.50    1.20
  -4   5  21    1.70    0.70
  -1  -4  21    0.60    0.90
  -1  -4  21    2.50    0.80
   5  -1  21    4.70    1.50
  -1  -4  21    3.30    1.30
  -5   4 -21  165.78   10.70
   1  -5 -21  179.88   11.00
   1  -5 -21  179.58   10.60
  -1   5  21  200.28   11.40
  -4  -1  21  183.08   10.90
   5  -4  21  171.28   10.60
  -4  -1  21  160.58   10.80
  -2  -5 -21   78.89    6.40
  -5   7 -21   73.59    4.60
   5  -7  21   71.59    5.80
   2   5  21   75.59    6.00
  -7   2  21   65.19    6.10
   5  -7  21   73.59    4.70
  -5  -5 -21    2.90    1.70
  -5  10 -21    3.20    1.40
 -10   5  21    3.30    0.70
   5 -10  21    2.20    1.30
 -10   5  21   -0.80    1.60
   5 -10  21    1.40    1.30
   5   5  21    4.40    2.00
   9  -6 -21    0.30    0.80
  -3   9 -21    0.20    0.90
  -6  -3 -21    0.70    1.20
  -9   6  21    1.00    0.60
   6   3  21    0.90    1.20
  -9   6  21    1.20    1.80
   3  -9  21    0.60    1.10
   6  -6 -21   -0.60    0.60
  -6   0 -21    1.20    1.00
   0   6 -21   -0.70    0.60
  -6   0 -21    0.10    0.60
   0   6 -21    0.70    0.80
  -6   6  21    0.80    1.30
  -6   6  21   -0.40    0.50
   6   0  21   -0.30    0.60
   0  -6  21    0.80    0.80
   0  -6  21   -0.10    0.70
   3  -6 -21   17.70    3.50
   3  -6 -21   19.00    2.60
   3   3 -21   15.90    1.40
  -3  -3  21   19.80    3.10
  -3  -3  21   17.00    1.50
  -3   6  21   13.30    2.70
   6  -3  21   18.90    2.90
  -3  -3  21   18.60    3.00
  -3   6  21   18.90    3.30
   0  -6 -21   -0.50    0.70
   0   6  21   -1.00    0.80
  -6   0  21    0.40    1.20
   6  -6  21    0.10    0.80
  -6   9 -21   25.40    2.50
  -3  -6 -21   30.50    4.50
  -9   3  21   26.30    4.50
   6  -9  21   20.40    3.40
   6  -9  21   21.00    2.70
   3   6  21   21.90    4.00
  -6  12 -21    9.40    2.30
   6   6  21    8.60    2.60
  -7  -4 -21    4.40    2.10
  -4  11 -21    2.90    1.70
  11  -7 -21    6.70    1.40
 -11   7  21    6.90    2.70
   4 -11  21    4.40    2.10
   7   4  21    4.90    2.00
   8  -7 -21   73.39    5.00
  -7  -1 -21   70.19    5.80
  -7  -1 -21   60.59    5.20
  -1   8 -21   78.39    6.00
  -8   7  21   66.89    6.50
  -8   7  21   67.19    4.90
   7   1  21   77.59    5.40
   5  -7 -21   12.90    2.20
  -7   2 -21   12.20    1.30
   2   5 -21   17.20    2.20
  -7   2 -21   15.30    1.30
  -2  -5  21   11.00    1.80
  -2  -5  21   11.30    2.20
  -5   7  21   13.90    2.10
  -5   7  21   13.60    2.90
   7  -2  21   14.70    2.70
   2  -7 -21   77.29    6.00
   7  -5  21   79.49    6.10
  -7   8 -21    4.70    0.80
  -1  -7 -21    4.80    1.80
   7  -8  21    4.30    0.80
   1   7  21    2.10    1.70
   7  -8  21    6.20    1.90
  -8   1  21    7.10    2.40
  -4  -7 -21   33.20    5.00
  -7  11 -21   32.60    3.30
   7 -11  21   31.30    4.60
   4   7  21   26.70    5.10
 -11   4  21   31.60    5.60
  -5  13 -21    0.00    1.40
  -8  -2 -21    0.30    2.20
  10  -8 -21    1.30    1.00
  -2  10 -21    1.90    1.40
  -8  -2 -21    1.90    1.30
 -10   8  21    1.50    1.30
   2 -10  21   -0.50    1.30
 -10   8  21    1.90    2.50
   8   2  21    0.40    1.10
   1   7 -21   67.99    5.80
   1   7 -21   71.09    5.20
  -8   1 -21   72.29    6.00
  -8   1 -21   74.49    6.00
   7  -8 -21   70.59    5.30
  -8   1 -21   68.69    4.80
  -1  -7  21   66.49    5.20
  -7   8  21   64.89    6.40
   4   4 -21  240.08   13.80
   4  -8 -21  262.67   15.30
  -4  -4  21  249.78   13.90
   8  -4  21  260.07   15.50
  -4   8  21  257.17   16.30
  -4  -4  21  299.97   15.90
   1  -8 -21    4.70    1.80
  -1   8  21    2.30    1.70
  -7  -1  21    5.90    2.20
   8  -7  21    4.00    1.70
  -2  -8 -21    4.90    2.20
   8 -10  21   14.30    3.00
 -10   2  21   15.90    5.00
   2   8  21   11.70    3.30
  -3  12 -21    1.30    1.60
  -9  -3 -21    0.80    1.50
  -9   0 -21    0.60    1.00
  -9   0 -21    0.30    1.00
   9  -9 -21    0.20    1.30
  -9   0 -21    2.90    1.50
   0   9 -21    1.40    1.40
   0  -9  21   -1.80    0.80
  -9   9  21    3.70    2.20
   6  -9 -21    0.10    1.10
  -9   3 -21    0.50    0.50
  -9   3 -21    0.60    0.50
   3   6 -21    0.70    0.80
  -3  -6  21    0.20    1.20
   9  -3  21   -0.30    1.00
  -6   9  21   -0.60    1.30
  -3  -6  21    1.50    0.90
   3  -9 -21   34.70    4.50
  -6  -3  21   22.00    1.70
   9  -6  21   21.40    3.60
  -6  -3  21   23.30    1.70
  -6  -3  21   25.30    4.10
  -3   9  21   17.50    3.70
   0  -9 -21   -0.10    1.70
  -9   0  21    2.40    3.00
   0   9  21   -1.50    1.30
 -10  -1 -21    6.10    1.90
  -1  11 -21    3.30    1.90
  11 -10 -21    5.20    1.70
   1 -11  21    6.10    2.30
 -10   2 -21    2.20    1.10
   2   8 -21    3.80    2.10
   8 -10 -21   -0.80    1.00
 -10   2 -21    2.20    1.90
  -8  10  21   -2.10    2.40
  -2  -8  21    1.60    1.70
  -2  -8  21    2.20    1.30
   5   5 -21    3.30    1.10
   5 -10 -21    0.40    1.00
  -5  10  21    2.00    1.80
  -5  -5  21    2.30    1.90
  10  -5  21    7.50    2.40
  -5  -5  21    3.00    1.10
  10  -8  21   12.40    3.20
  -2  10  21   13.90    4.30
  -8  -2  21   16.60    3.50
  10 -11 -21    3.30    1.60
  -1 -10  21    2.90    1.80
   7 -11 -21    7.70    2.30
  11  -4  21   -0.30    1.30
  -4  -7  21    6.00    2.30
  -7  11  21    6.00    2.80
  -4  -7  21    5.80    1.70
   4 -11 -21   26.00    4.10
  -4  11  21   22.00    4.40
  -7  -4  21   31.40    4.90
  11  -7  21   34.80    4.90
   9 -12 -21    1.00    1.60
  -3  -9  21    1.20    1.20
   6 -12 -21   17.50    5.50
   0   1 -22 1461.35   87.89
  -1   0 -22 1360.36   84.89
   1  -1 -22 1391.06   86.79
   0   1 -22 1322.07   84.09
  -1   0 -22 1345.87   85.79
   1  -1 -22 1486.45   87.89
   1   0  22 1462.95   88.59
   0  -1  22 1347.47   86.99
  -1   1  22 1281.07   87.99
   1   0  22 1374.26   86.19
   0  -1  22 1277.47   85.69
  -1   1  22 1462.65   87.69
   3  -2 -22    2.60    0.60
  -1   3 -22    3.60    1.00
   3  -2 -22    4.70    1.40
   3  -2 -22    3.20    0.70
  -3   2  22    3.90    1.40
   1  -3  22    3.30    0.90
   1  -3  22    3.20    0.90
   1  -3  22    3.00    0.90
  -2   2 -22 1371.06   69.39
   2   0 -22 1354.26   69.39
   5  -3 -22  461.05   26.80
  -3  -2 -22  485.85   26.40
  -3  -2 -22  484.35   26.80
  -2   5 -22  480.75   26.40
   5  -3 -22  501.45   25.30
  -3  -2 -22  493.35   26.80
  -5   3  22  522.35   25.30
   2  -5  22  499.65   25.90
   3   2  22  525.35   26.50
   2  -5  22  513.65   26.50
  -5   3  22  453.15   27.20
   2  -5  22  532.85   26.30
   1   2 -22    1.00    0.50
   2  -3 -22    4.60    1.50
   2  -3 -22    3.00    0.90
  -1  -2  22    4.60    1.30
  -2   3  22    5.00    1.00
  -1  -2  22    2.80    1.00
  -2   3  22    1.70    1.00
  -1  -2  22    1.90    0.60
  -3   4 -22  843.62   43.70
  -1  -3 -22  839.62   43.70
   4  -1 -22  801.22   43.70
  -1  -3 -22  810.22   43.70
  -1  -3 -22  881.51   43.80
   3  -4  22  825.72   42.50
  -4   1  22  825.52   44.10
   3  -4  22  844.32   43.60
   1   3  22  883.31   44.00
   3  -4  22  860.21   42.50
   7  -4 -22  134.29    7.50
  -3   7 -22  142.09    8.60
  -4  -3 -22  141.89    9.30
   3  -7  22  140.39    8.70
  -7   4  22  134.19    7.50
   4   3  22  134.09    9.00
   3  -7  22  155.58    9.20
  -7   4  22  160.68   10.30
   4  -4 -22   24.00    3.20
  -4   0 -22   28.50    2.20
  -4   0 -22   29.40    3.30
   4  -4 -22   29.00    2.30
  -4   0 -22   31.80    3.70
   0   4 -22   22.90    2.20
   0  -4  22   24.00    2.90
   0  -4  22   28.30    3.00
  -4   4  22   22.80    2.10
  -4   4  22   34.70    4.30
   4   0  22   24.50    2.10
   0  -4  22   26.80    2.50
   1  -4 -22  860.81   44.00
   1  -4 -22  867.61   43.60
  -4   3 -22  825.12   43.70
  -1   4  22  835.22   43.40
  -1   4  22  816.72   44.00
  -3  -1  22  853.11   43.90
   4  -3  22  849.12   43.70
  -3  -1  22  811.82   43.90
  -4   6 -22  270.27   16.10
  -4   6 -22  289.07   15.00
  -2  -4 -22  271.87   17.20
  -2  -4 -22  314.67   16.50
   4  -6  22  281.87   16.10
   2   4  22  267.07   16.40
   4  -6  22  288.07   15.10
  -6   2  22  286.47   16.80
   4  -6  22  279.87   14.90
  -5  -4 -22   15.00    3.00
  -4   9 -22   20.00    2.80
   9  -5 -22   18.50    1.50
  -9   5  22   16.20    1.50
   4  -9  22   18.40    3.00
  -9   5  22   24.40    4.30
   4  -9  22   15.90    3.00
   6  -5 -22  218.38   11.90
  -1   6 -22  218.88   12.70
  -1   6 -22  203.88   13.10
  -5  -1 -22  238.48   13.30
  -5  -1 -22  212.48   12.40
   1  -6  22  216.78   12.60
   1  -6  22  202.28   12.80
  -6   5  22  235.98   14.00
   5   1  22  227.28   12.40
  -6   5  22  209.28   11.80
   2   3 -22  517.55   26.10
   3  -5 -22  507.75   26.80
  -5   2 -22  492.15   27.30
   3  -5 -22  473.95   27.50
  -3   5  22  501.65   26.60
  -2  -3  22  518.05   27.20
   5  -2  22  497.55   27.30
  -3   5  22  528.15   27.90
  -2  -3  22  493.15   27.30
  -2  -3  22  531.65   26.10
  -5   5 -22  132.79    8.40
   0  -5 -22  115.69    8.30
   0  -5 -22  135.79    8.40
  -5   0  22  123.49    8.60
  -5   0  22  117.19    8.90
   0   5  22  127.29    8.70
   5  -5  22  134.29    8.30
   0   5  22  126.79    8.10
  -3  -5 -22   90.09    6.80
   3   5  22   75.79    6.60
   5  -8  22   87.99    5.70
   5  -8  22   87.09    6.60
  -8   3  22   86.39    7.40
  -5  11 -22   47.70    4.70
  -6  -5 -22   58.29    6.70
   5 -11  22   47.80    5.80
 -11   6  22   46.90    6.60
   6   5  22   66.89    5.80
  -6  -2 -22    4.30    1.70
  -2   8 -22    4.30    1.60
  -6  -2 -22    4.80    1.60
   8  -6 -22    4.90    1.10
  -8   6  22    5.80    1.20
   2  -8  22    6.70    1.90
  -8   6  22    4.00    2.20
   6   2  22    4.20    1.50
   2  -8  22    4.50    1.90
  -6   1 -22  204.48   11.30
  -6   1 -22  215.38   11.50
  -6   1 -22  220.18   13.00
   5  -6 -22  214.78   12.20
   1   5 -22  214.28   12.00
  -5   6  22  205.78   12.00
  -1  -5  22  219.78   12.10
  -5   6  22  218.48   13.60
   6  -1  22  220.48   13.00
  -1  -5  22  215.48   12.60
  -1  -5  22  213.18   12.90
   2  -6 -22  273.37   16.00
  -2   6  22  289.47   16.90
   6  -4  22  292.57   16.40
  -2   6  22  278.97   15.90
  -4  -2  22  281.07   16.40
  -1  -6 -22  222.28   14.30
   6  -7  22  234.78   14.30
  -7   1  22  248.38   15.00
   1   6  22  249.88   15.60
  -4  -6 -22   39.10    5.30
  -6  10 -22   28.20    3.40
   6 -10  22   27.70    4.00
 -10   4  22   30.10    5.10
   6 -10  22   28.90    4.40
   4   6  22   27.60    4.40
  10  -7 -22  129.79    7.40
  -7  -3 -22  116.49    9.00
  -3  10 -22  122.29    8.60
 -10   7  22  101.99    7.40
 -10   7  22  116.59    9.80
   7   3  22  124.59    8.60
   3 -10  22  133.29    9.00
   7  -7 -22    7.40    1.60
   0   7 -22    8.90    2.20
  -7   0 -22    7.50    1.90
  -7   0 -22    6.40    1.40
  -7   0 -22    4.20    1.20
   0   7 -22    5.20    1.40
  -7   7  22    4.30    1.20
  -7   7  22    5.30    2.10
   0  -7  22    5.90    1.60
   4  -7 -22  144.39    9.00
   3   4 -22  142.69    8.00
  -3  -4  22  139.69    8.00
   7  -3  22  154.18    9.60
  -4   7  22  131.59    8.70
  -3  -4  22  142.19    9.30
  -4   7  22  134.79   10.10
   1  -7 -22  239.18   14.60
  -1   7  22  253.87   15.30
   7  -6  22  243.18   14.60
  -6  -1  22  238.58   14.90
  -7   9 -22  214.08   11.50
  -2  -7 -22  210.38   13.50
  -9   2  22  196.88   14.00
   2   7  22  204.78   13.70
   7  -9  22  210.08   13.40
  -7  12 -22    3.30    1.90
   5   7  22    2.80    2.20
  -4  12 -22   38.50    5.30
   8   4  22   56.49    7.80
  -1   9 -22   48.60    4.80
  -8  -1 -22   40.70    3.80
  -8  -1 -22   54.79    5.90
  -8  -1 -22   40.10    4.10
   9  -8 -22   51.39    4.00
  -9   8  22   37.50    3.60
  -9   8  22   43.60    6.00
   1  -9  22   52.79    4.70
  -8   2 -22    2.60    1.40
  -8   2 -22    5.10    1.00
   6  -8 -22    2.40    1.30
   2   6 -22    4.60    1.30
  -8   2 -22    5.30    1.00
   8  -2  22    8.30    2.20
  -6   8  22    3.20    2.10
  -2  -6  22    4.70    1.70
  -2  -6  22    2.10    1.10
   3  -8 -22   91.99    6.70
   8  -5  22   82.69    6.60
  -3   8  22  101.49    7.60
  -5  -3  22   80.69    4.80
  -5  -3  22   83.39    4.80
  -5  -3  22   81.29    6.70
   0  -8 -22  235.98   14.50
   8  -8  22  219.28   14.20
   0   8  22  233.28   15.00
  -8   0  22  219.58   14.70
 -11   3  22   33.30    5.90
   3   8  22   49.80    6.60
  -2  11 -22   23.10    4.40
  -9  -2 -22   16.20    2.90
   2 -11  22   14.00    3.10
   8  -9 -22   49.00    4.50
   1   8 -22   44.60    5.70
  -9   1 -22   46.60    3.80
  -9   1 -22   54.89    6.10
  -9   1 -22   50.59    4.00
  -8   9  22   51.19    6.90
  -1  -8  22   52.19    4.60
   5  -9 -22   15.70    2.80
   4   5 -22   17.60    2.10
   9  -4  22   16.10    3.00
  -4  -5  22   18.50    3.20
  -5   9  22   16.20    3.70
  -4  -5  22   16.70    2.20
   2  -9 -22  222.48   13.80
  -7  -2  22  204.88   13.80
   9  -7  22  211.38   13.60
  -2   9  22  215.48   14.40
  -1  -9 -22    1.40    1.70
   1   9  22    2.60    1.90
 -10   1  22    6.60    2.90
   9 -10  22    2.50    1.90
 -10   0 -22   47.10    6.40
   0  10 -22   45.80    5.90
 -10   0 -22   39.20    3.90
  10 -10 -22   47.40    5.10
   0 -10  22   36.80    4.90
 -10   3 -22  128.19    9.30
   7 -10 -22  141.89    9.10
 -10   3 -22  115.09    6.90
  -3  -7  22  126.39    9.20
  10  -3  22  122.69    9.10
  -3  -7  22  119.39    8.00
  -7  10  22  127.39   12.00
   4 -10 -22   25.60    4.10
  -6  -4  22   31.80    4.50
  -4  10  22   22.30    4.50
  10  -6  22   34.50    4.90
  -6  -4  22   30.90    2.30
   1 -10 -22    3.50    1.90
  -1  10  22    4.30    2.50
  -9  -1  22    0.90    2.00
  10  -9  22    3.60    1.90
   2   9 -22   17.30    4.00
   9 -11 -22   17.20    3.20
  -2  -9  22   23.60    4.00
  -2  -9  22   16.60    3.00
   6 -11 -22   50.39    5.80
  -5  -6  22   56.59    4.30
  11  -5  22   64.69    6.90
  -5  -6  22   50.29    6.10
  -6  11  22   52.29    7.20
   3 -11 -22   37.90    5.30
  11  -8  22   48.60    7.50
  11 -12 -22    9.50    3.10
   8 -12 -22   44.60    5.70
  -4  -8  22   40.80    4.70
   0  -1 -23    1.10    0.70
   0  -1 -23    0.90    0.70
   1   0 -23    1.00    0.50
   1   0 -23    0.50    0.50
   1   0 -23    0.40    0.60
  -1   1 -23    1.80    0.70
   0  -1 -23    1.00    0.60
  -1   1 -23    1.10    0.60
   1  -1  23    1.70    0.70
  -1   0  23    0.30    0.80
   1  -1  23   -0.10    0.70
   0   1  23    1.20    0.90
  -2   0 -23    0.90    0.70
   2  -2 -23   -0.20    0.30
   2  -2 -23    0.60    0.50
  -2   0 -23    0.00    0.50
  -2   0 -23   -0.30    0.40
   2  -2 -23    1.80    0.90
   2   0  23    0.40    0.50
  -2   2  23    0.80    1.00
   0  -2  23    0.70    0.60
   0  -2  23    0.40    0.50
   0  -2  23    1.20    0.60
  -1  -2 -23   28.60    3.20
   3  -1 -23   22.20    2.80
  -1  -2 -23   26.40    2.60
  -1  -2 -23   26.70    2.90
   3  -1 -23   27.90    1.70
  -2   3 -23   29.90    2.60
   3  -1 -23   26.90    1.60
   2  -3  23   29.60    2.10
  -3   1  23   27.40    3.50
   1   2  23   32.10    2.90
   2  -3  23   28.40    2.10
   2  -3  23   30.90    2.60
   4  -3 -23   84.29    5.10
  -3  -1 -23   93.29    6.20
  -1   4 -23   90.59    5.70
  -3  -1 -23   87.29    5.60
  -3  -1 -23   98.59    6.80
   4  -3 -23   78.69    6.60
   1  -4  23   84.39    5.70
  -4   3  23   87.09    5.10
   1  -4  23   87.99    5.60
  -4   3  23   97.39    6.80
   3   1  23   92.69    5.70
   1  -4  23   91.29    5.70
   1  -3 -23   30.50    2.60
   2   1 -23   25.70    1.80
  -3   2 -23   31.40    2.80
   1  -3 -23   30.60    3.50
   3  -2  23   27.30    3.00
  -2  -1  23   26.40    3.20
  -1   3  23   30.50    3.00
  -2  -1  23   26.80    1.80
  -1   3  23   29.90    2.50
  -2  -1  23   27.30    2.70
  -2  -3 -23   80.09    5.60
  -2  -3 -23   80.69    5.70
  -2  -3 -23   74.39    5.50
  -5   2  23   73.59    6.10
   3  -5  23   69.59    4.60
   3  -5  23   80.09    5.50
   2   3  23   79.89    5.70
   3  -5  23   77.19    4.60
  -4  -2 -23   27.80    2.80
  -2   6 -23   27.30    3.30
  -2   6 -23   32.50    2.80
   6  -4 -23   26.30    2.00
  -4  -2 -23   35.50    4.20
   2  -6  23   39.90    4.00
   4   2  23   25.00    3.10
   2  -6  23   25.20    3.20
  -6   4  23   19.20    3.50
  -6   4  23   27.00    2.00
   2  -6  23   26.80    2.60
   3  -4 -23   95.79    6.00
   1   3 -23   87.09    5.50
  -4   1 -23   99.09    5.00
  -4   1 -23   86.69    6.20
  -1  -3  23   92.49    5.40
  -3   4  23   91.89    5.60
  -1  -3  23   96.49    6.10
   4  -1  23   88.19    4.90
  -3   4  23   77.19    6.40
  -1  -3  23   80.69    6.00
   4  -1  23   87.89    6.20
   0  -4 -23    0.50    0.70
   0  -4 -23    1.40    1.00
  -4   4 -23    0.80    0.80
   4   0 -23    0.40    0.70
   0   4  23    1.70    1.10
   4  -4  23    0.00    0.70
  -4   0  23    1.10    0.90
   0   4  23    0.70    0.80
  -4   0  23    0.90    1.10
  -3  -4 -23    1.90    1.30
  -3  -4 -23    0.50    1.00
  -4   7 -23    0.50    0.70
   3   4  23    2.30    1.30
   4  -7  23   -1.10    0.80
   4  -7  23    1.50    0.80
  -7   3  23    1.20    1.50
  -5  -3 -23    5.20    1.70
   8  -5 -23    9.40    1.20
  -5  -3 -23    6.60    2.00
  -3   8 -23    3.60    1.40
  -8   5  23    8.40    1.20
  -8   5  23    9.50    2.90
   3  -8  23    5.20    1.60
   5   3  23    8.20    2.00
   0   5 -23    0.00    0.70
  -5   0 -23   -0.20    0.80
  -5   0 -23    0.30    0.60
   0  -5  23   -0.70    0.70
   0  -5  23    0.80    0.80
  -5   5  23   -1.00    1.00
   5   0  23    1.50    0.70
  -5   5  23    0.10    0.50
   0  -5  23    0.50    0.90
  -5   3 -23   82.09    5.80
   2  -5 -23   76.49    6.00
   3   2 -23   77.89    4.20
   2  -5 -23   65.99    5.30
  -3  -2  23   81.89    5.90
  -3  -2  23   82.49    4.30
   5  -3  23   77.89    5.70
  -2   5  23   79.09    5.30
  -2   5  23   77.09    6.20
  -3  -2  23   74.49    5.80
  -1  -5 -23  166.38   11.10
  -1  -5 -23  185.48   11.10
   5  -6  23  174.18   10.90
  -6   1  23  168.58   11.40
   1   5  23  187.58   11.40
  -4  -5 -23   35.20    4.80
  -5   9 -23   39.20    3.30
  -9   4  23   33.80    5.10
   4   5  23   33.00    4.50
   5  -9  23   37.40    4.70
   5  -9  23   34.00    3.30
  10  -6 -23    3.00    0.80
  -4  10 -23    3.00    1.50
  -6  -4 -23    3.30    1.90
   6   4  23    4.10    2.00
   4 -10  23    6.60    2.10
 -10   6  23    2.80    1.10
 -10   6  23    6.00    2.60
  -1   7 -23   59.99    4.90
  -6  -1 -23   69.29    5.50
  -1   7 -23   64.59    5.10
   7  -6 -23   60.89    4.30
  -6  -1 -23   63.99    4.80
   1  -7  23   62.39    5.20
  -7   6  23   59.19    5.90
  -7   6  23   67.09    4.40
   6   1  23   59.99    4.60
   1  -7  23   66.19    5.00
   4  -6 -23   28.60    3.40
   2   4 -23   26.60    2.30
  -4   6  23   29.60    3.20
  -2  -4  23   27.90    2.40
  -2  -4  23   35.20    3.50
   6  -2  23   26.30    3.50
  -4   6  23   25.70    4.00
  -2  -4  23   27.20    3.50
   1  -6 -23  182.28   11.00
  -1   6  23  179.48   11.50
  -5  -1  23  182.58   11.40
   6  -5  23  159.78   10.80
  -6   8 -23    8.80    1.30
  -2  -6 -23    2.40    1.60
  -8   2  23   11.00    2.90
   6  -8  23    5.30    1.90
   2   6  23    5.70    2.10
   6  -8  23    8.10    1.30
  -6  11 -23   38.00    3.70
  -5  -6 -23   33.90    5.20
   6 -11  23   33.10    4.90
 -11   5  23   45.20    6.70
   5   6  23   40.20    5.40
  -5  12 -23    5.10    2.00
   7   5  23    4.00    2.00
  -2   9 -23   82.29    6.30
   9  -7 -23   70.39    5.10
  -7  -2 -23   75.79    6.40
  -9   7  23   77.39    7.40
   2  -9  23   83.89    6.30
   7   2  23   79.19    6.00
  -9   7  23   72.29    5.10
  -7   1 -23   66.49    4.00
  -7   1 -23   65.19    4.20
   6  -7 -23   68.19    4.90
  -7   1 -23   70.99    5.60
   1   6 -23   57.39    4.50
  -1  -6  23   69.59    5.30
  -6   7  23   57.29    4.60
  -6   7  23   45.60    6.10
  -1  -6  23   61.09    4.60
   3  -7 -23    0.10    0.90
   4   3 -23    1.10    0.40
  -4  -3  23    1.20    0.50
  -3   7  23    1.90    1.60
   7  -4  23    1.20    1.20
   0  -7 -23    0.70    1.10
   0   7  23    1.50    1.40
  -7   0  23    3.40    1.90
   7  -7  23   -0.20    1.00
  -3  -7 -23    4.50    2.00
  -7  10 -23    4.40    1.20
   3   7  23    4.00    2.40
   7 -10  23    5.50    1.60
  -3  11 -23   13.80    3.10
  11  -8 -23   15.20    2.20
   8   3  23   14.50    3.00
 -11   8  23   17.00    5.80
   3 -11  23   15.60    3.20
  -8   0 -23    0.00    0.80
  -8   0 -23    0.70    0.80
   8  -8 -23    0.40    0.90
   0   8 -23    0.10    0.90
  -8   0 -23    1.90    1.50
  -8   8  23    0.30    1.40
   0  -8  23    0.90    1.20
  -8   8  23   -1.00    0.60
   3   5 -23    8.30    1.50
   5  -8 -23    5.90    1.80
   8  -3  23    6.40    2.10
  -5   8  23    9.60    2.80
  -3  -5  23    7.30    2.10
  -3  -5  23    9.00    1.60
   2  -8 -23    9.40    2.40
   8  -6  23    6.10    2.00
  -2   8  23    5.40    2.20
  -6  -2  23    9.40    2.60
  -1  -8 -23   18.60    3.60
   8  -9  23   18.80    3.50
   1   8  23   26.90    4.40
  -9   1  23   24.70    4.50
  -9  -1 -23   -0.30    1.00
  -9  -1 -23   -0.10    1.30
  -1  10 -23   -0.40    1.40
   1 -10  23    0.90    1.40
 -10   9  23   -0.40    1.70
   2   7 -23   76.09    5.50
  -9   2 -23   74.59    4.70
  -9   2 -23   68.89    6.30
  -9   2 -23   80.89    4.90
   7  -9 -23   92.59    6.40
  -2  -7  23   68.09    6.20
  -2  -7  23   66.39    5.40
  -7   9  23   84.59    7.60
   4  -9 -23   36.10    4.60
  -4   9  23   37.80    5.30
  -5  -4  23   34.90    2.60
  -5  -4  23   41.70    5.10
   9  -5  23   31.40    4.30
   1  -9 -23   23.90    4.00
  -8  -1  23   27.90    4.40
  -1   9  23   19.80    4.00
   9  -8  23   29.50    4.30
 -10   1 -23    0.40    0.90
   9 -10 -23   -0.60    1.00
 -10   1 -23    1.90    1.80
  -9  10  23    1.60    1.90
  -1  -9  23    0.60    1.20
   4   6 -23    3.70    1.20
   6 -10 -23    4.10    1.70
  -4  -6  23    2.70    1.60
  -4  -6  23    2.20    1.00
  10  -4  23    3.50    1.70
  -6  10  23    2.20    2.20
   3 -10 -23    8.10    2.50
  10  -7  23    3.90    2.30
  -7  -3  23    6.90    2.70
  -3  10  23    6.50    3.10
  11 -11 -23    1.20    1.40
   0 -11  23    4.00    3.20
   8 -11 -23   10.50    2.60
 -11   3 -23   16.00    3.90
  -3  -8  23   14.10    3.30
  -3  -8  23   18.40    3.00
   5 -11 -23   42.50    5.40
  -6  -5  23   36.00    3.40
  11  -6  23   37.80    5.00
  -5  11  23   32.70    5.60
  -6  -5  23   44.50    5.80
  10 -12 -23    2.90    1.80
  -2 -10  23    1.90    1.60
   7 -12 -23    1.00    2.70
   0   0 -24 4467.85  235.08
   0   0 -24 4459.45  233.38
   0   0  24 4170.48  235.98
   0   0  24 4046.80  233.68
  -1   2 -24  425.16   22.80
  -1  -1 -24  431.16   22.80
  -1  -1 -24  438.26   23.00
   2  -1 -24  437.26   22.20
   2  -1 -24  410.46   22.20
   2  -1 -24  422.76   23.10
  -1  -1 -24  440.66   23.00
   1   1  24  458.05   23.00
  -2   1  24  420.86   23.30
   1  -2  24  448.56   22.60
   1  -2  24  434.16   23.20
   1  -2  24  420.66   22.50
   1  -2 -24  427.26   22.40
  -2   1 -24  443.46   22.80
   1  -2 -24  429.66   22.40
   1   1 -24  394.06   22.40
  -2   1 -24  431.76   21.90
   1   1 -24  422.56   22.00
   1  -2 -24  429.26   22.90
   2  -1  24  437.26   22.80
  -1  -1  24  411.06   23.20
  -1   2  24  432.66   23.10
  -1  -1  24  415.46   22.00
   2  -1  24  436.96   22.00
  -2  -2 -24  392.86   21.50
   4  -2 -24  400.56   21.90
  -2   4 -24  393.86   21.40
  -2  -2 -24  423.26   21.80
   2  -4  24  399.76   20.90
   2  -4  24  404.36   21.50
  -4   2  24  423.36   22.40
   2  -4  24  400.56   20.80
   2   2  24  358.06   21.40
   0   3 -24    5.10    1.10
  -3   0 -24    7.70    1.70
   3  -3 -24    6.60    1.60
  -3   0 -24    7.70    1.20
   3  -3 -24    8.00    1.30
  -3   0 -24    6.70    1.50
   0  -3  24    9.50    1.40
   0  -3  24    5.70    1.40
   3   0  24    7.30    1.20
   0  -3  24    8.40    1.70
  -3   3  24    8.30    1.30
  -3   3  24    4.20    1.60
  -3   3 -24  169.18   10.50
   0  -3 -24  178.38   10.70
   0  -3 -24  182.28   10.50
   3   0 -24  172.18   10.50
   0  -3 -24  175.38   10.40
   3  -3  24  175.08   10.50
  -3   0  24  203.28   11.10
   0   3  24  181.18   10.80
  -3  -3 -24  872.11   44.50
  -3   6 -24  829.82   44.10
  -3  -3 -24  836.62   44.10
   3   3  24  842.42   44.20
  -6   3  24  789.82   44.90
   3  -6  24  843.72   43.40
   3  -6  24  842.92   44.10
   3  -6  24  880.21   43.20
  -1   5 -24 1048.50   55.09
   5  -4 -24 1148.59   54.49
  -4  -1 -24 1067.29   55.69
  -4  -1 -24 1035.60   54.89
   1  -5  24 1085.09   54.99
  -5   4  24 1094.79   56.39
   4   1  24 1092.79   54.89
   1  -5  24 1056.79   55.09
  -5   4  24 1045.80   54.29
   1  -5  24 1050.99   55.29
   2  -4 -24  406.16   21.30
  -4   2 -24  380.26   21.70
   2  -4 -24  405.66   22.00
   2   2 -24  399.66   20.40
  -2  -2  24  393.66   21.60
  -2   4  24  387.76   21.20
  -2  -2  24  410.56   20.50
  -2   4  24  386.36   22.10
   4  -2  24  406.16   21.80
  -2  -2  24  399.16   21.80
   5  -1 -24  210.88   13.90
  -4   5 -24  226.18   13.20
  -1  -4 -24  213.68   13.80
  -1  -4 -24  229.08   13.20
  -1  -4 -24  230.78   13.30
   1   4  24  214.38   13.00
  -5   1  24  235.78   13.80
   1   4  24  226.58   13.40
   4  -5  24  233.18   13.20
  -4  -4 -24   27.90    4.10
  -4   8 -24   27.60    2.70
   4  -8  24   23.50    3.50
   4  -8  24   28.60    3.30
   4   4  24   26.10    3.80
  -8   4  24   28.20    4.40
  -5  -2 -24  270.97   16.40
   7  -5 -24  273.57   14.80
  -2   7 -24  288.07   15.90
  -5  -2 -24  268.37   15.90
   2  -7  24  276.97   16.00
   5   2  24  300.47   15.90
   2  -7  24  283.47   16.10
  -7   5  24  269.27   17.10
  -5   1 -24 1083.29   54.19
   4  -5 -24 1107.59   55.09
   1   4 -24 1104.09   54.79
  -1  -4  24 1121.49   54.89
  -1  -4  24 1113.79   55.59
  -4   5  24 1031.40   56.39
  -4   5  24 1056.19   54.89
   5  -1  24 1049.00   55.79
  -1  -4  24  999.70   55.59
   1  -5 -24  224.48   13.70
  -5   4 -24  224.88   13.50
   1  -5 -24  233.68   13.30
   5  -4  24  247.48   13.60
  -1   5  24  229.78   13.10
  -4  -1  24  211.68   13.60
  -4  -1  24  233.78   13.70
  -1   5  24  221.88   13.90
  -2  -5 -24   94.59    7.20
  -7   2  24   98.89    7.80
   5  -7  24   99.89    7.10
   5  -7  24  101.09    5.50
   2   5  24   97.39    7.30
   5  -7  24   92.79    5.70
  -5  10 -24   33.90    3.80
   5 -10  24   27.00    4.00
   5   5  24   28.30    4.30
   5 -10  24   23.60    3.50
 -10   5  24   28.30    5.70
  -3   9 -24  111.79    7.90
  -6  -3 -24  127.49    8.80
   9  -6 -24  114.29    6.60
   3  -9  24  118.89    8.30
   6   3  24  113.39    8.00
  -9   6  24  111.79    6.70
  -9   6  24  114.49    9.40
  -6   0 -24  370.56   21.30
   6  -6 -24  381.96   20.30
   0   6 -24  378.16   20.50
  -6   0 -24  370.76   20.10
  -6   6  24  376.56   20.10
   0  -6  24  400.26   20.90
  -6   6  24  347.17   21.90
   0  -6  24  397.56   20.60
   6   0  24  356.86   19.90
   0  -6  24  382.16   21.20
   3  -6 -24  888.91   44.40
   3   3 -24  839.22   42.90
  -3   6  24  858.21   45.40
   6  -3  24  845.12   44.70
  -3   6  24  813.92   44.00
  -3  -3  24  874.81   44.70
  -3  -3  24  826.02   43.00
   0  -6 -24   31.80    4.40
  -6   0  24   27.00    3.90
   6  -6  24   27.40    3.70
   0   6  24   30.80    4.30
  -3  -6 -24  102.59    8.20
   3   6  24  111.19    8.50
  -9   3  24  104.09    9.00
   6  -9  24  112.89    8.10
   6  -9  24  107.69    6.70
  -6  12 -24    8.30    2.50
   6   6  24    6.40    2.60
  -7  -4 -24   95.59   12.90
  -4  11 -24   86.29    6.90
 -11   7  24   90.29   10.40
   4 -11  24   78.49    7.20
   7   4  24   91.79    7.20
   8  -7 -24  173.38    9.80
  -7  -1 -24  150.68   10.10
  -7  -1 -24  164.18   10.90
   1  -8  24  167.48   10.50
   7   1  24  169.48   10.10
  -8   7  24  178.58   12.20
  -8   7  24  159.18    9.60
   2   5 -24  281.17   15.70
   5  -7 -24  300.27   16.50
  -5   7  24  310.97   18.00
  -2  -5  24  273.27   15.80
  -2  -5  24  311.67   16.90
   7  -2  24  295.67   17.10
  -5   7  24  273.87   16.20
   2  -7 -24  100.99    8.60
   7  -5  24   92.69    7.30
  -2   7  24  100.49    8.00
  -5  -2  24  118.39    8.00
  -1  -7 -24  161.78   11.00
   7  -8  24  161.58   10.80
  -8   1  24  147.29   11.30
   1   7  24  180.08   11.60
  -7  11 -24   58.69    4.60
   4   7  24   60.79    6.30
   7 -11  24   60.79    7.60
 -11   4  24   63.19    9.30
  -8  -2 -24  127.49    9.70
  10  -8 -24  122.19    8.10
  -2  10 -24  139.39    9.60
   2 -10  24  134.19    9.50
 -10   8  24  147.29   11.10
   8   2  24  136.59    9.10
  -8   1 -24  161.98    9.60
   1   7 -24  168.38   10.20
  -8   1 -24  151.98    9.40
   7  -8 -24  182.98   10.50
  -8   1 -24  169.68   11.20
  -1  -7  24  183.48   11.10
  -7   8  24  179.58   12.20
  -1  -7  24  164.58   10.30
   4   4 -24   26.20    2.10
   4  -8 -24   31.80    4.10
   8  -4  24   21.80    3.60
  -4   8  24   29.80    4.70
  -4  -4  24   30.30    4.30
  -4  -4  24   23.80    2.00
   1  -8 -24  178.28   11.40
   8  -7  24  177.68   11.30
  -1   8  24  145.99   11.50
  -7  -1  24  175.78   11.80
  -2  -8 -24  101.69    8.50
 -10   2  24  109.49    9.20
   8 -10  24  100.79    8.20
  -9  -3 -24    0.50    1.30
  -3  12 -24    1.20    1.50
  -9   0 -24  104.99    7.90
  -9   0 -24   96.39    6.40
   0   9 -24   90.19    7.60
   0  -9  24   99.19    7.30
  -9   9  24   88.49    8.50
   3   6 -24  112.19    7.30
   6  -9 -24  120.19    8.30
  -6   9  24  127.79    9.80
  -3  -6  24  113.19    8.50
   9  -3  24  138.69    9.10
  -3  -6  24  116.49    7.50
   3  -9 -24  107.09    8.30
   9  -6  24  111.99    8.50
  -6  -3  24  115.99    8.80
  -3   9  24  127.79    9.70
   0  -9 -24    9.30    2.70
   0   9  24   17.50    4.50
   9  -9  24   14.90    3.10
  -9   0  24    7.80    2.80
  11 -10 -24    1.90    1.30
  -1  11 -24    2.00    1.80
   1 -11  24    2.90    1.90
 -10   2 -24  111.99    7.20
 -10   2 -24  135.59    9.50
   8 -10 -24  122.49    8.60
  -2  -8  24  108.19    9.20
  -8  10  24  148.99   10.90
  -2  -8  24  131.19    8.40
   5 -10 -24   23.80    3.80
  -5  -5  24   26.90    2.40
  10  -5  24   34.70    7.10
  -5  -5  24   37.60    5.20
   2 -10 -24   97.39    8.30
  10  -8  24  113.39    8.60
  -8  -2  24  104.69    8.80
  -2  10  24  107.59    9.30
  10 -11 -24    2.90    1.70
 -11   4 -24   69.69    8.30
   7 -11 -24   75.89    6.70
  -4  -7  24   82.19    7.20
  -4  -7  24   77.69    5.70
  11  -4  24   89.09    7.40
   4 -11 -24   54.09    6.30
   9 -12 -24    2.00    1.70
   0   1 -25    5.80    1.10
   0   1 -25    3.80    0.90
   1  -1 -25    3.10    1.00
   1  -1 -25    4.40    1.20
   1  -1 -25    4.50    1.00
  -1   0 -25    1.30    0.70
   0  -1  25    7.00    1.30
  -1   1  25    5.00    1.50
   0  -1  25    4.70    1.00
  -2  -1 -25   56.09    4.20
   3  -2 -25   54.49    3.30
   3  -2 -25   47.40    4.10
   3  -2 -25   49.80    3.20
  -1   3 -25   52.09    3.80
  -2  -1 -25   50.19    3.70
  -2  -1 -25   48.00    4.00
  -3   2  25   58.19    4.70
   2   1  25   56.59    3.90
   1  -3  25   52.79    3.80
   1  -3  25   54.09    3.90
   1  -3  25   52.29    3.70
   2   0 -25    0.70    0.30
   0  -2 -25    1.60    1.00
   2   0 -25    0.30    0.50
   2   0 -25    0.40    0.30
  -2   2 -25    0.70    0.70
   0  -2 -25    0.40    0.60
   0  -2 -25    0.60    0.60
   2  -2  25   -0.40    0.30
   2  -2  25   -0.50    0.40
   0   2  25    0.50    0.90
   2  -2  25    0.30    0.60
  -2   0  25   -0.10    0.80
  -3  -2 -25  143.89    9.40
  -3  -2 -25  148.89    9.10
  -2   5 -25  151.68    9.20
   5  -3 -25  153.78    7.80
  -3  -2 -25  141.09   10.10
   5  -3 -25  150.48    7.80
   2  -5  25  150.88    9.20
   2  -5  25  160.28    8.90
  -5   3  25  130.09    9.80
   3   2  25  157.28    9.20
   2  -5  25  149.39    8.60
  -3   1 -25   51.49    3.10
   2  -3 -25   55.79    4.40
  -3   1 -25   59.59    4.30
   2  -3 -25   53.09    3.70
   1   2 -25   53.09    3.40
   2  -3 -25   49.90    3.70
  -2   3  25   56.89    4.60
  -1  -2  25   49.40    4.00
   3  -1  25   51.29    3.20
   3  -1  25   48.10    4.00
  -1  -2  25   56.09    3.40
  -1  -2  25   51.19    4.00
   4  -1 -25   30.60    3.20
  -1  -3 -25   33.20    3.60
  -1  -3 -25   32.50    3.20
  -1  -3 -25   33.60    3.20
  -3   4 -25   34.80    3.80
   3  -4  25   34.50    2.30
  -4   1  25   39.10    3.80
   3  -4  25   34.60    3.80
   1   3  25   37.70    3.40
   3  -4  25   35.40    2.30
  -4  -3 -25   32.20    4.10
  -4  -3 -25   28.00    3.70
   3  -7  25   28.00    2.80
   4   3  25   30.20    3.70
  -7   4  25   21.60    4.10
   3  -7  25   23.00    3.40
   3  -7  25   29.30    2.60
   0   4 -25   -0.60    0.40
  -4   0 -25    0.20    0.50
   4  -4 -25   -0.70    0.80
  -4   0 -25   -0.20    0.60
   4  -4 -25    0.10    0.50
  -4   0 -25   -1.30    0.40
   0  -4  25   -0.50    0.70
  -4   4  25   -0.40    1.20
  -4   4  25    0.00    0.40
   4   0  25   -0.60    0.40
   0  -4  25    0.20    0.60
   0  -4  25   -0.20    0.50
   1  -4 -25   35.00    3.10
   1  -4 -25   35.00    3.50
  -4   3 -25   30.00    3.50
  -1   4  25   23.20    3.40
  -1   4  25   33.30    3.00
   4  -3  25   35.50    3.20
  -3  -1  25   37.60    3.50
  -2  -4 -25  154.28    9.80
  -2  -4 -25  165.58   10.00
   2   4  25  143.99    9.80
  -6   2  25  143.89   11.00
   4  -6  25  146.09    8.40
   4  -6  25  160.58    9.70
   4  -6  25  152.78    8.30
  -4   9 -25    0.40    0.80
  -5  -4 -25    1.80    1.50
  -9   5  25   -1.90    1.20
   4  -9  25    3.10    1.30
   5   4  25    0.60    1.10
   4  -9  25    2.60    1.60
  -1   6 -25   59.89    4.40
   6  -5 -25   58.29    3.80
  -5  -1 -25   52.39    4.70
  -5  -1 -25   53.89    4.10
   1  -6  25   47.40    4.20
   5   1  25   54.89    4.10
  -6   5  25   50.39    5.30
   1  -6  25   57.79    4.70
  -6   5  25   56.29    3.70
   1  -6  25   53.49    4.20
   3  -5 -25  162.18   10.00
   2   3 -25  138.09    8.20
   3  -5 -25  157.28    9.10
  -3   5  25  153.78    9.00
  -2  -3  25  152.08    8.30
  -2  -3  25  154.08    9.60
  -3   5  25  155.68   10.20
  -2  -3  25  148.49    9.40
   5  -2  25  141.99    9.50
   0  -5 -25    0.70    1.00
   0  -5 -25    0.60    0.90
   5  -5  25    0.60    1.00
   0   5  25    1.40    1.20
  -5   0  25    0.90    1.30
  -5   8 -25    1.50    0.70
  -3  -5 -25    0.60    1.10
   5  -8  25   -0.90    0.60
   5  -8  25    1.90    0.80
  -8   3  25    1.70    1.90
  -5  11 -25    3.40    1.60
 -11   6  25    7.80    4.60
   5 -11  25    9.40    2.50
   6   5  25    8.50    2.60
  -6  -2 -25   53.59    5.30
  -6  -2 -25   57.49    4.90
  -2   8 -25   60.09    5.00
   8  -6 -25   69.29    4.20
  -8   6  25   62.49    6.30
  -8   6  25   64.09    4.10
   6   2  25   55.09    4.70
   2  -8  25   66.19    5.30
  -6   1 -25   52.19    3.20
  -6   1 -25   56.19    3.40
   5  -6 -25   55.39    4.20
   1   5 -25   52.89    3.90
  -6   1 -25   56.09    4.80
  -5   6  25   50.69    3.90
  -1  -5  25   47.60    4.60
  -1  -5  25   62.39    4.70
  -5   6  25   53.19    5.30
  -1  -5  25   53.49    4.00
   2  -6 -25  146.99    9.60
  -2   6  25  151.48    9.40
  -2   6  25  160.48   10.50
   6  -4  25  152.88   10.00
  -4  -2  25  152.08   10.00
  -1  -6 -25    0.40    1.00
   6  -7  25    1.00    1.10
  -7   1  25    0.20    1.20
   1   6  25   -0.10    1.20
  -6  10 -25   17.30    2.50
  -4  -6 -25   12.40    3.00
 -10   4  25   18.70    4.20
   4   6  25   20.50    3.90
   6 -10  25   21.30    4.70
  10  -7 -25    1.40    0.80
  -3  10 -25    0.30    1.20
  -7  -3 -25    1.40    1.60
 -10   7  25    1.50    1.90
   3 -10  25    0.30    1.30
   7   3  25   -0.70    1.10
   7  -7 -25   -0.40    0.50
  -7   0 -25    0.50    0.60
  -7   0 -25    1.00    1.10
  -7   0 -25   -0.30    0.60
   0   7 -25   -0.30    0.70
  -7   7  25    0.30    0.70
  -7   7  25    0.00    1.20
   0  -7  25    0.00    0.80
   0  -7  25    0.30    1.10
   4  -7 -25   21.80    3.00
  -4   7  25   22.30    3.30
  -4   7  25   19.70    3.60
  -3  -4  25   25.90    2.10
   7  -3  25   26.60    3.80
   1  -7 -25    1.40    1.40
   7  -6  25   -1.30    0.60
  -1   7  25    0.10    1.20
  -6  -1  25   -0.80    1.00
  -2  -7 -25   55.79    6.40
   7  -9  25   62.29    6.60
   2   7  25   54.79    6.70
  -9   2  25   53.19    6.90
  -4  12 -25    5.80    2.20
  -8  -1 -25   34.30    4.10
  -8  -1 -25   37.90    3.40
  -1   9 -25   33.10    4.50
   9  -8 -25   36.20    3.80
  -9   8  25   32.40    3.50
   1  -9  25   35.60    4.60
  -8   2 -25   79.79    6.10
   2   6 -25   56.89    4.50
   6  -8 -25   60.59    5.00
   8  -2  25   58.29    5.50
  -2  -6  25   67.89    4.80
  -2  -6  25   63.29    5.50
  -6   8  25   75.89    6.80
   3  -8 -25    3.20    1.60
  -5  -3  25    2.00    1.50
   8  -5  25   -0.20    1.00
  -3   8  25    0.10    1.50
   0  -8 -25    0.10    1.20
  -8   0  25    1.90    1.80
   0   8  25   -0.70    1.40
   8  -8  25   -0.90    0.90
   3   8  25    6.80    2.80
  -2  11 -25    0.40    1.50
  -9  -2 -25    3.00    1.40
   2 -11  25    2.00    1.70
   8  -9 -25   36.90    4.20
  -9   1 -25   33.30    3.30
  -9   1 -25   45.90    8.10
  -1  -8  25   33.20    4.00
  -1  -8  25   30.20    4.30
   4   5 -25    0.50    0.60
   5  -9 -25    0.70    0.90
  -5   9  25   -0.20    1.40
  -4  -5  25   -0.90    1.10
   9  -4  25    0.50    1.20
  -4  -5  25   -0.10    0.50
   2  -9 -25   43.70    5.50
  -2   9  25   58.39    7.30
   9  -7  25   54.59    6.10
  -7  -2  25   48.00    5.90
   1   9  25    9.20    3.00
   0  10 -25   -0.40    1.10
  10 -10 -25    0.60    1.10
   0 -10  25    0.80    1.20
   0 -10  25   -0.90    1.00
   7 -10 -25    3.20    1.70
 -10   3 -25    3.50    1.80
  -3  -7  25    1.40    1.10
  -7  10  25    3.50    2.30
  -3  -7  25    2.20    1.70
   4 -10 -25   11.70    2.80
  10  -6  25   10.80    2.60
  -4  10  25   16.30    3.90
  -6  -4  25   14.80    3.80
   1 -10 -25   22.50    6.10
  -1  10  25    7.40    3.10
   9 -11 -25    2.60    1.70
  -2  -9  25    0.60    1.20
   6 -11 -25    4.40    2.20
  -5  -6  25    4.80    2.40
   0   2 -26  352.66   19.00
   2  -2 -26  353.96   18.90
  -2   0 -26  369.36   19.60
  -2   0 -26  383.86   19.70
   2  -2 -26  335.57   19.60
  -2   0 -26  375.16   19.00
   2   0  26  372.36   19.10
   0  -2  26  344.77   19.30
   0  -2  26  358.46   19.00
   0  -2  26  355.36   19.30
  -2   2  26  358.86   20.00
  -1  -2 -26  197.98   11.10
  -1  -2 -26  191.98   11.20
   3  -1 -26  185.88    9.90
  -2   3 -26  178.48   11.00
  -1  -2 -26  212.78   11.30
   3  -1 -26  197.08   11.30
   3  -1 -26  183.78    9.90
   2  -3  26  171.08   10.90
   1   2  26  212.98   11.40
  -3   1  26  207.78   11.80
   2  -3  26  182.48   10.30
   2  -3  26  189.08   10.40
   4  -3 -26  501.85   25.20
  -1   4 -26  488.55   26.00
   4  -3 -26  519.45   25.30
  -3  -1 -26  502.85   26.60
  -3  -1 -26  505.15   26.60
  -3  -1 -26  485.95   25.80
   4  -3 -26  458.35   26.50
   1  -4  26  506.35   26.30
   1  -4  26  485.75   26.00
   3   1  26  459.15   25.80
   1  -4  26  507.35   26.00
  -4   3  26  466.95   26.90
   2   1 -26  190.38    9.80
   1  -3 -26  184.98   10.70
   2   1 -26  183.38    9.80
   1  -3 -26  183.58   10.70
   1  -3 -26  186.18   11.10
  -3   2 -26  193.58   11.00
  -1   3  26  203.78   11.40
   3  -2  26  189.08   11.00
  -2  -1  26  168.88   10.90
  -2  -1  26  177.88   11.00
  -3   5 -26 1088.89   57.69
  -2  -3 -26 1097.09   57.79
  -2  -3 -26 1099.39   57.69
   2   3  26 1138.09   57.79
   3  -5  26 1127.29   57.69
   3  -5  26 1086.29   56.49
   3  -5  26 1082.39   56.59
  -5   2  26 1223.08   58.69
  -2   6 -26  351.16   19.70
  -4  -2 -26  358.16   19.60
  -4  -2 -26  368.56   20.30
   6  -4 -26  354.36   18.30
   2  -6  26  337.27   19.40
  -6   4  26  345.47   18.30
  -6   4  26  378.96   21.10
   2  -6  26  355.86   19.10
   2  -6  26  352.26   19.70
   4   2  26  372.66   19.70
   3  -4 -26  461.05   26.20
  -4   1 -26  486.35   26.10
   1   3 -26  478.35   25.00
  -4   1 -26  480.55   24.40
   3  -4 -26  525.15   25.40
  -1  -3  26  486.55   25.00
  -3   4  26  474.05   25.20
  -3   4  26  455.75   26.40
   4  -1  26  470.85   26.00
   4  -1  26  461.35   24.30
  -1  -3  26  477.75   25.90
  -1  -3  26  509.55   25.80
  -4   4 -26  397.86   22.30
   4   0 -26  385.16   22.20
   0  -4 -26  413.36   22.30
   0  -4 -26  407.16   22.20
  -4   0  26  399.06   22.70
  -4   0  26  394.96   22.60
   4  -4  26  412.16   22.30
   0   4  26  468.45   23.00
   0   4  26  389.66   22.10
  -3  -4 -26  188.68   11.90
  -3  -4 -26  193.28   12.10
  -7   3  26  183.68   12.60
   4  -7  26  196.28   10.50
   4  -7  26  180.38   11.70
   3   4  26  205.18   12.00
   4  -7  26  181.28   10.70
  -5  -3 -26   16.20    2.90
   8  -5 -26   11.90    1.00
  -5  -3 -26   18.50    3.20
  -3   8 -26   14.60    2.40
  -8   5  26   13.70    1.20
   3  -8  26   15.00    2.30
  -8   5  26   11.30    3.10
   3  -8  26   13.70    2.70
   5   3  26   17.40    2.80
  -5   0 -26  106.09    7.30
   0   5 -26   99.09    6.40
   5  -5 -26  105.79    6.70
  -5   0 -26   95.79    6.00
   0  -5  26   99.49    6.90
   5   0  26   98.49    5.90
   0  -5  26  100.39    6.40
   0  -5  26  104.59    6.70
  -5   5  26   95.09    6.00
  -5   5  26   97.19    7.70
   2  -5 -26 1117.19   56.19
   2  -5 -26 1062.89   56.69
  -3  -2  26 1051.79   56.59
  -3  -2  26 1077.99   56.49
  -2   5  26 1074.59   56.99
   5  -3  26 1137.99   56.49
  -1  -5 -26  285.67   17.20
   1   5  26  282.67   17.10
  -6   1  26  302.47   17.60
  -5   9 -26   42.40    3.50
  -4  -5 -26   39.10    5.10
   5  -9  26   43.90    3.60
   5  -9  26   49.99    5.60
  -9   4  26   34.80    5.40
   4   5  26   47.70    5.60
  -6  -4 -26  114.29    8.70
  -4  10 -26  107.49    7.60
 -10   6  26  109.09    9.40
   6   4  26  102.99    8.00
   4 -10  26  110.99    8.30
   7  -6 -26    2.00    0.80
  -6  -1 -26    1.30    0.80
  -6  -1 -26    1.20    1.00
   6   1  26    2.30    1.00
  -7   6  26   -0.10    1.40
  -7   6  26    0.90    0.60
   1  -7  26    2.30    1.20
   1  -7  26    1.10    1.00
   1  -7  26    1.80    1.10
   2   4 -26  354.76   19.00
   4  -6 -26  350.26   19.80
  -2  -4  26  373.76   19.10
  -2  -4  26  388.06   20.40
  -4   6  26  348.67   20.20
   6  -2  26  354.56   20.50
   1  -6 -26  308.87   18.10
  -1   6  26  359.06   19.10
   6  -5  26  285.97   18.00
  -5  -1  26  313.37   18.50
  -2  -6 -26  136.39   10.30
  -8   2  26  155.08   11.20
   6  -8  26  170.98   10.60
   2   6  26  158.08   10.80
  -6  11 -26   71.29    5.50
   6 -11  26   75.69    7.10
   5   6  26   74.79    6.80
  -5  12 -26   38.30    6.40
   7   5  26   31.40    4.90
  -2   9 -26  159.78   10.60
   9  -7 -26  161.78    9.30
  -7  -2 -26  171.48   11.20
  -9   7  26  158.28   12.00
   7   2  26  162.18   10.30
   2  -9  26  166.88   10.80
  -9   7  26  158.38    9.30
  -7   1 -26    1.10    0.50
   6  -7 -26    0.90    0.90
  -7   1 -26    0.90    1.00
  -7   1 -26    1.60    0.60
   1   6 -26    1.20    0.90
  -6   7  26    2.10    1.60
  -1  -6  26    1.80    0.90
  -1  -6  26    1.90    1.30
  -6   7  26    1.70    0.90
   3  -7 -26  192.48   12.00
  -4  -3  26  201.08   12.40
  -3   7  26  191.68   12.90
   7  -4  26  191.78   12.20
   0  -7 -26   89.89    7.60
  -7   0  26  115.69    8.50
   7  -7  26  102.19    7.70
   0   7  26  112.39    8.50
  -3  -7 -26  244.68   15.30
   7 -10  26  219.58   12.20
 -10   3  26  232.18   15.90
   7 -10  26  218.58   14.60
   3   7  26  246.48   15.40
  -3  11 -26   93.19    7.40
   8   3  26   84.99    7.10
   3 -11  26  103.49    7.90
  -8   0 -26   92.89    7.10
   8  -8 -26   84.69    5.90
  -8   0 -26   79.29    5.40
  -8   0 -26   74.39    5.50
  -8   8  26   72.99    5.60
   0  -8  26   91.49    6.70
   0  -8  26   81.99    6.20
   5  -8 -26   10.40    2.40
   3   5 -26   19.40    2.10
  -3  -5  26   17.30    3.20
   8  -3  26   18.20    3.20
  -3  -5  26   14.70    2.00
  -5   8  26   11.20    2.80
   2  -8 -26  168.88   11.10
  -2   8  26  179.08   12.10
  -6  -2  26  158.78   11.40
   8  -6  26  164.58   11.10
  -1  -8 -26  100.09    8.70
  -9   1  26  114.59    9.10
   1   8  26  109.29    8.80
   8  -9  26   92.69    8.30
  -9  -1 -26   38.40    3.80
  -1  10 -26   44.00    5.40
  10  -9 -26   39.60    3.70
   1 -10  26   42.30    5.20
   1 -10  26   51.69    4.90
  -9   2 -26  171.38   11.50
   2   7 -26  146.79    9.80
   7  -9 -26  180.38   10.80
  -2  -7  26  165.48   10.20
  -7   9  26  179.78   12.60
  -2  -7  26  164.38   11.10
   4  -9 -26   52.09    5.50
   9  -5  26   47.70    5.40
  -5  -4  26   45.70    5.70
  -5  -4  26   39.80    2.60
  -4   9  26   47.80    6.00
  -5  -4  26   40.50    2.60
   1  -9 -26  150.08   12.90
  -1   9  26  104.49   10.70
   9  -8  26  107.59    8.60
  -8  -1  26  114.29    9.30
   9 -10 -26   50.39    4.50
  -1  -9  26   40.30    5.40
  -1  -9  26   38.70    4.80
   6 -10 -26  114.29    8.40
  -4  -6  26  117.19    7.10
  10  -4  26  109.99    8.70
  -6  10  26  108.59    9.60
   3 -10 -26  204.98   17.80
  -7  -3  26  216.18   15.10
  10  -7  26  246.98   15.10
  -3  10  26  243.68   16.00
   8 -11 -26   87.29    7.30
  -3  -8  26   97.99    6.80
   5 -11 -26   74.19    6.70
   0   0 -27    1.50    0.70
   0   0 -27    1.40    0.70
   0   0 -27    0.70    0.60
   0   0  27    0.90    0.80
  -1  -1 -27    2.90    1.00
  -1  -1 -27    3.90    1.20
  -1  -1 -27    4.10    1.10
  -1   2 -27    4.30    1.10
   2  -1 -27    5.80    1.00
   2  -1 -27    5.00    1.40
   2  -1 -27    3.50    0.80
   1  -2  27    5.20    1.20
   1  -2  27    3.90    1.10
   1  -2  27    3.10    1.00
  -2   1  27    6.50    1.90
   1   1  27    4.10    1.30
   1  -2 -27    7.20    1.60
   1   1 -27    3.70    1.10
   1  -2 -27    4.80    1.30
  -2   1 -27    3.80    0.80
   1  -2 -27    3.80    1.00
   1   1 -27    3.30    0.80
  -2   1 -27    5.90    1.40
  -1  -1  27    3.90    0.90
  -1  -1  27    4.10    1.20
   2  -1  27    5.30    1.40
   2  -1  27    6.00    1.10
  -1   2  27    4.90    1.50
  -2  -2 -27   10.70    1.90
   4  -2 -27    8.80    1.90
  -2   4 -27   13.60    2.10
  -2  -2 -27   13.20    2.40
  -2  -2 -27    9.20    2.00
   2   2  27   10.60    2.00
   2  -4  27   11.20    1.60
   2  -4  27    9.70    1.50
  -4   2  27    9.90    2.30
   2  -4  27   13.60    2.20
  -3   0 -27    0.30    0.60
  -3   0 -27   -1.10    0.60
  -3   0 -27    0.30    0.50
   3  -3 -27    0.60    0.50
   3  -3 -27    0.60    0.90
   3  -3 -27    0.50    0.50
   0   3 -27    0.90    0.70
   0  -3  27   -0.40    0.60
   0  -3  27    0.70    0.80
   3   0  27   -0.50    0.40
  -3   3  27   -0.70    1.10
   0  -3 -27    0.20    0.70
  -3   3 -27   -0.50    0.60
   0  -3 -27    1.00    0.70
   0  -3 -27    0.20    0.80
   3  -3  27    1.10    0.80
   0   3  27    0.90    1.00
  -3   0  27    0.70    1.00
  -3  -3 -27    0.50    0.90
  -3  -3 -27    1.70    1.00
   3  -6  27    0.10    0.60
  -6   3  27   -0.60    1.50
   3  -6  27    0.50    0.80
   3  -6  27    0.70    0.70
   3   3  27    1.40    1.20
   5  -4 -27  206.18   10.70
  -4  -1 -27  192.38   11.20
  -1   5 -27  200.08   11.50
  -4  -1 -27  214.28   12.20
  -5   4  27  221.08   13.00
   1  -5  27  189.28   11.50
   1  -5  27  188.78   11.40
   4   1  27  194.28   11.20
   1  -5  27  195.18   11.30
  -5   4  27  183.98   10.60
   2   2 -27   10.60    1.20
   2  -4 -27   13.70    2.10
  -4   2 -27   11.60    2.10
   2  -4 -27    9.90    2.10
  -2  -2  27   10.90    2.20
  -2   4  27    8.50    1.60
   4  -2  27   10.70    2.00
  -2  -2  27    8.70    2.00
  -2  -2  27    9.60    1.20
  -2   4  27    9.90    2.30
  -1  -4 -27  147.49    9.80
  -1  -4 -27  168.08    9.90
   4  -5  27  149.19    9.60
   1   4  27  150.28    9.90
  -5   1  27  154.28   10.30
  -4  -4 -27   21.70    3.60
   4  -8  27   17.10    2.50
  -8   4  27   18.20    3.80
   4  -8  27   19.60    3.10
   4   4  27   19.50    3.30
   4  -8  27   17.70    2.30
   7  -5 -27   51.69    3.10
  -5  -2 -27   58.19    4.90
  -5  -2 -27   46.40    4.10
  -7   5  27   50.69    3.20
   2  -7  27   46.20    4.20
   2  -7  27   49.70    3.90
   5   2  27   39.10    3.80
   2  -7  27   45.40    4.30
  -7   5  27   47.00    5.90
   4  -5 -27  197.38   11.10
  -5   1 -27  205.68   12.00
   1   4 -27  198.48   10.80
  -4   5  27  191.48   12.50
  -4   5  27  194.58   11.00
  -1  -4  27  196.58   11.60
  -1  -4  27  162.28   11.50
   5  -1  27  208.38   12.00
   1  -5 -27  137.39   11.10
   1  -5 -27  157.28    9.70
  -1   5  27  140.59    9.30
   5  -4  27  159.98    9.80
  -4  -1  27  176.88   10.30
  -1   5  27  146.09   10.10
  -2  -5 -27   11.70    2.60
   5  -7  27   12.00    1.10
   2   5  27    8.30    2.40
   5  -7  27   13.20    1.20
  -7   2  27   15.40    3.20
   5  -7  27   11.60    2.40
  -5  -5 -27    1.50    1.60
  -5  10 -27    3.80    1.40
   5   5  27    2.30    1.60
   5 -10  27   -0.30    1.30
 -10   5  27    2.10    2.30
  -3   9 -27    3.90    1.50
   9  -6 -27    3.30    0.70
  -6  -3 -27    4.90    1.90
   3  -9  27    2.70    1.50
  -9   6  27    4.40    0.80
   3  -9  27    4.40    1.50
  -9   6  27    4.10    2.20
   6   3  27    0.70    1.30
   0   6 -27    0.90    0.80
   6  -6 -27   -0.40    0.50
  -6   0 -27   -1.20    0.60
  -6   0 -27    0.10    0.50
   0  -6  27   -0.10    0.80
   0  -6  27    0.60    0.90
  -6   6  27   -0.30    0.50
   0  -6  27    0.50    0.70
  -6   6  27   -0.20    1.00
   6   0  27   -0.50    0.50
   3   3 -27    0.60    0.40
   3  -6 -27    1.40    1.10
   6  -3  27   -0.30    0.90
  -3   6  27    0.80    0.80
  -3  -3  27    0.70    0.40
  -3  -3  27   -0.10    1.10
   0  -6 -27    1.30    1.10
   0   6  27   -0.40    1.10
  -6   0  27    0.30    1.30
   6  -6  27    1.00    1.00
  -3  -6 -27    0.20    1.40
   6  -9  27    0.60    1.30
   3   6  27    0.70    1.40
  -9   3  27   -3.30    1.30
   6  -9  27   -0.20    0.40
   6   6  27    1.80    1.90
  -4  11 -27   31.50    4.20
   4 -11  27   33.40    4.70
   7   4  27   36.00    4.80
   8  -7 -27   21.00    2.60
  -7  -1 -27   12.90    2.30
  -7  -1 -27   16.20    3.20
  -8   7  27   18.70    4.10
   1  -8  27   14.80    2.70
   7   1  27   18.60    2.60
  -8   7  27   15.70    2.20
   1  -8  27   15.20    2.70
   2   5 -27   53.49    3.70
   5  -7 -27   50.09    4.20
   7  -2  27   53.49    4.90
  -5   7  27   52.09    4.10
  -2  -5  27   46.60    3.70
  -5   7  27   55.99    6.70
  -2  -5  27   51.29    4.80
   2  -7 -27   17.40    3.10
   7  -5  27   20.60    3.30
  -5  -2  27   16.60    3.20
  -2   7  27   14.50    3.10
  -1  -7 -27   69.59    5.90
  -8   1  27   54.69    6.60
   7  -8  27   68.99    5.80
   1   7  27   46.00    6.10
   4   7  27   13.90    3.40
  10  -8 -27    0.60    0.90
  -8  -2 -27    0.50    1.10
  -2  10 -27    1.60    1.40
  -8  -2 -27    1.50    1.70
   2 -10  27    0.30    1.40
 -10   8  27    2.90    2.50
   2 -10  27    0.90    1.20
   1   7 -27   16.30    2.50
  -8   1 -27   17.10    3.20
  -8   1 -27   14.90    1.60
   7  -8 -27   16.70    2.80
  -8   1 -27   18.00    1.70
  -1  -7  27   13.60    2.90
  -7   8  27   12.70    3.50
  -1  -7  27   11.70    2.30
   4  -8 -27   21.90    3.30
   4   4 -27   15.50    1.30
  -4  -4  27   17.20    1.50
  -4   8  27   11.40    3.00
  -4  -4  27   20.10    3.50
   8  -4  27   15.20    3.00
   1  -8 -27   54.09    6.20
  -7  -1  27   62.29    6.10
  -1   8  27   62.19    6.20
   8  -7  27   57.89    5.50
  -2  -8 -27    7.70    4.30
   8 -10  27    3.50    2.00
 -10   2  27    9.00    4.40
   2   8  27    3.90    2.30
  -3  12 -27    0.00    1.40
  -9   0 -27    0.00    1.30
  -9   0 -27   -0.20    0.70
   0  -9  27   -1.00    1.10
  -9   9  27   -1.20    1.60
   0  -9  27    0.20    1.10
   3   6 -27    3.90    1.20
   6  -9 -27    3.30    1.50
  -3  -6  27    3.60    1.90
  -3  -6  27    2.30    1.00
   9  -3  27    4.90    1.90
  -6   9  27    5.50    2.50
   3  -9 -27    0.10    1.10
  -6  -3  27    1.10    1.60
  -3   9  27    1.50    1.70
   9  -6  27    0.60    1.30
   0  -9 -27    2.60    1.90
  -9   0  27   -0.90    1.40
   0   9  27    3.30    2.30
   9  -9  27    2.80    1.70
   1 -11  27    0.50    2.20
   8 -10 -27    1.10    1.30
 -10   2 -27    1.00    1.60
  -2  -8  27    2.40    1.40
  -2  -8  27    2.00    1.70
  -8  10  27    1.50    3.00
   5 -10 -27    4.10    1.80
  -5  -5  27    3.30    0.80
  -5  10  27    0.70    1.70
  10  -5  27    0.50    1.30
  -5  -5  27   -0.10    1.40
   2 -10 -27    3.20    2.10
  -8  -2  27    9.90    5.00
  10  -8  27    9.10    4.40
  -2  10  27    4.80    2.60
  10 -11 -27    1.90    1.50
  -1 -10  27   -1.10    1.10
   7 -11 -27   29.50    6.90
   4 -11 -27   17.10    4.10
   1  -1 -28  660.63   35.00
   0   1 -28  663.23   34.60
   1  -1 -28  678.03   34.50
  -1   0 -28  679.83   34.90
   1  -1 -28  671.73   34.50
  -1   0 -28  644.24   34.50
   0   1 -28  666.43   34.60
  -1   0 -28  683.23   34.90
   0  -1  28  669.43   34.90
   0  -1  28  670.33   34.60
  -1   1  28  678.33   35.30
   1   0  28  671.53   34.70
  -2  -1 -28  201.18   11.60
   3  -2 -28  175.88   11.50
  -2  -1 -28  222.98   11.80
   3  -2 -28  196.78   10.50
  -2  -1 -28  214.78   11.20
  -1   3 -28  188.88   11.20
   3  -2 -28  187.28   10.50
   2   1  28  193.28   11.20
   1  -3  28  195.08   11.00
  -3   2  28  229.08   12.40
   1  -3  28  187.28   11.10
   1  -3  28  182.78   11.00
   2   0 -28    2.30    0.60
   0  -2 -28    1.90    0.90
   0  -2 -28    0.00    0.80
   2   0 -28    2.00    0.60
   2   0 -28    1.50    0.80
  -2   2 -28    4.20    1.20
   0  -2 -28    2.10    1.00
   0   2  28    1.90    1.20
   2  -2  28    0.60    0.70
   2  -2  28    3.10    0.70
  -2   0  28    4.50    1.60
   2  -2  28    3.40    0.80
  -2   5 -28  777.92   41.20
  -3  -2 -28  844.92   41.70
  -3  -2 -28  770.62   41.10
   2  -5  28  787.72   40.50
   2  -5  28  804.32   40.80
  -5   3  28  797.92   42.40
   3   2  28  714.13   41.00
   2  -5  28  814.52   41.20
   2  -3 -28  202.38   11.10
  -3   1 -28  182.38   11.50
   1   2 -28  196.08   10.80
   2  -3 -28  199.08   11.10
  -3   1 -28  203.98   10.40
  -1  -2  28  199.98   11.60
  -1  -2  28  186.18   11.50
  -2   3  28  196.48   12.10
   3  -1  28  205.18   11.70
   3  -1  28  203.08   10.50
  -1  -2  28  189.08   10.70
  -3   4 -28  124.49    8.10
  -1  -3 -28  123.59    8.10
   4  -1 -28  117.59    8.10
  -1  -3 -28  127.19    8.20
  -1  -3 -28  130.09    8.20
   1   3  28  138.99    8.40
   3  -4  28  126.19    8.10
  -4   1  28  133.59    8.80
   3  -4  28  122.59    6.80
   3  -4  28  123.59    6.80
  -4  -3 -28  139.29    9.60
  -4  -3 -28  146.79    9.30
   3  -7  28  148.39    8.40
  -7   4  28  139.19   10.40
   3  -7  28  131.79    8.60
   4   3  28  140.69    9.20
   0   4 -28  444.26   23.50
  -4   0 -28  458.55   23.10
  -4   0 -28  455.95   24.40
   4  -4 -28  445.36   23.30
   0  -4  28  454.05   23.50
  -4   4  28  428.76   24.90
   0  -4  28  438.56   23.80
   4   0  28  453.85   23.10
   0  -4  28  423.96   23.90
  -4   4  28  429.46   23.20
  -4   3 -28  126.29    8.20
   1  -4 -28  124.39    8.30
   1  -4 -28  123.19    7.80
   4  -3  28  119.99    8.00
  -1   4  28  119.69    8.40
  -3  -1  28  121.59    8.30
  -3  -1  28  128.29    8.40
  -2  -4 -28  453.25   25.10
  -2  -4 -28  445.46   25.00
  -6   2  28  422.16   25.60
   4  -6  28  472.45   24.90
   2   4  28  480.35   25.30
   4  -6  28  442.96   23.30
   4  -6  28  452.35   23.20
  -5  -4 -28   38.60    5.00
   4  -9  28   38.70    4.50
   5   4  28   44.70    4.40
   4  -9  28   35.20    4.60
  -9   5  28   48.80    6.70
   4  -9  28   40.80    3.50
  -5  -1 -28  101.09    7.50
   6  -5 -28  109.89    6.20
  -5  -1 -28  110.99    6.80
  -1   6 -28  107.29    7.00
  -6   5  28   99.69    8.20
   1  -6  28  111.59    7.00
   5   1  28   97.09    6.50
   1  -6  28   99.09    6.80
  -6   5  28  101.49    6.10
   3  -5 -28  784.72   41.70
   2   3 -28  788.82   40.80
  -2  -3  28  789.92   42.20
  -2  -3  28  763.62   42.30
  -3   5  28  860.91   43.20
   5  -2  28  818.62   42.40
  -3   5  28  785.62   41.60
  -2  -3  28  828.02   40.90
   0  -5 -28  238.28   14.50
   5  -5  28  244.18   16.80
   0   5  28  254.67   15.10
  -3  -5 -28   20.60    3.70
   3   5  28   19.00    3.40
   5  -8  28   19.40    1.80
   5  -8  28   18.40    3.10
  -8   3  28   19.80    4.20
  -5  11 -28    8.00    2.50
   5 -11  28    6.70    3.40
   6   5  28    8.20    2.50
  -6  -2 -28  199.78   12.70
   8  -6 -28  204.18   10.70
  -6  -2 -28  193.78   11.90
   6   2  28  191.88   11.70
  -8   6  28  179.08   10.60
  -8   6  28  196.28   13.60
   2  -8  28  193.78   12.10
   2  -8  28  207.58   11.80
   5  -6 -28   97.09    6.60
   1   5 -28   99.59    6.30
  -6   1 -28  103.79    7.50
  -1  -5  28  104.19    6.40
  -5   6  28   97.59    6.40
  -5   6  28  114.29    8.30
  -1  -5  28   99.09    7.10
   2  -6 -28  471.75   26.00
  -2   6  28  484.95   28.10
   6  -4  28  475.65   26.30
  -1  -6 -28   18.10    3.20
  -7   1  28   22.30    4.00
   6  -7  28   17.90    3.30
   1   6  28   16.30    3.50
  -4  -6 -28   53.29    6.70
   6 -10  28   60.59    4.10
   6 -10  28   58.69    6.60
 -10   4  28   65.59    8.10
   4   6  28   48.80    6.30
  -7  -3 -28  126.89    9.70
  -3  10 -28  130.79    9.00
   3 -10  28  122.69    9.20
   7   3  28  118.59    8.80
   3 -10  28  137.39    8.80
 -10   7  28  138.39   11.00
  -7   0 -28  183.18   10.10
  -7   0 -28  175.58   10.30
   7  -7 -28  191.58   10.70
  -7   0 -28  183.28   11.90
  -7   7  28  169.88   10.50
   0  -7  28  183.78   11.30
   0  -7  28  176.98   10.90
  -7   7  28  181.38   12.70
   3   4 -28  141.79    7.70
   4  -7 -28  136.39    9.00
   7  -3  28  136.79    9.50
  -4   7  28  127.69   10.00
  -3  -4  28  137.19    7.80
  -3  -4  28  153.68    9.60
   1  -7 -28   14.40    2.80
  -6  -1  28   14.10    3.00
   7  -6  28   13.50    2.80
  -1   7  28   13.30    3.10
  -2  -7 -28   65.19    8.80
  -9   2  28   78.09    7.60
   2   7  28   84.39    7.20
   4 -12  28    3.70    2.30
   8   4  28    7.30    2.50
  -8  -1 -28  110.99    7.50
   9  -8 -28  114.39    7.50
  -8  -1 -28  133.59    9.40
   1  -9  28  127.29    8.60
   1  -9  28  117.79    8.50
  -9   8  28  128.59   10.30
  -8   2 -28  206.78   13.10
   6  -8 -28  205.58   12.30
   2   6 -28  191.78   11.50
  -2  -6  28  201.08   12.80
  -2  -6  28  210.58   11.70
  -6   8  28  198.48   13.90
   3  -8 -28   25.20    3.80
  -5  -3  28   27.80    4.30
   8  -5  28   31.00    4.30
  -3   8  28   22.40    4.50
   0  -8 -28   38.10    5.10
   8  -8  28   20.20    3.90
   0   8  28   31.60    5.00
  -8   0  28   19.60    5.70
   2 -11  28    4.20    2.10
   2 -11  28    5.70    2.00
  -9   1 -28  122.99    9.20
   8  -9 -28  125.99    8.20
  -9   1 -28  110.69    7.20
  -8   9  28  118.59   10.10
  -1  -8  28  129.59    8.30
  -1  -8  28  121.59    8.80
   4   5 -28   35.70    2.70
   5  -9 -28   35.00    4.50
  -4  -5  28   48.40    5.70
  -5   9  28   47.10    6.40
  -4  -5  28   35.70    2.70
   9  -4  28   36.00    5.00
   2  -9 -28   77.89    6.70
  -7  -2  28   55.89    8.80
   9  -7  28   76.19    6.70
  -2   9  28   88.09   10.30
  10 -10 -28    3.10    1.40
   0 -10  28    1.10    2.00
   0 -10  28    3.00    1.70
 -10   3 -28  122.59    9.90
   7 -10 -28  138.39    9.50
  -3  -7  28  139.29    8.50
  -3  -7  28  128.79    9.90
  -7  10  28  150.18   11.50
   4 -10 -28   54.59    6.20
  10  -6  28   55.09    6.50
  -4  10  28   61.79    7.70
  -6  -4  28   51.39    6.30
   9 -11 -28    3.90    1.80
  -2  -9  28    2.80    1.50
   6 -11 -28    7.80    2.40
   1   0 -29    0.20    0.70
   1   0 -29   -0.10    0.40
   0  -1 -29   -0.10    0.50
   0  -1 -29   -0.20    0.50
  -1   1 -29    0.20    0.60
   1   0 -29    0.10    0.40
   0  -1 -29   -0.70    0.60
  -1   1 -29    0.40    0.50
   0   1  29    1.10    0.90
   1  -1  29    0.40    0.60
   1  -1  29    0.40    0.70
  -1   0  29   -0.90    0.80
   2  -2 -29    1.30    0.60
   0   2 -29    0.10    0.50
  -2   0 -29   -0.50    0.50
  -2   0 -29    0.10    0.50
   2  -2 -29    0.60    0.90
  -2   0 -29   -0.60    0.40
   2  -2 -29    0.70    0.50
   2   0  29    0.30    0.50
   0  -2  29    1.00    0.80
   0  -2  29    2.60    1.20
  -2   2  29    3.90    1.60
   3  -1 -29  119.59    8.10
  -2   3 -29  130.89    8.00
   3  -1 -29  127.09    6.80
   3  -1 -29  127.09    6.80
  -1  -2 -29  125.59    8.00
  -1  -2 -29  137.39    8.60
  -1  -2 -29  135.89    8.10
   1   2  29  130.59    8.20
   2  -3  29  124.69    7.30
   2  -3  29  122.29    7.20
   2  -3  29  130.59    8.00
  -3   1  29  128.89    8.60
  -3  -1 -29    0.50    0.90
   4  -3 -29    0.30    0.40
   4  -3 -29   -0.30    0.40
  -1   4 -29    1.50    0.90
  -3  -1 -29   -0.40    0.60
   1  -4  29    0.20    0.80
   1  -4  29    0.00    0.70
   3   1  29    1.10    0.80
  -4   3  29    1.10    1.60
   1  -4  29    1.00    0.80
   1  -3 -29  125.69    7.80
  -3   2 -29  132.49    8.20
   1  -3 -29  139.39    8.00
   2   1 -29  122.09    6.90
   2   1 -29  125.89    6.90
   1  -3 -29  135.19    8.30
   3  -2  29  125.89    8.10
  -2  -1  29  115.79    8.20
  -2  -1  29  128.59    8.20
  -1   3  29  127.99    8.50
  -3   5 -29   55.39    4.80
  -2  -3 -29   63.39    5.00
  -2  -3 -29   66.59    5.20
  -5   2  29   65.09    5.80
   3  -5  29   67.19    4.00
   2   3  29   65.49    5.10
   3  -5  29   70.09    5.10
   3  -5  29   56.79    4.00
  -4  -2 -29  111.89    8.20
  -4  -2 -29  124.59    7.80
   6  -4 -29  121.79    6.30
   6  -4 -29  114.99    6.30
  -2   6 -29  114.69    7.80
   4   2  29  111.49    7.60
  -6   4  29  129.39    9.20
   2  -6  29  117.19    7.30
   2  -6  29  122.29    7.60
   2  -6  29  119.59    7.80
   1   3 -29    0.00    0.50
  -4   1 -29    0.20    0.30
   3  -4 -29    0.00    0.60
  -4   1 -29   -0.70    0.70
   3  -4 -29    0.10    0.70
  -3   4  29    0.30    1.30
  -1  -3  29   -0.10    0.80
  -1  -3  29   -0.30    0.90
   4  -1  29    0.50    0.40
   4  -1  29   -0.10    0.90
  -1  -3  29   -0.70    0.40
   0  -4 -29    1.40    0.90
   0  -4 -29    0.20    0.80
   0  -4 -29   -1.60    0.50
  -4   0  29    0.00    1.20
   4  -4  29    0.80    0.90
   0   4  29   -1.00    0.70
  -3  -4 -29    6.30    1.90
   4  -7  29    5.50    1.10
   4  -7  29    6.80    2.00
  -7   3  29    8.90    2.60
   4  -7  29    6.70    1.60
   3   4  29    7.60    2.10
  -5  -3 -29    9.20    2.40
  -5  -3 -29    3.60    1.70
   5   3  29   10.40    2.20
   3  -8  29    7.90    2.20
  -8   5  29   10.80    3.30
   3  -8  29   11.80    2.00
   5  -5 -29   -0.20    0.40
   0   5 -29   -0.10    0.50
  -5   0 -29   -0.30    0.80
  -5   0 -29   -1.00    0.40
   0  -5  29   -0.20    0.50
   5   0  29    0.30    0.50
  -5   5  29    0.10    0.60
  -5   5  29   -0.30    1.20
   0  -5  29    0.10    0.80
   0  -5  29    1.40    1.00
   2  -5 -29   70.99    5.20
  -2   5  29   68.89    6.00
   5  -3  29   68.29    5.50
  -3  -2  29   73.89    5.70
  -2   5  29   64.49    5.00
  -1  -5 -29    3.70    1.50
   5  -6  29    4.00    1.50
   1   5  29    1.70    1.40
  -6   1  29    1.10    1.60
  -4  -5 -29   20.80    4.40
   5  -9  29   27.50    4.00
   5  -9  29   23.60    2.30
   5  -9  29   24.20    2.40
   4   5  29   23.30    3.80
  -6  -4 -29    4.10    1.80
   4 -10  29    4.60    1.60
 -10   6  29    3.80    2.40
   6   4  29    3.10    1.60
  -6  -1 -29   20.60    2.70
   7  -6 -29   21.60    2.80
  -6  -1 -29   21.60    3.40
  -7   6  29   20.20    2.30
   6   1  29   18.70    2.50
   1  -7  29   25.00    3.30
  -7   6  29   15.70    3.60
   1  -7  29   25.60    3.30
   4  -6 -29  141.59    8.20
   2   4 -29  123.49    7.20
   6  -2  29  139.89    8.90
  -4   6  29  111.39    9.00
  -2  -4  29  128.69    8.50
  -2  -4  29  119.09    7.20
  -4   6  29  123.29    7.90
   1  -6 -29    0.70    1.20
  -5  -1  29    1.00    1.30
   6  -5  29    3.30    1.50
  -1   6  29    1.30    1.60
  -2  -6 -29   91.49    7.60
  -8   2  29  106.09    8.60
   2   6  29  100.69    7.90
   6  -8  29   94.59    7.50
   5   6  29    0.50    1.60
   7   5  29    4.30    2.10
  -7  -2 -29    9.00    2.50
  -9   7  29    5.30    2.40
   2  -9  29    5.80    1.70
   7   2  29    4.40    1.60
   2  -9  29    6.30    2.00
  -7   1 -29   21.70    3.60
   6  -7 -29   20.80    2.90
   1   6 -29   20.00    3.00
  -6   7  29   21.90    4.30
  -1  -6  29   25.80    3.60
  -1  -6  29   25.20    3.00
  -6   7  29   26.10    3.10
   7  -4  29    9.50    2.40
  -3   7  29    9.30    2.80
  -4  -3  29    7.30    2.20
   0  -7 -29    0.40    1.20
  -7   0  29   -0.90    1.40
   7  -7  29    0.30    1.10
   0   7  29    0.40    1.30
   3   7  29    1.70    1.80
   7 -10  29    1.10    1.40
   8   3  29    2.20    1.70
   3 -11  29    3.70    2.40
   3 -11  29    1.60    1.30
  -8   0 -29   -0.10    0.70
  -8   0 -29    2.20    1.60
   8  -8 -29    0.30    0.90
  -8   8  29    1.20    1.70
   0  -8  29   -0.50    0.90
   0  -8  29   -0.40    1.10
  -8   8  29   -0.30    0.80
   3   5 -29    7.50    1.30
   5  -8 -29    8.90    2.20
  -5   8  29    5.40    2.40
  -3  -5  29    7.00    2.20
   8  -3  29    9.90    2.60
   2  -8 -29   90.99    7.30
   8  -6  29   91.19    7.40
  -6  -2  29  103.79    8.10
  -2   8  29   94.19    8.10
  -1  -8 -29   30.30    4.70
   8  -9  29   27.30    4.30
  -9   1  29   21.70    4.70
   1 -10  29   10.40    2.90
   1 -10  29    8.60    2.70
  -9   2 -29    8.80    2.50
   7  -9 -29    5.30    1.80
   2   7 -29    4.00    1.60
  -2  -7  29    8.30    2.60
  -7   9  29    8.10    2.90
  -2  -7  29    8.60    1.80
   4  -9 -29   37.90    4.80
   9  -5  29   36.90    7.30
  -4   9  29   26.30    5.10
  -5  -4  29   26.00    4.50
   1  -9 -29   24.60    4.10
   9  -8  29   30.70    4.50
  -8  -1  29   23.10    4.50
  -1   9  29   25.20    4.80
   9 -10 -29    9.50    2.20
  -1  -9  29    9.00    2.30
  -1  -9  29    4.40    2.00
   6 -10 -29    6.00    2.20
  -4  -6  29    5.80    1.40
  -4  -6  29    6.80    2.40
  10  -4  29    8.10    2.40
  -6  10  29    4.10    2.50
   3 -10 -29    2.30    1.70
  -7  -3  29    1.80    1.90
  -3  10  29    3.40    2.10
   5 -11 -29   -0.10    1.30
   0   0 -30 1830.22   91.59
   0   0 -30 1795.12   91.69
   0   0  30 1801.22   91.99
   2  -1 -30  395.66   21.40
   2  -1 -30  418.56   21.50
  -1  -1 -30  418.36   22.20
  -1  -1 -30  434.96   22.10
  -1  -1 -30  401.56   22.20
   2  -1 -30  395.36   22.30
  -1   2 -30  413.96   22.10
  -2   1  30  438.76   22.90
   1  -2  30  404.76   21.90
   1  -2  30  405.46   21.80
   1  -2  30  404.46   22.10
   1   1  30  423.86   22.30
   1  -2 -30  413.06   22.00
   1   1 -30  398.16   22.20
   1   1 -30  412.36   21.80
   1  -2 -30  406.56   22.00
  -2   1 -30  432.96   22.50
   1   1 -30  412.06   21.60
  -2   1 -30  406.86   21.50
   1  -2 -30  392.46   22.40
   2  -1  30  437.06   22.50
  -1  -1  30  394.36   22.30
  -1  -1  30  455.95   22.70
  -1   2  30  394.66   22.70
   2  -1  30  435.26   21.70
  -2  -2 -30  213.58   12.10
  -2  -2 -30  215.48   12.50
   2  -4  30  203.08   11.50
  -4   2  30  195.08   12.90
   2   2  30  217.28   12.20
   2  -4  30  205.88   12.10
  -3   0 -30  597.24   31.60
   3  -3 -30  607.64   30.70
  -3   0 -30  603.84   30.60
  -3   0 -30  608.74   31.70
   3  -3 -30  601.24   30.70
   3  -3 -30  581.64   31.80
   0   3 -30  569.74   30.80
   0  -3  30  598.54   31.20
   0  -3  30  614.24   30.90
   3   0  30  555.74   30.60
  -3   3  30  604.64   32.30
   0  -3  30  569.94   31.20
   0  -3 -30   18.70    2.80
   0  -3 -30   19.90    2.70
  -3   3 -30   18.60    2.70
   3   0 -30   14.80    2.50
   0  -3 -30   17.20    2.40
  -3   0  30   12.40    2.60
   3  -3  30   20.40    2.70
  -3  -3 -30  191.88   12.10
  -3  -3 -30  191.98   11.70
   3  -6  30  182.38   10.30
   3   3  30  180.88   11.30
   3  -6  30  185.48   11.30
   3  -6  30  172.58   10.40
  -6   3  30  194.08   12.50
   5  -4 -30   27.20    2.20
  -1   5 -30   33.30    4.20
  -4  -1 -30   28.10    2.70
   5  -4 -30   27.20    2.20
  -4  -1 -30   25.50    3.50
   1  -5  30   32.50    2.90
   1  -5  30   35.00    3.60
   4   1  30   24.40    2.60
   1  -5  30   24.70    3.20
  -5   4  30   34.30    4.60
   2   2 -30  211.38   11.40
   2  -4 -30  215.58   13.10
   2  -4 -30  210.48   12.40
   2  -4 -30  215.68   12.40
  -2  -2  30  207.88   11.40
  -2  -2  30  218.68   12.90
  -2   4  30  232.28   13.50
   4  -2  30  215.58   12.90
  -2  -2  30  223.98   13.00
  -1  -4 -30  321.77   19.90
  -1  -4 -30  370.56   20.20
   1   4  30  383.66   20.40
  -5   1  30  329.77   20.60
   4  -5  30  374.66   20.10
  -4  -4 -30   25.00    3.80
  -8   4  30   14.70    3.70
   4  -8  30   12.70    2.60
   4  -8  30   15.70    2.10
   4   4  30   16.20    3.00
   4  -8  30   17.10    2.40
   7  -5 -30   10.40    1.10
   7  -5 -30    9.30    1.10
  -5  -2 -30   10.60    2.00
  -5  -2 -30    9.70    2.40
   2  -7  30   10.00    1.90
  -7   5  30   11.20    3.00
   5   2  30    7.90    1.90
   1   4 -30   31.10    2.60
  -5   1 -30   33.50    4.20
   4  -5 -30   31.30    3.30
  -1  -4  30   32.90    3.80
  -1  -4  30   30.10    2.60
  -1  -4  30   32.50    4.10
  -4   5  30   35.10    5.00
  -4   5  30   27.10    3.00
   1  -5 -30  380.06   20.50
  -1   5  30  387.06   21.20
   5  -4  30  303.37   21.60
  -4  -1  30  375.36   21.00
  -2  -5 -30  114.79    8.50
  -7   2  30  104.59    8.90
   5  -7  30  117.59    8.30
   2   5  30  131.39    9.60
  -5  -5 -30   34.10    5.80
   5   5  30   38.00    5.00
   5 -10  30   39.40    5.10
 -10   5  30   22.60    5.30
   5 -10  30   29.60    2.90
  -6  -3 -30   85.89    7.10
  -9   6  30   76.89    7.70
   3  -9  30   85.09    6.60
   3  -9  30   81.69    5.90
   6   3  30   77.59    6.20
  -6   0 -30    0.70    1.00
   6  -6 -30    2.80    1.00
  -6   0 -30    1.60    0.80
   0   6 -30    0.80    0.90
   0  -6  30    3.60    1.20
  -6   6  30   -1.00    1.10
  -6   6  30    2.00    0.90
   6   0  30    2.30    0.80
   0  -6  30    2.50    1.30
   3   3 -30  187.08    9.40
   3  -6 -30  187.38   11.10
   6  -3  30  177.38   11.50
  -3  -3  30  182.68    9.50
  -3   6  30  179.98   10.90
  -3   6  30  159.48   11.90
   0  -6 -30  169.38   11.30
  -6   0  30  185.28   12.10
   0   6  30  168.08   11.70
   6  -6  30  176.18   11.30
  -3  -6 -30   39.10    5.00
  -9   3  30   30.70    5.30
   6  -9  30   38.30    5.00
   3   6  30   39.80    5.30
   4 -11  30   22.70    3.30
   7   4  30   21.00    3.60
   8  -7 -30  125.89    7.40
  -7  -1 -30  119.69    7.70
  -7  -1 -30  105.99    8.90
   7   1  30  135.59    7.70
  -8   7  30  121.29   10.20
  -8   7  30  112.29    7.20
   1  -8  30  113.99    8.10
   1  -8  30  119.99    8.20
   5  -7 -30    6.70    1.70
  -7   2 -30   10.20    2.50
   2   5 -30    9.30    1.60
   7  -2  30    6.10    2.00
  -2  -5  30    8.30    1.50
  -2  -5  30    7.40    2.30
  -5   7  30    8.50    2.10
  -5   7  30   11.30    3.20
   2  -7 -30  101.59    7.80
  -2   7  30  116.19    8.80
  -5  -2  30  118.69    8.60
   7  -5  30  107.99    8.10
  -1  -7 -30   16.00    3.40
  -8   1  30   13.80    3.50
   7  -8  30   15.50    3.30
   1   7  30   13.20    3.10
   4   7  30   65.99    6.60
   2 -10  30   30.70    6.40
   2 -10  30   27.30    3.90
   7  -8 -30  135.39    8.20
  -8   1 -30  120.19    9.50
  -1  -7  30  110.89    7.80
  -7   8  30  115.19   10.10
  -1  -7  30  126.69    8.80
   4  -8 -30   10.40    2.40
  -4  -4  30   13.70    2.90
  -4   8  30   15.40    3.50
   8  -4  30   15.80    3.10
   1  -8 -30   18.50    3.50
  -7  -1  30   18.20    3.90
   8  -7  30   17.30    3.40
  -1   8  30   22.50    4.30
   2   8  30   44.60    6.50
   9  -9 -30   -0.30    0.80
   0  -9  30    1.20    1.20
   0  -9  30   -1.40    1.00
   6  -9 -30   89.79    6.70
  -9   3 -30   92.09    7.40
  -6   9  30   71.49    7.60
   9  -3  30   76.19    6.90
  -3  -6  30   88.29    7.10
  -3  -6  30   81.49    5.40
   3  -9 -30   42.40    5.40
   9  -6  30   39.00    5.00
   0   9  30   39.00    5.80
   8 -10 -30   27.50    3.80
  -2  -8  30   31.60    3.80
  -2  -8  30   22.40    3.90
   5 -10 -30   36.50    4.80
  -5  10  30   39.60    6.70
  10  -5  30   29.90    5.20
  -5  -5  30   33.30    5.10
   7 -11 -30   27.40    4.40
   0   1 -31    0.00    0.50
  -1   0 -31   -0.20    0.50
   0   1 -31    0.00    0.50
  -1   0 -31   -0.10    0.60
   1  -1 -31    0.90    0.80
  -1   0 -31   -1.00    0.40
   1  -1 -31    0.10    0.50
   0   1 -31    0.60    0.60
  -1   1  31    0.20    1.00
   0  -1  31   -0.10    0.50
   1   0  31    0.80    0.80
   0  -1  31    4.80    1.40
  -2  -1 -31   87.59    6.00
  -2  -1 -31   81.09    5.50
  -1   3 -31   81.29    5.60
   3  -2 -31   84.49    6.10
   3  -2 -31   87.79    5.10
   3  -2 -31   79.59    4.90
  -2  -1 -31   95.29    6.10
   1  -3  31   85.09    5.60
  -3   2  31   88.19    6.60
   1  -3  31   81.09    5.50
   1  -3  31   82.79    5.50
   2   0 -31   -0.30    0.30
   0  -2 -31   -0.10    0.70
   0  -2 -31   -0.20    0.60
   0  -2 -31    1.00    0.70
   2   0 -31    0.90    0.50
   2   0 -31    0.00    0.70
  -2   2 -31    1.90    1.10
  -2   0  31    1.30    1.10
   2  -2  31    0.20    0.60
   2  -2  31    0.30    0.70
   0   2  31    1.10    1.00
   2  -2  31   -0.10    0.40
  -3  -2 -31    4.60    1.60
  -2   5 -31    3.70    1.40
  -3  -2 -31    5.10    1.60
   3   2  31    4.50    1.40
   2  -5  31    3.20    1.10
  -5   3  31    5.60    2.30
   2  -5  31    5.10    1.40
  -3   1 -31   87.59    6.00
   2  -3 -31   82.29    5.40
   1   2 -31   78.79    5.10
  -3   1 -31   86.29    4.80
  -3   1 -31   81.99    6.00
   2  -3 -31   82.59    5.50
   2  -3 -31   82.99    6.10
   3  -1  31   87.99    6.10
   3  -1  31   80.29    4.80
  -1  -2  31   85.19    6.00
  -1  -2  31   82.99    5.90
  -1  -2  31   79.69    5.10
  -2   3  31   84.89    6.50
  -1  -3 -31   43.80    3.90
  -1  -3 -31   40.30    3.90
  -3   4 -31   51.19    4.00
  -4   1  31   38.00    4.80
   3  -4  31   41.10    2.60
   3  -4  31   42.40    3.80
   3  -4  31   39.90    2.60
   1   3  31   39.70    3.90
  -4  -3 -31    7.80    2.10
  -4  -3 -31   13.00    2.40
   4   3  31    9.20    2.10
   3  -7  31    7.60    1.90
   3  -7  31    7.40    1.70
  -7   4  31    6.00    2.30
   3  -7  31    9.10    1.60
   4  -4 -31    0.60    0.70
   4  -4 -31   -0.10    0.50
  -4   0 -31   -0.20    0.50
   0   4 -31   -0.30    0.60
  -4   0 -31   -0.10    1.40
   4   0  31    0.00    0.60
  -4   4  31    0.80    1.50
   0  -4  31    1.50    0.80
   0  -4  31   -1.10    0.70
   0  -4  31    0.10    0.70
   1  -4 -31   44.30    3.70
   1  -4 -31   41.00    3.70
   1  -4 -31   40.20    4.00
   4  -3  31   36.70    4.20
  -1   4  31   39.80    4.10
  -3  -1  31   41.40    4.20
  -2  -4 -31   17.50    3.00
   2   4  31   15.30    2.80
  -6   2  31   14.10    3.20
   4  -6  31   18.30    3.10
  -5  -4 -31   61.19    6.90
   5   4  31   64.89    5.60
  -9   5  31   72.39    8.50
   4  -9  31   59.59    5.60
   4  -9  31   61.79    4.60
   6  -5 -31   66.29    4.00
  -5  -1 -31   66.59    5.40
   6  -5 -31   56.99    3.80
  -1   6 -31   60.29    4.70
  -5  -1 -31   58.09    4.40
   5   1  31   59.69    4.30
   1  -6  31   60.39    4.90
   1  -6  31   54.59    4.60
  -6   5  31   68.19    6.30
   1  -6  31   59.19    4.70
   2   3 -31    3.30    0.80
   3  -5 -31    4.90    1.40
  -2  -3  31    2.40    1.40
  -2  -3  31    4.40    0.90
   5  -2  31    4.20    1.70
   0  -5 -31    1.00    1.10
   5  -5  31    1.60    1.10
   0   5  31    0.00    1.10
  -5   0  31    0.60    1.50
  -3  -5 -31   14.90    3.40
   5  -8  31   10.30    1.30
  -8   3  31   11.80    3.40
   5  -8  31   12.80    1.30
   3   5  31   15.90    3.10
   5  -8  31   13.40    2.70
   6   5  31   18.70    3.60
   8  -6 -31    0.80    0.50
  -6  -2 -31    1.50    1.00
  -6  -2 -31   -1.20    1.10
   2  -8  31    1.60    1.20
  -8   6  31   -0.40    1.70
   2  -8  31    0.50    1.00
   6   2  31    1.90    1.10
  -8   6  31    0.60    0.50
  -6   1 -31   65.19    5.60
   5  -6 -31   67.49    4.80
   1   5 -31   65.09    4.50
  -5   6  31   65.89    6.20
  -5   6  31   63.69    4.60
  -1  -5  31   62.99    4.50
  -1  -5  31   61.49    5.20
   2  -6 -31   16.80    2.90
  -4  -2  31   15.40    3.00
   6  -4  31   15.40    2.90
  -2   6  31   19.10    3.70
  -1  -6 -31   73.99    6.50
   1   6  31   75.59    6.80
   6  -7  31   83.79    6.60
  -7   1  31   84.19    7.30
   6 -10  31    4.20    2.00
   4   6  31    6.60    2.40
   3 -10  31    2.50    1.90
   7   3  31    5.20    1.90
   3 -10  31    5.00    1.60
  -7   0 -31    1.20    1.40
  -7   0 -31   -0.30    0.50
   7  -7 -31    0.00    0.70
   0  -7  31    0.40    0.70
  -7   7  31   -1.70    1.30
   0  -7  31   -0.70    1.10
  -7   7  31   -0.10    0.70
   3   4 -31    9.00    1.10
   4  -7 -31   12.90    2.40
  -3  -4  31    6.90    1.10
  -4   7  31   11.00    3.20
  -3  -4  31   11.00    2.50
   7  -3  31    6.40    2.10
   1  -7 -31   82.29    6.80
   7  -6  31   77.99    6.70
  -1   7  31   83.19    7.30
  -6  -1  31   90.69    7.40
  -2  -7 -31   14.60    3.50
  -9   2  31   15.80    3.90
   7  -9  31   13.90    3.10
   2   7  31   12.10    3.00
  -8  -1 -31    0.40    0.80
   9  -8 -31    0.10    0.80
   1  -9  31    1.20    1.30
   1  -9  31    1.30    1.20
  -8   2 -31    2.70    1.70
   2   6 -31    2.20    1.00
   6  -8 -31    1.50    1.10
  -2  -6  31    1.50    1.40
  -6   8  31    0.40    1.60
  -2  -6  31    1.20    1.00
   3  -8 -31   11.80    2.60
  -3   8  31   17.10    3.70
   8  -5  31   11.10    2.90
  -5  -3  31   17.30    3.60
   0  -8 -31    1.10    1.50
  -8   0  31    0.00    1.60
   0   8  31    1.10    1.70
   8  -8  31    0.60    1.20
   2 -11  31    4.00    2.00
   8  -9 -31    0.40    1.00
  -1  -8  31   -0.10    0.90
  -1  -8  31    1.90    1.60
   5  -9 -31   65.69    5.60
   9  -4  31   50.99    6.30
  -4  -5  31   68.09    6.20
  -4  -5  31   54.99    3.60
  -5   9  31   77.39    8.70
   2  -9 -31    9.60    3.50
  -2   9  31   12.40    3.30
  -7  -2  31   21.20    4.30
   9  -7  31   11.30    2.90
   0 -10  31   -1.20    1.00
   7 -10 -31    3.30    1.70
  -3  -7  31    4.80    2.20
   4 -10 -31    0.80    1.30
  -6  -4  31    1.00    2.00
   6 -11 -31   24.60    4.10
  -1   1 -32  142.49    8.30
  -1   1 -32  143.19    8.70
   1   0 -32  145.59    8.20
   0  -1 -32  138.69    8.70
   1   0 -32  136.89    8.70
   0  -1 -32  138.29    8.50
  -1   1 -32  143.69    8.60
   1   0 -32  144.49    8.30
   0  -1 -32  144.59    8.60
  -1   0  32  146.39    9.10
   1  -1  32  149.49    8.60
   0   1  32  142.89    8.90
   1  -1  32  146.59    8.70
   2  -2 -32  813.22   40.40
   0   2 -32  762.22   40.50
  -2   0 -32  811.52   41.10
  -2   0 -32  790.72   41.10
  -2   0 -32  750.12   40.30
   2  -2 -32  724.53   41.10
   2  -2 -32  835.12   40.60
   2   0  32  809.42   40.50
   0  -2  32  772.92   40.90
   0  -2  32  763.62   40.50
  -2   2  32  830.12   41.80
   0  -2  32  761.32   40.80
   3  -1 -32   10.30    1.10
   3  -1 -32    9.50    1.10
  -2   3 -32    6.50    1.90
   3  -1 -32    8.20    2.00
  -1  -2 -32    7.00    1.70
  -1  -2 -32    9.10    1.80
  -1  -2 -32    8.60    1.90
   2  -3  32   10.10    1.90
   2  -3  32    8.70    1.40
   1   2  32    8.20    1.90
   2  -3  32    8.10    1.40
  -3   1  32    5.10    2.00
  -3  -1 -32  603.44   32.90
   4  -3 -32  626.44   32.40
   4  -3 -32  596.74   32.30
  -1   4 -32  625.04   33.30
  -3  -1 -32  660.53   33.90
   1  -4  32  643.14   33.20
  -4   3  32  693.23   34.80
   1  -4  32  615.74   33.20
   3   1  32  636.24   34.30
   1  -4  32  643.44   33.10
   1  -3 -32   10.40    2.00
   2   1 -32    9.70    1.10
   1  -3 -32    8.20    1.70
   2   1 -32   10.00    1.20
   1  -3 -32    7.20    1.80
  -3   2 -32    6.60    1.70
   3  -2  32   10.40    2.10
  -2  -1  32    8.70    2.20
   3  -2  32    8.60    0.80
  -1   3  32    8.40    2.20
  -2  -1  32    7.40    1.90
   3  -2  32    8.20    0.90
  -2  -3 -32  236.18   13.90
  -2  -3 -32  233.18   14.50
   3  -5  32  221.88   12.30
   3  -5  32  236.08   13.60
   3  -5  32  228.68   12.40
  -5   2  32  235.78   14.70
   2   3  32  231.68   13.70
  -4  -2 -32  115.49    7.70
  -4  -2 -32   93.39    6.70
   2  -6  32   96.79    6.50
  -6   4  32  104.99    8.30
   2  -6  32  102.19    6.70
   4   2  32  107.79    6.90
   2  -6  32   97.49    6.90
   3  -4 -32  617.24   32.20
   1   3 -32  613.04   31.80
  -4   1 -32  634.64   33.10
   3  -4 -32  596.34   32.10
  -1  -3  32  610.24   31.80
  -3   4  32  582.04   33.50
  -1  -3  32  603.84   32.80
  -1  -3  32  665.93   33.00
   0  -4 -32   70.69    5.40
   0  -4 -32   64.49    5.50
   0   4  32   67.69    5.70
   4  -4  32   64.39    5.30
  -4   0  32   68.79    5.90
  -3  -4 -32  145.19   10.00
   4  -7  32  149.69    9.80
   4  -7  32  142.39    8.10
   3   4  32  148.79    9.80
   4  -7  32  146.49    8.30
  -7   3  32  146.89   10.90
  -5  -3 -32  123.59    8.80
  -8   5  32  123.59    9.60
   5   3  32  110.89    7.70
   3  -8  32  109.19    7.10
   3  -8  32  101.09    7.80
  -5   0 -32   91.69    6.90
   5  -5 -32   85.69    5.70
  -5   0 -32   94.59    5.50
   5  -5 -32   90.69    5.80
   0   5 -32   91.69    6.00
   0  -5  32   95.19    6.50
  -5   5  32   82.79    7.40
   5   0  32   89.99    5.40
   0  -5  32   90.59    6.00
   0  -5  32   96.19    6.70
   2  -5 -32  217.88   13.40
   2  -5 -32  229.18   13.40
  -3  -2  32  238.78   14.10
   5  -3  32  236.98   14.00
  -1  -5 -32  361.46   21.50
   5  -6  32  363.86   21.30
  -6   1  32  404.96   22.50
  -4  -5 -32   49.00    6.10
  -9   4  32   42.00    6.30
   5  -9  32   55.89    3.80
   4   5  32   49.20    5.10
   5  -9  32   49.70    5.90
   4 -10  32   11.80    2.20
   4 -10  32    8.30    2.50
   6   4  32   10.00    2.40
   7  -6 -32  262.37   13.80
  -6  -1 -32  241.78   13.80
  -6  -1 -32  259.27   15.30
  -7   6  32  259.27   16.40
   1  -7  32  232.08   14.30
   6   1  32  224.08   13.60
  -7   6  32  238.68   13.30
   1  -7  32  263.47   14.50
   4  -6 -32  106.29    6.80
   2   4 -32  100.69    5.80
   6  -2  32  100.29    7.40
  -4   6  32   99.69    6.60
  -2  -4  32   93.29    5.80
  -4   6  32   88.49    7.80
   1  -6 -32  395.86   21.10
  -5  -1  32  370.76   21.50
  -1   6  32  322.47   21.20
   6  -5  32  380.46   21.20
  -2  -6 -32   31.80    4.80
  -8   2  32   55.59    7.50
   6  -8  32   43.80    5.10
   2   6  32   34.10    4.90
   5   6  32   34.80    5.30
  -7  -2 -32  108.39    8.60
   7   2  32  105.89    7.30
   2  -9  32  102.59    7.90
  -9   7  32  111.39    9.60
   2  -9  32  115.09    7.80
   6  -7 -32  249.28   14.10
  -7   1 -32  252.37   15.40
  -1  -6  32  242.38   13.90
  -6   7  32  220.38   13.80
  -1  -6  32  264.07   15.00
  -6   7  32  260.67   16.40
   3  -7 -32  156.38   10.10
  -4  -3  32  146.79   10.50
   7  -4  32  158.88   10.60
  -3   7  32  155.58   11.20
   0  -7 -32   38.20    5.00
   0   7  32   42.70    5.70
  -7   0  32   41.20    5.80
   7  -7  32   45.70    5.30
   3   7  32   33.00    5.10
   3 -11  32    5.70    2.20
  -8   0 -32  158.08   12.20
   8  -8 -32  190.98   11.10
   0  -8  32  197.28   11.70
   0  -8  32  211.08   12.40
  -8   8  32  172.98   13.50
   3   5 -32  103.79    6.20
   5  -8 -32  120.09    7.90
   8  -3  32  109.99    8.30
  -5   8  32   98.29    8.80
  -3  -5  32  107.19    6.30
  -3  -5  32  108.89    8.20
   2  -8 -32   48.30    5.70
  -2   8  32   44.80    6.30
  -6  -2  32   49.60    6.30
   8  -6  32   43.10    5.50
   1   8  32   43.70    6.20
   1 -10  32    6.20    2.20
   1 -10  32    0.30    1.20
   7  -9 -32  106.79    7.50
  -9   2 -32  117.29    8.70
  -2  -7  32   98.09    8.00
  -7   9  32  102.59    9.30
  -2  -7  32   98.29    6.80
   4  -9 -32   52.79    6.10
   9  -5  32   51.29    6.10
  -4   9  32   52.59    7.10
   1  -9 -32   43.40    5.80
  -1   9  32   35.30    5.80
   9 -10 -32    3.20    1.60
  -1  -9  32    1.90    1.40
  -1  -9  32    2.50    2.00
   6 -10 -32   11.90    2.90
  -4  -6  32   12.10    3.20
   3 -10 -32   45.00    5.90
   8 -11 -32    6.50    2.30
   0   0 -33    0.70    0.70
   0   0 -33    0.40    0.60
   0   0 -33    0.00    0.60
   0   0  33   -0.20    0.70
  -1  -1 -33   33.70    3.60
   2  -1 -33   29.70    2.30
  -1  -1 -33   28.40    2.80
  -1   2 -33   31.60    3.50
   2  -1 -33   32.10    3.10
  -1  -1 -33   30.90    3.40
   2  -1 -33   28.00    2.30
   1  -2  33   27.50    2.70
   1  -2  33   29.00    3.30
   1  -2  33   27.00    2.50
   1   1  33   31.70    3.50
  -2   1  33   35.20    4.20
   1  -2 -33   29.40    2.70
   1   1 -33   29.70    2.90
  -2   1 -33   28.20    3.40
  -2   1 -33   29.90    3.60
   1  -2 -33   29.00    3.10
   1   1 -33   30.70    2.50
  -2   1 -33   28.20    2.30
   1   1 -33   32.00    2.50
   2  -1  33   30.50    2.60
  -1  -1  33   36.00    3.20
  -1   2  33   29.90    3.90
  -1  -1  33   33.70    3.90
  -2  -2 -33   21.80    3.30
  -2  -2 -33   17.70    2.60
  -2   4 -33   22.00    3.00
   2  -4  33   15.60    2.50
   2   2  33   20.80    2.90
  -4   2  33   21.70    3.80
   2  -4  33   18.60    1.90
   2  -4  33   18.80    2.20
  -3   0 -33    0.10    0.90
  -3   0 -33   -0.80    0.70
   3  -3 -33    1.20    1.10
   0   3 -33    0.30    0.60
   3  -3 -33    0.60    0.60
   0  -3  33   -0.20    0.90
   3   0  33    0.20    0.60
   0  -3  33   -0.20    0.70
  -3   3  33    2.40    1.50
   0  -3  33    0.50    0.60
   0  -3 -33    0.50    0.80
  -3   3 -33   -0.30    0.80
   0  -3 -33    0.50    0.80
   0  -3 -33    0.30    0.90
  -3   0  33   -0.40    1.10
   0   3  33   -0.30    0.90
   3  -3  33   -1.20    0.50
  -3  -3 -33   14.00    2.80
  -3  -3 -33    7.20    2.00
   3  -6  33    8.90    2.20
   3  -6  33   12.10    1.70
  -6   3  33    8.30    2.80
   3  -6  33    9.00    1.50
   3   3  33    9.80    2.10
  -4  -1 -33   10.80    1.90
  -4  -1 -33   13.70    2.70
   5  -4 -33   13.30    1.50
   5  -4 -33   13.70    1.50
  -1   5 -33   10.40    2.00
  -5   4  33   14.40    3.30
   1  -5  33   11.60    2.20
   1  -5  33   13.00    2.20
   1  -5  33   12.20    2.20
   2   2 -33   16.50    1.50
   2  -4 -33   23.20    2.90
   2   2 -33   18.20    1.50
  -2  -2  33   19.20    3.00
   4  -2  33   22.10    3.20
  -2   4  33   17.60    3.30
  -2  -2  33   17.10    2.80
  -1  -4 -33   46.00    5.20
   4  -5  33   52.09    4.60
   1   4  33   52.39    4.80
  -5   1  33   57.89    5.60
  -4  -4 -33  110.99    8.80
   4  -8  33  122.59    7.60
  -8   4  33  116.49    9.80
   4  -8  33  113.69    7.30
   4   4  33  135.39    9.40
   4  -8  33  117.99    8.50
  -5  -2 -33   15.60    2.60
  -5  -2 -33   13.10    2.90
   2  -7  33   17.90    3.00
  -7   5  33    8.80    2.90
   2  -7  33   19.70    2.90
   2  -7  33   15.50    2.50
   5   2  33   17.00    2.60
   4  -5 -33   12.90    2.10
   1   4 -33   11.40    1.80
   4  -5 -33   11.60    2.00
  -5   1 -33   15.40    2.80
  -1  -4  33   14.50    2.00
  -1  -4  33   12.90    2.50
  -4   5  33   13.00    3.10
  -1  -4  33   11.30    2.60
   1  -5 -33   49.10    4.40
   5  -4  33   49.99    4.60
  -4  -1  33   50.89    5.00
  -2  -5 -33   37.30    5.00
  -7   2  33   41.60    5.80
   2   5  33   40.40    5.20
   5  -7  33   37.60    4.60
   5 -10  33    0.10    1.10
   5   5  33    0.40    1.50
  -6  -3 -33    2.20    1.80
  -9   6  33   -0.60    1.70
   6   3  33    2.50    1.60
   3  -9  33   -0.70    0.90
   3  -9  33   -0.30    1.10
  -6   0 -33    0.50    0.60
  -6   0 -33    0.30    1.10
   0   6 -33   -0.40    0.60
   6  -6 -33    0.80    0.70
  -6   6  33   -0.10    1.30
  -6   6  33    0.50    0.70
   0  -6  33    0.10    0.90
   6   0  33    0.60    0.50
   0  -6  33   -1.10    0.50
   3  -6 -33   13.80    2.50
  -3   6  33   14.00    3.30
   6  -3  33    6.70    2.00
  -3  -3  33   11.60    2.60
   0  -6 -33   -0.40    1.00
   6  -6  33   -0.50    0.90
   0   6  33    1.10    1.40
  -6   0  33    1.30    1.60
  -3  -6 -33    6.50    2.40
  -9   3  33    8.30    3.00
   3   6  33    2.00    1.70
   6  -9  33    7.50    2.20
   7   4  33    4.30    1.90
  -7  -1 -33   25.60    4.20
   8  -7 -33   21.20    2.40
   7   1  33   23.60    2.80
   1  -8  33   29.30    3.90
  -8   7  33   19.00    4.10
   1  -8  33   23.30    3.30
   2   5 -33   14.60    1.90
  -7   2 -33   17.80    3.30
   5  -7 -33   16.10    2.60
  -2  -5  33   15.40    2.90
  -5   7  33   12.80    3.40
  -2  -5  33   15.30    2.00
   2  -7 -33   37.00    4.50
  -5  -2  33   39.60    5.30
   7  -5  33   34.70    4.70
  -2   7  33   45.40    6.10
  -1  -7 -33    7.10    2.40
   1   7  33   10.80    3.00
  -8   1  33    8.50    2.90
   7  -8  33    8.80    2.50
   2 -10  33   -0.10    1.00
   2 -10  33    1.20    1.40
  -8   1 -33   23.40    4.00
   7  -8 -33   22.60    3.10
  -7   8  33   24.80    5.10
  -1  -7  33   22.40    3.60
  -1  -7  33   24.80    3.20
   4  -8 -33  125.49    8.60
  -4   8  33  119.39    9.70
  -4  -4  33  114.19    9.00
   8  -4  33  122.49    9.10
   1  -8 -33    7.70    2.30
  -7  -1  33   14.30    3.50
   8  -7  33    5.60    2.10
  -1   8  33   10.10    3.00
   0  -9  33    0.50    1.10
   6  -9 -33    0.70    1.10
  -9   3 -33   -1.20    1.10
  -3  -6  33    0.00    0.60
  -6   9  33    4.50    2.50
  -3  -6  33   -1.10    1.30
   3  -9 -33    6.20    2.20
  -6  -3  33    8.60    3.00
   9  -6  33    6.70    2.20
  -3   9  33    5.00    2.60
   8 -10 -33    0.50    1.00
  -2  -8  33   -0.30    1.50
   5 -10 -33    1.00    1.70
   7 -11 -33    2.30    1.70
  -1   0 -34  396.46   20.80
  -1   0 -34  418.36   21.20
   0   1 -34  397.46   20.80
   1  -1 -34  377.66   20.70
   0   1 -34  401.06   20.90
   1  -1 -34  388.06   20.70
   0   1 -34  384.56   20.80
   1  -1 -34  353.16   21.10
   0  -1  34  386.66   21.20
  -1   1  34  393.26   21.70
   1   0  34  390.56   21.10
   3  -2 -34 1104.29   54.79
  -2  -1 -34 1101.89   55.69
  -1   3 -34 1069.39   55.29
   3  -2 -34 1085.99   54.49
  -2  -1 -34 1057.79   55.09
   1  -3  34 1057.69   55.09
  -3   2  34 1076.89   56.39
   1  -3  34 1066.49   55.29
   1  -3  34 1031.40   54.99
   2   1  34 1087.19   55.29
   2   0 -34  160.48    9.10
   0  -2 -34  186.88   10.20
   2   0 -34  148.29   10.00
   0  -2 -34  185.68   10.40
  -2   2 -34  176.38   10.30
   0  -2 -34  174.58   10.10
   2   0 -34  157.08    9.10
   2  -2  34  175.78   10.30
   0   2  34  174.78   10.50
   2  -2  34  163.78    9.30
   2  -2  34  165.88    9.40
  -2   0  34  157.98   10.60
  -3  -2 -34   92.29    6.30
  -3  -2 -34   89.79    6.80
   2  -5  34   83.19    6.20
  -5   3  34   97.89    7.70
   2  -5  34   86.89    6.00
   3   2  34   95.09    6.40
   2  -5  34   92.19    6.00
  -3   1 -34 1031.90   53.79
  -3   1 -34 1070.09   55.29
   1   2 -34 1050.29   54.19
   2  -3 -34 1068.09   54.59
   2  -3 -34 1127.19   54.69
  -2   3  34 1088.79   55.99
   3  -1  34 1037.80   53.89
  -1  -2  34 1087.79   55.29
  -1  -2  34 1032.20   54.19
  -1  -3 -34  162.88   10.20
  -1  -3 -34  157.28   10.10
   3  -4  34  172.58   10.20
   1   3  34  163.78   10.30
   3  -4  34  155.48    8.50
   3  -4  34  157.68    8.50
  -4  -3 -34   66.29    5.60
  -4  -3 -34   53.79    4.80
   3  -7  34   49.10    4.20
   3  -7  34   63.89    5.10
   3  -7  34   52.89    4.10
  -7   4  34   69.59    7.80
   4   3  34   61.49    5.00
   4  -4 -34  340.07   17.30
  -4   0 -34  307.87   16.70
   0   4 -34  306.67   17.30
  -4   0 -34  328.07   18.40
   4  -4 -34  293.57   16.90
   0  -4  34  329.77   17.90
   0  -4  34  314.17   17.30
   4   0  34  307.37   16.80
  -4   4  34  348.17   19.30
   1  -4 -34  171.08   10.20
   1  -4 -34  159.88   10.10
  -1   4  34  168.98   10.90
  -3  -1  34  153.58   10.60
  -2  -4 -34  175.68   11.40
   4  -6  34  178.78   11.20
  -6   2  34  172.58   12.20
   2   4  34  174.78   11.40
  -5  -4 -34  112.69    9.00
   5   4  34  127.49    8.60
  -9   5  34  112.59   10.00
   4  -9  34  115.29    7.30
   4  -9  34  111.19    8.50
   6  -5 -34    7.00    1.20
  -5  -1 -34    5.30    1.80
  -5  -1 -34    5.50    1.50
   1  -6  34    6.90    1.80
   1  -6  34    5.30    1.80
   5   1  34    8.30    1.60
   1  -6  34    8.70    1.90
  -6   5  34    7.20    2.70
   2   3 -34   87.29    5.10
   3  -5 -34   92.89    6.10
   3  -5 -34   87.29    6.10
  -3   5  34   88.79    7.30
  -2  -3  34   84.79    5.20
   5  -2  34   92.69    6.80
  -2  -3  34   85.89    6.70
   0  -5 -34  417.66   23.00
   5  -5  34  393.26   22.90
  -5   0  34  406.96   23.70
   0   5  34  413.46   23.50
   5  -8  34  102.89    7.70
  -8   3  34  113.99   10.40
   3   5  34   91.59    7.60
  -6  -2 -34  114.79    8.70
   6   2  34  113.59    7.50
   2  -8  34  105.89    7.90
  -8   6  34  117.49    9.70
   2  -8  34  114.69    7.70
   5  -6 -34    5.40    1.40
  -6   1 -34    5.60    1.80
   1   5 -34    7.50    1.50
  -5   6  34    5.60    2.20
  -1  -5  34    4.10    1.20
   2  -6 -34  183.58   11.60
  -2   6  34  187.28   12.50
  -4  -2  34  199.08   12.30
   6  -4  34  166.18   11.70
  -1  -6 -34  102.59    7.70
  -7   1  34  103.19    8.50
   6  -7  34   86.09    7.20
   1   6  34   87.19    7.60
   4   6  34  120.19    9.90
   3 -10  34   16.80    3.30
   7   3  34   27.30    3.80
   3 -10  34   21.20    3.30
  -7   0 -34  121.29    9.70
  -7   0 -34  128.09    7.30
   7  -7 -34  133.89    8.20
   0  -7  34  139.79    9.20
  -7   7  34  133.09   11.20
   0  -7  34  148.69    8.80
  -4   7  34   62.09    6.20
  -3  -4  34   57.69    3.50
   7  -3  34   67.99    5.80
  -3  -4  34   61.39    5.70
   1  -7 -34   83.49    7.10
  -6  -1  34   92.19    7.80
   7  -6  34   88.19    7.20
  -1   7  34   90.49    7.80
   7  -9  34   23.60    4.00
   1  -9  34   34.50    4.40
   1  -9  34   34.10    4.50
   6  -8 -34  120.29    8.00
  -8   2 -34  109.69    8.70
  -2  -6  34  110.99    7.00
  -6   8  34  118.29    9.70
  -2  -6  34  110.29    8.50
   3  -8 -34  108.19    8.20
  -3   8  34  112.09    9.20
   8  -5  34   99.29    9.20
  -5  -3  34  111.19    8.80
   0  -8 -34   12.90    3.20
  -8   0  34   24.40    5.80
   8  -8  34   13.90    3.20
   0   8  34   11.20    3.30
   8  -9 -34   35.40    4.00
  -1  -8  34   28.80    3.80
   5  -9 -34  115.59    8.60
  -5   9  34  110.09    9.90
   9  -4  34  119.19    9.30
  -4  -5  34  127.69    9.50
   2  -9 -34   18.40    3.70
  -2   9  34   29.40    5.30
   7 -10 -34   21.00    3.50
   4 -10 -34   98.59    8.10
   0  -1 -35   -0.40    0.50
   0  -1 -35    0.00    0.60
  -1   1 -35    0.00    0.50
  -1   1 -35   -0.60    0.50
   1   0 -35    0.30    0.60
   0  -1 -35   -0.60    0.60
   1   0 -35    0.20    0.70
  -1   1 -35    0.50    0.70
   1   0 -35    0.50    0.60
  -1   0  35   -1.60    0.90
   0   1  35    1.30    0.90
   1  -1  35    0.30    1.00
   0   2 -35    0.10    0.60
  -2   0 -35    0.50    1.00
   2  -2 -35    0.20    0.60
  -2   0 -35    0.50    1.10
   2  -2 -35   -0.60    0.50
  -2   0 -35    0.20    0.60
   2  -2 -35    0.10    0.90
  -2   2  35    0.40    1.20
   2   0  35    0.60    0.70
   0  -2  35   -0.40    0.70
   0  -2  35    0.10    0.70
   0  -2  35    0.50    1.10
  -1  -2 -35   31.90    3.10
   3  -1 -35   30.60    2.10
  -2   3 -35   33.00    3.80
  -1  -2 -35   36.10    3.90
   3  -1 -35   30.80    2.10
   2  -3  35   26.40    2.50
   2  -3  35   41.00    4.20
  -3   1  35   26.10    3.80
   1   2  35   31.50    3.80
   4  -3 -35   43.10    2.80
  -3  -1 -35   51.79    4.30
  -3  -1 -35   39.90    3.30
  -1   4 -35   41.70    3.60
   4  -3 -35   40.70    2.90
   1  -4  35   41.30    3.50
   1  -4  35   40.30    3.50
   3   1  35   38.50    3.40
   1  -4  35   35.80    3.40
  -4   3  35   49.99    5.00
   1  -3 -35   29.60    3.40
   2   1 -35   30.60    2.20
   2   1 -35   30.70    2.20
   1  -3 -35   33.30    4.00
   1  -3 -35   33.50    3.50
  -2  -1  35   30.10    4.00
  -1   3  35   36.90    4.30
  -2  -1  35   31.50    3.80
   3  -2  35   28.80    2.00
   3  -2  35   31.10    3.70
   3  -2  35   29.50    2.00
  -2  -3 -35   15.60    2.90
  -2  -3 -35   11.50    2.40
   3  -5  35   13.70    1.60
   3  -5  35    9.40    1.40
   3  -5  35   13.40    2.80
  -5   2  35   12.20    3.00
   2   3  35   10.00    2.30
  -4  -2 -35    3.20    1.40
  -4  -2 -35    3.30    1.50
   2  -6  35    4.60    1.30
  -6   4  35    3.50    2.20
   2  -6  35    4.20    1.40
   2  -6  35    5.20    1.70
   4   2  35    6.00    1.60
   3  -4 -35   40.10    3.30
  -4   1 -35   40.10    4.80
   1   3 -35   39.60    3.00
   3  -4 -35   35.00    3.30
  -1  -3  35   42.60    3.30
  -3   4  35   39.80    5.20
  -1  -3  35   45.10    4.10
  -1  -3  35   37.20    3.80
   0  -4 -35    0.00    1.60
  -4   0  35   -1.60    1.10
   4  -4  35    0.00    0.80
   0   4  35    1.10    1.20
  -3  -4 -35    3.70    1.70
  -7   3  35    7.10    2.70
   4  -7  35    4.40    0.90
   3   4  35    5.00    2.10
   4  -7  35    4.60    1.70
   4  -7  35    3.50    0.80
  -5  -3 -35    2.10    1.60
  -8   5  35   11.90    3.60
   5   3  35    7.80    2.10
   3  -8  35    4.10    1.70
   3  -8  35    5.50    1.50
  -5   0 -35   -0.20    0.40
   5  -5 -35   -0.50    0.40
  -5   0 -35   -0.50    0.90
   5  -5 -35    1.40    0.80
   5   0  35    0.20    0.40
   0  -5  35   -0.20    0.50
   0  -5  35    0.40    1.10
   0  -5  35    0.10    0.80
  -5   5  35   -0.90    1.00
   2  -5 -35    9.40    2.00
  -2   5  35   13.90    2.90
   5  -3  35   16.00    2.90
  -3  -2  35   12.40    2.60
  -1  -5 -35   75.09    6.30
   5  -6  35   69.99    6.10
  -6   1  35   82.49    7.20
   1   5  35   76.79    6.50
  -4  -5 -35   26.20    6.30
   5  -9  35   30.00    4.40
   4   5  35   29.20    4.60
   4 -10  35    3.10    1.70
   6   4  35    1.20    1.40
   7  -6 -35   32.60    2.50
   7  -6 -35   35.60    2.60
  -6  -1 -35   26.90    5.00
   1  -7  35   36.00    3.70
   6   1  35   33.20    2.90
  -7   6  35   22.70    4.80
   1  -7  35   35.70    4.10
  -6   2 -35    7.80    2.30
   4  -6 -35    2.80    1.30
   2   4 -35    4.50    1.00
   4  -6 -35    4.00    1.40
  -2  -4  35    2.50    1.50
  -4   6  35    5.80    2.30
  -2  -4  35    6.70    1.20
   1  -6 -35   74.39    6.20
   6  -5  35   77.59    6.40
  -5  -1  35   73.79    6.80
  -1   6  35   80.99    6.90
  -2  -6 -35   -1.10    1.00
  -8   2  35    1.90    2.10
   2   6  35    0.40    1.40
   5   6  35   13.50    3.30
   7   2  35   37.50    3.60
   2  -9  35   30.90    4.30
   2  -9  35   32.20    4.00
  -7   1 -35   52.19    7.60
   1   6 -35   38.40    4.70
   6  -7 -35   35.90    3.80
  -6   7  35   29.10    3.50
  -6   7  35   49.80    6.80
  -1  -6  35   32.00    3.10
  -1  -6  35   39.80    4.80
   3  -7 -35    2.10    1.30
  -4  -3  35    6.70    2.50
  -3   7  35    1.60    1.60
   7  -4  35    2.50    1.70
   0  -7 -35   -0.30    1.00
  -7   0  35   -0.40    1.50
   0   7  35    0.50    1.30
   7  -7  35    0.90    1.50
   3   7  35   -0.70    1.50
   8  -8 -35    0.00    0.90
   0  -8  35    1.40    1.10
   0  -8  35    1.90    1.50
  -8   3 -35    7.70    2.50
   5  -8 -35    4.70    1.70
  -3  -5  35   11.90    2.80
  -3  -5  35    6.50    1.10
  -5   8  35    6.60    2.70
   8  -3  35   10.30    2.70
   2  -8 -35    1.50    1.30
   8  -6  35    1.70    1.40
  -6  -2  35    2.60    2.00
   1   8  35    9.00    3.20
   1 -10  35   -0.70    1.30
   1 -10  35    0.00    1.30
   7  -9 -35   33.20    4.10
  -2  -7  35   29.50    5.00
   4  -9 -35   32.30    4.60
  -4   9  35   23.70    4.70
  -5  -4  35   32.30    4.90
   6 -10 -35   -0.70    1.50
   0   0 -36  130.29    8.40
   0   0 -36  139.39    8.50
   0   0 -36  148.49    8.50
   0   0  36  142.89    8.90
  -1  -1 -36  132.39    8.40
   2  -1 -36  134.49    7.90
  -1   2 -36  145.79    9.30
   2  -1 -36  142.19    7.90
  -1  -1 -36  137.39    8.70
  -1  -1 -36  145.59    8.80
   2  -1 -36  137.89    8.90
   1  -2  36  132.69    8.50
   1  -2  36  130.99    8.20
  -2   1  36  146.59    9.40
   1   1  36  138.49    8.70
   1  -2  36  133.29    8.40
  -2   1 -36  139.69    8.80
   1   1 -36  143.39    8.50
   1  -2 -36  141.19    8.40
   1  -2 -36  134.39    8.80
  -2   1 -36  135.09    7.80
   1  -2 -36  141.79    8.40
   1   1 -36  129.29    7.90
  -2   1 -36  148.69    8.90
   2  -1  36  132.89    8.00
  -1   2  36  146.79    9.30
  -1  -1  36  128.39    8.90
  -1  -1  36  132.19    8.70
  -2   4 -36  174.58   12.00
  -2  -2 -36  183.28   11.30
  -2  -2 -36  200.78   11.80
   2  -4  36  188.08   10.70
   2   2  36  200.78   11.50
   2  -4  36  194.68   11.50
  -4   2  36  198.78   12.60
   2  -4  36  183.08   10.70
   3  -3 -36  731.03   39.40
  -3   0 -36  739.93   39.30
   3  -3 -36  804.32   39.60
  -3   0 -36  850.71   41.50
   0   3 -36  783.02   39.80
   0  -3  36  751.42   40.20
   0  -3  36  769.12   39.80
   3   0  36  735.13   39.40
   0  -3  36  759.02   40.20
   0  -3 -36  167.08    9.50
   0  -3 -36  127.89    9.30
  -3   0  36  147.89   10.00
   3  -3  36  150.48    9.50
   0   3  36  146.79    9.70
  -3  -3 -36   35.80    4.30
  -3  -3 -36   37.80    4.60
  -6   3  36   38.40    5.20
   3  -6  36   32.60    2.70
   3   3  36   37.10    3.70
   3  -6  36   31.00    4.00
   3  -6  36   34.50    2.80
  -1   5 -36   56.79    4.60
  -4  -1 -36   58.99    5.20
   5  -4 -36   57.79    3.70
   5  -4 -36   55.99    3.70
  -4  -1 -36   59.49    4.30
   4   1  36   65.59    4.60
   1  -5  36   65.89    4.80
   1  -5  36   55.29    4.60
   1  -5  36   66.59    4.80
  -5   4  36   60.59    6.00
   2  -4 -36  191.78   11.40
   2   2 -36  177.28   10.30
   2  -4 -36  211.58   11.60
   2   2 -36  204.98   10.30
  -2  -2  36  178.98   12.00
   4  -2  36  197.38   12.00
  -1  -4 -36  199.68   12.00
   1   4  36  183.58   12.00
  -5   1  36  186.68   12.70
   4  -5  36  180.98   11.70
  -4  -4 -36  179.48   12.20
   4  -8  36  190.18   11.80
   4   4  36  182.08   11.70
  -8   4  36  179.58   13.20
   4  -8  36  172.38   10.00
  -5  -2 -36  156.08   10.20
  -5  -2 -36  136.09    9.00
   2  -7  36  134.39    9.20
   2  -7  36  139.69    8.90
   5   2  36  141.39    8.80
  -7   5  36  144.29   11.10
   2  -7  36  144.19    9.20
   1   4 -36   56.69    4.10
   4  -5 -36   64.49    4.60
   4  -5 -36   57.79    4.40
  -5   1 -36   69.39    5.60
  -1  -4  36   56.69    5.00
  -4   5  36   57.49    5.80
  -1  -4  36   61.19    4.20
   1  -5 -36  201.28   11.90
   5  -4  36  184.18   12.00
  -4  -1  36  178.08   12.30
  -1   5  36  191.88   12.50
  -2  -5 -36  138.79    9.70
  -7   2  36  128.39   10.40
   2   5  36  142.89    9.80
   5  -7  36  124.59    9.20
   5   5  36   33.30    4.70
   3  -9  36   54.39    4.60
   3  -9  36   59.49    6.30
   6  -6 -36  165.38    9.90
   6  -6 -36  180.88   10.10
  -6   0 -36  205.48   12.10
   0   6 -36  160.38   10.30
  -6   6  36  176.38   12.50
   0  -6  36  165.78   10.30
   3  -6 -36   43.10    4.50
   6  -3  36   33.30    4.40
  -3   6  36   34.60    5.10
  -3  -3  36   35.80    4.90
   0  -6 -36  220.48   13.50
   6  -6  36  219.48   13.50
   0   6  36  209.08   13.80
  -6   0  36  189.88   13.80
   3   6  36   27.30    4.60
   6  -9  36   27.70    4.30
  -7  -1 -36  141.69   15.50
   1  -8  36  120.09    8.40
   1  -8  36  120.19    8.50
   5  -7 -36  158.28    9.80
   2   5 -36  152.78    8.70
  -7   2 -36  151.88   10.80
  -2  -5  36  157.28   10.60
  -2  -5  36  144.09    8.70
  -5   7  36  167.98   11.80
   2  -7 -36  134.29    9.20
  -2   7  36  141.79   10.20
   7  -5  36  121.29    9.30
  -5  -2  36  124.39    9.70
  -1  -7 -36   25.90    4.50
  -8   1  36   30.40    5.60
   1   7  36   33.10    5.40
   7  -8  36   23.60    4.00
   2 -10  36    3.60    1.80
   2 -10  36    1.30    1.70
   7  -8 -36  116.59    7.80
  -7   8  36   95.29   12.30
  -1  -7  36  127.59    7.80
  -1  -7  36  118.19    8.70
   4  -8 -36  174.78   11.60
  -4  -4  36  187.48   12.50
  -4   8  36  186.08   13.20
   8  -4  36  168.38   12.10
   1  -8 -36   26.00    4.20
  -7  -1  36   35.10    5.70
   8  -7  36   23.60    4.10
  -1   8  36   19.50    4.20
   0  -9  36    9.00    2.90
   0  -9  36    9.90    2.90
   6  -9 -36   61.99    5.30
  -3  -6  36   49.40    6.30
   3  -9 -36   31.60    4.70
  -6  -3  36   43.70    8.60
   5 -10 -36   35.30    4.80
   1  -1 -37   -0.10    0.70
   0   1 -37    0.20    0.60
   1  -1 -37   -0.20    0.50
   0   1 -37   -1.00    0.50
  -1   0 -37    0.40    0.80
  -1   0 -37    0.50    0.80
  -1   0 -37    0.00    0.60
   1  -1 -37    0.50    0.60
   0  -1  37    1.00    1.10
   0  -1  37   -0.20    0.70
  -1   1  37    0.90    1.10
   1   0  37    0.00    0.80
  -2  -1 -37   36.50    4.50
  -2  -1 -37   28.10    2.80
   3  -2 -37   27.20    2.30
  -1   3 -37   31.90    3.50
   3  -2 -37   30.70    2.30
   2   1  37   29.70    3.40
   1  -3  37   27.00    2.70
  -3   2  37   45.70    7.40
   1  -3  37   29.90    3.40
   1  -3  37   34.30    3.10
   0  -2 -37    0.00    0.80
  -2   2 -37    0.00    0.60
   0  -2 -37    0.20    0.70
   2   0 -37   -0.30    0.40
   0  -2 -37    1.20    0.80
   0   2  37   -0.70    0.90
  -2   0  37   -1.60    1.10
   2  -2  37   -0.60    0.70
   2  -2  37   -0.20    0.60
  -3  -2 -37   44.00    3.80
  -3  -2 -37   51.99    5.40
   2  -5  37   40.10    4.40
   3   2  37   39.70    3.70
   2  -5  37   40.60    3.40
  -5   3  37   37.90    5.40
   2  -5  37   37.40    3.30
   1   2 -37   32.50    2.60
   1   2 -37   35.80    4.20
   2  -3 -37   32.50    3.40
   2  -3 -37   25.60    3.00
  -1  -2  37   26.30    3.70
   3  -1  37   29.00    2.30
  -1  -2  37   26.10    3.50
  -2   3  37   36.10    4.70
  -1  -3 -37   18.50    3.00
  -1  -3 -37    8.60    2.10
   1   3  37    6.50    2.00
  -4   1  37    7.40    2.30
  -4  -3 -37   13.20    3.00
   3  -7  37    9.70    1.80
   3  -7  37   11.10    1.90
   4   3  37    8.30    2.10
   3  -7  37   12.30    2.60
  -7   4  37   20.00    4.70
   4  -4 -37    0.60    0.70
  -4   0 -37   -0.20    0.90
   4  -4 -37    0.10    0.60
  -4   0 -37   -0.20    0.40
   0   4 -37    0.50    0.80
  -4   4  37   -0.30    1.20
   4   0  37    0.10    0.60
   0  -4  37    0.60    0.70
   0  -4  37    1.40    1.00
   0  -4  37    2.60    1.20
   1  -4 -37   11.50    2.30
  -3  -1  37   13.30    2.90
   4  -3  37   12.90    2.50
  -2  -4 -37   95.69    7.20
  -6   2  37   92.89    8.10
   4  -6  37   89.49    6.90
   2   4  37   86.19    7.60
   5   4  37    1.40    1.30
   4  -9  37    0.00    1.10
  -5  -1 -37    8.30    2.40
  -5  -1 -37    9.90    1.80
   6  -5 -37   10.30    1.30
   6  -5 -37   12.80    1.40
  -6   5  37   12.30    3.20
   1  -6  37    9.70    2.10
   1  -6  37   16.70    2.60
   1  -6  37    8.30    2.00
   2   3 -37   39.40    2.70
  -5   2 -37   42.20    4.90
   3  -5 -37   38.00    4.20
   2   3 -37   42.60    2.70
   3  -5 -37   41.80    3.70
   5  -2  37   42.20    5.10
  -2  -3  37   50.99    6.30
  -3   5  37   36.70    5.30
   0  -5 -37    0.30    1.20
   0   5  37    1.00    1.30
  -5   0  37   -1.20    1.50
   5  -5  37    1.90    1.30
  -3  -5 -37    1.40    1.50
   5  -8  37    2.40    1.50
  -8   3  37   -0.30    1.70
   3   5  37    0.00    1.20
  -6  -2 -37   25.30    4.10
   6   2  37   25.60    3.20
  -8   6  37   28.10    5.30
   2  -8  37   21.60    3.10
   2  -8  37   26.70    3.70
   1   5 -37    9.50    1.70
  -6   1 -37    9.50    2.50
   5  -6 -37   10.50    2.00
   5  -6 -37   11.10    2.00
  -1  -5  37   13.60    2.70
  -1  -5  37    8.60    1.60
  -5   6  37   12.40    3.50
   2  -6 -37   97.99    7.20
   6  -4  37  105.49    7.70
  -2   6  37   96.79    8.00
  -4  -2  37   86.99    7.60
  -1  -6 -37    4.80    2.20
   1   6  37    5.60    2.20
   6  -7  37    5.20    1.90
  -7   1  37    9.20    3.00
   4   6  37    4.70    2.30
   3 -10  37    1.30    1.50
   7  -7 -37    2.30    1.10
  -7   0 -37   -1.10    1.00
   0  -7  37   -0.60    1.20
  -7   7  37    0.20    1.60
  -7   3 -37   12.90    3.10
   4  -7 -37   17.30    3.00
   7  -3  37   13.90    3.40
  -4   7  37    9.00    2.80
  -3  -4  37    9.60    2.80
   1  -7 -37    9.70    2.60
   7  -6  37    5.20    2.30
  -1   7  37    4.30    2.10
   2   7  37   11.90    3.20
   1  -9  37    8.80    2.30
   1  -9  37   13.30    2.90
  -8   2 -37   31.80    4.80
   6  -8 -37   19.70    3.10
  -2  -6  37   20.40    3.60
  -6   8  37   21.20    4.80
  -2  -6  37   24.70    2.70
   3  -8 -37   -0.10    1.00
  -5  -3  37    0.10    1.60
  -3   8  37    0.30    1.90
   8  -5  37    0.20    1.30
   0   8  37   -1.20    1.20
  -1  -8  37    8.30    2.60
   5  -9 -37    1.10    1.30
  -4  -5  37    4.00    2.20
   7 -10 -37   -0.10    1.20
   0  -1 -38   82.89    5.70
   1   0 -38   77.29    5.30
   0  -1 -38   86.09    5.90
   1   0 -38   75.79    5.30
  -1   1 -38   88.89    5.50
  -1   1 -38   92.09    5.90
  -1   1 -38   87.59    6.00
   1   0 -38   78.99    5.80
   1  -1  38   87.29    5.80
  -1   0  38   72.89    6.20
   1  -1  38   87.69    5.60
   0   1  38   90.09    6.30
  -2   0 -38  491.25   26.80
   0   2 -38  508.15   27.00
   2  -2 -38  503.55   26.90
  -2   0 -38  531.15   27.80
   0   2 -38  508.05   27.10
   2  -2 -38  529.25   27.00
  -2   2  38  528.35   28.50
   0  -2  38  469.45   27.30
   2   0  38  561.14   29.30
   0  -2  38  510.05   27.60
  -1  -2 -38  337.37   19.70
   3  -1 -38  351.96   18.40
  -1  -2 -38  382.26   20.10
   3  -1 -38  354.46   18.40
   2  -3  38  366.26   20.00
   1   2  38  378.46   20.20
   2  -3  38  347.57   18.90
   2  -3  38  353.46   18.90
  -3   1  38  346.17   23.40
   4  -3 -38   89.09    5.50
   4  -3 -38   92.19    5.50
  -1   4 -38   80.99    6.20
  -3  -1 -38   92.59    6.00
  -3  -1 -38   99.29    7.00
   3   1  38   87.39    6.10
   1  -4  38   91.09    6.30
  -4   3  38  104.09    7.90
   1  -4  38   99.79    6.40
   1  -4  38   98.09    6.40
   2   1 -38  348.57   18.20
   1  -3 -38  383.36   19.60
   2   1 -38  339.87   18.30
   1  -3 -38  341.77   19.40
   3  -2  38  339.17   18.00
  -1   3  38  386.96   20.60
   3  -2  38  329.07   20.40
  -2  -1  38  354.96   20.20
  -2  -3 -38    0.90    1.20
  -2  -3 -38   -0.50    0.80
   3  -5  38    1.80    1.10
   2   3  38    0.80    1.00
  -5   2  38   -0.50    1.80
   3  -5  38    1.20    0.60
  -4  -2 -38    4.90    1.60
  -4  -2 -38    4.80    1.80
  -6   4  38   -0.40    1.60
   2  -6  38    4.00    1.50
   2  -6  38    3.40    1.20
   2  -6  38    4.40    1.40
   4   2  38    2.50    1.20
   3  -4 -38   90.69    6.10
   1   3 -38   90.19    5.70
   3  -4 -38   91.09    6.10
  -4   1 -38   91.69    6.90
  -1  -3  38   92.89    6.90
  -1  -3  38   97.09    5.80
  -3   4  38   88.39    7.50
   0  -4 -38  112.99    8.10
  -4   0  38  117.09    8.90
   4  -4  38  122.99    8.40
  -3  -4 -38   46.80    6.40
   4  -7  38   44.20    5.30
   3   4  38   42.90    5.20
  -5  -3 -38   89.99    7.50
   3  -8  38   91.89    6.90
   5   3  38   91.19    6.60
  -8   5  38   81.09    8.50
   3  -8  38   84.69    5.90
   0   5 -38   38.00    3.80
  -5   0 -38   34.50    2.30
   5  -5 -38   38.10    3.00
   5  -5 -38   34.70    2.90
  -5   0 -38   28.90    4.20
   5   0  38   35.80    2.30
   0  -5  38   37.40    4.30
   0  -5  38   36.60    3.20
  -5   5  38   28.90    4.80
   2  -5 -38    1.80    1.20
   5  -3  38    0.20    1.10
  -2   5  38    1.00    1.30
  -3  -2  38   -0.40    1.20
  -1  -5 -38   76.99    6.30
  -6   1  38   59.29    7.30
   1   5  38   64.99    6.00
   5  -6  38   71.19    6.00
   5  -9  38   77.99    6.50
   4   5  38   61.49    6.00
   7  -6 -38   69.19    4.90
  -6  -1 -38   96.09    7.40
  -7   6  38   92.29    8.20
   6   1  38   84.09    6.30
   1  -7  38   98.69    6.50
   4  -6 -38    2.20    1.20
  -6   2 -38    3.00    1.60
  -4   6  38    5.00    2.40
  -2  -4  38    1.40    1.40
  -2  -4  38    3.00    0.90
   1  -6 -38   88.89    6.50
  -5  -1  38   72.39    6.80
   6  -5  38   68.69    6.20
  -1   6  38   62.89    6.40
  -2  -6 -38   34.40    5.10
   6  -8  38   25.80    4.10
   2   6  38   26.80    4.60
   2  -9  38    4.70    2.00
   2  -9  38    5.10    1.80
  -7   1 -38  114.99    8.40
   6  -7 -38  100.09    6.80
  -1  -6  38  100.09    7.70
  -6   7  38  101.69    8.90
  -1  -6  38   95.09    6.50
   3  -7 -38   43.60    5.00
  -3   7  38   38.80    5.60
  -4  -3  38   36.00    5.10
   0  -7 -38   57.69    6.20
   7  -7  38   40.80    5.40
   0   7  38   42.30    6.10
  -7   0  38   44.20    6.30
   0  -8  38   11.40    2.40
   0  -8  38   14.80    3.00
   5  -8 -38   95.09    7.20
  -8   3 -38  113.09    8.60
  -3  -5  38   90.39    7.90
  -5   8  38  100.79    8.90
   2  -8 -38   24.50    6.20
  -2   8  38   28.80    5.30
   8  -6  38   25.10    6.10
  -6  -2  38   36.90    5.70
   7  -9 -38    3.20    1.60
  -2  -7  38    2.70    2.10
   6 -10 -38   20.90    3.60
   0   0 -39    0.70    0.80
   0   0 -39    0.80    0.80
   0   0  39    0.30    0.90
  -1   2 -39    1.90    1.00
  -1  -1 -39    0.10    0.90
   2  -1 -39    0.50    0.70
  -1  -1 -39   -0.40    0.70
  -1   2 -39    0.40    0.80
   1  -2  39    0.80    0.80
   1  -2  39    0.10    0.80
  -2   1  39    1.20    1.40
   1   1  39   -0.40    0.80
   1  -2 -39   -0.40    0.60
   1   1 -39    0.10    0.50
  -2   1 -39   -0.80    0.80
   1  -2 -39   -0.20    0.60
   1   1 -39    0.70    0.70
  -1  -1  39    1.70    1.40
   2  -1  39   -0.50    0.50
  -1   2  39    0.60    1.00
   2  -1  39    0.80    0.70
  -1  -1  39    0.70    0.90
  -2  -2 -39    2.20    1.30
   2  -4  39    1.40    1.10
   2  -4  39    1.20    0.80
   2  -4  39    0.80    0.90
   2   2  39    0.80    1.00
  -4   2  39    2.70    1.90
  -3   0 -39   -0.10    1.00
  -3   0 -39    0.10    0.60
   0   3 -39   -0.40    0.60
   3  -3 -39   -0.20    0.60
   3  -3 -39   -0.70    0.40
   0  -3  39   -0.10    0.70
  -3   3  39    0.30    1.20
   0  -3  39   -0.40    1.00
   0  -3  39    0.30    0.80
   3   0  39   -0.40    0.60
   0  -3 -39    1.70    1.10
   3  -3  39   -0.30    0.80
   0   3  39    1.70    1.50
  -3   0  39    1.50    1.70
  -3  -3 -39    2.70    1.50
   3   3  39    0.30    1.10
  -6   3  39    1.60    2.00
   3  -6  39   -0.20    1.00
   3  -6  39    1.50    0.80
  -4  -1 -39   64.29    4.60
  -4  -1 -39   85.09    6.30
   5  -4 -39   72.69    4.10
   5  -4 -39   65.99    4.00
  -5   4  39   71.39    6.60
   1  -5  39   69.19    5.20
   1  -5  39   55.69    5.30
   4   1  39   65.89    4.70
   1  -5  39   64.79    5.10
  -4   2 -39    3.40    1.60
   2  -4 -39    2.60    1.20
   2   2 -39    1.20    0.50
   2   2 -39    1.80    0.60
  -2   4  39    1.00    1.40
  -1  -4 -39   70.09    6.10
   1   4  39   74.19    6.40
  -5   1  39   76.89    7.10
   4  -5  39   86.19    6.40
  -4  -4 -39   -1.10    1.20
   4   4  39    0.80    1.40
   4  -8  39    1.30    1.40
  -5  -2 -39   16.80    3.50
   2  -7  39   16.40    2.60
   5   2  39   19.20    2.80
   2  -7  39   20.10    3.10
  -7   5  39   16.70    4.10
   4  -5 -39   62.09    4.80
  -5   1 -39   74.79    6.00
   1   4 -39   63.29    4.50
   4  -5 -39   59.59    6.70
  -4   5  39   71.09    6.60
  -1  -4  39   70.69    4.60
   1  -5 -39   69.59    5.70
  -4  -1  39   79.99    6.70
   5  -4  39   59.79    5.70
  -1   5  39   69.09    6.30
  -2  -5 -39    3.80    1.90
   5  -7  39    3.10    1.60
   2   5  39    2.60    1.60
  -7   2  39    4.20    2.50
   5   5  39   -0.80    1.30
   3  -9  39    0.60    1.10
  -6   0 -39    0.80    1.40
   6  -6 -39    0.70    0.80
   0  -6  39   -0.30    1.10
   0  -6  39    1.00    1.00
  -6   6  39    1.70    1.60
   3  -6 -39   -0.20    1.00
  -3  -3  39   -0.10    1.20
  -3   6  39   -0.60    1.20
   6  -3  39   -0.30    1.00
   0  -6 -39    0.10    1.20
   0   6  39   -0.50    1.20
   6  -6  39    0.80    1.10
   1  -8  39    9.00    2.20
   1  -8  39   12.50    2.50
   5  -7 -39   17.40    3.20
  -7   2 -39   21.00    3.80
  -2  -5  39   19.30    3.50
  -5   7  39   20.10    4.40
   2  -7 -39    4.30    1.70
  -2   7  39    2.40    1.80
   7  -5  39    2.70    1.70
  -5  -2  39    6.70    2.80
   1   7  39   25.70    4.60
   7  -8 -39   10.90    2.30
  -1  -7  39    8.30    2.40
   4  -8 -39    0.80    1.20
  -4   8  39    0.90    2.00
  -4  -4  39   -0.10    1.60
   1  -8 -39   28.60    4.50
  -1   8  39   25.50    4.90
   0  -9  39   -1.10    1.40
   6  -9 -39    1.40    1.30
  -3  -6  39    2.10    1.80
   3  -9 -39    3.60    2.00
   5 -10 -39    0.80    1.70
  -1   0 -40    0.80    0.90
   1  -1 -40    0.80    0.80
   1  -1 -40    0.80    0.80
   0   1 -40    1.50    0.90
   0   1 -40    0.40    0.80
  -1   0 -40   -0.10    0.70
   1  -1 -40    1.00    1.00
  -1   1  40   -0.50    1.10
   0  -1  40    0.50    1.00
   0  -1  40    0.50    1.10
   1   0  40    1.80    1.00
   3  -2 -40  202.28   10.40
  -2  -1 -40  193.58   11.60
  -2  -1 -40  191.18   10.90
   3  -2 -40  186.08   10.30
  -1   3 -40  172.58   11.00
  -3   2  40  204.78   12.60
   1  -3  40  174.78   10.80
   1  -3  40  184.38   11.10
   1  -3  40  185.18   11.00
   2   1  40  174.08   11.00
   2   0 -40  259.77   14.40
   2   0 -40  267.67   14.40
   0  -2 -40  284.27   15.60
  -2   2 -40  293.77   15.70
   0  -2 -40  259.97   15.50
   2  -2  40  262.87   14.60
   0   2  40  253.97   15.80
   2  -2  40  265.97   14.70
  -2   0  40  296.27   16.40
  -3  -2 -40   14.60    3.00
   2  -5  40    9.50    2.20
   3   2  40   13.90    2.50
  -5   3  40   18.40    3.90
   2  -5  40   18.20    2.40
   2  -5  40   15.30    2.20
   2  -3 -40  181.38   11.30
   1   2 -40  192.88   10.50
  -3   1 -40  187.28   11.70
   2  -3 -40  204.28   11.20
   1   2 -40  179.58   10.50
  -2   3  40  195.08   12.40
   3  -1  40  181.18   10.10
  -1  -2  40  191.58   11.80
   3  -1  40  184.58   10.20
  -1  -3 -40  172.08   10.60
   1   3  40  161.28   10.60
   3  -4  40  163.88   10.40
  -4   1  40  149.39   11.20
  -4  -3 -40   98.29    7.70
   4   3  40   89.49    6.70
   3  -7  40   89.99    6.90
   3  -7  40   85.89    6.00
  -7   4  40   96.89    8.60
   4  -4 -40  108.39    6.60
   4  -4 -40  119.49    6.80
  -4   0 -40  108.09    6.20
  -4   0 -40  104.19    7.90
   0  -4  40  113.09    7.70
   0  -4  40  111.99    7.10
   0  -4  40  106.89    7.60
  -4   4  40  110.99    8.80
   4   0  40  104.99    6.30
   1  -4 -40  181.58   13.30
  -1   4  40  159.28   11.10
   4  -3  40  150.58   10.60
  -3  -1  40  178.18   11.40
  -2  -4 -40   34.50    4.60
  -6   2  40   23.40    4.40
   4  -6  40   28.90    4.00
   2   4  40   32.10    4.50
   4  -9  40   46.90    5.80
   5   4  40   44.30    4.60
  -5  -1 -40  193.28   15.40
   6  -5 -40  161.38    9.30
   1  -6  40  189.08   11.60
   1  -6  40  186.58   11.00
   5   1  40  178.68   10.70
  -6   5  40  168.18   15.60
   2   3 -40   15.50    1.40
   2   3 -40   14.70    1.30
  -5   2 -40   12.50    2.70
   3  -5 -40   14.60    2.50
  -3   5  40   20.50    3.80
  -2  -3  40   15.10    3.10
   0  -5 -40  109.79    7.90
  -5   0  40  107.39    8.70
   0   5  40   94.39    7.90
   5  -5  40   99.79    7.70
   5  -8  40   96.89    8.00
   3   5  40  113.79    8.40
   2  -8  40   30.10    3.90
   2  -8  40   33.20    4.30
   5  -6 -40  191.18   10.80
  -6   1 -40  159.28   12.70
  -1  -5  40  174.58   10.40
  -1  -5  40  190.38   11.80
   2  -6 -40   28.10    3.90
  -4  -2  40   20.40    3.90
   6  -4  40   30.90    4.40
  -2   6  40   29.30    4.60
  -1  -6 -40  126.49    9.70
   6  -7  40  132.19    9.70
  -7   1  40  141.69   10.90
   1   6  40  128.19    9.90
   4   6  40    8.70    2.60
   0  -7  40   70.69    5.90
   0  -7  40   61.29    5.00
  -7   3 -40   86.79    7.60
   4  -7 -40   91.29    6.90
  -3  -4  40  103.89    8.00
  -4   7  40   91.49    8.30
   7  -6  40  150.38   10.40
  -6  -1  40  131.09   10.70
   2   7  40   13.20    3.60
   6  -8 -40   38.80    4.40
  -2  -6  40   34.90    5.60
   3  -8 -40  113.29    8.40
  -5  -3  40  100.29    8.80
  -3   8  40  104.49    9.30
  -1  -8  40    3.90    2.10
   5  -9 -40   41.50    5.10
   0  -1 -41    1.00    0.90
   0  -1 -41    0.60    0.80
   1   0 -41    1.10    0.80
  -1   1 -41    0.30    0.80
  -1   1 -41   -0.70    0.60
   0  -1 -41    1.00    0.90
   1   0 -41    0.80    0.60
   1  -1  41   -0.10    0.80
   1  -1  41   -0.50    0.60
   0   1  41    0.10    0.90
  -1   0  41   -0.90    0.90
  -2   0 -41    0.10    0.60
   2  -2 -41   -0.10    0.60
   0   2 -41   -0.10    0.70
   2  -2 -41    0.00    0.60
   0   2 -41   -0.20    0.60
  -2   0 -41    0.60    0.90
   2   0  41   -0.50    0.60
   0  -2  41    0.00    0.70
  -2   2  41    0.90    1.20
   0  -2  41   -0.40    1.00
  -1  -2 -41   35.10    3.50
   3  -1 -41   39.20    2.40
   3  -1 -41   32.50    2.30
  -1  -2 -41   36.10    4.30
   2  -3  41   36.90    2.90
  -3   1  41   41.50    5.10
   1   2  41   36.60    4.40
   2  -3  41   37.80    4.20
   2  -3  41   32.90    2.80
  -3  -1 -41    1.20    0.90
  -3  -1 -41    1.80    1.20
   4  -3 -41    1.40    0.70
   4  -3 -41    3.00    1.10
   1  -4  41    0.30    0.90
   1  -4  41   -0.20    1.00
  -4   3  41   -0.20    1.20
   1  -4  41   -0.20    0.70
   3   1  41    1.80    1.00
  -3   2 -41   37.50    4.50
   2   1 -41   31.60    2.50
   2   1 -41   35.80    2.40
   1  -3 -41   35.80    3.90
  -1   3  41   37.90    5.50
  -2  -3 -41   40.10    4.70
   3  -5  41   35.90    4.50
   2   3  41   29.70    4.00
  -5   2  41   36.20    5.60
  -4  -2 -41   54.29    8.60
   2  -6  41   45.00    4.20
   4   2  41   41.80    3.80
   2  -6  41   46.40    3.90
   1   3 -41    1.00    0.70
   1   3 -41    0.70    0.70
   3  -4 -41    0.60    0.80
  -4   1 -41    1.10    1.40
   3  -4 -41    2.50    1.10
  -3   4  41   -0.20    1.20
  -1  -3  41   -0.50    1.10
   0  -4 -41   -1.00    0.80
  -4   0  41   -0.70    1.40
   4  -4  41    0.00    1.20
   0   4  41   -1.60    1.00
  -3  -4 -41    2.40    1.70
  -7   3  41    3.00    2.20
   3   4  41    2.50    1.60
   4  -7  41    4.30    1.90
   5   3  41    4.00    1.60
   3  -8  41    4.40    1.70
  -5   0 -41    0.50    1.20
   5  -5 -41    1.90    0.90
   0   5 -41    1.80    1.20
  -5   5  41    1.80    1.80
   0  -5  41    1.60    1.40
   0  -5  41    0.80    0.80
   2  -5 -41   46.20    4.80
  -3  -2  41   32.10    4.70
   5  -3  41   44.60    5.20
  -2   5  41   30.70    4.80
  -1  -5 -41    0.80    1.20
   1   5  41    3.30    1.90
   5  -6  41    1.00    1.30
  -6   1  41   -0.20    2.20
   4   5  41   12.40    3.00
   1  -7  41    2.10    1.20
   1  -7  41    3.20    1.60
   4  -6 -41   41.30    3.90
   2   4 -41   40.10    2.60
  -2  -4  41   40.80    5.20
  -4   6  41   39.00    5.70
   1  -6 -41    1.80    1.40
  -5  -1  41    1.10    1.70
  -1   6  41    1.40    1.70
   2   6  41   27.60    4.70
   2  -9  41    4.40    1.80
   6  -7 -41    1.20    1.00
  -1  -6  41    1.40    1.60
   3  -7 -41    2.70    1.50
   7  -4  41    3.60    1.90
  -3   7  41    3.20    2.20
  -4  -3  41    3.70    2.10
   0  -7 -41   -1.00    1.20
   0   7  41    0.10    1.60
   0  -8  41   -0.80    1.40
   5  -8 -41    1.80    1.40
  -3  -5  41    1.80    1.90
   2  -8 -41   26.70    4.10
   4  -9 -41    9.10    2.70
   6 -10 -41    3.50    2.80
   0   0 -42   28.30    2.90
   0   0 -42   26.70    3.20
   0   0 -42   28.60    3.30
   0   0  42   29.20    3.80
   2  -1 -42  290.67   15.70
   2  -1 -42  291.27   15.70
  -1  -1 -42  273.47   16.30
  -1   2 -42  310.27   16.50
   1  -2  42  280.57   16.20
   1  -2  42  283.27   16.10
   1   1  42  302.57   16.70
  -2   1  42  296.07   17.60
   1  -2 -42  287.47   16.50
   1  -2 -42  291.67   16.50
  -2   1 -42  306.97   17.10
   1   1 -42  276.87   16.00
   1   1 -42  307.37   16.00
  -1   2  42  309.87   17.60
  -1  -1  42  309.27   17.40
   2  -1  42  285.87   16.00
   2  -1  42  289.37   17.00
  -2  -2 -42  145.79    9.40
  -2  -2 -42  130.09    8.60
   2  -4  42  126.09    7.90
   2   2  42  132.69    8.80
   2  -4  42  144.69    8.30
  -4   2  42  139.89   10.20
   2  -4  42  132.79    8.90
   3  -3 -42   93.19    5.90
  -3   0 -42   88.79    5.50
  -3   0 -42   94.59    6.90
   3  -3 -42   90.09    5.80
   0   3 -42   90.29    6.00
   0  -3  42   85.79    6.40
  -3   3  42   94.19    7.60
   3   0  42   93.49    5.80
   0  -3  42   90.39    6.70
   0  -3 -42  674.13   35.80
   3  -3  42  648.04   35.80
   0   3  42  716.53   39.50
  -3   0  42  646.44   36.60
  -6   3  42   28.70    4.90
   3  -6  42   22.80    3.50
   3   3  42   26.30    3.70
  -4  -1 -42  104.79    8.00
   5  -4 -42  101.59    5.80
  -5   4  42  102.59    8.70
   4   1  42  114.69    6.80
   1  -5  42   97.39    7.10
   1  -5  42  102.29    7.20
   1  -5  42  113.99    8.90
   2   2 -42  130.99    7.40
  -4   2 -42  139.89    9.40
   2   2 -42  134.69    7.30
   2  -4 -42  144.89    8.90
  -2   4  42  144.09   10.10
  -2  -2  42  129.09    9.50
  -1  -4 -42   42.30    5.10
   1   4  42   35.70    4.80
  -5   1  42   33.80    5.30
   4  -5  42   38.80    4.80
   4  -8  42   93.09    7.40
   4   4  42   92.89    7.20
   2  -7  42   94.89    7.10
   2  -7  42   94.39    6.60
   4  -5 -42   96.79    7.50
  -5   1 -42   96.39    7.60
   4  -5 -42   96.29    6.60
  -1  -4  42   93.79    6.20
  -1  -4  42  108.09    7.70
  -4   5  42  111.39    8.70
   1  -5 -42   34.50    4.50
  -1   5  42   44.30    5.60
   5  -4  42   28.00    4.20
  -4  -1  42   32.80    5.00
  -2  -5 -42   32.80    4.70
  -7   2  42   34.60    6.90
   2   5  42   30.40    4.50
   5  -7  42   31.30    4.50
   3  -9  42   19.60    3.40
  -6   0 -42  135.99    9.80
  -6   6  42  131.49   10.70
   0  -6  42  127.49    9.10
   0  -6  42  130.59    8.30
   3  -6 -42   22.90    3.30
  -6   3 -42   26.10    4.70
  -3  -3  42   23.60    4.00
  -3   6  42   17.90    3.90
   0  -6 -42   27.20    5.00
   6  -6  42   22.10    3.80
   0   6  42   30.80    4.80
  -6   0  42   26.40    4.80
   3   6  42   43.40    5.80
   1  -8  42    6.20    2.70
   5  -7 -42  100.69    7.10
  -2  -5  42   96.29    8.00
  -5   7  42  103.59    9.30
   2  -7 -42   39.40    4.90
  -2   7  42   33.50    5.40
   7  -5  42   28.10    5.20
  -5  -2  42   36.20    5.40
   1   7  42   43.60    6.20
  -1  -7  42    3.10    2.20
   4  -8 -42  115.59    8.30
  -4  -4  42  100.29    8.80
  -1   0 -43   -0.10    0.60
   1  -1 -43    0.50    0.80
   1  -1 -43   -0.40    0.60
  -1   0 -43    0.10    0.90
   0   1 -43    0.20    0.70
   0   1 -43   -0.10    0.70
  -1   1  43   -0.10    1.10
   1   0  43    0.50    0.80
   0  -1  43    1.00    1.00
   0  -1  43    1.10    0.90
  -2  -1 -43   15.70    2.30
   3  -2 -43   16.60    1.90
   3  -2 -43   15.50    1.90
  -1   3 -43   17.90    2.70
  -2  -1 -43   22.40    3.30
   1  -3  43   15.60    2.40
   1  -3  43   13.00    2.30
   2   1  43   18.10    2.70
  -3   2  43   14.40    3.30
   1  -3  43   17.10    2.60
   0  -2 -43   -0.90    0.80
  -2   2 -43   -0.90    0.90
   2   0 -43   -0.20    0.50
   2   0 -43    0.20    0.50
   2  -2  43    0.50    0.70
  -2   0  43   -1.80    1.30
   0   2  43    0.60    1.20
   2  -2  43    0.50    0.70
  -3  -2 -43   11.10    2.70
   3   2  43    6.60    1.80
   2  -5  43    5.50    1.80
  -5   3  43    8.90    2.90
   2  -5  43   10.40    1.80
   1   2 -43   18.90    2.20
   2  -3 -43   14.90    2.40
   1   2 -43   15.80    2.10
   2  -3 -43   22.30    2.90
  -3   1 -43   20.90    3.40
   3  -1  43   14.20    1.50
  -1  -2  43   19.80    3.30
  -2   3  43   22.20    3.90
   3  -1  43   15.10    1.70
  -1  -3 -43   11.80    2.50
  -4   1  43   19.70    3.60
   3  -4  43   15.80    2.90
   1   3  43   12.70    2.70
   3  -7  43    0.60    1.20
   4   3  43    0.00    1.10
   0   4 -43    0.10    0.80
   4  -4 -43    0.70    0.80
  -4   0 -43   -1.30    0.70
   4   0  43    0.60    0.50
  -4   4  43   -1.00    1.20
   0  -4  43   -0.60    0.60
   0  -4  43   -1.60    0.90
  -4   3 -43   17.10    3.10
   1  -4 -43   15.60    2.70
  -1   4  43   16.00    3.40
  -3  -1  43   17.00    3.50
   4  -3  43   18.80    3.30
  -2  -4 -43    1.50    1.70
   2   4  43    0.40    1.10
  -6   2  43    5.70    2.80
   4  -6  43    2.00    1.50
  -5  -1 -43   26.20    4.10
   1  -6  43   24.60    3.30
   1  -6  43   24.80    3.40
  -6   5  43   27.90    5.00
   3  -5 -43    8.40    2.00
  -5   2 -43    8.00    2.30
  -2  -3  43   10.60    2.80
  -3   5  43    7.70    2.70
   0  -5 -43    1.40    1.40
   0   5  43   -0.10    1.30
   5  -5  43   -0.80    0.90
  -5   0  43   -0.40    1.60
   3   5  43    0.60    1.30
   2  -8  43   -0.20    1.10
   5  -6 -43   29.60    3.30
  -6   1 -43   32.00    4.60
  -1  -5  43   29.20    4.20
  -5   6  43   24.30    4.70
   2  -6 -43    4.00    1.80
  -4  -2  43    0.30    1.90
  -2   6  43   -0.10    1.40
   6  -4  43    0.30    1.20
   1   6  43   31.30    5.80
   0  -7  43    0.60    1.50
   4  -7 -43   -0.40    0.90
  -3  -4  43   -0.10    1.70
  -4   7  43    2.80    2.20
   1  -7 -43   20.20    3.80
  -1   7  43   37.60    5.70
  -2  -6  43    0.50    1.50
   3  -8 -43    3.00    1.80
   5  -9 -43   21.20    3.70
   0  -1 -44   63.29    4.90
  -1   1 -44   74.39    5.20
   1   0 -44   58.59    4.50
   1   0 -44   70.19    4.60
   0   1  44   64.49    5.40
   1  -1  44   58.49    4.70
  -1   0  44   64.79    5.60
   1  -1  44   63.09    4.90
   2  -2 -44    8.90    1.70
   2  -2 -44    8.40    1.70
  -2   0 -44    6.40    1.40
   0   2 -44   11.00    1.90
  -2   0 -44    5.70    1.80
   0   2 -44    4.70    1.40
   0  -2  44    9.80    2.20
   0  -2  44    5.70    1.70
   2   0  44    7.20    1.60
  -2   2  44    7.10    2.30
   3  -1 -44  264.77   14.80
   3  -1 -44  286.57   14.90
  -1  -2 -44  316.47   17.00
  -2   3 -44  305.77   16.70
   2  -3  44  275.67   15.50
  -3   1  44  325.87   18.10
   2  -3  44  276.97   15.50
   1   2  44  288.67   16.80
   2  -3  44  281.27   16.60
  -3  -1 -44   22.80    3.70
   4  -3 -44   24.90    2.00
  -4   3  44   26.00    4.40
   1  -4  44   29.40    3.60
   1  -4  44   26.10    3.30
   3   1  44   22.00    2.80
   1  -3 -44  305.97   17.60
  -3   2 -44  315.07   17.40
   2   1 -44  310.27   16.10
   2   1 -44  284.67   15.40
  -1   3  44  273.07   17.60
  -2  -1  44  278.07   17.60
  -2  -3 -44   84.49    6.60
   2   3  44   72.69    6.10
   3  -5  44   73.29    6.10
  -5   2  44   75.39    7.30
  -4  -2 -44  143.69    9.90
   2  -6  44  128.09    8.90
   2  -6  44  120.89    8.80
   4   2  44  141.09    8.50
  -6   4  44  132.69   10.60
   3  -4 -44   24.80    4.10
  -4   1 -44   29.70    4.20
   3  -4 -44   24.70    3.00
   1   3 -44   24.90    2.30
  -3   4  44   26.50    4.50
  -1  -3  44   21.20    3.70
   0  -4 -44  204.98   12.50
   0   4  44  185.38   12.70
  -4   0  44  201.08   13.40
   4  -4  44  192.58   12.50
   3   4  44   79.09    6.30
   4  -7  44   65.89    7.50
   3  -8  44   44.70    5.20
  -5   0 -44  173.28   11.80
   5  -5 -44  178.18   10.30
   0  -5  44  156.78   11.00
   0  -5  44  181.68   10.50
  -5   5  44  187.18   13.00
   2  -5 -44   78.39    6.00
  -5   3 -44   73.79    6.40
  -2   5  44   72.19    6.80
  -3  -2  44   68.99    6.60
  -1  -5 -44   37.20    5.30
   1   5  44   40.00    6.70
  -6   1  44   49.80    6.70
   5  -6  44   40.90    5.20
   1  -7  44   37.00    4.30
   4  -6 -44  123.29    9.00
  -6   2 -44  140.59    9.90
  -2  -4  44  133.09    9.60
  -4   6  44  127.69   10.40
   1  -6 -44   43.30    5.20
  -1   6  44   36.00    7.70
  -5  -1  44   30.00    5.00
   6  -5  44   36.80    4.90
   2   6  44   70.19    6.70
  -1  -6  44   46.20    5.60
   3  -7 -44   73.39    6.20
  -3   7  44   67.99    8.50
  -4  -3  44   71.69    7.00
   0   7  44  103.69   13.80
   5  -8 -44   43.20    5.10
  -3  -5  44   46.20    6.10
   0   0 -45    0.00    0.70
   0   0 -45   -0.10    0.80
   0   0  45    0.40    1.00
  -1   2 -45   15.80    2.50
  -1  -1 -45   11.10    2.30
   2  -1 -45   13.50    1.90
   2  -1 -45   12.10    1.90
  -1  -1 -45    7.70    1.90
   1  -2  45   10.30    2.00
  -2   1  45    8.60    2.60
   1   1  45   13.20    2.60
   1  -2  45   10.00    1.90
  -2   1 -45   11.40    2.40
   1   1 -45   13.30    1.90
   1  -2 -45   10.10    2.10
   1   1 -45    8.70    1.70
  -1  -1  45   11.60    2.60
   2  -1  45   11.30    1.90
  -1   2  45   13.60    3.00
   2  -1  45   10.80    3.00
  -2  -2 -45    8.60    2.40
   2  -4  45   13.40    2.00
  -4   2  45    7.60    2.70
   2  -4  45   12.60    2.50
   2   2  45   10.40    2.20
   0   3 -45    0.30    0.80
   3  -3 -45    0.00    0.70
  -3   0 -45    0.20    1.00
  -3   3  45   -0.10    1.30
   3   0  45   -0.20    0.60
   0  -3  45   -1.70    0.80
   0  -3 -45    0.20    1.00
  -3   3 -45    0.10    1.10
   0   3  45    0.20    1.30
  -3   0  45   -0.10    1.50
  -3  -3 -45    1.50    1.60
  -6   3  45    3.80    2.30
   3   3  45    1.90    1.60
   3  -6  45    2.70    1.60
  -4  -1 -45    8.20    2.40
  -5   4  45    8.80    2.70
   1  -5  45    7.90    2.00
   1  -5  45    7.80    1.90
  -4   2 -45   14.70    3.00
  -2   4  45   14.70    3.40
  -2  -2  45   13.30    3.00
  -1  -4 -45    4.00    1.60
  -5   1  45    4.10    2.70
   1   4  45    2.70    1.70
   4  -5  45    5.80    2.00
   4  -8  45   33.40    6.70
   2  -7  45    3.40    1.60
  -5   1 -45    7.40    2.40
   4  -5 -45    9.90    1.90
   1   4 -45    9.80    1.80
  -4   5  45    6.80    2.60
  -1  -4  45    7.60    2.40
   1  -5 -45    4.40    1.80
   5  -4  45    4.00    2.70
  -4  -1  45    3.40    2.10
  -1   5  45    2.70    2.00
   2   5  45    5.40    2.10
   5  -7  45    7.80    2.40
   0  -6  45   -0.70    1.20
  -6   3 -45    2.00    1.80
   3  -6 -45    0.70    1.20
  -3  -3  45    3.10    2.20
  -3   6  45    1.80    1.80
   0  -6 -45   -0.70    1.30
   0   6  45   -0.40    1.50
   2  -7 -45    6.00    2.20
  -1  -7  45    4.60    2.40
   1  -1 -46  178.08   10.80
   0   1 -46  187.98   10.80
   0   1 -46  183.08   11.00
   1  -1 -46  191.18   10.80
  -1   0 -46  187.18   11.30
   0  -1  46  184.18   11.40
   1   0  46  183.18   11.10
   0  -1  46  167.08   13.30
  -1   1  46  169.58   11.70
  -2  -1 -46    8.80    2.20
  -1   3 -46    7.70    1.80
   3  -2 -46    8.30    1.50
  -3   2  46    9.10    2.60
   2   1  46    7.10    1.80
   1  -3  46   10.60    1.90
   0  -2 -46  275.07   16.30
   2   0 -46  280.57   15.10
  -2   2 -46  312.87   16.60
  -2   0  46  279.57   17.20
   2  -2  46  269.77   15.30
  -3  -2 -46   66.19    5.80
   3   2  46   58.49    4.80
   2  -5  46   59.19    5.20
  -5   3  46   52.49    7.10
   1   2 -46    6.70    1.30
  -3   1 -46    6.40    2.10
   2  -3 -46   11.10    2.10
  -1  -2  46    4.30    2.00
  -2   3  46   11.40    2.80
  -1  -3 -46  104.79    7.30
  -4   1  46   94.29    8.00
   3  -4  46   83.79    6.80
   1   3  46   83.29    6.90
  -4   0 -46   29.40    5.10
   0   4 -46   32.60    3.40
   4  -4 -46   27.70    2.90
   0  -4  46   29.30    4.10
   1  -4 -46   93.99    7.20
  -4   3 -46  107.29    7.80
  -3  -1  46   96.09    8.10
  -1   4  46   98.99    8.00
  -2  -4 -46    9.10    2.60
   2   4  46   12.00    2.80
   4  -6  46    8.90    3.10
   1  -6  46  107.09    7.50
   3  -5 -46   55.29    4.70
  -5   2 -46   55.39    6.30
  -2  -3  46   57.69    5.80
   5  -5  46   -0.50    1.10
   0   5  46    0.70    1.50
  -5   0  46   -2.10    1.40
  -1  -5  46  110.99    8.50
  -6   4 -46    9.10    3.00
   2  -6 -46   10.60    2.60
  -2   6  46   11.30    3.20
  -4  -2  46    8.70    3.00
   1   6  46   14.10    3.30
   4  -7 -46   46.70    5.20
  -3  -4  46   44.20    5.90
   3  -8 -46   17.40    3.80
  -1   1 -47    0.20    0.90
   1   0 -47   -0.10    0.60
   0  -1 -47   -0.40    0.90
  -1   0  47    2.40    1.50
   0   1  47   -0.90    1.10
   1  -1  47    0.00    0.80
   2  -2 -47   -0.70    0.60
  -2   0 -47    0.30    1.00
   0   2 -47   -0.60    0.60
   0  -2  47    0.70    1.10
  -2   2  47   -0.50    1.10
   2   0  47   -0.20    0.70
  -2   3 -47   11.70    2.40
  -1  -2 -47   14.00    2.80
   1   2  47   20.30    3.30
   2  -3  47   13.90    1.90
  -3   1  47   14.70    3.30
  -1   4 -47   11.90    2.90
  -3  -1 -47   16.50    4.00
  -4   3  47   17.30    4.70
   3   1  47    6.70    1.70
   1  -4  47    7.10    1.90
  -3   2 -47   21.00    3.30
   1  -3 -47   17.00    2.80
  -2  -1  47   17.50    3.30
  -1   3  47    8.70    2.60
  -2  -3 -47    5.30    2.10
   2   3  47    3.70    1.80
  -5   2  47    6.50    2.80
   3  -5  47    4.00    1.70
   2  -6  47   -0.10    0.90
   3  -4 -47    9.70    1.90
  -3   4  47    9.40    2.80
  -1  -3  47   10.20    2.70
   0  -4 -47    0.70    1.20
  -4   4 -47    0.80    1.20
   0   4  47    0.80    1.40
   4  -4  47   -0.30    1.00
  -4   0  47    2.10    2.20
   4  -7  47    0.40    1.30
   0  -5  47   -0.50    1.50
  -5   3 -47    3.20    1.70
   2  -5 -47    3.00    1.70
  -3  -2  47    1.20    1.90
  -2   5  47    0.80    1.90
   1   5  47   22.10    4.00
   5  -6  47   27.80    5.00
   4  -6 -47    0.30    1.20
  -2  -4  47   -0.20    1.60
   1  -6 -47   18.60    3.40
  -1   6  47   24.40    4.40
   3  -7 -47   -0.50    1.40
   0   0 -48  233.68   13.50
   0   0  48  229.58   14.00
   2  -1 -48   37.20    3.10
  -1  -1 -48   40.40    4.70
  -1   2 -48   34.60    4.00
  -2   1  48   36.50    5.00
   1   1  48   43.20    4.10
   1  -2  48   41.90    3.70
   1   1 -48   43.30    3.30
  -2   1 -48   44.60    4.90
   1  -2 -48   41.30    4.50
   2  -1  48   39.20    3.50
  -1  -1  48   43.90    5.20
  -1   2  48   38.60    5.20
  -2   4 -48   45.70    4.40
  -2  -2 -48   48.20    5.70
   2   2  48   51.39    4.50
   0   3 -48    4.30    1.40
  -3   0 -48    5.60    2.00
   3  -3 -48    1.80    1.00
   0  -3  48    2.50    1.50
  -3   3  48    3.90    2.20
  -3   3 -48  113.29    7.90
   0  -3 -48  104.49    7.70
  -3   0  48  111.89    8.70
   0   3  48  100.19    8.00
   3  -6  48  102.49    8.60
   1  -5  48   95.69    7.00
  -5   4  48  121.89   14.70
   2  -4 -48   48.60    4.30
  -2   4  48   44.60    6.00
  -2  -2  48   41.40    5.30
  -1  -4 -48   50.29    5.80
  -5   1  48   57.59    7.10
   1   4  48   48.90    6.00
   4  -5  48   46.10    5.80
  -4   5  48  105.09    9.00
  -1  -4  48  100.09    8.00
  -5   4 -48   49.80    6.00
   1  -5 -48   50.39    5.50
  -4  -1  48   52.79    6.50
   3  -6 -48   96.09    7.40
  -3  -3  48  101.39    8.50
   0   6  48   20.10    4.00
  -2  -5  48   18.80    4.00
   2  -7 -48   36.20    5.30
  -1   0 -49    1.20    1.10
   1  -1 -49    0.30    0.80
   0   1 -49    0.70    0.90
   0  -1  49    0.80    1.10
  -1   1  49    0.10    1.00
   1   0  49    0.50    1.10
  -1   3 -49   12.60    2.40
  -2  -1 -49    9.60    2.50
   1  -3  49   13.60    2.50
  -3   2  49   14.30    3.40
   2   1  49   12.80    2.40
  -2   2 -49   -1.00    0.90
   0  -2 -49   -0.60    1.00
  -2   0  49    1.40    1.30
   0   2  49    0.40    1.20
  -3  -2 -49   11.10    3.30
[truncated: 3,731 more chars]
