# Supplementary material
Source: MDPI journal article supplement (https://www.mdpi.com/2304-6740/11/1/25)
Supplement: s1 [file s1 › NK6941__20210608_s4_d1-2_autoTwinAbs_250K_FIN.cif]

data_NK6941__20210608_s4_d1-2_autotwinabs_250k
_audit_creation_date               2022-04-18
_audit_creation_method
;
Olex2 1.3
(compiled 2020.11.12 svn.r5f609507 for OlexSys, GUI svn.r6408)
;
_shelx_SHELXL_version_number       '2014/7'
_audit_contact_author_address      ?
_audit_contact_author_email        ?
_audit_contact_author_name         ''
_audit_contact_author_phone        ?
_publ_contact_author_id_orcid      ?
_publ_section_references
;
Dolomanov, O.V., Bourhis, L.J., Gildea, R.J, Howard, J.A.K. & Puschmann, H.
 (2009), J. Appl. Cryst. 42, 339-341.

Sheldrick, G.M. (2015). Acta Cryst. A71, 3-8.

Sheldrick, G.M. (2015). Acta Cryst. C71, 3-8.
;
_chemical_name_common              ?
_chemical_name_systematic          ?
_chemical_formula_moiety           'Cl6 Pb1 2-, (C3 H10 N1 1+)2, Cl2'
_chemical_formula_sum              'C6 H20 Cl8 N2 Pb'
_chemical_formula_weight           611.03
_chemical_melting_point            ?
loop_
  _atom_type_symbol
  _atom_type_description
  _atom_type_scat_dispersion_real
  _atom_type_scat_dispersion_imag
  _atom_type_scat_source
 'C' 'C' 0.0033 0.0016 'International Tables Vol C Tables 4.2.6.8 and 6.1.1.4'
 'H' 'H' 0.0000 0.0000 'International Tables Vol C Tables 4.2.6.8 and 6.1.1.4'
 'Cl' 'Cl' 0.1484 0.1585 'International Tables Vol C Tables 4.2.6.8 and 6.1.1.4'
 'N' 'N' 0.0061 0.0033 'International Tables Vol C Tables 4.2.6.8 and 6.1.1.4'
 'Pb' 'Pb' -3.3944 10.1111
 'International Tables Vol C Tables 4.2.6.8 and 6.1.1.4'

_shelx_space_group_comment
;
The symmetry employed for this shelxl refinement is uniquely defined
by the following loop, which should always be used as a source of
symmetry information in preference to the above space-group names.
They are only intended as comments.
;
_space_group_crystal_system        'trigonal'
_space_group_IT_number             167
_space_group_name_H-M_alt          'R -3 c'
_space_group_name_Hall             '-R 3 2"c'
loop_
  _space_group_symop_operation_xyz
 'x, y, z'
 '-y, x-y, z'
 '-x+y, -x, z'
 'y, x, -z+1/2'
 'x-y, -y, -z+1/2'
 '-x, -x+y, -z+1/2'
 'x+2/3, y+1/3, z+1/3'
 '-y+2/3, x-y+1/3, z+1/3'
 '-x+y+2/3, -x+1/3, z+1/3'
 'y+2/3, x+1/3, -z+5/6'
 'x-y+2/3, -y+1/3, -z+5/6'
 '-x+2/3, -x+y+1/3, -z+5/6'
 'x+1/3, y+2/3, z+2/3'
 '-y+1/3, x-y+2/3, z+2/3'
 '-x+y+1/3, -x+2/3, z+2/3'
 'y+1/3, x+2/3, -z+7/6'
 'x-y+1/3, -y+2/3, -z+7/6'
 '-x+1/3, -x+y+2/3, -z+7/6'
 '-x, -y, -z'
 'y, -x+y, -z'
 'x-y, x, -z'
 '-y, -x, z-1/2'
 '-x+y, y, z-1/2'
 'x, x-y, z-1/2'
 '-x+2/3, -y+1/3, -z+1/3'
 'y+2/3, -x+y+1/3, -z+1/3'
 'x-y+2/3, x+1/3, -z+1/3'
 '-y+2/3, -x+1/3, z-1/6'
 '-x+y+2/3, y+1/3, z-1/6'
 'x+2/3, x-y+1/3, z-1/6'
 '-x+1/3, -y+2/3, -z+2/3'
 'y+1/3, -x+y+2/3, -z+2/3'
 'x-y+1/3, x+2/3, -z+2/3'
 '-y+1/3, -x+2/3, z+1/6'
 '-x+y+1/3, y+2/3, z+1/6'
 'x+1/3, x-y+2/3, z+1/6'

_cell_length_a                     9.5183(2)
_cell_length_b                     9.5183(2)
_cell_length_c                     37.3034(8)
_cell_angle_alpha                  90
_cell_angle_beta                   90
_cell_angle_gamma                  120
_cell_volume                       2926.83(14)
_cell_formula_units_Z              6
_cell_measurement_reflns_used      9864
_cell_measurement_temperature      250(2)
_cell_measurement_theta_max        30.80
_cell_measurement_theta_min        2.70
_shelx_estimated_absorpt_T_max     0.323
_shelx_estimated_absorpt_T_min     0.323
_exptl_absorpt_coefficient_mu      9.726
_exptl_absorpt_correction_T_max    0.157723
_exptl_absorpt_correction_T_min    0.080252
_exptl_absorpt_correction_type     multi-scan
_exptl_absorpt_process_details
;
 TWINABS-2012/1 (Bruker,2012) was used for absorption correction.

Final HKLF 4 output contains 25175 reflections, Rint = 0.0371
 (13854 with I > 3sig(I), Rint = 0.0318)
 Reflections merged according to point-group -3m1  
 Additional spherical absorption correction applied with mu*r =  1.5000
;
_exptl_absorpt_special_details     ?
_exptl_crystal_colour              yellow
_exptl_crystal_colour_primary      yellow
_exptl_crystal_density_diffrn      2.080
_exptl_crystal_density_meas        ?
_exptl_crystal_density_method      ?
_exptl_crystal_description         block
_exptl_crystal_F_000               1728
_exptl_crystal_recrystallization_method  ?
_exptl_crystal_size_max            0.15
_exptl_crystal_size_mid            0.15
_exptl_crystal_size_min            0.15
_exptl_transmission_factor_max     ?
_exptl_transmission_factor_min     ?
_diffrn_reflns_av_R_equivalents    0.0371
_diffrn_reflns_av_unetI/netI       0.0106
_diffrn_reflns_Laue_measured_fraction_full  0.992
_diffrn_reflns_Laue_measured_fraction_max  0.994
_diffrn_reflns_limit_h_max         ?
_diffrn_reflns_limit_h_min         ?
_diffrn_reflns_limit_k_max         ?
_diffrn_reflns_limit_k_min         ?
_diffrn_reflns_limit_l_max         ?
_diffrn_reflns_limit_l_min         ?
_diffrn_reflns_number              1082
_diffrn_reflns_point_group_measured_fraction_full  0.992
_diffrn_reflns_point_group_measured_fraction_max  0.994
_diffrn_reflns_theta_full          25.242
_diffrn_reflns_theta_max           31.513
_diffrn_reflns_theta_min           3.277
_diffrn_ambient_temperature        250(2)
_diffrn_detector                   PIXEL
_diffrn_detector_area_resol_mean   7.41
_diffrn_detector_type              'Bruker PHOTON III area detector'
_diffrn_measured_fraction_theta_full  0.992
_diffrn_measured_fraction_theta_max  0.994
_diffrn_measurement_device         'three-circle diffractometer'
_diffrn_measurement_device_type    'Bruker D8 Venture Photon-III'
_diffrn_measurement_method         '\w and \f scans'
_diffrn_measurement_details
;
 Data collection was performed by Dr. A.S. Sukhikh
 in XRD Facility of NIIC SB RAS.
;
_diffrn_radiation_monochromator    'Incoatec HELIOS multilayer mirrors'
_diffrn_radiation_type             MoK\a
_diffrn_radiation_wavelength       0.71073
_diffrn_source                     'Incoatec IuS3.0 microfocus X-ray tube'
_diffrn_source_current             1.4
_diffrn_source_power               0.07
_diffrn_source_voltage             50.0
_diffrn_standards_number           .
_reflns_Friedel_coverage           0.000
_reflns_Friedel_fraction_full      .
_reflns_Friedel_fraction_max       .
_reflns_number_gt                  951
_reflns_number_total               1082
_reflns_special_details
;
 Reflections were merged by SHELXL according to the crystal
 class for the calculation of statistics and refinement.
 
 _reflns_Friedel_fraction is defined as the number of unique
 Friedel pairs measured divided by the number that would be
 possible theoretically, ignoring centric projections and
 systematic absences.
;
_reflns_threshold_expression       'I > 2\s(I)'
_computing_cell_refinement         'SAINT V8.38A (Bruker, 2018)'
_computing_data_collection         'Bruker APEX3'
_computing_data_reduction          'SAINT V8.38A (Bruker, 2018)'
_computing_molecular_graphics      'Olex2 1.3 (Dolomanov et al., 2009)'
_computing_publication_material    'Olex2 1.3 (Dolomanov et al., 2009)'
_computing_structure_refinement    'SHELXL 2014/7 (Sheldrick, 2015)'
_computing_structure_solution      'SHELXT 2014/5 (Sheldrick, 2014)'
_refine_diff_density_max           0.415
_refine_diff_density_min           -0.467
_refine_diff_density_rms           0.055
_refine_ls_extinction_coef         .
_refine_ls_extinction_method       none
_refine_ls_goodness_of_fit_ref     1.112
_refine_ls_hydrogen_treatment      constr
_refine_ls_matrix_type             full
_refine_ls_number_parameters       34
_refine_ls_number_reflns           1082
_refine_ls_number_restraints       0
_refine_ls_R_factor_all            0.0282
_refine_ls_R_factor_gt             0.0206
_refine_ls_restrained_S_all        1.112
_refine_ls_shift/su_max            0.000
_refine_ls_shift/su_mean           0.000
_refine_ls_structure_factor_coef   Fsqd
_refine_ls_weighting_details      
 'w=1/[\s^2^(Fo^2^)+(0.0128P)^2^+5.0953P] where P=(Fo^2^+2Fc^2^)/3'
_refine_ls_weighting_scheme        calc
_refine_ls_wR_factor_gt            0.0376
_refine_ls_wR_factor_ref           0.0401
_refine_special_details            ?
_olex2_refinement_description
;
1. Fixed Uiso
 At 1.2 times of:
  All N(H) groups
 At 1.5 times of:
  All C(H,H,H) groups
2. Others
 Fixed Sof: Cl2(0.33333)
3.a Ternary CH refined with riding coordinates:
 N1(H1)
3.b Idealised Me refined as rotating group:
 C1(H1A,H1B,H1C)
;
_atom_sites_solution_hydrogens     geom
_atom_sites_solution_primary       dual
_atom_sites_solution_secondary     ?
loop_
  _atom_site_label
  _atom_site_type_symbol
  _atom_site_fract_x
  _atom_site_fract_y
  _atom_site_fract_z
  _atom_site_U_iso_or_equiv
  _atom_site_adp_type
  _atom_site_occupancy
  _atom_site_site_symmetry_order
  _atom_site_calc_flag
  _atom_site_refinement_flags_posn
  _atom_site_refinement_flags_adp
  _atom_site_refinement_flags_occupancy
  _atom_site_disorder_assembly
  _atom_site_disorder_group
 Pb1 Pb 0.6667 0.3333 0.3333 0.04760(7) Uani 1 6 d S T P . .
 Cl1 Cl 0.42504(8) 0.24832(8) 0.29362(2) 0.06248(15) Uani 1 1 d . . . . .
 N1 N 0.6667 0.3333 0.21536(9) 0.0499(7) Uani 1 3 d S T P . .
 H1 H 0.6667 0.3333 0.2419 0.060 Uiso 1 3 calc R U P . .
 C1 C 0.5085(4) 0.1995(4) 0.20365(8) 0.0794(8) Uani 1 1 d . . . . .
 H1A H 0.5057 0.1936 0.1777 0.119 Uiso 1 1 calc R U . . .
 H1B H 0.4230 0.2186 0.2121 0.119 Uiso 1 1 calc R U . . .
 H1C H 0.4924 0.0982 0.2135 0.119 Uiso 1 1 calc R U . . .
 Cl2 Cl 0.1065(2) 0.0496(2) 0.26272(5) 0.0604(4) Uani 0.3333 1 d . . P A -1

loop_
  _atom_site_aniso_label
  _atom_site_aniso_U_11
  _atom_site_aniso_U_22
  _atom_site_aniso_U_33
  _atom_site_aniso_U_23
  _atom_site_aniso_U_13
  _atom_site_aniso_U_12
 Pb1 0.05257(9) 0.05257(9) 0.03766(10) 0.000 0.000 0.02629(4)
 Cl1 0.0587(3) 0.0718(4) 0.0577(3) -0.0067(3) -0.0144(3) 0.0332(3)
 N1 0.0535(11) 0.0535(11) 0.0426(15) 0.000 0.000 0.0267(5)
 C1 0.0618(17) 0.0715(18) 0.086(2) -0.0193(16) -0.0025(15) 0.0192(15)
 Cl2 0.0485(9) 0.0620(11) 0.0661(10) -0.0045(8) -0.0128(8) 0.0243(9)

_geom_special_details
;
 All esds (except the esd in the dihedral angle between two l.s. planes)
 are estimated using the full covariance matrix.  The cell esds are taken
 into account individually in the estimation of esds in distances, angles
 and torsion angles; correlations between esds in cell parameters are only
 used when they are defined by crystal symmetry.  An approximate (isotropic)
 treatment of cell esds is used for estimating esds involving l.s. planes.
;
loop_
  _geom_bond_atom_site_label_1
  _geom_bond_atom_site_label_2
  _geom_bond_distance
  _geom_bond_site_symmetry_2
  _geom_bond_publ_flag
 Pb1 Cl1 2.5057(6) 2_655 ?
 Pb1 Cl1 2.5057(6) 3_665 ?
 Pb1 Cl1 2.5057(6) . ?
 Pb1 Cl1 2.5056(6) 32 ?
 Pb1 Cl1 2.5057(6) 31_655 ?
 Pb1 Cl1 2.5057(6) 33_545 ?
 N1 H1 0.9900 . ?
 N1 C1 1.470(3) 3_665 ?
 N1 C1 1.470(3) 2_655 ?
 N1 C1 1.470(3) . ?
 C1 H1A 0.9700 . ?
 C1 H1B 0.9700 . ?
 C1 H1C 0.9700 . ?
 Cl2 Cl2 1.995(3) 6 ?

loop_
  _geom_angle_atom_site_label_1
  _geom_angle_atom_site_label_2
  _geom_angle_atom_site_label_3
  _geom_angle
  _geom_angle_site_symmetry_1
  _geom_angle_site_symmetry_3
  _geom_angle_publ_flag
 Cl1 Pb1 Cl1 88.60(2) 2_655 . ?
 Cl1 Pb1 Cl1 88.60(2) 31_655 33_545 ?
 Cl1 Pb1 Cl1 88.60(2) 33_545 32 ?
 Cl1 Pb1 Cl1 180.0 3_665 33_545 ?
 Cl1 Pb1 Cl1 91.40(2) . 32 ?
 Cl1 Pb1 Cl1 91.40(2) 3_665 32 ?
 Cl1 Pb1 Cl1 91.40(2) 2_655 31_655 ?
 Cl1 Pb1 Cl1 88.60(2) 2_655 3_665 ?
 Cl1 Pb1 Cl1 180.00(2) . 31_655 ?
 Cl1 Pb1 Cl1 180.00(3) 2_655 32 ?
 Cl1 Pb1 Cl1 91.40(2) 3_665 31_655 ?
 Cl1 Pb1 Cl1 88.60(2) . 3_665 ?
 Cl1 Pb1 Cl1 88.60(2) 31_655 32 ?
 Cl1 Pb1 Cl1 91.40(2) . 33_545 ?
 Cl1 Pb1 Cl1 91.40(2) 2_655 33_545 ?
 C1 N1 H1 107.3 2_655 . ?
 C1 N1 H1 107.3 3_665 . ?
 C1 N1 H1 107.3 . . ?
 C1 N1 C1 111.57(16) 2_655 3_665 ?
 C1 N1 C1 111.57(16) 3_665 . ?
 C1 N1 C1 111.57(16) 2_655 . ?
 N1 C1 H1A 109.5 . . ?
 N1 C1 H1B 109.5 . . ?
 N1 C1 H1C 109.5 . . ?
 H1A C1 H1B 109.5 . . ?
 H1A C1 H1C 109.5 . . ?
 H1B C1 H1C 109.5 . . ?

_shelx_res_file
;
    20210608_s4_d1-2_autotwinabs_250k.res created by SHELXL-2014/7

TITL 20210608_s4_d1-2_autotwinabs_250k_a.res in R-3c
REM Old TITL 20210608_s4_d1-2_autoTwinAbd_K in R-3c
REM SHELXT solution in R-3c
REM R1 0.077, Rweak 0.001, Alpha 0.015, Orientation as input
REM Formula found by SHELXT: C14 Cl6 Pb
CELL 0.71073 9.5183 9.5183 37.3034 90 90 120
ZERR 6 0.0002 0.0002 0.0008 0 0 0
LATT 3
SYMM -Y,+X-Y,+Z
SYMM +Y-X,-X,+Z
SYMM +Y,+X,0.5-Z
SYMM -Y+X,-Y,0.5-Z
SYMM -X,-X+Y,0.5-Z
SFAC C H Cl N Pb
UNIT 36 120 48 12 6
EQIV $1 -X,-X+Y,0.5-Z

L.S. 4 0 0
PLAN  2
SIZE 0.15 0.15 0.15
TEMP -23(2)
CONF
BIND Cl2 Cl2_$1
list 4
MORE -1
BOND $H
fmap 2 53
ACTA
REM <olex2.extras>
REM <HklSrc "%.\\20210608_s4_d1-2_autoTwinAbs_250K.hkl">
REM </olex2.extras>

WGHT    0.012800    5.095300
FVAR       0.18749
PB1   5    0.666667    0.333333    0.333333    10.16667    0.05257    0.05257 =
         0.03766    0.00000    0.00000    0.02629
CL1   3    0.425037    0.248323    0.293617    11.00000    0.05870    0.07178 =
         0.05774   -0.00674   -0.01443    0.03320
N1    4    0.666667    0.333333    0.215364    10.33333    0.05348    0.05348 =
         0.04261    0.00000    0.00000    0.02674
AFIX  13
H1    2    0.666664    0.333332    0.241903    10.33333   -1.20000
AFIX   0
C1    1    0.508483    0.199549    0.203653    11.00000    0.06178    0.07146 =
         0.08629   -0.01935   -0.00247    0.01925
AFIX 137
H1A   2    0.505721    0.193623    0.177683    11.00000   -1.50000
H1B   2    0.423005    0.218592    0.212072    11.00000   -1.50000
H1C   2    0.492372    0.098178    0.213479    11.00000   -1.50000
AFIX   0

PART -1
CL2   3    0.106451    0.049593    0.262718    10.33333    0.04854    0.06204 =
         0.06615   -0.00445   -0.01283    0.02429
HKLF 4

REM  20210608_s4_d1-2_autotwinabs_250k_a.res in R-3c
REM R1 =  0.0206 for     951 Fo > 4sig(Fo)  and  0.0282 for all    1082 data
REM     34 parameters refined using      0 restraints

END

WGHT      0.0128      5.0954

REM Highest difference peak  0.415,  deepest hole -0.467,  1-sigma level  0.055
Q1    1   0.6667  0.3333  0.3555  10.33333  0.05    0.42
Q2    1   0.4691  0.2348  0.3121  11.00000  0.05    0.38
;
_shelx_res_checksum                25765
_shelx_hkl_file
;
   0   3   0 1939.81   10.90
  -2   4   0 4725.93   32.20
  -1   5   0 3272.67   12.90
  -3   6   0 3929.91   25.00
   0   6   0  792.12    6.60
  -2   7   0  836.32    4.80
  -4   8   0  331.57    4.80
  -1   8   0  728.43    5.00
  -3   9   0  567.24    4.90
   0   9   0  194.98    4.40
  -5  10   0  349.87    5.50
  -2  10   0  293.57    3.90
  -4  11   0  254.97    3.80
  -1  11   0   43.00    2.30
  -6  12   0  110.09    4.20
  -3  12   0   53.29    2.50
   0  12   0   42.20    5.40
  -5  13   0   53.79    2.60
  -2  13   0   10.60    3.80
  -1   1   1    0.20    0.10
   0   2   1    0.70    0.20
  -2   3   1   66.59    0.80
  -4   4   1    0.50    0.40
  -1   4   1  190.28    1.40
  -3   5   1  509.55    2.70
   0   5   1    1.40    0.80
  -5   6   1  198.98    1.70
  -2   6   1  187.08    1.60
  -7   7   1    3.50    1.00
  -4   7   1    1.40    0.50
  -1   7   1   58.09    1.50
  -6   8   1  102.39    1.60
  -3   8   1    3.50    0.80
   0   8   1    1.40    1.40
  -8   9   1   46.60    1.90
  -5   9   1   17.20    1.20
  -2   9   1   71.69    2.20
 -10  10   1    4.10    1.80
  -7  10   1    8.60    1.40
  -4  10   1   20.80    1.60
  -1  10   1    3.90    1.20
  -9  11   1    1.90    1.40
  -6  11   1   20.10    2.60
  -3  11   1    8.60    1.60
   0  11   1    4.00    2.10
 -11  12   1    2.80    1.70
  -8  12   1    7.40    1.70
  -5  12   1    3.10    1.70
  -2  12   1    3.00    1.50
 -10  13   1    1.10    1.90
  -7  13   1    2.00    1.40
  -4  13   1    1.80    2.60
  -2   2   2 4130.59   26.80
  -1   3   2  411.56    2.00
  -3   4   2 5686.93   22.60
   0   4   2 2432.76   14.10
  -5   5   2 1469.95   10.30
  -2   5   2 6465.95   24.90
  -4   6   2 2752.62   12.20
  -1   6   2 2351.76   11.10
  -6   7   2  862.71    5.10
  -3   7   2 1384.46    9.90
   0   7   2  745.43    6.70
  -8   8   2  662.13    7.10
  -5   8   2  543.05    4.80
  -2   8   2  613.74    4.90
  -7   9   2  608.44    5.80
  -4   9   2  294.77    3.20
  -1   9   2  444.16    4.50
  -9  10   2   98.39    2.80
  -6  10   2  210.68    2.80
  -3  10   2  397.06    4.20
   0  10   2   87.69    4.60
 -11  11   2   68.79    6.40
  -8  11   2   95.09    2.70
  -5  11   2  113.59    2.50
  -2  11   2   61.09    2.50
 -10  12   2   48.30    2.70
  -7  12   2   24.80    1.80
  -4  12   2   45.80    2.10
  -1  12   2   27.80    3.50
  -9  13   2   22.90    2.30
  -6  13   2   15.40    1.90
  -3  13   2    8.20    2.50
   0   0   3    0.30    0.10
  -1   2   3  107.99    0.80
  -3   3   3    0.80    0.40
   0   3   3    0.40    0.30
  -2   4   3    9.50    0.50
  -4   5   3  751.32    4.00
  -1   5   3   70.89    0.90
  -6   6   3    1.70    1.10
  -3   6   3   32.80    0.80
   0   6   3    1.80    0.70
  -5   7   3  108.79    1.50
  -2   7   3    3.30    0.60
  -7   8   3    8.00    1.20
  -4   8   3  160.18    2.00
  -1   8   3  107.89    1.80
  -9   9   3    1.40    1.70
  -6   9   3    3.80    1.10
  -3   9   3    1.60    0.80
   0   9   3    4.00    2.20
  -8  10   3    7.00    1.50
  -5  10   3    1.00    1.10
  -2  10   3    2.30    1.20
 -10  11   3    3.70    1.40
  -7  11   3   42.50    2.00
  -4  11   3    5.40    2.00
  -1  11   3    6.50    1.40
 -12  12   3    4.70    2.70
  -9  12   3    3.20    1.70
  -6  12   3    2.20    1.60
  -3  12   3    2.00    1.70
   0  12   3    2.10    3.20
  -8  13   3    4.40    1.80
  -5  13   3    0.90    1.70
   0   2   4  553.14    3.50
  -2   3   4 7525.45   48.40
  -4   4   4 2945.91   16.40
  -1   4   4 1819.62    7.30
  -3   5   4 3341.77   15.40
   0   5   4 2027.30   11.90
  -5   6   4  252.97    2.00
  -2   6   4 1899.41    8.40
  -7   7   4  662.83    6.10
  -4   7   4  678.93    4.70
  -1   7   4  184.28    2.00
  -6   8   4  729.43    5.10
  -3   8   4  233.88    2.50
   0   8   4  179.58    3.20
  -8   9   4  270.37    3.40
  -5   9   4  383.76    3.90
  -2   9   4  276.77    3.10
 -10  10   4   25.30    2.40
  -7  10   4  293.07    3.50
  -4  10   4  382.06    4.00
  -1  10   4  184.38    2.80
  -9  11   4   73.79    2.60
  -6  11   4  154.68    2.90
  -3  11   4  154.88    2.90
   0  11   4   48.70    3.60
 -11  12   4   27.10    2.40
  -8  12   4   67.89    2.50
  -5  12   4  111.09    2.80
  -2  12   4   14.90    1.90
 -10  13   4   25.30    2.30
  -7  13   4   27.60    2.50
  -4  13   4   18.20    2.60
   0   1   5    0.40    0.10
  -2   2   5    0.40    0.30
  -1   3   5 1377.46    6.30
  -3   4   5  110.09    1.00
   0   4   5    1.10    0.70
  -5   5   5    0.60    0.50
  -2   5   5  141.79    1.30
  -4   6   5  164.18    1.50
  -1   6   5   75.49    1.30
  -6   7   5  112.59    1.70
  -3   7   5   72.59    1.30
   0   7   5    1.90    0.90
  -8   8   5    4.50    1.80
  -5   8   5   39.90    1.30
  -2   8   5   73.99    1.70
  -7   9   5    3.50    1.30
  -4   9   5   76.89    1.70
  -1   9   5    4.30    1.00
  -9  10   5   13.40    1.50
  -6  10   5   11.50    1.30
  -3  10   5    2.20    1.20
   0  10   5    4.00    1.80
 -11  11   5    1.50    2.10
  -8  11   5    1.80    1.10
  -5  11   5   12.20    2.00
  -2  11   5   11.20    1.40
 -10  12   5    6.10    1.60
  -7  12   5    4.10    1.60
  -4  12   5    2.70    1.80
  -1  12   5    3.20    1.90
  -9  13   5    3.80    2.20
  -6  13   5    4.60    1.80
  -3  13   5    2.70    2.40
   0   0   6 4349.86   64.59
  -1   2   6 3106.09   13.20
  -3   3   6 8826.82   63.09
   0   3   6  250.17    2.10
  -2   4   6 3136.99   12.30
  -4   5   6 1059.79    5.30
  -1   5   6 4611.34   17.70
  -6   6   6  740.83    6.20
  -3   6   6 2062.49    9.50
   0   6   6 2458.15   19.50
  -5   7   6 1046.50    5.90
  -2   7   6 1391.76   10.30
  -7   8   6  914.31    6.00
  -4   8   6  713.83    6.20
  -1   8   6  370.16    3.90
  -9   9   6   71.49    3.10
  -6   9   6  483.95    5.10
  -3   9   6  301.77    3.10
   0   9   6  385.46    6.40
  -8  10   6  109.79    2.90
  -5  10   6  178.28    2.50
  -2  10   6  206.58    2.70
 -10  11   6   53.19    3.20
  -7  11   6   51.09    1.90
  -4  11   6  118.29    2.20
  -1  11   6   83.79    2.80
 -12  12   6   35.50    4.20
  -9  12   6   76.09    3.10
  -6  12   6   40.60    2.40
  -3  12   6   13.30    1.70
   0  12   6   23.30    3.60
  -8  13   6   18.20    2.70
  -5  13   6   23.50    2.30
  -1   1   7    0.30    0.20
   0   2   7    0.80    0.20
  -2   3   7  956.10    4.10
  -4   4   7    1.50    0.50
  -1   4   7   78.89    0.80
  -3   5   7   14.90    0.70
   0   5   7    2.20    0.60
  -5   6   7  108.79    1.40
  -2   6   7  209.08    1.70
  -7   7   7    3.30    1.70
  -4   7   7   53.09    1.10
  -1   7   7  176.38    1.90
  -6   8   7   46.70    1.50
  -3   8   7   22.20    1.00
   0   8   7    1.00    1.00
  -8   9   7    2.00    1.10
  -5   9   7   65.69    1.70
  -2   9   7    5.60    0.90
 -10  10   7    1.50    1.80
  -7  10   7    3.10    1.00
  -4  10   7    7.20    1.10
  -1  10   7   18.30    1.40
  -9  11   7   12.40    1.80
  -6  11   7   11.50    1.20
  -3  11   7    2.50    1.30
   0  11   7    4.20    2.30
 -11  12   7    3.40    1.60
  -8  12   7    1.20    1.30
  -5  12   7    2.90    1.40
  -2  12   7    4.10    2.10
 -10  13   7    1.10    2.20
  -7  13   7    4.20    2.20
  -4  13   7    0.90    1.80
  -1   3   8 3256.77   13.10
  -3   4   8 5889.51   26.00
   0   4   8 1922.61   11.20
  -5   5   8 1131.99    7.40
  -2   5   8 1547.75    6.70
  -4   6   8  972.90    5.50
  -1   6   8 2221.58   10.00
  -6   7   8 1661.33    9.00
  -3   7   8 1065.79    6.20
   0   7   8  384.66    4.40
  -8   8   8  561.84    6.40
  -5   8   8 1191.98    8.00
  -2   8   8  344.87    3.10
  -7   9   8  419.66    4.10
  -4   9   8  529.05    4.50
  -1   9   8  222.18    2.60
  -9  10   8   80.89    2.30
  -6  10   8  222.48    3.20
  -3  10   8  220.88    2.60
   0  10   8  200.58    5.30
 -11  11   8   33.50    2.90
  -8  11   8  105.09    2.70
  -5  11   8  226.88    3.10
  -2  11   8   99.59    2.70
 -10  12   8   74.99    2.90
  -7  12   8   79.29    2.60
  -4  12   8   97.69    3.40
  -1  12   8   28.00    3.50
  -9  13   8   55.29    2.90
  -6  13   8   74.39    3.70
  -3  13   8   18.10    2.80
   0   0   9    0.60    0.30
  -1   2   9  120.79    1.00
  -3   3   9    0.70    0.40
   0   3   9    1.10    0.50
  -2   4   9   11.50    0.50
  -4   5   9    9.50    0.50
  -1   5   9  523.15    3.20
  -6   6   9    1.80    0.90
  -3   6   9   16.10    0.60
   0   6   9    2.20    0.80
  -5   7   9    2.70    0.60
  -2   7   9   76.49    1.30
  -7   8   9   77.49    2.00
  -4   8   9  245.48    2.80
  -1   8   9    2.80    0.60
  -9   9   9    3.80    1.60
  -6   9   9    4.50    1.10
  -3   9   9   10.40    0.90
   0   9   9    1.10    1.40
  -8  10   9    2.30    1.20
  -5  10   9    1.80    0.80
  -2  10   9    7.70    1.20
 -10  11   9    3.60    1.50
  -7  11   9    1.30    0.90
  -4  11   9   37.80    1.40
  -1  11   9    3.10    1.30
  -9  12   9    3.40    1.40
  -6  12   9    3.60    1.90
  -3  12   9    3.40    1.90
  -8  13   9    2.40    2.20
  -5  13   9    4.50    2.30
  -1   1  10  919.61    5.50
   0   2  10 2677.63   14.60
  -2   3  10 9999.00   52.39
  -4   4  10 3693.53   22.40
  -1   4  10 2841.82   11.70
  -3   5  10 1181.08    5.70
   0   5  10 4432.76   24.40
  -5   6  10 1058.79    5.40
  -2   6  10 1893.61    9.60
  -7   7  10  858.41    7.80
  -4   7  10 1237.48    6.90
  -1   7  10 1500.55   12.20
  -6   8  10  726.93    5.50
  -3   8  10  996.90    7.20
   0   8  10  371.46    5.60
  -8   9  10  148.99    2.60
  -5   9  10  516.95    5.00
  -2   9  10  249.78    3.10
 -10  10  10  138.09    4.80
  -7  10  10   60.49    2.00
  -4  10  10  218.38    3.60
  -1  10  10  194.38    2.90
  -9  11  10  139.79    4.10
  -6  11  10   57.89    1.10
  -3  11  10   82.89    2.80
   0  11  10   39.60    3.80
 -11  12  10   35.90    3.30
  -8  12  10   52.89    2.70
  -5  12  10   70.19    2.90
  -2  12  10   29.60    3.10
 -10  13  10   38.50    2.60
  -7  13  10   29.80    2.90
  -4  13  10   18.10    2.40
   0   1  11    0.40    0.20
  -2   2  11    0.70    0.30
  -1   3  11    1.40    0.30
  -3   4  11  169.28    1.30
   0   4  11    0.80    0.50
  -5   5  11    1.40    0.60
  -2   5  11  278.67    2.20
  -4   6  11   87.89    1.20
  -1   6  11  196.08    2.00
  -6   7  11   72.99    1.60
  -3   7  11    1.70    0.80
   0   7  11    1.60    0.80
  -8   8  11    1.40    1.50
  -5   8  11    2.30    0.80
  -2   8  11   49.50    1.20
  -7   9  11   70.19    1.80
  -4   9  11   11.60    1.50
  -1   9  11   38.40    1.30
  -9  10  11    1.40    1.40
  -6  10  11    5.80    0.90
  -3  10  11    4.70    1.40
   0  10  11    2.20    2.10
 -11  11  11    3.10    2.20
  -8  11  11    6.10    1.30
  -5  11  11   17.70    1.80
  -2  11  11    3.60    2.10
 -10  12  11    3.10    2.10
  -7  12  11    4.10    1.60
  -4  12  11    4.50    1.90
  -1  12  11    2.50    2.50
  -9  13  11    2.30    2.00
  -6  13  11    2.20    2.10
  -3  13  11    4.30    2.20
   0   0  12  867.11    9.00
  -1   2  12 5232.28   25.40
  -3   3  12 7514.75   75.59
   0   3  12 5367.26   28.60
  -2   4  12 2315.57    9.60
  -4   5  12 1091.69    5.70
  -1   5  12  961.00    4.90
  -6   6  12 1463.85   11.00
  -3   6  12  296.57    2.30
   0   6  12  665.53    6.20
  -5   7  12 1204.98    7.80
  -2   7  12  583.54    4.80
  -7   8  12  370.46    3.40
  -4   8  12 1036.30    7.30
  -1   8  12  125.79    1.90
  -9   9  12  148.99    3.80
  -6   9  12  344.67    3.90
  -3   9  12  229.08    3.50
   0   9  12  175.68    4.00
  -8  10  12  101.59    2.40
  -5  10  12  261.57    4.30
  -2  10  12  102.09    2.60
 -10  11  12   65.89    2.40
  -7  11  12   90.49    3.40
  -4  11  12   91.79    2.80
  -1  11  12   97.09    4.10
  -9  12  12   61.49    2.80
  -6  12  12  104.49    3.40
  -3  12  12   56.79    2.60
  -8  13  12   29.90    2.60
  -5  13  12   29.40    2.80
  -1   1  13    0.30    0.40
   0   2  13    0.40    0.50
  -2   3  13   72.59    0.80
  -4   4  13    1.10    0.50
  -1   4  13  114.39    1.50
  -3   5  13  353.56    2.30
   0   5  13    1.10    0.60
  -5   6  13  129.09    1.60
  -2   6  13  146.39    1.90
  -7   7  13    2.30    1.30
  -4   7  13   20.10    1.00
  -1   7  13   19.70    0.80
  -6   8  13   69.39    1.60
  -3   8  13    4.10    1.30
   0   8  13    1.20    1.10
  -8   9  13   25.30    1.40
  -5   9  13    8.30    1.10
  -2   9  13   46.80    1.80
 -10  10  13    3.20    1.90
  -7  10  13    6.60    1.00
  -4  10  13   29.10    2.60
  -1  10  13    2.40    1.10
  -9  11  13    2.70    1.30
  -6  11  13   13.20    1.80
  -3  11  13   10.70    2.20
   0  11  13    3.80    3.10
 -11  12  13    3.90    1.80
  -8  12  13    5.40    1.90
  -5  12  13    5.30    3.00
  -2  12  13    3.70    2.20
  -7  13  13    1.80    2.30
  -4  13  13    2.50    1.90
   0   1  14  932.91    5.50
  -2   2  14 3379.76   18.00
  -1   3  14 6166.08   24.20
  -3   4  14 1139.59    5.60
   0   4  14 3289.47   19.80
  -5   5  14 1564.74   10.00
  -2   5  14  595.64    3.90
  -4   6  14  751.42    4.40
  -1   6  14 1599.34   10.10
  -6   7  14  726.53    4.90
  -3   7  14 1073.29    7.30
   0   7  14 1031.70   13.70
  -8   8  14  108.39    3.00
  -5   8  14  686.33    5.80
  -2   8  14  730.63    6.80
  -7   9  14   75.29    1.80
  -4   9  14  429.66    5.40
  -1   9  14  181.08    2.30
  -9  10  14  150.48    3.50
  -6  10  14  110.79    2.70
  -3  10  14   66.79    2.40
   0  10  14  100.39    3.60
 -11  11  14   39.50    3.10
  -8  11  14   76.69    3.70
  -5  11  14   55.09    2.50
  -2  11  14   67.99    2.90
 -10  12  14   41.80    3.00
  -7  12  14   58.19    3.00
  -4  12  14   32.60    2.20
  -1  12  14   11.50    2.50
  -9  13  14   21.00    2.30
  -6  13  14   20.80    2.60
   0   0  15    1.50    0.50
  -1   2  15   43.90    0.60
  -3   3  15    1.10    0.50
   0   3  15    1.70    0.50
  -2   4  15   41.20    0.80
  -4   5  15  358.36    2.40
  -1   5  15  136.09    1.60
  -6   6  15    1.50    1.00
  -3   6  15    3.50    0.70
   0   6  15    0.80    0.90
  -5   7  15   47.40    1.10
  -2   7  15    2.70    0.80
  -7   8  15   11.30    1.10
  -4   8  15   82.89    2.30
  -1   8  15   83.29    1.60
  -9   9  15    0.60    1.70
  -6   9  15    4.20    1.10
  -3   9  15    3.70    1.30
   0   9  15    0.90    1.10
  -8  10  15    2.60    1.00
  -5  10  15    3.30    1.40
  -2  10  15    3.10    1.10
 -10  11  15    3.20    1.60
  -7  11  15   27.70    2.30
  -4  11  15    5.30    1.60
  -1  11  15    5.50    3.20
  -9  12  15    4.40    1.80
  -6  12  15    3.30    1.80
  -3  12  15    2.10    2.00
  -8  13  15    4.70    2.10
  -5  13  15    2.70    2.40
  -1   1  16 3547.75   20.60
   0   2  16 9327.37   69.19
  -2   3  16 3107.99   13.80
  -4   4  16 2431.36   19.50
  -1   4  16 2652.13   11.30
  -3   5  16 1010.50    5.10
   0   5  16  518.05    5.20
  -5   6  16 2719.13   14.60
  -2   6  16  478.75    3.70
  -7   7  16  640.14    6.70
  -4   7  16 1166.38    7.70
  -1   7  16  707.93    5.30
  -6   8  16  462.25    4.20
  -3   8  16  750.72    6.20
   0   8  16  268.17    5.10
  -8   9  16  218.08    3.20
  -5   9  16  403.56    4.70
  -2   9  16  212.68    3.50
 -10  10  16  147.09    4.50
  -7  10  16  147.89    3.00
  -4  10  16  142.99    3.30
  -1  10  16   85.19    2.90
  -9  11  16   85.19    2.90
  -6  11  16  151.28    4.00
  -3  11  16   89.39    2.80
   0  11  16   32.80    3.90
 -11  12  16    7.40    2.30
  -8  12  16   62.59    3.50
  -5  12  16   59.49    2.70
  -2  12  16   62.39    3.70
  -7  13  16   52.29    2.80
  -4  13  16   42.10    3.30
   0   1  17    0.60    0.60
  -2   2  17    0.50    0.40
  -1   3  17  423.56    2.50
  -3   4  17    9.00    0.50
   0   4  17    0.80    0.40
  -5   5  17    1.30    0.70
  -2   5  17   69.19    1.40
  -4   6  17  129.99    1.70
  -1   6  17   36.70    1.10
  -6   7  17   41.10    1.40
  -3   7  17   23.30    1.10
   0   7  17    0.70    1.00
  -8   8  17    1.10    1.20
  -5   8  17   19.70    1.10
  -2   8  17   72.49    1.60
  -7   9  17    1.30    0.70
  -4   9  17   52.39    2.60
  -1   9  17    5.50    1.20
  -9  10  17    7.70    1.40
  -6  10  17   12.70    1.80
  -3  10  17    4.10    1.50
   0  10  17    3.40    3.00
 -11  11  17    6.50    3.00
  -8  11  17    2.80    1.50
  -5  11  17    4.10    2.00
  -2  11  17   12.00    2.50
 -10  12  17    2.70    1.80
  -7  12  17    4.20    1.80
  -4  12  17    2.60    2.00
  -6  13  17    2.30    3.20
   0   0  18 2008.60   19.60
  -1   2  18 3575.74   13.80
  -3   3  18  698.33    5.80
   0   3  18 7546.15   40.90
  -2   4  18 2285.87   11.00
  -4   5  18 1974.60    9.10
  -1   5  18 1372.76    8.50
  -6   6  18  868.11    7.80
  -3   6  18 1159.48    6.90
   0   6  18  991.80   14.10
  -5   7  18  623.74    4.50
  -2   7  18 1014.80    7.00
  -7   8  18   81.39    1.70
  -4   8  18  578.94    5.50
  -1   8  18  691.03    7.90
  -9   9  18  253.97    5.80
  -6   9  18  136.09    2.50
  -3   9  18  369.56    4.80
   0   9  18  114.09    4.50
  -8  10  18  159.88    3.70
  -5  10  18  160.88    3.70
  -2  10  18  123.09    4.20
 -10  11  18   71.69    2.80
  -7  11  18  131.99    4.10
  -4  11  18   65.29    2.60
  -1  11  18   33.10    2.60
  -9  12  18   27.20    2.70
  -6  12  18   58.29    3.10
  -3  12  18   50.39    3.60
  -8  13  18   26.80    2.50
  -5  13  18   11.70    2.60
  -1   1  19    0.30    0.40
   0   2  19    1.90    0.50
  -2   3  19  265.17    1.70
  -4   4  19    1.90    0.60
  -1   4  19   42.80    0.70
  -3   5  19    2.00    0.50
   0   5  19    0.90    0.60
  -5   6  19   62.89    1.30
  -2   6  19   79.79    1.70
  -7   7  19    0.80    1.00
  -4   7  19   34.00    1.60
  -1   7  19  115.59    2.20
  -6   8  19    6.90    1.30
  -3   8  19   18.20    1.40
   0   8  19    2.20    2.00
  -8   9  19    1.00    0.80
  -5   9  19   44.40    2.10
  -2   9  19    5.30    1.10
 -10  10  19    1.30    2.70
  -7  10  19    1.90    1.10
  -4  10  19    2.90    1.40
  -1  10  19    6.80    1.70
  -9  11  19    7.40    1.70
  -6  11  19    9.80    1.90
  -3  11  19    1.50    1.50
   0  11  19   11.50   15.00
  -8  12  19    4.00    1.80
  -5  12  19    3.70    1.70
  -2  12  19    4.10    2.70
  -7  13  19    5.00    2.10
   0   1  20 3125.69   18.10
  -2   2  20  444.86    3.60
  -1   3  20 3163.48   14.60
  -3   4  20  998.60    5.40
   0   4  20 1295.17    8.90
  -5   5  20 2303.97   21.00
  -2   5  20 1296.67    6.90
  -4   6  20 1641.34    8.80
  -1   6  20  176.78    2.10
  -6   7  20  423.46    3.70
  -3   7  20  576.14    4.90
   0   7  20  286.67    5.90
  -8   8  20  208.58    3.90
  -5   8  20  322.27    4.20
  -2   8  20  345.77    3.70
  -7   9  20  227.98    3.80
  -4   9  20  210.28    3.70
  -1   9  20  127.59    2.80
  -9  10  20  124.19    2.70
  -6  10  20  214.98    4.00
  -3  10  20  114.19    3.30
   0  10  20   30.40    3.70
 -11  11  20    8.80    2.90
  -8  11  20   79.99    3.20
  -5  11  20   67.49    2.90
  -2  11  20   60.39    3.20
 -10  12  20    5.80    2.10
  -7  12  20   50.59    3.10
  -4  12  20   35.00    2.80
  -6  13  20    9.50    2.20
   0   0  21    0.00    1.50
  -1   2  21   56.79    0.90
  -3   3  21    0.90    0.50
   0   3  21    0.60    0.50
  -2   4  21   17.90    0.70
  -4   5  21    1.70    0.50
  -1   5  21  180.28    2.10
  -6   6  21    2.20    1.10
  -3   6  21    8.60    1.10
   0   6  21    1.80    0.70
  -5   7  21    5.20    1.00
  -2   7  21   47.40    1.50
  -7   8  21   37.50    1.40
  -4   8  21  143.39    3.00
  -1   8  21    1.70    0.90
  -9   9  21    4.20    1.80
  -6   9  21    3.20    1.40
  -3   9  21    9.20    1.40
   0   9  21    1.50    2.30
  -8  10  21    2.40    1.40
  -5  10  21    4.10    1.80
  -2  10  21    8.30    2.30
 -10  11  21    2.00    1.80
  -7  11  21    4.40    1.70
  -4  11  21   13.60    1.80
  -1  11  21    8.60    3.80
  -9  12  21    2.90    1.90
  -6  12  21    2.40    2.30
  -3  12  21    2.50    2.80
  -1   1  22 3855.11   22.60
   0   2  22 3243.58   18.10
  -2   3  22  413.06    2.90
  -4   4  22  673.53    5.60
  -1   4  22 1927.11   10.30
  -3   5  22 1589.24    8.30
   0   5  22  549.65    9.10
  -5   6  22  572.54    4.20
  -2   6  22  931.11    6.30
  -7   7  22   76.09    2.20
  -4   7  22  426.36    4.00
  -1   7  22  534.05    6.30
  -6   8  22  102.79    2.10
  -3   8  22  300.87    3.40
   0   8  22  296.77    7.30
  -8   9  22  158.98    3.40
  -5   9  22  109.29    2.90
  -2   9  22  268.67    6.10
 -10  10  22   39.00    3.50
  -7  10  22  175.28    3.90
  -4  10  22   93.69    3.20
  -1  10  22   39.40    2.60
  -9  11  22   31.80    2.20
  -6  11  22   79.79    3.60
  -3  11  22   52.19    3.50
   0  11  22    9.90    3.30
  -8  12  22   31.80    2.90
  -5  12  22   24.10    2.60
   0   1  23    0.50    0.50
  -2   2  23    0.80    0.50
  -1   3  23   11.40    0.50
  -3   4  23   69.99    1.20
   0   4  23    1.10    0.60
  -5   5  23    1.30    0.80
  -2   5  23   83.99    1.50
  -4   6  23   34.00    1.20
  -1   6  23  103.89    1.70
  -6   7  23   34.60    1.00
  -3   7  23    5.20    1.10
   0   7  23    1.30    2.00
  -8   8  23    1.60    1.30
  -5   8  23    3.90    1.20
  -2   8  23   11.10    1.10
  -7   9  23   26.40    1.80
  -4   9  23    7.40    1.50
  -1   9  23   15.60    1.70
  -9  10  23    3.20    1.80
  -6  10  23    3.10    1.50
  -3  10  23    4.10    1.60
   0  10  23    1.00    4.40
 -11  11  23    1.10    6.00
  -8  11  23    6.00    1.80
  -5  11  23   12.50    1.90
  -2  11  23    1.40    1.90
  -7  12  23    5.30    1.90
  -4  12  23    5.50    1.90
   0   0  24 7804.42   83.49
  -1   2  24 1697.53    7.90
  -3   3  24  579.14    4.80
   0   3  24  837.42    7.40
  -2   4  24 1440.76    8.40
  -4   5  24 1892.71   10.50
  -1   5  24  772.72    5.10
  -6   6  24  628.64    8.00
  -3   6  24 1486.85    8.80
   0   6  24  285.07    5.60
  -5   7  24  483.25    4.30
  -2   7  24  385.16    3.70
  -7   8  24  358.36    4.30
  -4   8  24  178.28    3.00
  -1   8  24  277.67    4.00
  -9   9  24  133.09    3.80
  -6   9  24  245.98    4.10
  -3   9  24  196.08    3.10
   0   9  24   63.39    4.60
  -8  10  24  130.09    3.20
  -5  10  24  118.89    3.20
  -2  10  24  101.79    3.70
 -10  11  24    6.80    2.20
  -7  11  24   86.89    3.00
  -4  11  24   73.59    3.10
  -1  11  24   25.30    2.80
  -9  12  24   11.80    3.00
  -6  12  24   27.80    2.80
  -3  12  24   36.70    4.10
  -1   1  25    0.50    0.90
   0   2  25    0.50    0.60
  -2   3  25   25.30    0.70
  -4   4  25    0.40    0.80
  -1   4  25   48.30    1.00
  -3   5  25   95.99    1.70
   0   5  25    1.30    0.70
  -5   6  25   34.90    1.30
  -2   6  25   81.89    1.80
  -7   7  25    0.80    1.00
  -4   7  25   16.40    1.60
  -1   7  25    2.70    0.90
  -6   8  25   29.10    1.50
  -3   8  25    1.80    1.10
   0   8  25    2.70    2.20
  -8   9  25    9.40    1.50
  -5   9  25    3.70    1.70
  -2   9  25   25.80    1.70
 -10  10  25    2.50    2.50
  -7  10  25    2.80    1.70
  -4  10  25   13.30    1.80
  -1  10  25    4.90    2.20
  -9  11  25    2.60    1.70
  -6  11  25    4.80    2.10
  -3  11  25    2.80    1.90
  -8  12  25    3.20    1.80
  -5  12  25    2.70    1.90
   0   1  26 3982.00   25.70
  -2   2  26 1451.95   12.80
  -1   3  26  941.81    6.20
  -3   4  26 1480.65    7.40
   0   4  26 1075.69   11.40
  -5   5  26  393.16    4.40
  -2   5  26 1950.90   10.40
  -4   6  26  690.03    5.10
  -1   6  26  705.53    5.70
  -6   7  26  118.69    2.10
  -3   7  26  422.36    4.00
   0   7  26  307.47    6.90
  -8   8  26  213.78    4.90
  -5   8  26  134.99    2.80
  -2   8  26  265.57    4.10
  -7   9  26  225.48    3.90
  -4   9  26  140.29    3.10
  -1   9  26  153.48    4.30
  -9  10  26   48.80    2.30
  -6  10  26  155.28    4.00
  -3  10  26  174.18    5.60
   0  10  26   33.80    4.30
  -8  11  26   59.19    2.70
  -5  11  26   87.39    3.90
  -2  11  26   31.50    2.80
  -7  12  26   29.70    2.60
  -4  12  26   38.40    4.10
   0   0  27    0.60    1.60
  -1   2  27    5.90    0.60
  -3   3  27    1.80    0.80
   0   3  27    0.50    0.70
  -2   4  27   14.10    0.70
  -4   5  27  114.89    1.60
  -1   5  27   78.29    1.60
  -6   6  27    0.80    1.00
  -3   6  27    2.60    1.00
   0   6  27    1.30    1.90
  -5   7  27   18.70    1.20
  -2   7  27    1.40    1.10
  -7   8  27    5.70    1.20
  -4   8  27   15.00    1.60
  -1   8  27   35.10    2.70
  -9   9  27    3.10    2.20
  -6   9  27    2.70    1.70
  -3   9  27    2.00    1.30
   0   9  27    1.80    4.10
  -8  10  27    0.70    1.70
  -5  10  27    3.10    1.60
  -2  10  27    3.50    1.90
 -10  11  27    5.60    3.30
  -7  11  27   12.40    2.10
  -4  11  27    4.10    1.80
  -1  11  27    3.00    2.10
  -6  12  27    1.90    1.90
  -1   1  28 1726.83   11.90
   0   2  28  253.87    3.00
  -2   3  28 1010.80    5.90
  -4   4  28 1043.10    8.00
  -1   4  28  604.34    4.40
  -3   5  28 1314.37    8.10
   0   5  28  561.54    6.90
  -5   6  28  284.07    3.10
  -2   6  28  735.73    5.50
  -7   7  28  361.76    5.90
  -4   7  28  322.97    3.70
  -1   7  28  162.38    3.10
  -6   8  28  328.77    3.70
  -3   8  28  129.89    2.50
   0   8  28  117.89    4.80
  -8   9  28  132.89    2.80
  -5   9  28  158.48    3.50
  -2   9  28  126.79    2.90
 -10  10  28    6.90    3.20
  -7  10  28  111.49    3.30
  -4  10  28  100.79    3.20
  -1  10  28   58.79    3.50
  -9  11  28   12.80    2.60
  -6  11  28   34.40    2.40
  -3  11  28   60.59    8.00
   0   1  29    0.50    0.80
  -2   2  29    0.40    1.10
  -1   3  29   95.89    1.40
  -3   4  29    0.90    0.70
   0   4  29    0.70    0.80
  -5   5  29    1.00    1.10
  -2   5  29   29.70    1.10
  -4   6  29   48.80    1.70
  -1   6  29    9.00    0.90
  -6   7  29    5.90    1.00
  -3   7  29    3.50    1.10
   0   7  29    0.70    1.90
  -8   8  29    1.90    1.30
  -5   8  29    9.80    1.60
  -2   8  29   38.80    1.90
  -7   9  29    2.30    1.50
  -4   9  29   15.90    1.70
  -1   9  29    8.40    2.30
  -9  10  29    2.40    1.90
  -6  10  29    5.10    2.00
  -3  10  29    2.60    1.60
   0  10  29    0.70    4.50
  -8  11  29    2.00    1.80
  -5  11  29    4.60    1.80
  -2  11  29    2.40    2.10
   0   0  30 2612.34   34.10
  -1   2  30 1184.18    7.80
  -3   3  30 1507.25   12.60
   0   3  30  201.48    3.40
  -2   4  30  807.22    5.00
  -4   5  30  235.08    2.30
  -1   5  30  730.73    5.00
  -6   6  30   79.09    2.20
  -3   6  30  380.66    3.70
   0   6  30  391.76    6.90
  -5   7  30  131.49    2.40
  -2   7  30  242.08    3.40
  -7   8  30  199.78    3.60
  -4   8  30  121.29    2.60
  -1   8  30  105.09    3.10
  -9   9  30   19.30    2.80
  -6   9  30  139.29    3.80
  -3   9  30   97.19    3.30
   0   9  30   62.19    4.50
  -8  10  30   32.40    2.10
  -5  10  30   73.69    3.00
  -2  10  30   50.29    3.00
  -7  11  30   23.90    2.30
  -4  11  30   75.39    7.00
  -1   1  31    0.50    0.70
   0   2  31    0.70    0.90
  -2   3  31   60.19    1.30
  -4   4  31    0.90    1.40
  -1   4  31   17.90    0.80
  -3   5  31    2.80    0.90
   0   5  31    1.20    0.80
  -5   6  31   21.20    1.00
  -2   6  31   17.30    1.30
  -7   7  31    2.20    1.10
  -4   7  31    9.20    1.30
  -1   7  31   43.20    2.50
  -6   8  31    1.60    1.10
  -3   8  31    6.60    1.30
   0   8  31    3.60    3.90
  -8   9  31    2.30    1.30
  -5   9  31   12.70    1.90
  -2   9  31    3.90    1.30
 -10  10  31    4.00    3.50
  -7  10  31    4.50    1.80
  -4  10  31    3.60    1.70
  -1  10  31    6.50    2.60
  -6  11  31    4.60    2.10
  -3  11  31    2.50    2.10
   0   1  32  611.14    6.80
  -2   2  32 1623.94   12.80
  -1   3  32  372.46    3.00
  -3   4  32 1084.29    6.80
   0   4  32  425.26    5.60
  -5   5  32  284.47    3.70
  -2   5  32  508.85    4.60
  -4   6  32  260.57    3.30
  -1   6  32  510.55    4.80
  -6   7  32  383.06    4.50
  -3   7  32  245.88    3.10
   0   7  32  153.88    5.00
  -8   8  32  147.89    5.30
  -5   8  32  241.18    3.60
  -2   8  32  117.19    2.90
  -7   9  32  102.09    3.00
  -4   9  32  121.39    3.20
  -1   9  32   68.99    3.00
  -9  10  32   13.30    2.60
  -6  10  32   41.30    2.30
  -3  10  32   52.89    3.80
  -8  11  32   13.20    7.00
  -5  11  32   34.60    2.40
   0   0  33    0.20    2.10
  -1   2  33   15.80    1.10
  -3   3  33    2.30    1.30
   0   3  33    0.50    0.80
  -2   4  33    7.90    0.80
  -4   5  33    3.20    1.30
  -1   5  33   40.10    1.00
  -6   6  33    1.50    1.10
  -3   6  33    2.10    1.10
   0   6  33    2.30    1.80
  -5   7  33    1.30    1.10
  -2   7  33   18.20    1.40
  -7   8  33    8.30    1.40
  -4   8  33   45.80    2.20
  -1   8  33    3.00    2.10
  -9   9  33    2.60    2.90
  -6   9  33    2.20    1.90
  -3   9  33    4.70    1.50
   0   9  33    3.20    4.60
  -8  10  33    3.30    2.10
  -5  10  33    2.80    1.60
  -2  10  33    2.40    2.00
  -7  11  33    3.40    2.30
  -4  11  33    6.40    2.20
  -1   1  34  938.01   12.80
   0   2  34  709.83    9.90
  -2   3  34 1557.04    9.20
  -4   4  34  525.95    6.00
  -1   4  34  567.64    4.60
  -3   5  34  279.07    3.10
   0   5  34  630.04    6.40
  -5   6  34  142.39    2.10
  -2   6  34  302.17    3.50
  -7   7  34  205.88    4.80
  -4   7  34  181.18    2.90
  -1   7  34  175.08    2.80
  -6   8  34  181.68    3.80
  -3   8  34  156.58    3.60
   0   8  34   54.59    3.80
  -8   9  34   37.80    2.40
  -5   9  34  136.89    3.70
  -2   9  34   60.19    2.70
  -7  10  34   28.30    2.30
  -4  10  34   83.29    5.90
   0   1  35    0.30    0.80
  -2   2  35    0.50    0.90
  -1   3  35    6.20    0.80
  -3   4  35   16.60    1.30
   0   4  35    1.00    0.90
  -5   5  35    0.70    1.10
  -2   5  35   15.20    1.00
  -4   6  35    6.60    1.10
  -1   6  35   32.80    1.50
  -6   7  35    7.80    1.20
  -3   7  35    3.80    1.20
   0   7  35    3.00    5.50
  -8   8  35    1.20    2.10
  -5   8  35    2.70    1.40
  -2   8  35    4.00    1.50
  -7   9  35    9.70    1.80
  -4   9  35    4.80    1.90
  -1   9  35    3.80    2.50
  -6  10  35    1.30    2.10
  -3  10  35    2.00    1.90
   0   0  36   49.40    4.80
  -1   2  36  536.75    4.80
  -3   3  36  960.40    8.90
   0   3  36  537.55    7.00
  -2   4  36  438.16    3.70
  -4   5  36  223.78    2.80
  -1   5  36  351.06    3.70
  -6   6  36  298.77    4.70
  -3   6  36  142.89    3.00
   0   6  36  249.78    5.30
  -5   7  36  253.47    4.30
  -2   7  36  179.68    3.00
  -7   8  36  104.59    3.00
  -4   8  36  206.68    3.70
  -1   8  36   70.59    2.90
  -9   9  36   20.30    5.10
  -6   9  36   72.89    2.90
  -3   9  36   64.39    2.90
   0   9  36   53.89    4.60
  -5  10  36   42.10    2.60
  -1   1  37    0.20    1.40
   0   2  37    0.80    1.20
  -2   3  37    7.20    0.80
  -4   4  37    0.90    3.40
  -1   4  37   10.80    0.90
  -3   5  37   16.40    1.40
   0   5  37    0.80    0.90
  -5   6  37    7.10    1.20
  -2   6  37   26.40    1.60
  -7   7  37    1.70    2.00
  -4   7  37    6.70    1.40
  -1   7  37    2.90    1.90
  -6   8  37    5.70    1.90
  -3   8  37    1.20    1.30
   0   8  37    8.10    5.50
  -8   9  37    1.70    1.90
  -5   9  37    4.50    1.70
  -2   9  37    6.10    2.20
  -7  10  37    4.50    2.60
  -4  10  37    3.20    2.10
   0   1  38  404.46    8.90
  -2   2  38  750.02    8.60
  -1   3  38  667.63    6.00
  -3   4  38  233.78    2.70
   0   4  38  329.27    4.00
  -5   5  38  179.98    3.60
  -2   5  38   91.79    1.90
  -4   6  38  111.89    2.50
  -1   6  38  148.39    2.60
  -6   7  38  143.79    3.20
  -3   7  38  113.59    3.10
   0   7  38   75.79    4.00
  -8   8  38   22.10    3.30
  -5   8  38  122.89    3.60
  -2   8  38   70.39    2.90
  -7   9  38   19.00    2.30
  -4   9  38   75.99    5.00
  -1   9  38   20.90    2.70
  -6  10  38   22.50    2.30
   0   0  39    0.00    2.50
  -1   2  39    1.00    0.70
  -3   3  39    1.00    1.90
   0   3  39    0.70    1.30
  -2   4  39    2.50    1.10
  -4   5  39   23.20    1.30
  -1   5  39   20.90    1.30
  -6   6  39    0.90    1.40
  -3   6  39    1.50    1.10
   0   6  39    2.00    2.50
  -5   7  39    4.40    1.50
  -2   7  39    1.40    1.30
  -7   8  39    2.30    1.90
  -4   8  39    3.80    1.60
  -1   8  39    7.90    3.40
  -6   9  39    2.40    1.80
  -3   9  39    3.90    2.50
  -1   1  40  167.08    4.70
   0   2  40  559.04    7.60
  -2   3  40  339.77    3.30
  -4   4  40  226.78    3.70
  -1   4  40  324.87    3.80
  -3   5  40  123.49    2.00
   0   5  40  171.98    4.20
  -5   6  40  269.47    3.90
  -2   6  40  118.59    3.20
  -7   7  40   73.89    3.70
  -4   7  40  165.88    3.90
  -1   7  40  128.69    3.80
  -6   8  40   53.39    3.00
  -3   8  40  117.69    4.00
   0   8  40   55.09    5.50
  -5   9  40   43.70    2.60
  -2   9  40   40.40    3.10
   0   1  41    0.10    1.50
  -2   2  41    1.20    1.60
  -1   3  41   16.60    1.30
  -3   4  41    1.00    1.40
   0   4  41    2.80    1.60
  -5   5  41    0.00    2.00
  -2   5  41    8.40    1.30
  -4   6  41   12.70    1.40
  -1   6  41    1.70    1.40
  -6   7  41    4.10    1.80
  -3   7  41    2.70    1.60
   0   7  41    1.90    8.90
  -8   8  41    2.20    2.70
  -5   8  41    3.60    1.80
  -2   8  41    7.70    2.20
  -4   9  41    6.00    2.10
   0   0  42  328.97   15.80
  -1   2  42  501.45    6.10
  -3   3  42  171.78    2.90
   0   3  42  633.84    8.20
  -2   4  42  235.78    2.90
  -4   5  42  201.48    3.00
  -1   5  42  125.59    2.60
  -6   6  42  150.38    5.10
  -3   6  42  123.39    3.10
   0   6  42   80.39    5.10
  -5   7  42  124.49    3.70
  -2   7  42   87.59    3.00
  -7   8  42   25.20    2.40
  -4   8  42  100.29    4.70
  -1   8  42   49.70    3.20
  -1   1  43    1.10    1.70
   0   2  43    2.30    1.80
  -2   3  43    7.30    1.10
  -4   4  43    0.50    1.50
  -1   4  43    4.50    1.60
  -3   5  43    2.50    1.10
   0   5  43    0.00    3.60
  -5   6  43    5.00    1.40
  -2   6  43    3.00    1.60
  -7   7  43    4.00    2.70
  -4   7  43    2.20    1.50
  -1   7  43    9.10    2.70
  -6   8  43    3.00    1.90
  -3   8  43    3.60    2.10
   0   1  44  287.87    6.80
  -2   2  44  120.19    4.10
  -1   3  44  333.27    4.50
  -3   4  44  117.29    2.60
   0   4  44  207.48    5.20
  -5   5  44  208.78    4.70
  -2   5  44  152.98    3.00
  -4   6  44  171.68    3.70
  -1   6  44   91.49    3.80
  -6   7  44   48.20    2.50
  -3   7  44  124.79    5.20
   0   7  44   63.29    4.80
  -5   8  44   49.60    2.90
  -2   8  44   65.19    3.50
   0   0  45    0.00    2.80
  -1   2  45    2.90    1.40
  -3   3  45    0.60    2.00
   0   3  45    2.80    1.90
  -2   4  45    1.00    1.90
  -4   5  45    2.30    1.50
  -1   5  45    8.90    1.90
  -6   6  45    4.90    4.60
  -3   6  45    1.50    1.50
   0   6  45   12.90    5.00
  -5   7  45    3.30    1.70
  -2   7  45    6.10    2.20
  -4   8  45   12.10    2.80
  -1   1  46  311.97    8.30
   0   2  46  291.57    6.80
  -2   3  46   81.39    2.90
  -4   4  46  104.79    3.70
  -1   4  46  131.69    2.80
  -3   5  46  131.39    3.40
   0   5  46   33.50    3.70
  -5   6  46   90.79    3.70
  -2   6  46   61.89    2.90
  -4   7  46   65.39    4.20
  -1   7  46   37.80    2.90
   0   1  47    1.60    2.00
  -2   2  47    1.30    2.40
  -1   3  47    4.10    1.80
  -3   4  47    4.10    1.50
   0   4  47    3.80    2.70
  -5   5  47    1.10    2.50
  -2   5  47    5.40    1.60
  -4   6  47    2.30    1.70
  -1   6  47    6.90    2.80
  -3   7  47    2.60    2.10
   0   0  48  305.97   16.80
  -1   2  48  125.29    3.40
  -3   3  48   50.39    3.10
   0   3  48  113.29    4.20
  -2   4  48  117.09    3.20
  -4   5  48  118.49    3.70
  -1   5  48   82.49    3.80
  -3   6  48  103.99    4.30
  -1   1  49    1.40    2.00
   0   2  49    1.60    2.00
  -2   3  49    2.00    1.80
  -4   4  49    2.80    2.00
  -1   4  49    5.00    2.20
  -3   5  49    1.60    2.20
   0   5  49    1.90    4.60
  -2   6  49    5.10    2.20
   0   1  50  249.97    6.40
  -2   2  50  103.99    5.00
  -1   3  50   84.99    2.70
  -3   4  50  100.29    3.30
   0   4  50   66.49    5.50
  -2   5  50  109.19    3.70
   0   0  51    0.00    3.50
  -1   2  51    1.80    1.70
  -3   3  51    3.60    2.20
   0   3  51    1.20    3.10
  -2   4  51    2.50    2.20
  -1   1  52  153.48    6.00
   0   2  52   61.29    3.50
  -2   3  52   78.29    3.20
  -1   4  52   64.19    3.70
   0   1  53    3.60    2.20
  -2   2  53    2.10    2.60
  -1   3  53    2.20    2.20
   0   0  54  128.19    8.00
  -1   2  54   58.79    2.50
   0   0   0    0.00    0.00

_computing_structure_solution     'SHELXT 2014/5 (Sheldrick, 2014)'
;
_shelx_hkl_checksum                43564
_olex2_submission_special_instructions  'No special instructions were received'
